# Supplementary material
Source: publisher figshare collection journal article supplement (https://acs.figshare.com/ndownloader/files/24125864)
Supplement: Supplementary file 1 [file 24125864]

**Supporting Information**  
**For**  
**Ligand-Accelerated Palladium(II)-Catalyzed Enantioselective**  
**Amination of C(sp<sup>2</sup>)-H Bonds**

Xiu-Fen Cheng,<sup>§,†,‡</sup> Fan Fei,<sup>§,†</sup> Yan Li,<sup>\*,†</sup> Yi-Ming Hou,<sup>†</sup> Xin Zhou,<sup>†</sup> and Xi-Sheng Wang<sup>\*,†</sup>

<sup>†</sup>Hefei National Laboratory for Physical Sciences at the Microscale and Department of Chemistry, University of Science and Technology of China, 96 Jinzhai Road, Hefei, Anhui 230026, China

<sup>‡</sup>College of Chemistry, Chemical Engineering and Materials Science, Collaborative Innovation Center of Functionalized Probes for, Chemical Imaging in Universities of Shandong, Key Laboratory of Molecular and Nano Probes, Ministry of Education, Shandong Provincial Key Laboratory of Clean Production of Fine Chemicals, Shandong Normal University, Jinan, 250014 P. R. China.

\*liyan08@ustc.edu.cn; xswang77@ustc.edu.cn.

**Contents**

|                                                                   |     |
|-------------------------------------------------------------------|-----|
| <b>General Information</b>                                        | S2  |
| <b>Tables of the Optimization of Reaction Conditions</b>          | S3  |
| <b>Experimental Procedures</b>                                    | S6  |
| General Procedure for Preparation of Ligands                      | S6  |
| General Procedure for Preparation of Substrates                   | S10 |
| Pd(II)-Catalyzed enantioselective C(sp <sup>2</sup> )-H amination | S18 |
| Derivatizations of Product <b>2a</b>                              | S26 |
| Determination of the Absolute Configuration of Product <b>2n</b>  | S27 |
| <b>References</b>                                                 | S34 |
| <b><sup>1</sup>H and <sup>13</sup>C NMR Spectra</b>               | S35 |
| <b>Chiral HPLC Data</b>                                           | S85 |

**General Information:**

NMR spectra were recorded on Bruker-400 (400 MHz for  $^1\text{H}$ ; 100 MHz for  $^{13}\text{C}$ ) instruments internally referenced to  $\text{SiMe}_4$  signal. High resolution mass spectra were recorded on P-SIMS-Gly of Bruker Daltonics Inc. using ESI-TOF (electrospray ionization-time of flight). Optical rotations were determined at 589 nm (sodium D line) by using an Anton-Paar MCP 200 polarimeter. HPLC analysis was performed on Shimadzu LC-20AT. Chiral column AD-H, OD-H, and ID were purchased from Daicel Chemical Industries, LTD. Trifluoroethanol and pentafluoropropanol were purchased from Qina Chemie and used as received. Silver oxide was obtained from Sinopharm and used as received. Cbz-Phe-OH was obtained from Darui Finechemical and used as received. Zinc acetate was purchased from Alfa and used as received. Palladium diacetate and palladium hexafluoroacetylacetonate were purchased from Strem and used as received. Dibenzyl phosphate was obtained from Meryer and used as received.

## Tables of the Optimization of Reaction Conditions

**Table S1.** Enantioselective C(sp<sup>2</sup>)-H activation/C-N formation: Solvent Screening<sup>a</sup>

Reaction scheme showing the conversion of **1a** to **2a** under the following conditions: Pd(OAc)<sub>2</sub> (10 mol%), Boc-Ile-OH (30 mol%), Ag<sub>2</sub>CO<sub>3</sub> (2.0 equiv.), solvent, N<sub>2</sub>, 100 °C, 24 h.

| entry | solvent                            | yield (%) <sup>b</sup> | ee (%) <sup>c</sup> | entry           | solvent                            | yield (%) <sup>b</sup> | ee (%) <sup>c</sup> |
|-------|------------------------------------|------------------------|---------------------|-----------------|------------------------------------|------------------------|---------------------|
| 1     | <i>t</i> -BuOH                     | 42                     | 0                   | 11              | Et <sub>2</sub> O                  | 23                     | 0                   |
| 2     | <i>t</i> -AmOH                     | 39                     | 0                   | 12              | toluene                            | 54                     | 0                   |
| 3     | CF <sub>3</sub> CH <sub>2</sub> OH | 97                     | 14                  | 13              | PhCl                               | 70                     | 0                   |
| 4     | MeOH                               | 99                     | 4                   | 14              | DMSO                               | 31                     | 16                  |
| 5     | dioxane                            | 32                     | 13                  | 15              | <i>n</i> -BuOH                     | 58                     | 0                   |
| 6     | DMF                                | 24                     | 0                   | 16              | 2-Methoxyethanol                   | 45                     | 18                  |
| 7     | THF                                | 24                     | 0                   | 17              | EA                                 | 26                     | 0                   |
| 8     | DCE                                | 54                     | 0                   | 18              | acetone                            | 26                     | 7                   |
| 9     | MeCN                               | -                      | 0                   | 19              | Ethylene glycol                    | trace                  | 0                   |
| 10    | MeNO <sub>2</sub>                  | 42                     | 5                   | 20 <sup>d</sup> | CF <sub>3</sub> CH <sub>2</sub> OH | 88                     | 14                  |

<sup>a</sup> Reaction conditions: **1a** (0.15 mmol), Pd(OAc)<sub>2</sub> (0.015 mmol, 10 mol%), Boc-Ile-OH (0.045 mmol, 30 mol%), Ag<sub>2</sub>CO<sub>3</sub> (0.3 mmol, 2.0 equiv.), solvent (1.5 mL), N<sub>2</sub>, 100 °C, 24 h. <sup>b</sup> Isolated yield. <sup>c</sup> The ee value was determined by chiral HPLC analysis. <sup>d</sup> 80 °C.

**Table S2.** Enantioselective C(sp<sup>2</sup>)-H activation/C-N formation: Oxidant Screening<sup>a</sup>

Reaction scheme showing the conversion of **1a** to **2a** under the following conditions: Pd(OAc)<sub>2</sub> (10 mol%), Boc-Ile-OH (30 mol%), oxidant (2.0 equiv.), TFE, N<sub>2</sub>, 80 °C, 24 h.

| entry | oxidant              | yield (%) <sup>b</sup> | ee (%) <sup>c</sup> | entry           | oxidant                                      | yield (%) <sup>b</sup> | ee (%) <sup>c</sup> |
|-------|----------------------|------------------------|---------------------|-----------------|----------------------------------------------|------------------------|---------------------|
| 1     | AgOAc                | 71                     | 13                  | 8               | PIDA                                         | 95                     | 0                   |
| 2     | Ag <sub>2</sub> O    | 69                     | 28                  | 9               | K <sub>2</sub> S <sub>2</sub> O <sub>8</sub> | 27                     | 2                   |
| 3     | AgOTFA               | 13                     | 17                  | 10              | NFSI                                         | 19                     | 7                   |
| 4     | AgOTf                | 0                      | 0                   | 11              | FTB                                          | 16                     | 0                   |
| 5     | AgF                  | 42                     | 19                  | 12              | BPO                                          | 68                     | 9                   |
| 6     | AgClO <sub>4</sub>   | 0                      | 0                   | 13              | NCS                                          | 42                     | 0                   |
| 7     | Cu(OAc) <sub>2</sub> | trace                  | -                   | 14 <sup>d</sup> | Ag <sub>2</sub> O                            | 61                     | 29                  |

<sup>a</sup> Reaction conditions: **1a** (0.15 mmol), Pd(OAc)<sub>2</sub> (0.015 mmol, 10 mol%), Boc-Ile-OH (0.045 mmol, 30 mol%), oxidant (0.3 mmol, 2.0 equiv.), TFE (1.5 mL), N<sub>2</sub>, 80 °C, 24 h. <sup>b</sup> Isolated yield. <sup>c</sup> The ee value was determined by chiral HPLC analysis. <sup>d</sup> 12 h.

**Table S3.** Enantioselective C(sp<sup>2</sup>)-H activation/C-N formation: Ligand Screening<sup>a</sup>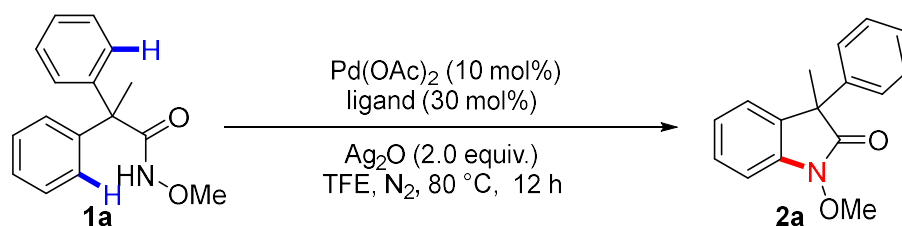

| entry | ligand                   | yield (%) <sup>b</sup> | ee (%) <sup>c</sup> | entry | ligand                   | yield (%) <sup>b</sup> | ee (%) <sup>c</sup> |
|-------|--------------------------|------------------------|---------------------|-------|--------------------------|------------------------|---------------------|
| 1     | Ac-Ile-OH                | 56                     | 17                  | 23    | Boc-Asp(Bn)-OH           | 49                     | 41                  |
| 2     | Fmoc-Ile-OH              | 32                     | 16                  | 24    | Boc-Met-OH               | 48                     | 12                  |
| 3     | Cbz-Ile-OH               | 66                     | 28                  | 25    | Boc-Nle-OH               | 53                     | 36                  |
| 4     | piv-Ile-OH               | 44                     | 10                  | 26    | Boc-Ser(Bn)-OH           | 62                     | 29                  |
| 5     | Bz-Ile-OH                | 48                     | 3                   | 27    | Boc-Thr( <i>t</i> Bu)-OH | 49                     | 35                  |
| 6     | Boc-Ile-OH               | 61                     | 29                  | 28    | Boc-Thr-OH               | 50                     | 12                  |
| 7     | Boc-Ala-OH               | 45                     | 40                  | 29    | Boc-Trp-OH               | 33                     | 13                  |
| 8     | Boc-Leu-OH               | 44                     | 33                  | 30    | Boc-Nva-OH               | 50                     | 33                  |
| 9     | Boc-Val-OH               | 45                     | 26                  | 31    | Boc-Trp(Boc)-OH          | 51                     | 44                  |
| 10    | Boc-Tle-OH               | 42                     | 34                  | 32    | Boc-Asp(Me)-OH           | 47                     | 37                  |
| 11    | Boc-Phe-OH               | 47                     | 45                  | 33    | Boc-Thr(Bn)-OH           | 58                     | 30                  |
| 12    | Boc-CyGly-OH             | 40                     | 27                  | 34    | Cbz-Ala-OH               | 51                     | 40                  |
| 13    | Boc-Nal-OH               | 48                     | 45                  | 35    | Cbz-Phe-OH               | 64                     | 57                  |
| 14    | Boc-HPhe-OH              | 48                     | 32                  | 36    | Cbz-Ser-OH               | 57                     | 13                  |
| 15    | Boc-Tyr( <i>t</i> Bu)-OH | 47                     | 41                  | 37    | Cbz-Arg-OH               | 32                     | 8                   |
| 16    | Boc-Tyr(Bn)-OH           | 50                     | 36                  | 38    | Cbz-Trp-OH               | 32                     | 8                   |
| 17    | Boc-Tyr-OH               | 45                     | 17                  | 39    | Cbz-Pro-OH               | 55                     | 10                  |
| 18    | Boc-Asp(Cy)-OH           | 58                     | 42                  | 40    | Cbz-PhGly-OH             | 58                     | 17                  |
| 19    | Boc-Asp( <i>t</i> Bu)-OH | 48                     | 36                  | 41    | Cbz-Leu-OH               | 55                     | 27                  |
| 20    | Boc-Glu( <i>t</i> Bu)-OH | 54                     | 37                  | 42    | Cbz-Nva-OH               | 62                     | 38                  |
| 21    | Boc-Glu(Cy)-OH           | 55                     | 34                  | 43    | Cbz-Val-OH               | 54                     | 28                  |
| 22    | Boc-Glu(Bn)-OH           | 47                     | 34                  |       |                          |                        |                     |

<sup>a</sup> Reaction conditions: **1a** (0.15 mmol), Pd(OAc)<sub>2</sub> (0.015 mmol, 10 mol%), ligand (0.045 mmol, 30 mol%), Ag<sub>2</sub>O (0.3 mmol, 2.0 equiv.), TFE (1.5 mL), N<sub>2</sub>, 80 °C, 12 h. <sup>b</sup> Isolated yield. <sup>c</sup> The ee value was determined by chiral HPLC analysis.

**Table S4.** Enantioselective C(sp<sup>2</sup>)-H activation/C-N formation: Palladium Salt and Additive Screening<sup>a</sup>

Reaction scheme: **1a**  $\xrightarrow[\text{additive, Ag}_2\text{O (2.0 eq.)}]{[\text{Pd}] (10 \text{ mol\%}), \text{pNz-Phe-NHOMe (30 mol\%)}}$  **2a**  
 Conditions: TFE, N<sub>2</sub>, 60 °C

| entry           | [Pd]                    | additive                                     | time (h) | yield (%) <sup>b</sup> | ee (%) <sup>c</sup> |
|-----------------|-------------------------|----------------------------------------------|----------|------------------------|---------------------|
| 1               | Pd(OAc) <sub>2</sub>    | -                                            | 12       | 85                     | 86                  |
| 2               | Pd(OAc) <sub>2</sub>    | Cu(acac) <sub>2</sub> (10 mol%)              | 12       | 78                     | 91                  |
| 3               | Pd(OAc) <sub>2</sub>    | Cu(hfacac) <sub>2</sub> (10 mol%)            | 12       | 72                     | 91                  |
| 4               | Pd(acac) <sub>2</sub>   | -                                            | 12       | 69                     | 89                  |
| 5               | Pd(hfacac) <sub>2</sub> | -                                            | 12       | 43                     | 92                  |
| 6               | Pd(acac) <sub>2</sub>   | Cu(OAc) <sub>2</sub> (10 mol%)               | 12       | 67                     | 92                  |
| 7               | Pd(hfacac) <sub>2</sub> | Cu(OAc) <sub>2</sub> (10 mol%)               | 12       | 70                     | 92                  |
| 8               | Pd(hfacac) <sub>2</sub> | Zn(OAc) <sub>2</sub> (10 mol%)               | 12       | 77                     | 94                  |
| 9               | Pd(hfacac) <sub>2</sub> | Zn(OAc) <sub>2</sub> (15 mol%)               | 12       | 80                     | 94                  |
| 10              | Pd(hfacac) <sub>2</sub> | Zn(OAc) <sub>2</sub> (15 mol%)               | 24       | 86                     | 92                  |
| 11              | Pd(hfacac) <sub>2</sub> | Zn(OAc) <sub>2</sub> (15 mol%)/DPP (10 mol%) | 24       | 93                     | 93                  |
| 12              | Pd(hfacac) <sub>2</sub> | Zn(OAc) <sub>2</sub> (15 mol%)/DBP (10 mol%) | 24       | 93                     | 94                  |
| 13              | Pd(hfacac) <sub>2</sub> | DBP (10 mol%)                                | 24       | 60                     | 92                  |
| 14              | Pd(hfacac) <sub>2</sub> | Zn(OAc) <sub>2</sub> (15 mol%)/DBP (30 mol%) | 24       | 90                     | 95                  |
| 15 <sup>d</sup> | Pd(hfacac) <sub>2</sub> | Zn(OAc) <sub>2</sub> (15 mol%)/DBP (30 mol%) | 24       | 95                     | 95                  |
| 16 <sup>d</sup> | Pd(acac) <sub>2</sub>   | Zn(OAc) <sub>2</sub> (15 mol%)/DBP (30 mol%) | 24       | 92                     | 95                  |

<sup>a</sup> Reaction conditions: **1a** (0.15 mmol), Pd(OAc)<sub>2</sub> (0.015 mmol, 10 mol%), pNz-Phe-NHOMe (0.045 mmol, 30 mol%), additive, Ag<sub>2</sub>O (0.3 mmol, 2.0 equiv.), TFE (2.5 mL), N<sub>2</sub>, 60 °C, 12 h. <sup>b</sup> Isolated yield. <sup>c</sup> The ee value was determined by chiral HPLC analysis. <sup>d</sup> PFP was used as solvent.

## Experimental procedure

All of the substrates were prepared through amidations of diarylacetic acids. The acid, which was used for preparation of **1a**, **1r** and **1s** was purchased from Fluorochem and used as received. The acids, which was used for preparation of **1b**,<sup>1</sup> **1e**,<sup>2</sup> **1g**,<sup>1</sup> **1i**,<sup>1</sup> **1j**,<sup>2</sup> **1k**,<sup>1</sup> **1n**,<sup>1</sup> were prepared according to the reported procedures.

## General procedure of preparation of ligands (L15-17)<sup>3</sup>

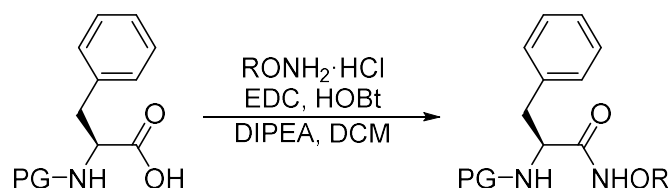

To a DCM (40 mL) solution of mono-protected phenylalanine (10 mmol), HOBT (1.49 g, 11 mmol, 1.1 equiv.) and EDCI (2.1 g, 11 mmol, 1.1 equiv.), *O*-alkyl hydroxylamine hydrochloride (15 mmol, 1.5 equiv.) and DIPEA (2.6 mL, 15 mmol, 1.5 equiv.) were added in an ice-bath. After stirring at room temperature overnight, the reaction mixture was quenched by water. The mixture was extracted by DCM for three times. The combined organic phase was washed with brine, dried over anhydrous Na<sub>2</sub>SO<sub>4</sub>, filtered, and concentrated under reduced pressure. The residue was purified by column chromatography (DCM/MeOH = 100:1 to 50:1), and the ligand was obtained after recrystallization as white solid.

### Benzyl (*S*)-(1-(methoxyamino)-1-oxo-3-phenylpropan-2-yl)carbamate (Cbz-Phe-NHOMe, L15)

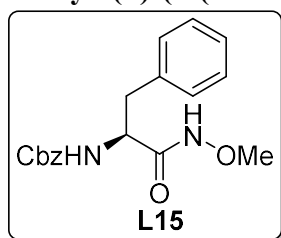

1.45 g (44% yield). <sup>1</sup>H NMR (400 MHz, CDCl<sub>3</sub>) δ 9.05 (s, 1H), 7.39 – 7.20 (m, 8H), 7.18 (d, *J* = 6.8 Hz, 2H), 5.57 (d, *J* = 7.7 Hz, 1H), 5.05 (d, *J* = 12.8 Hz, 1H), 5.00 (d, *J* = 12.2 Hz, 1H), 4.31 (dd, *J* = 15.3, 7.5 Hz, 1H), 3.57 (s, 3H), 3.05 (d, *J* = 7.3 Hz, 2H). <sup>13</sup>C NMR (100 MHz, CDCl<sub>3</sub>) δ 168.5, 156.2, 136.1, 129.5, 128.8, 128.7, 128.4, 128.1, 127.3, 67.4, 64.4, 54.1, 38.5. HRMS (ESI) *m/z*: [M + H]<sup>+</sup> Calcd for C<sub>18</sub>H<sub>21</sub>O<sub>4</sub>N<sub>2</sub> 329.1496; Found 329.1497. [α]<sub>D</sub><sup>20</sup> = -11.6° (*c* 1.0, CHCl<sub>3</sub>).

### Benzyl (*S*)-(1-(ethoxyamino)-1-oxo-3-phenylpropan-2-yl)carbamate (Cbz-Phe-NHOEt, L16)

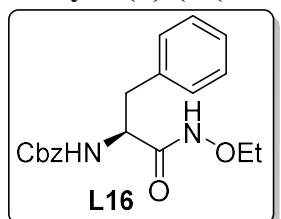

1.37 g (40% yield). <sup>1</sup>H NMR (400 MHz, CDCl<sub>3</sub>) δ 9.11 (s, 1H), 7.40 – 7.21 (m, 8H), 7.18 (d, *J* = 6.8 Hz, 2H), 5.66 (d, *J* = 8.0 Hz, 1H), 5.01 (q, *J* = 12.2 Hz, 2H), 4.34 (dd, *J* = 15.4, 7.5 Hz,

1H), 3.86 – 3.63 (m, 2H), 3.04 (d,  $J = 7.5$  Hz, 2H), 1.11 (t,  $J = 7.0$  Hz, 3H).  $^{13}\text{C}$  NMR (100 MHz,  $\text{CDCl}_3$ )  $\delta$  168.6, 156.3, 136.2, 136.0, 129.5, 128.8, 128.7, 128.4, 128.1, 127.2, 72.2, 67.3, 54.2, 38.6, 13.4. HRMS (ESI)  $m/z$ :  $[\text{M} + \text{H}]^+$  Calcd for  $\text{C}_{19}\text{H}_{23}\text{O}_4\text{N}_2$  343.1652; Found 343.1653.  $[\alpha]_{\text{D}}^{20} = -10.6^\circ$  ( $c$  1.0,  $\text{CHCl}_3$ ).

**Benzyl (S)-(1-((benzyloxy)amino)-1-oxo-3-phenylpropan-2-yl)carbamate (Cbz-Phe-NHOBn, L17)**

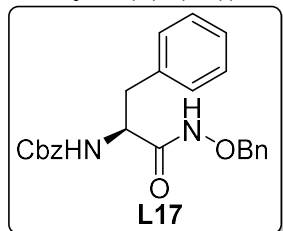

1.77 g (44% yield).  $^1\text{H}$  NMR (400 MHz,  $\text{CDCl}_3$ )  $\delta$  8.94 (s, 1H), 7.42 – 7.18 (m, 13H), 7.15 (d,  $J = 6.4$  Hz, 2H), 5.53 (d,  $J = 8.1$  Hz, 1H), 4.97 (d,  $J = 12.1$  Hz, 1H), 4.91 (d,  $J = 12.2$  Hz, 1H), 4.77 (d,  $J = 11.2$  Hz, 1H), 4.64 (d,  $J = 11.2$  Hz, 1H), 4.37 – 4.20 (m, 1H), 3.12 – 2.94 (m, 2H).  $^{13}\text{C}$  NMR (100 MHz,  $\text{CDCl}_3$ )  $\delta$  168.5, 156.1, 136.1, 136.0, 135.0, 129.5, 129.4, 128.8, 128.7, 128.6, 128.4, 128.1, 127.2, 78.4, 67.3, 54.1, 38.5. HRMS (ESI)  $m/z$ :  $[\text{M} + \text{H}]^+$  Calcd for  $\text{C}_{24}\text{H}_{25}\text{O}_4\text{N}_2$  405.1809; Found 405.1811.  $[\alpha]_{\text{D}}^{20} = -15.3^\circ$  ( $c$  1.0,  $\text{CHCl}_3$ ).

**4-Methoxybenzyl (S)-(1-(methoxyamino)-1-oxo-3-phenylpropan-2-yl)carbamate (pMz-Phe-NHOMe, L20)**

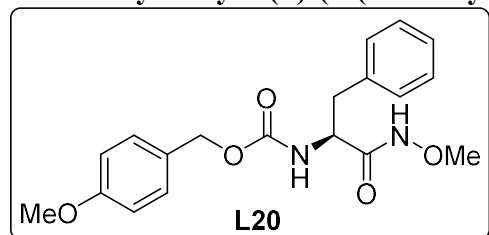

0.47 g (13% yield).  $^1\text{H}$  NMR (400 MHz,  $\text{CDCl}_3$ )  $\delta$  8.45 (s, 1H), 7.34 – 7.22 (m, 5H), 7.19 (d,  $J = 6.8$  Hz, 2H), 6.88 (d,  $J = 8.6$  Hz, 2H), 5.35 – 5.21 (m, 1H), 5.01 (s, 2H), 4.23 (q,  $J = 7.3$  Hz, 1H), 3.81 (s, 3H), 3.61 (s, 3H), 3.14 – 2.97 (m, 2H).  $^{13}\text{C}$  NMR (100 MHz,  $\text{CDCl}_3$ )  $\delta$  168.6, 159.8, 136.1, 130.1, 129.5, 129.0, 128.1, 127.4, 114.1, 67.3, 64.5, 55.4, 54.2, 38.3. HRMS (ESI)  $m/z$ :  $[\text{M} + \text{H}]^+$  Calcd for  $\text{C}_{19}\text{H}_{23}\text{O}_5\text{N}_2$  359.1601; Found 359.1615.  $[\alpha]_{\text{D}}^{20} = -10.0^\circ$  ( $c$  0.5,  $\text{CHCl}_3$ ).

**General procedure of preparation of ligands (L18-19)**

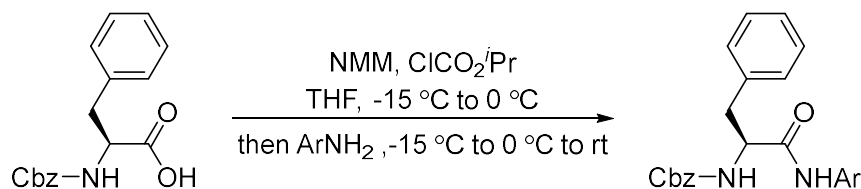

To a solution of Cbz-Phe-OH (670.4 mg, 2.24 mmol) and NMM (0.25 mL, 2.24 mmol, 1.0 equiv.) in THF (2 mL), isopropyl chloroformate (246  $\mu\text{L}$ , 2.24 mmol, 1.0 equiv.) was added dropwise at  $-15^\circ\text{C}$ . After stirring at  $0^\circ\text{C}$  for 5 min, a solution of arylamine (2.24 mmol, 1.0 equiv.) in THF (2 mL) was added at  $-15^\circ\text{C}$ . The mixture was stirred at  $0^\circ\text{C}$  for 1 h, and then at room temperature overnight. After the reaction was completed, solvent was removed under reduced pressure. The residue was dissolved in EtOAc,

washed with 2N HCl (aq.), 0.5 N NaHCO<sub>3</sub> (aq.), and brine, dried over anhydrous Na<sub>2</sub>SO<sub>4</sub>, filtered, and concentrated under reduced pressure. After purifying by column chromatography (DCM/MeOH = 100:1 to 50:1), ligand was obtained through recrystallization as white solid.

**Benzyl (S)-(1-oxo-1-((perfluorophenyl)amino)-3-phenylpropan-2-yl)carbamate**

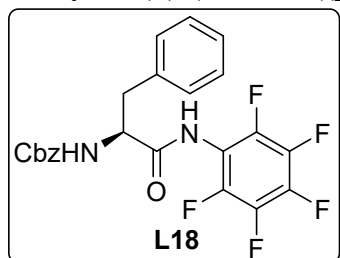

**(Cbz-Phe-NHPh<sup>F</sup>, L18)**

0.23 g (22% yield). <sup>1</sup>H NMR (400 MHz, CDCl<sub>3</sub>) δ 7.73 (s, 1H), 7.37 – 7.25 (m, 8H), 7.22 (d, *J* = 6.8 Hz, 2H), 5.33 (s, 1H), 5.12 (d, *J* = 12.0 Hz, 1H), 5.07 (d, *J* = 12.3 Hz, 1H), 4.67 (d, *J* = 6.2 Hz, 1H), 3.18 (d, *J* = 7.0 Hz, 2H). <sup>13</sup>C

NMR (100 MHz, CDCl<sub>3</sub>) δ 170.3, 156.7 (m), 144.2 (m), 141.7 (m), 139.1 (m), 136.5 (m), 135.8 (d, *J* = 5.4 Hz), 129.4, 128.9, 128.6, 128.4, 127.9, 127.4, 111.4 (m), 67.5, 56.3, 38.5. HRMS (ESI) *m/z*: [M + H]<sup>+</sup> Calcd for C<sub>23</sub>H<sub>18</sub>O<sub>3</sub>N<sub>2</sub>F<sub>5</sub> 465.1232; Found 465.1230. [α]<sub>D</sub><sup>20</sup> = +9.7° (*c* 1.0, CHCl<sub>3</sub>).

**Benzyl (S)-(1-((4-nitrophenyl)amino)-1-oxo-3-phenylpropan-2-yl)carbamate**

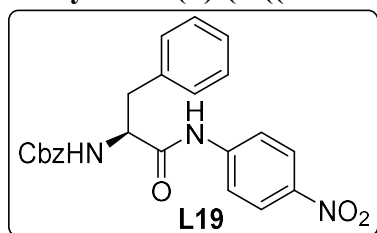

**(Cbz-Phe-NHpNP, L19)**

0.31 g (31% yield). <sup>1</sup>H NMR (400 MHz, CDCl<sub>3</sub>) δ 8.39 (s, 1H), 8.10 (d, *J* = 9.1 Hz, 2H), 7.46 (d, *J* = 9.1 Hz, 2H), 7.38 – 7.23 (m, 8H), 7.19 (d, *J* = 6.2 Hz, 2H), 5.43 (d, *J* = 7.5 Hz, 1H), 5.10 (s, 2H), 4.56 (d, *J* = 7.2 Hz, 1H), 3.15 (d, *J* = 7.2 Hz, 2H). <sup>13</sup>C

NMR (100 MHz, CDCl<sub>3</sub>) δ 169.9, 143.9, 143.1, 136.0, 135.8, 129.3, 129.2, 128.8, 128.6, 128.2, 127.6, 125.0, 119.4, 67.8, 57.4, 38.1. HRMS (ESI) *m/z*: [M + H]<sup>+</sup> Calcd for C<sub>23</sub>H<sub>22</sub>O<sub>5</sub>N<sub>3</sub> 420.1554; Found 420.1550. [α]<sub>D</sub><sup>20</sup> = +2.2° (*c* 0.5, CHCl<sub>3</sub>).

**Preparation of L21<sup>4</sup>**

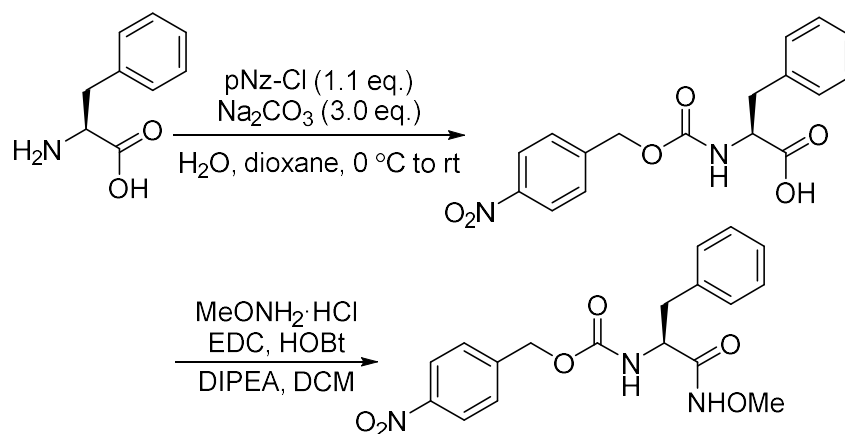



To an aqueous solution of  $\text{Na}_2\text{CO}_3$  (620 mg, 5.81 mmol, 3.0 equiv.) and L-phenylalanine (320 mg, 1.94 mmol), *p*-nitrobenzyl chloroformate (460 mg, 2.14 mmol, 1.1 equiv.) in 1,4-dioxane (2 mL) was added dropwise at 0 °C. After stirring at 0 °C for 1.5 h, the reaction mixture was stirred at room temperature for another 20 h. The mixture was separated by  $\text{Et}_2\text{O}/\text{H}_2\text{O}$ . The aqueous phase was acidified by 3N HCl (aq.) at 0 °C to pH = 1, extracted with EtOAc for three times. The combined organic phase was washed with brine, dried over anhydrous  $\text{Na}_2\text{SO}_4$ , filtered, and concentrated under reduced pressure. The residue was used directly without purification. Then, the similar amidation according to **L15** was carried out to give **L21** (0.25 g, 34% overall yield) as white solid.

**4-Nitrobenzyl (S)-(1-(methoxyamino)-1-oxo-3-phenylpropan-2-yl)carbamate (pNz-Phe-NHOMe, L21)**

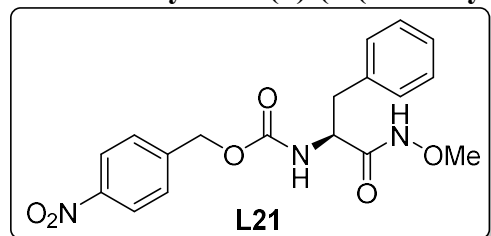

$^1\text{H}$  NMR (400 MHz, Acetone- $d_6$ )  $\delta$  10.39 (s, 1H), 8.21 (d,  $J$  = 8.7 Hz, 2H), 7.55 (d,  $J$  = 8.5 Hz, 2H), 7.37 – 7.26 (m, 4H), 7.26 – 7.19 (m, 1H), 6.81 (d,  $J$  = 8.3 Hz, 1H), 5.17 (q,  $J$  = 14.0 Hz, 2H), 4.28 (dd,  $J$  = 15.0, 8.4 Hz, 1H), 3.59 (s, 3H), 3.14 (dd,  $J$  = 13.6, 6.1 Hz, 1H), 2.95 (dd,  $J$  = 13.5, 8.8 Hz, 1H).  $^{13}\text{C}$  NMR (100 MHz, Acetone- $d_6$ )  $\delta$  168.7, 156.4, 148.3, 145.9, 138.3, 130.3, 129.2, 128.8, 127.4, 124.3, 65.4, 63.9, 55.3, 39.0. HRMS (ESI)  $m/z$ :  $[\text{M} + \text{H}]^+$  Calcd for  $\text{C}_{18}\text{H}_{20}\text{O}_6\text{N}_3$  374.1347; Found 374.1347.  $[\alpha]_{\text{D}}^{20}$  = -9.2° ( $c$  0.5,  $\text{CHCl}_3$ ).

**Preparation of L22<sup>5</sup>**

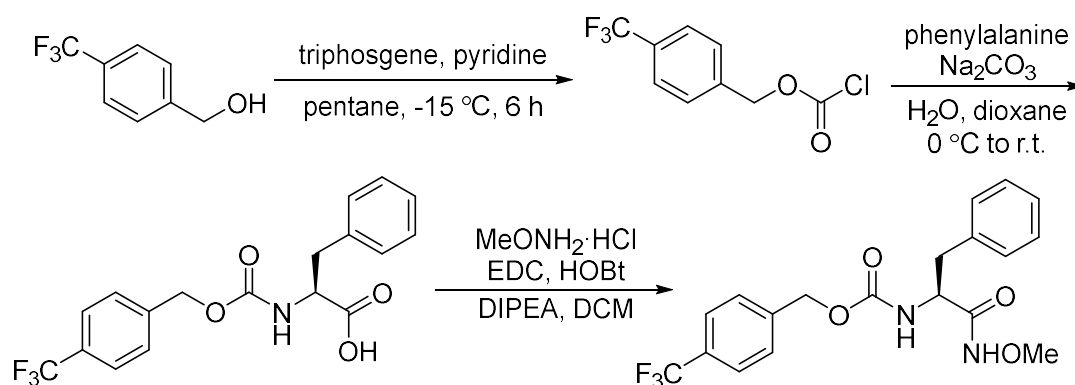

In a sealed flask, triphosgene (2.5 g, 8.75 mmol, 1.75 equiv.) was dissolved in pentane (12.5 mL) at -15 °C. Pyridine (0.4 mL, 5 mmol, 1.0 equiv.) was added dropwise via syringe. After stirring for 1 h, a solution of 4-trifluoromethylbenzyl alcohol (881 mg, 5 mmol) in pentane (if the alcohol cannot be dissolved completely, acetone should be

added as little as possible) was added to the reaction mixture dropwise via syringe, and the released gas was aspirated via syringe simultaneously, which was quenched by saturated  $\text{Na}_2\text{CO}_3$  (aq.). The reaction mixture was stirred until arylmethanol cannot be detected by TLC (6 h usually). After that, the mixture was washed with 3N HCl (aq.) and brine, dried over anhydrous  $\text{Na}_2\text{SO}_4$ , filtered, and concentrated under reduced pressure. The residue was used directly without purification. Then, the similar procedure according to **L21** was carried out to give **L22** (0.18 g, 9% overall yield) as white solid.

**4-(Trifluoromethyl)benzyl (S)-(1-(methoxyamino)-1-oxo-3-phenylpropan-2-yl)carbamate (Tfz-Phe-NHOMe, L22)**

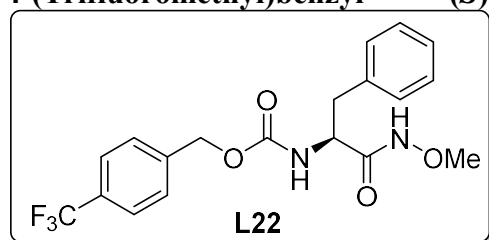

$^1\text{H}$  NMR (400 MHz,  $\text{CDCl}_3$ )  $\delta$  8.77 (s, 1H), 7.59 (d,  $J = 8.1$  Hz, 2H), 7.37 (d,  $J = 7.9$  Hz, 2H), 7.33 – 7.22 (m, 3H), 7.20 (d,  $J = 6.8$  Hz, 2H), 5.59 (s, 1H), 5.12 (d,  $J = 12.9$  Hz, 1H), 5.06 (d,  $J = 12.9$  Hz, 1H), 4.28 (dd,  $J = 15.2, 7.5$  Hz, 1H), 3.59 (s, 3H), 3.06 (d,  $J = 7.3$  Hz, 2H).  $^{13}\text{C}$  NMR (100 MHz,  $\text{Acetone-d}_6$ )  $\delta$  168.7, 156.5, 142.9, 138.3, 130.3, 130.0 (q,  $J = 32.3$  Hz), 129.1, 128.6, 127.4, 126.1 (q,  $J = 3.9$  Hz), 125.3 (q,  $J = 347.9$  Hz), 65.7, 63.9, 55.2, 38.9. HRMS (ESI)  $m/z$ :  $[\text{M} + \text{H}]^+$  Calcd for  $\text{C}_{19}\text{H}_{20}\text{O}_4\text{N}_2\text{F}_3$  397.1370; Found 397.1386.  $[\alpha]_{\text{D}}^{20} = -9.6^\circ$  ( $c$  1.0,  $\text{CHCl}_3$ ).

**General procedure of synthesis of substrates (1a, 1b, 1e, 1g, 1i-k, 1n, 1r, 1s)<sup>6</sup>**

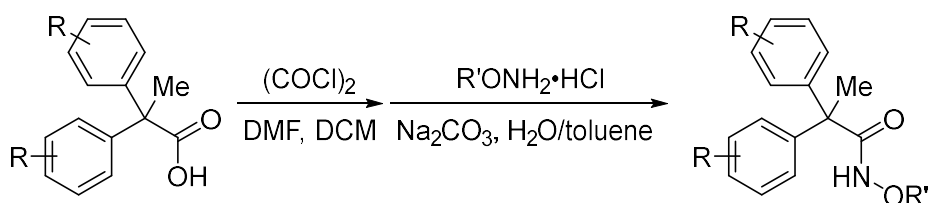

To a solution of diarylacetic acid (10 mmol) in dry DCM (20 mL), DMF (150  $\mu\text{L}$ , 2 mmol, 0.2 equiv.) and oxalyl dichloride (1.7 mL, 20 mmol, 2.0 equiv.) was added successively in an ice-bath. The reaction mixture was stirred at room temperature for 3 h, and then concentrated in vacuo. The residue was dissolved in toluene (15 mL), *O*-alkyl hydroxylamine hydrochloride (11 mmol, 1.1 equiv.), which was added to a solution of  $\text{Na}_2\text{CO}_3$  (2.12 g, 20 mmol, 2.0 equiv.) in toluene/ $\text{H}_2\text{O}$  (50 mL, v/v = 1:1) slowly at 0  $^\circ\text{C}$ . The resulting mixture was stirred at room temperature overnight. The mixture was extracted with EtOAc for three times, and the combined organic phase was washed with brine, dried over anhydrous  $\text{Na}_2\text{SO}_4$ , filtered, and concentrated under reduced pressure.

The residue was purified by column chromatography on silica gel (petroleum ether/acetone = 4:1 to 5:2) to give the *N*-alkoxy amide as white to pale yellow solid.

***N*-methoxy-2,2-diphenylpropanamide (1a)**

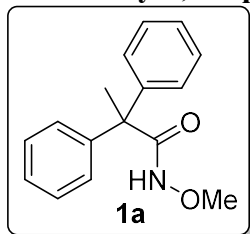

2.40 g (94% yield).  $^1\text{H}$  NMR (400 MHz,  $\text{CDCl}_3$ )  $\delta$  7.94 (s, 1H), 7.38 – 7.20 (m, 10H), 3.75 (s, 3H), 2.01 (s, 3H).  $^{13}\text{C}$  NMR (100 MHz,  $\text{CDCl}_3$ )  $\delta$  172.9, 144.0, 128.8, 128.1, 127.4, 64.5, 55.6, 27.0. HRMS (ESI)  $m/z$ :  $[\text{M} + \text{H}]^+$  Calcd for  $\text{C}_{16}\text{H}_{18}\text{O}_2\text{N}$  256.1332; Found 256.1335.

***N*-methoxy-2,2-di-*p*-tolylpropanamide(1b)**

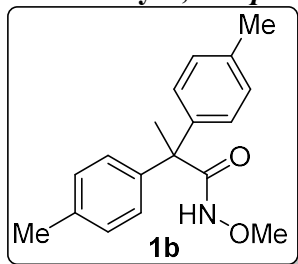

2.57 g (91% yield).  $^1\text{H}$  NMR (400 MHz,  $\text{CDCl}_3$ )  $\delta$  7.95 (s, 1H), 7.12 (s, 8H), 3.74 (s, 3H), 2.34 (s, 6H), 1.97 (s, 3H).  $^{13}\text{C}$  NMR (100 MHz,  $\text{CDCl}_3$ )  $\delta$  173.3, 141.2, 137.0, 129.4, 128.0, 64.4, 54.9, 27.0, 21.1. HRMS (ESI)  $m/z$ :  $[\text{M} + \text{H}]^+$  Calcd for  $\text{C}_{18}\text{H}_{22}\text{O}_2\text{N}$  284.1645; Found 284.1645.

**2,2-Bis(4-methoxyphenyl)-*N*-methoxypropanamide (1e)**

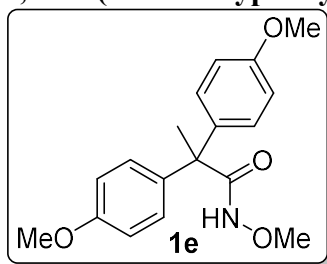

2.74 g (87% yield).  $^1\text{H}$  NMR (400 MHz,  $\text{CDCl}_3$ )  $\delta$  7.94 (s, 1H), 7.15 (d,  $J$  = 8.7 Hz, 4H), 6.85 (d,  $J$  = 8.8 Hz, 4H), 3.80 (s, 6H), 3.75 (s, 3H), 1.96 (s, 3H).  $^{13}\text{C}$  NMR (100 MHz,  $\text{CDCl}_3$ )  $\delta$  173.5, 158.7, 136.3, 129.2, 114.0, 64.4, 55.4, 27.2. HRMS (ESI)  $m/z$ :  $[\text{M} + \text{H}]^+$  Calcd for  $\text{C}_{18}\text{H}_{22}\text{O}_4\text{N}$  316.1543; Found 316.1545.

***N*-methoxy-2,2-di-*m*-tolylpropanamide(1g)**

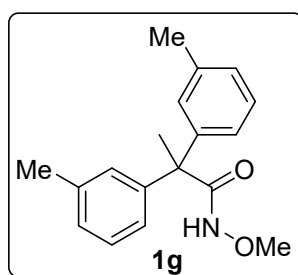

2.32 g (82% yield).  $^1\text{H}$  NMR (400 MHz,  $\text{CDCl}_3$ )  $\delta$  7.96 (s, 1H), 7.21 (t,  $J$  = 7.6 Hz, 2H), 7.09 (d,  $J$  = 7.5 Hz, 2H), 7.06 (s, 2H), 7.00 (d,  $J$  = 7.7 Hz, 2H), 3.75 (s, 3H), 2.32 (s, 6H), 1.98 (s, 3H).  $^{13}\text{C}$  NMR (100 MHz,  $\text{CDCl}_3$ )  $\delta$  173.2, 144.1, 138.3, 128.7, 128.6, 128.1, 125.3, 64.4, 55.4, 27.0, 21.8.

HRMS (ESI)  $m/z$ :  $[\text{M} + \text{H}]^+$  Calcd for  $\text{C}_{18}\text{H}_{22}\text{O}_2\text{N}$  284.1645; Found 284.1646.

**2,2-Bis(3,4-dimethylphenyl)-*N*-methoxypropanamide (1i)**

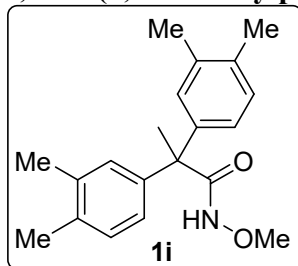

2.76 g (89% yield).  $^1\text{H}$  NMR (400 MHz,  $\text{CDCl}_3$ )  $\delta$  7.98 (s, 1H), 7.07 (d,  $J$  = 7.9 Hz, 2H), 7.01 (s, 2H), 6.93 (d,  $J$  = 7.7 Hz, 2H), 3.75 (s, 3H), 2.25 (s, 6H), 2.23 (s, 6H), 1.95 (s, 3H).  $^{13}\text{C}$  NMR (100 MHz,  $\text{CDCl}_3$ )  $\delta$  173.5, 141.6, 136.8, 135.6,

129.9, 129.2, 125.6, 64.4, 54.8, 27.1, 20.2, 19.5. HRMS (ESI)  $m/z$ :  $[M + H]^+$  Calcd for  $C_{20}H_{26}O_2N$  312.1958; Found 312.1963.

**2,2-Bis(4-methoxy-3-methylphenyl)-*N*-methoxypropanamide (1j)**

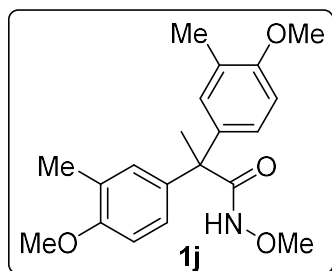

2.88 g (84% yield).  $^1H$  NMR (400 MHz,  $CDCl_3$ )  $\delta$  7.97 (s, 1H), 7.04 – 6.96 (m, 4H), 6.79 – 6.72 (m, 2H), 3.82 (s, 6H), 3.75 (s, 3H), 2.18 (s, 6H), 1.94 (s, 3H).  $^{13}C$  NMR (100 MHz,  $CDCl_3$ )  $\delta$  173.8, 156.8, 135.9, 130.3, 126.7, 126.5, 109.8, 64.4, 55.5, 54.2, 27.2, 16.6. HRMS (ESI)  $m/z$ :  $[M$

$+ H]^+$  Calcd for  $C_{20}H_{26}O_4N$  344.1856; Found 344.1870.

**2,2-Bis(3-chloro-4-methoxyphenyl)-*N*-methoxypropanamide (1k)**

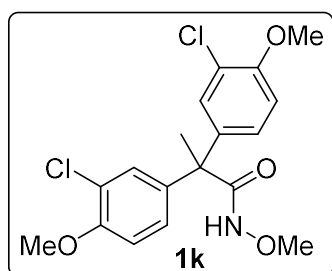

2.98 g (78% yield).  $^1H$  NMR (400 MHz,  $CDCl_3$ )  $\delta$  7.96 (s, 1H), 7.23 (d,  $J = 2.4$  Hz, 2H), 7.08 (dd,  $J = 8.6, 2.4$  Hz, 2H), 6.89 (d,  $J = 8.7$  Hz, 2H), 3.91 (s, 6H), 3.76 (s, 3H), 1.94 (s, 3H).  $^{13}C$  NMR (100 MHz,  $CDCl_3$ )  $\delta$  172.4, 154.3, 136.6, 129.8, 127.5, 122.8, 112.1, 64.5, 56.3, 54.0, 27.1.

HRMS (ESI)  $m/z$ :  $[M + H]^+$  Calcd for  $C_{18}H_{20}O_4NCl_2$  384.0764; Found 384.0779.

***N*-methoxy-2,2-diphenylbutanamide (1n)**

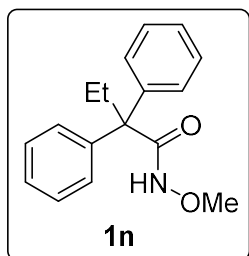

2.47 g (92% yield).  $^1H$  NMR (400 MHz,  $CDCl_3$ )  $\delta$  8.01 (s, 1H), 7.38 – 7.21 (m, 10H), 3.68 (s, 3H), 2.47 (q,  $J = 7.3$  Hz, 2H), 0.88 (t,  $J = 7.3$  Hz, 3H).  $^{13}C$  NMR (100 MHz,  $CDCl_3$ )  $\delta$  172.6, 142.3, 129.0, 128.5, 127.2, 64.2, 59.5, 31.7, 10.0. HRMS (ESI)  $m/z$ :  $[M$

$+ H]^+$  Calcd for  $C_{17}H_{20}O_2N$  270.1489; Found 270.1489.

***N*-ethoxy-2,2-diphenylpropanamide (1r)**

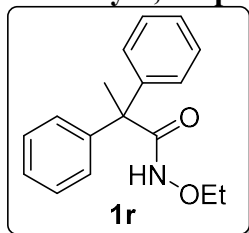

2.42 g (90% yield).  $^1H$  NMR (400 MHz,  $CDCl_3$ )  $\delta$  7.89 (s, 1H), 7.36 – 7.21 (m, 10H), 3.95 (q,  $J = 7.0$  Hz, 2H), 2.01 (s, 3H), 1.21 (t,  $J = 7.1$  Hz, 3H).  $^{13}C$  NMR (100 MHz,  $CDCl_3$ )  $\delta$  172.9, 144.1, 128.7, 128.1, 127.3, 72.2, 55.7, 27.1, 13.5. HRMS (ESI)  $m/z$ :  $[M$

$+ H]^+$  Calcd for  $C_{17}H_{20}O_2N$  270.1489; Found 270.1490.

***N*-(benzyloxy)-2,2-diphenylpropanamide (1s)**

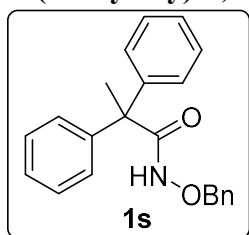

1.81 g (74% yield).  $^1H$  NMR (400 MHz,  $CDCl_3$ )  $\delta$  7.77 (s, 1H), 7.34 – 7.22 (m, 11H), 7.18 – 7.12 (m, 4H), 4.89 (s, 2H), 1.98 (s, 3H).  $^{13}C$  NMR (100 MHz,  $CDCl_3$ )  $\delta$  172.6, 144.0, 135.1, 129.5, 128.9, 128.7 (2C), 128.1, 127.3, 78.2, 55.7, 27.0. HRMS (ESI)

$m/z$ :  $[M + H]^+$  Calcd for  $C_{22}H_{22}O_2N$  332.1645; Found 332.1647.

## General procedure of synthesis of substrates (1c, 1d, 1l)<sup>1</sup>

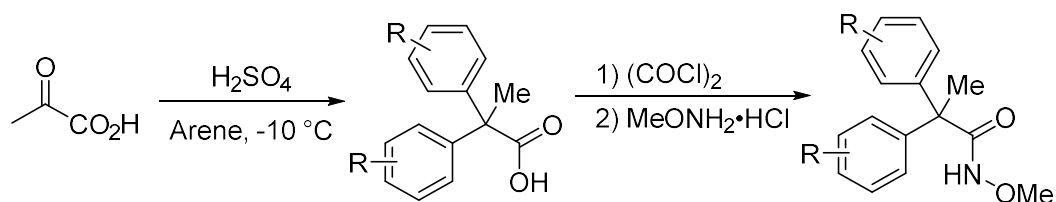

At  $-10\text{ }^\circ\text{C}$ , conc.  $\text{H}_2\text{SO}_4$  (15.4 mL) was added to pyruvic acid (1.34 mL, 19.3 mmol) slowly. Arene (60 mmol, 3.0 equiv.) was added in one pot. The solution was stirred vigorously for 3 h., quenched with ice, and extracted with  $\text{Et}_2\text{O}$ . The combined organic phase was dried over anhydrous  $\text{Na}_2\text{SO}_4$ , filtered, and concentrated. The crude acid was purified by flash column chromatography (petroleum ether/ $\text{EtOAc}$  = 10:1 to petroleum ether/acetone = 4:1). Then, the similar amidations according to **1a** was carried out to give the corresponding substrates.

### 2,2-Bis(4-ethylphenyl)-*N*-methoxypropanamide (1c)

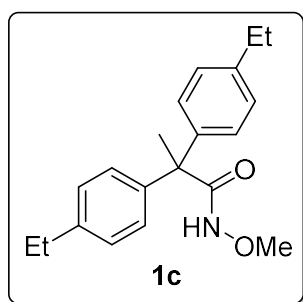

1.62 g (27% overall yield).  $^1\text{H}$  NMR (400 MHz,  $\text{CDCl}_3$ )  $\delta$  7.97 (d,  $J$  = 9.9 Hz, 1H), 7.15 (s, 8H), 3.75 (s, 3H), 2.64 (q,  $J$  = 7.6 Hz, 4H), 1.98 (s, 3H), 1.24 (t,  $J$  = 7.6 Hz, 6H).  $^{13}\text{C}$  NMR (100 MHz,  $\text{CDCl}_3$ )  $\delta$  173.4, 143.2, 141.4, 128.2, 128.0, 64.4, 55.0, 28.5, 27.0, 15.5. HRMS (ESI)  $m/z$ :  $[\text{M} + \text{H}]^+$  Calcd for  $\text{C}_{20}\text{H}_{26}\text{O}_2\text{N}$  312.1958; Found 312.1971.

### 2,2-Bis(4-butylphenyl)-*N*-methoxypropanamide (1d)

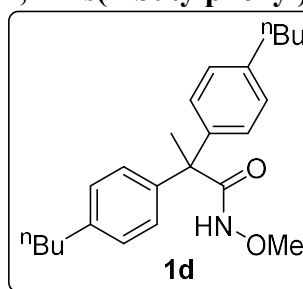

1.20 g (17% overall yield).  $^1\text{H}$  NMR (400 MHz,  $\text{CDCl}_3$ )  $\delta$  7.94 (s, 1H), 7.13 (s, 8H), 3.75 (s, 3H), 2.75 – 2.49 (m, 4H), 1.98 (s, 3H), 1.73 – 1.50 (m, 4H), 1.48 – 1.28 (m, 4H), 0.93 (t,  $J$  = 7.3 Hz, 6H).  $^{13}\text{C}$  NMR (100 MHz,  $\text{CDCl}_3$ )  $\delta$  173.4, 142.0, 141.3, 128.7, 127.9, 64.4, 55.0, 35.3, 33.6, 27.0, 22.6, 14.1. HRMS (ESI)  $m/z$ :  $[\text{M} + \text{H}]^+$  Calcd for  $\text{C}_{24}\text{H}_{34}\text{O}_2\text{N}$  368.2584; Found 368.2597.

### 2,2-Bis(2,3-dihydro-1*H*-inden-5-yl)-*N*-methoxypropanamide (1l)

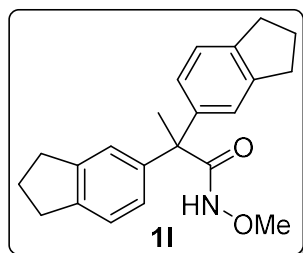

2.13 g (33% overall yield).  $^1\text{H}$  NMR (400 MHz,  $\text{CDCl}_3$ )  $\delta$  8.00 (s, 1H), 7.16 (d,  $J$  = 7.9 Hz, 2H), 7.11 (s, 2H), 6.99 (d,  $J$  = 8.0 Hz, 2H), 3.75 (s, 3H), 2.88 (q,  $J$  = 7.7 Hz, 8H), 2.16 – 2.02 (m, 4H), 1.98 (s, 3H).  $^{13}\text{C}$  NMR (100 MHz,  $\text{CDCl}_3$ )  $\delta$  173.7, 144.8, 143.2, 142.3, 126.1, 124.4, 124.0, 64.4, 55.3,

33.1, 32.6, 27.4, 25.6. HRMS (ESI)  $m/z$ :  $[\text{M} + \text{H}]^+$  Calcd for  $\text{C}_{22}\text{H}_{26}\text{O}_2\text{N}$  336.1958; Found 336.1971.

## General procedure of synthesis of substrate (1m)<sup>2</sup>

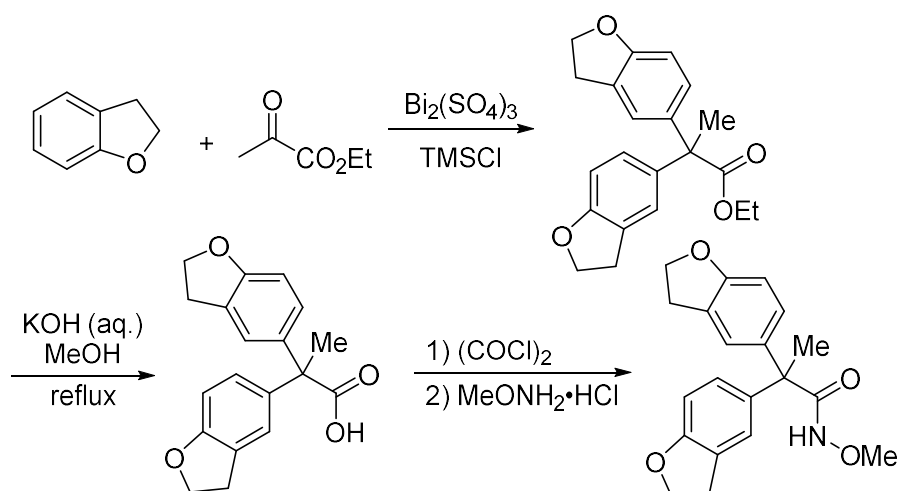

To a mixture of TMSCl (13.0 mL, 100 mmol, 2.0 equiv.), dihydrobenzofuran (16.9 mL, 150 mmol, 3.0 equiv.), ethyl pyruvate (6.1 mL, 50 mmol),  $\text{Bi}_2(\text{SO}_4)_3$  (3.5 g, 5 mmol, 10 mol%) was added in portions. The mixture was stirred at room temperature overnight vigorously. Silica gel was added after completing the reaction, and the volatile was evaporated, then the residue was purified by flash column chromatography (petroleum ether/EtOAc = 15:1 to 4:1). The ester (20 mmol) was dissolved in MeOH (11.2 mL), and was added 11.2 mL 20% KOH (aq.). The resulting solution was refluxed in an oil bath for 24 h. After that, the mixture was cooled to 0 °C, acidified using 4N HCl, and extracted with  $\text{Et}_2\text{O}$ . The organic phase was dried over anhydrous  $\text{Na}_2\text{SO}_4$ . After filtration and concentration, the acid, without further purification, was used in the similar amidation according to **1a** to give **1m** (2.44 g, 36% overall yield) as white solid.

## 2,2-Bis(2,3-dihydrobenzofuran-5-yl)-N-methoxypropanamide (1m)

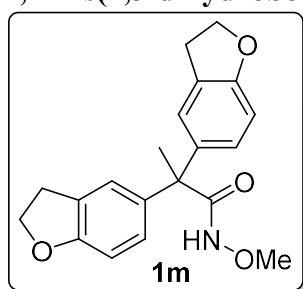

$^1\text{H}$  NMR (400 MHz,  $\text{CDCl}_3$ )  $\delta$  8.01 (s, 1H), 7.06 (s, 2H), 6.96 (d,  $J$  = 8.4 Hz, 2H), 6.72 (d,  $J$  = 8.4 Hz, 2H), 4.58 (t,  $J$  = 8.7 Hz, 4H), 3.76 (s, 3H), 3.18 (t,  $J$  = 8.7 Hz, 4H), 1.94 (s, 3H).  $^{13}\text{C}$  NMR (100 MHz,  $\text{CDCl}_3$ )  $\delta$  173.9, 159.2, 136.5, 127.9, 127.5, 124.7, 109.2, 71.6, 64.4, 54.6, 29.9, 27.5. HRMS (ESI)

$m/z$ :  $[\text{M} + \text{H}]^+$  Calcd for  $\text{C}_{20}\text{H}_{22}\text{O}_4\text{N}$  340.1543; Found 340.1559.

## General procedure of synthesis of substrates (1f, 1o-q)<sup>7</sup>

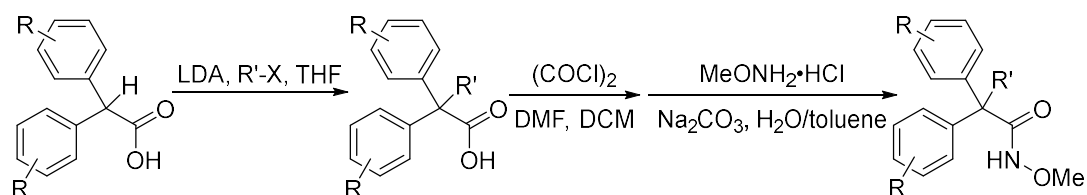

To a solution of diphenylacetic acid (2.12 g, 10 mmol) (2.48 g of bis(4-fluorophenyl)acetic acid<sup>8</sup> for **1f**) in dried THF (10 mL) was added LDA (2.0 M in THF, 11 mL, 22 mmol) under N<sub>2</sub> atmosphere in an ice-bath. The solution was stirred at room temperature for 4 h. After cooling the reaction mixture again to 0 °C, alkyl halide (15 mmol) was added dropwise. The reaction was stirred overnight at room temperature, quenched by 4N HCl at 0 °C and then diluted with Et<sub>2</sub>O. The phases were separated and the aqueous phase was extracted with Et<sub>2</sub>O (3 times). The organic layers were combined, washed with brine, dried over anhydrous Na<sub>2</sub>SO<sub>4</sub>. After filtration and concentration, the crude acid was purified by flash column chromatography (petroleum ether/EtOAc = 10:1 to petroleum ether/acetone = 4:1). Then, the similar amidations according to **1a** was carried out to give the corresponding substrates as white solid.

**2,2-Bis(4-fluorophenyl)-N-methoxypropanamide(**1f**)**

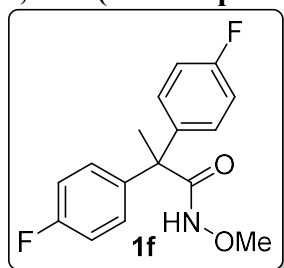

1.80 g (62% overall yield). <sup>1</sup>H NMR (400 MHz, CDCl<sub>3</sub>) δ 7.96 (d, *J* = 5.4 Hz, 1H), 7.20 (dd, *J* = 8.7, 5.2 Hz, 4H), 7.03 (t, *J* = 8.6 Hz, 4H), 3.75 (s, 3H), 1.98 (s, 3H). <sup>13</sup>C NMR (100 MHz, CDCl<sub>3</sub>) δ 172.6, 162.0 (d, *J* = 247.6 Hz), 139.6 (d, *J* = 3.3 Hz), 129.8 (d, *J* = 8.0 Hz), 115.7 (d, *J* = 21.3 Hz), 64.5, 54.5, 27.4.

HRMS (ESI) *m/z*: [M + H]<sup>+</sup> Calcd for C<sub>16</sub>H<sub>16</sub>O<sub>2</sub>NF<sub>2</sub> 292.1144; Found 292.1145.

**N-methoxy-5-methyl-2,2-diphenylhexanamide (**1o**)**

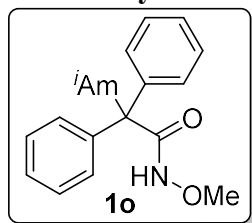

1.99 g (64% overall yield). <sup>1</sup>H NMR (400 MHz, CDCl<sub>3</sub>) δ 7.97 (s, 1H), 7.39 – 7.15 (m, 10H), 3.69 (s, 3H), 2.45 – 2.34 (m, 2H), 1.57 – 1.45 (m, 1H), 1.18 – 1.06 (m, 2H), 0.85 (d, *J* = 6.6 Hz, 6H). <sup>13</sup>C NMR (100 MHz, CDCl<sub>3</sub>) δ 172.7, 142.6, 128.9, 128.6,

127.2, 64.3, 59.2, 37.0, 34.0, 28.8, 22.7. HRMS (ESI) *m/z*: [M + H]<sup>+</sup> Calcd for C<sub>20</sub>H<sub>26</sub>O<sub>2</sub>N 312.1958; Found 312.1960.

**N-methoxy-4-methyl-2,2-diphenylpentanamide (**1p**)**

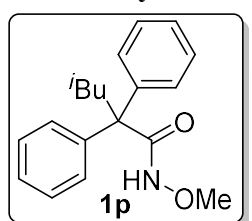

1.25 g (42% overall yield). <sup>1</sup>H NMR (400 MHz, CDCl<sub>3</sub>) δ 8.05 (s, 1H), 7.41 – 7.22 (m, 10H), 3.64 (s, 3H), 2.34 (d, *J* = 5.1 Hz, 2H), 1.68 – 1.58 (m, 1H), 0.70 (d, *J* = 6.7 Hz, 6H). <sup>13</sup>C NMR (100 MHz, CDCl<sub>3</sub>) δ 172.7, 142.8, 129.1, 128.4, 127.2, 64.1, 59.5, 47.3,

25.1, 24.7. HRMS (ESI) *m/z*: [M + H]<sup>+</sup> Calcd for C<sub>19</sub>H<sub>24</sub>O<sub>2</sub>N 298.1802; Found 298.1803.

### 3-Ethoxy-*N*-methoxy-2,2-diphenylpropanamide (1q)

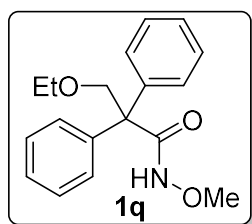

2.12 g (71% overall yield).  $^1\text{H}$  NMR (400 MHz,  $\text{CDCl}_3$ )  $\delta$  9.52 (s, 1H), 7.34 – 7.30 (m, 2H), 7.30 – 7.27 (m, 3H), 7.26 – 7.21 (m, 5H), 4.09 (s, 2H), 3.78 (s, 3H), 3.63 (q,  $J$  = 7.0 Hz, 2H), 1.24 (t,  $J$  = 7.0 Hz, 3H).  $^{13}\text{C}$  NMR (100 MHz,  $\text{CDCl}_3$ )  $\delta$  171.6, 140.9, 128.9, 128.4, 127.4, 74.9, 67.4, 64.2, 60.2, 15.1. HRMS (ESI)  $m/z$ :  $[\text{M} + \text{H}]^+$  Calcd for  $\text{C}_{18}\text{H}_{22}\text{O}_3\text{N}$  300.1594; Found 300.1596.

### Synthesis of 1h<sup>7</sup>

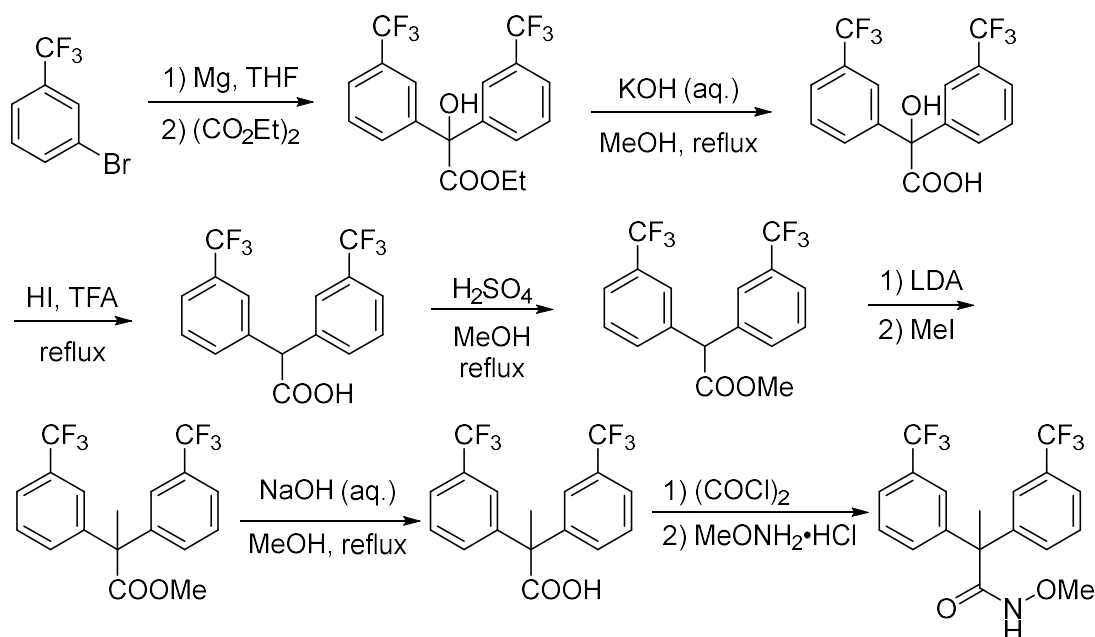

To a solution of diethyl oxalate (8.13 mL, 60 mmol) in dried THF (60 mL) was added 3-trifluoromethylphenylmagnesium bromide (132 mmol, 2.2 equiv., synthesized from 18.48 mL 3-trifluoromethylphenyl bromide and 3.35 g magnesium in 90 mL dried THF) dropwise at  $-78\text{ }^{\circ}\text{C}$ , and then warmed to room temperature. After stirring overnight, the reaction was quenched with saturated  $\text{NH}_4\text{Cl}$  (aq.) at  $-10\text{ }^{\circ}\text{C}$ , and stirred for another 10 min. The mixture was extracted with DCM for three times, and the combined organic phase was dried over anhydrous  $\text{Na}_2\text{SO}_4$ , filtered, and concentrated. The residue was purified by flash column chromatography (petroleum ether/ $\text{EtOAc}$  = 5:1) to give the ethyl benzilate (22.57 g, 57.5 mmol, 96% yield). The ester was dissolved in MeOH (57 mL), and the solution refluxed in an oil bath overnight after 2.5 M KOH (57 mL) was added. The reaction was cooled to  $0\text{ }^{\circ}\text{C}$  and then acidified using 4N HCl. The mixture was extracted with  $\text{Et}_2\text{O}$ . The organic phase was dried over anhydrous  $\text{Na}_2\text{SO}_4$ . After



filtration and concentration, the crude acid was purified by flash column chromatography (DCM/MeOH = 50:1) to give the pure acid (20.04 g, 96% yield). The benzoic acid (12 g, 33 mmol) was dissolved in TFA (110 mL), and heated to reflux in an oil bath, then 57% HI (aq., 48 mL) was added dropwise. The solution was cooled to room temperature 5 h later, and most of the volatile was evaporated. The residue was diluted with water, added 30% NaOH (aq.) to adjust pH < 3 in an ice bath, extracted with EtOAc for three times. The combined organic phase was dried over anhydrous Na<sub>2</sub>SO<sub>4</sub>, filtered, concentrated. The crude acid was purified by flash column chromatography (petroleum ether/acetone = 6:1, 7.04 g, 61% yield).

To a solution of diarylacetic acid (6.96 g, 20 mmol) in MeOH (33 mL) was added conc. H<sub>2</sub>SO<sub>4</sub> (55.6  $\mu$ L, 1 mmol, 0.05 equiv.) dropwise in an ice-bath, then refluxed overnight. After cooling to room temperature, saturated NaHCO<sub>3</sub> was added, and then extracted by EtOAc three times. The combined organic phase was dried over anhydrous Na<sub>2</sub>SO<sub>4</sub>, filtered, concentrated. The residue was dissolved in dried THF (20 mL) under N<sub>2</sub>, and then LDA (15 mL, 2.0 M in THF, 1.5 equiv.) was added at -78 °C. The solution was stirred for another 12 h, and iodomethane (2.5 mL, 40 mmol, 2.0 equiv.) was added dropwise. The reaction was stirred at room temperature overnight. The mixture was quenched by water at -40 °C and extracted with EtOAc (3 times). The organic layers were combined, washed with brine, dried over anhydrous Na<sub>2</sub>SO<sub>4</sub>. After filtration and concentration, the crude ester was dissolved in MeOH (20 mL), and the solution refluxed overnight after 20% NaOH (20 mL) was added. The reaction was cooled to 0 °C and then acidified using 4N HCl. The mixture was extracted with Et<sub>2</sub>O. The organic phase was dried over anhydrous Na<sub>2</sub>SO<sub>4</sub>. After filtration and concentration, the crude acid was purified by flash column chromatography (petroleum ether/EtOAc = 10:1 to petroleum ether/acetone = 5:1, 4.20 g, 59% yield). Then, the similar amidation according to **1a** was carried out to give **1h** (3.10 g, 68% yield) as pale yellow solid.

### 2,2-bis(3-(trifluoromethyl)phenyl)-N-methoxypropanamide (**1h**)

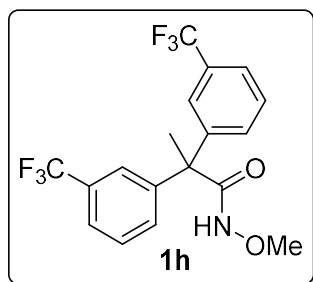

<sup>1</sup>H NMR (400 MHz, CDCl<sub>3</sub>)  $\delta$  8.09 (s, 1H), 7.59 (d, *J* = 7.7 Hz, 2H), 7.51 (s, 2H), 7.48 (t, *J* = 7.8 Hz, 2H), 7.40 (d, *J* = 8.0 Hz, 2H), 3.75 (s, 3H), 2.04 (s, 3H). <sup>13</sup>C NMR (100 MHz, CDCl<sub>3</sub>)  $\delta$  171.5, 144.2, 131.7, 131.4 (q, *J* = 32.4 Hz), 129.5, 124.8 (q, *J* = 3.7 Hz), 124.6 (q, *J* = 3.8 Hz), 123.9 (q, *J* = 272.6 Hz), 64.5, 55.5, 27.0. HRMS (ESI) *m/z*: [M + H]<sup>+</sup> Calcd for C<sub>18</sub>H<sub>16</sub>O<sub>2</sub>NF<sub>6</sub> 392.1080; Found 392.1082.

## Pd(II)-Catalyzed enantioselective C(sp<sup>2</sup>)-H amination

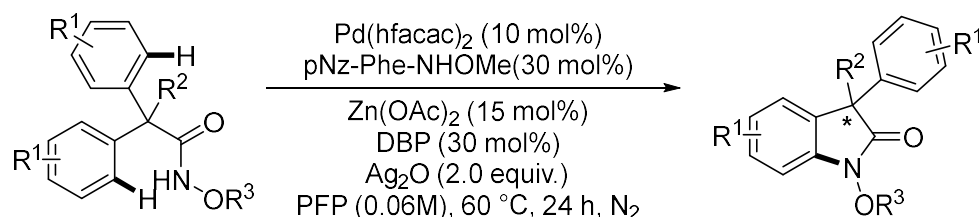

In a 25 mL Schlenk tube, 2.5 mL pentafluoropropanol was added to a mixture of diarylamide **1** (0.15 mmol), Pd(hfacac)<sub>2</sub> (7.8 mg, 0.015 mmol, 10 mol%), pNz-Phe-NHOMe (16.8 mg, 0.045 mmol, 30 mol%), Zn(OAc)<sub>2</sub> (4.1 mg, 0.0225 mmol, 15 mol%), dibenzyl phosphate (12.5 mg, 0.045 mmol, 30 mol%) and Ag<sub>2</sub>O (69.5 mg, 0.3 mmol, 2.0 equiv.) under N<sub>2</sub>. The tube was sealed with a Teflon lined cap and the reaction mixture was stirred at 60 °C in a preheating oil bath for 24 h. After cooling to room temperature, the mixture was concentrated under vacuum and the residue was purified by column chromatography on silica gel (petroleum ether/acetone = 7:1 to 5:1) to give the chiral lactams as white to pale yellow solid.

Preparation procedure of racemic products was shown as follows:

In a 25 mL Schlenk tube, 1.0 mL trifluoroethanol was added to a mixture of diarylamide **1** (0.1 mmol), Pd(OAc)<sub>2</sub> (2.2 mg, 0.01 mmol, 10 mol%), Cbz-Gly-NHOMe (7.1 mg, 0.03 mmol, 30 mol%), and Ag<sub>2</sub>O (46.4 mg, 0.2 mmol, 2.0 equiv.) under N<sub>2</sub>. The following procedure was the same as the enantioselective approach.

### 1-Methoxy-3-methyl-3-phenylindolin-2-one (**2a**)

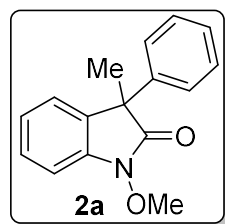

36.2 mg (95% yield), 240.0 mg (94% yield for 1 mmol scale reaction in 100 mL Schlenk tube). <sup>1</sup>H NMR (400 MHz, CDCl<sub>3</sub>) δ 7.34 (td, *J* = 7.7, 1.2 Hz, 1H), 7.32 – 7.22 (m, 5H), 7.19 (d, *J* = 6.7 Hz, 1H), 7.11 (td, *J* = 7.5, 1.0 Hz, 1H), 7.07 (d, *J* = 7.8 Hz, 1H), 4.02 (s, 3H), 1.80 (s, 3H). <sup>13</sup>C NMR (100 MHz, CDCl<sub>3</sub>) δ 174.1, 140.0, 139.6, 131.4, 128.8, 128.4, 127.6, 126.7, 124.6, 123.5, 107.7, 63.6, 51.0, 23.6. HRMS (ESI) *m/z*: [M + H]<sup>+</sup> Calcd for C<sub>16</sub>H<sub>16</sub>O<sub>2</sub>N 254.1176; Found 254.1178. [α]<sub>D</sub><sup>20</sup> = +101.4° (*c* 1.0, CHCl<sub>3</sub>). Enantiomeric excess: 95%, determined by HPLC (Chiralpak-AD-H, hexane/isopropanol = 90/10, flow rate 1.0 mL/min, T = 25 °C, 254 nm): *t*<sub>R</sub> = 6.940 min (minor), *t*<sub>R</sub> = 9.382 min (major).

### 1-Methoxy-3,6-dimethyl-3-(p-tolyl)indolin-2-one (2b)

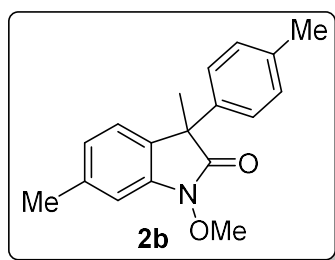

32.4 mg (77% yield).  $^1\text{H}$  NMR (400 MHz,  $\text{CDCl}_3$ )  $\delta$  7.19 (d,  $J = 8.3$  Hz, 2H), 7.10 (d,  $J = 8.0$  Hz, 2H), 7.06 (d,  $J = 7.5$  Hz, 1H), 6.91 (d,  $J = 7.5$  Hz, 1H), 6.89 (s, 1H), 4.00 (s, 3H), 2.42 (s, 3H), 2.30 (s, 3H), 1.76 (s, 3H).  $^{13}\text{C}$  NMR (100 MHz,  $\text{CDCl}_3$ )  $\delta$  174.5, 139.6, 138.6, 137.3, 137.2, 129.4, 128.6, 126.6, 124.3, 124.0, 108.4, 63.5, 50.4, 23.7, 21.9, 21.1. HRMS (ESI)  $m/z$ :  $[\text{M} + \text{H}]^+$  Calcd for  $\text{C}_{18}\text{H}_{20}\text{O}_2\text{N}$  282.1489; Found 282.1491.  $[\alpha]_{\text{D}}^{20} = +94.0^\circ$  ( $c$  1.0,  $\text{CHCl}_3$ ). Enantiomeric excess: 93%, determined by HPLC (Chiralpak-AD-H, hexane/isopropanol = 90/10, flow rate 1.0 mL/min,  $T = 25^\circ\text{C}$ , 254 nm):  $t_{\text{R}} = 10.335$  min (minor),  $t_{\text{R}} = 11.668$  min (major).

### 6-Ethyl-3-(4-ethylphenyl)-1-methoxy-3-methylindolin-2-one (2c)

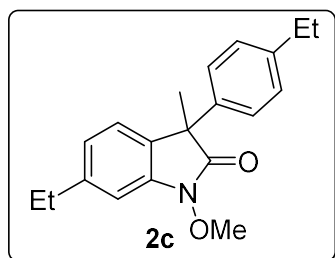

33.7 mg (73% yield).  $^1\text{H}$  NMR (400 MHz,  $\text{CDCl}_3$ )  $\delta$  7.23 (d,  $J = 8.3$  Hz, 2H), 7.13 (d,  $J = 8.3$  Hz, 2H), 7.09 (d,  $J = 7.6$  Hz, 1H), 6.94 (d,  $J = 7.6$  Hz, 1H), 6.91 (s, 1H), 4.02 (s, 3H), 2.71 (q,  $J = 7.6$  Hz, 2H), 2.60 (q,  $J = 7.6$  Hz, 2H), 1.77 (s, 3H), 1.29 (t,  $J = 7.6$  Hz, 3H), 1.20 (t,  $J = 7.6$  Hz, 3H).  $^{13}\text{C}$  NMR (100 MHz,  $\text{CDCl}_3$ )  $\delta$  174.6, 145.1, 143.4, 139.6, 137.5, 128.8, 128.2, 126.6, 124.4, 122.8, 107.2, 63.6, 50.5, 29.2, 28.5, 23.7, 15.7, 15.6. HRMS (ESI)  $m/z$ :  $[\text{M} + \text{H}]^+$  Calcd for  $\text{C}_{20}\text{H}_{24}\text{O}_2\text{N}$  310.1802; Found 310.1817.  $[\alpha]_{\text{D}}^{20} = +77.2^\circ$  ( $c$  1.0,  $\text{CHCl}_3$ ). Enantiomeric excess: 93%, determined by HPLC (Chiralpak-AD-H, hexane/isopropanol = 90/10, flow rate 1.0 mL/min,  $T = 25^\circ\text{C}$ , 254 nm):  $t_{\text{R}} = 9.599$  min (major),  $t_{\text{R}} = 10.931$  min (minor).

### 6-Butyl-3-(4-butylphenyl)-1-methoxy-3-methylindolin-2-one (2d)

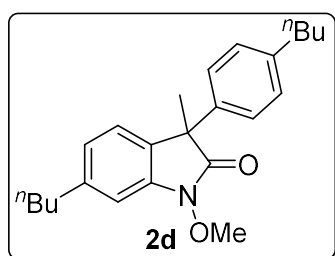

34.3 mg (63% yield).  $^1\text{H}$  NMR (400 MHz,  $\text{CDCl}_3$ )  $\delta$  7.24 – 7.19 (m, 2H), 7.14 – 7.05 (m, 3H), 6.92 (d,  $J = 7.6$  Hz, 1H), 6.89 (s, 1H), 4.02 (s, 3H), 2.71 – 2.63 (m, 2H), 2.59 – 2.51 (m, 2H), 1.77 (s, 3H), 1.69 – 1.60 (m, 2H), 1.60 – 1.50 (m, 2H), 1.41 (dt,  $J = 14.9, 7.4$  Hz, 2H), 1.32 (dt,  $J = 14.6, 7.4$  Hz, 2H), 0.96 (t,  $J = 7.3$  Hz, 3H), 0.90 (t,  $J = 7.3$  Hz, 3H).  $^{13}\text{C}$  NMR (100 MHz,  $\text{CDCl}_3$ )  $\delta$  174.6, 143.7, 142.2, 139.6, 137.5, 128.8, 128.7, 126.5, 124.3, 123.4, 107.7, 63.6, 50.5, 36.1, 35.3, 33.8, 33.6, 23.8, 22.6, 22.5, 14.1 (2C). HRMS (ESI)  $m/z$ :  $[\text{M} + \text{H}]^+$  Calcd for  $\text{C}_{24}\text{H}_{32}\text{O}_2\text{N}$  366.2428; Found 366.2441.  $[\alpha]_{\text{D}}^{20} = +67.9^\circ$  ( $c$  1.0,  $\text{CHCl}_3$ ). Enantiomeric excess: 93%, determined by HPLC (Chiralpak-AD-H,

hexane/isopropanol = 90/10, flow rate 1.0 mL/min, T = 25 °C, 254 nm):  $t_R$  = 6.768 min (major),  $t_R$  = 7.608 min (minor).

### 1,6-Dimethoxy-3-(4-methoxyphenyl)-3-methylindolin-2-one (2e)

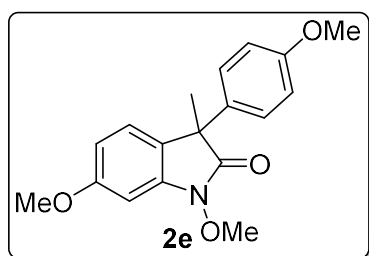

37.6 mg (80% yield).  $^1\text{H}$  NMR (400 MHz,  $\text{CDCl}_3$ )  $\delta$  7.22 (d,  $J$  = 8.9 Hz, 2H), 7.08 (d,  $J$  = 8.1 Hz, 1H), 6.83 (d,  $J$  = 8.9 Hz, 2H), 6.65 (d,  $J$  = 2.2 Hz, 1H), 6.62 (dd,  $J$  = 8.1, 2.4 Hz, 1H), 4.00 (s, 3H), 3.85 (s, 3H), 3.77 (s, 3H), 1.74 (s, 3H).  $^{13}\text{C}$  NMR (100 MHz,  $\text{CDCl}_3$ )  $\delta$  174.9, 160.4, 159.0, 140.8, 132.5, 127.8, 125.3, 123.2, 114.1, 108.0, 95.0, 63.6, 55.7, 55.4, 49.9, 24.0. HRMS (ESI)  $m/z$ :  $[\text{M} + \text{H}]^+$  Calcd for  $\text{C}_{18}\text{H}_{20}\text{O}_4\text{N}$  314.1387; Found 314.1390.  $[\alpha]_D^{20}$  = +104.6° ( $c$  1.0,  $\text{CHCl}_3$ ). Enantiomeric excess: 92%, determined by HPLC (Chiralpak-OD-H, hexane/isopropanol = 86/14, flow rate 1.0 mL/min, T = 25 °C, 254 nm):  $t_R$  = 8.337 min (minor),  $t_R$  = 10.972 min (major).

### 6-Fluoro-3-(4-fluorophenyl)-1-methoxy-3-methylindolin-2-one (2f)

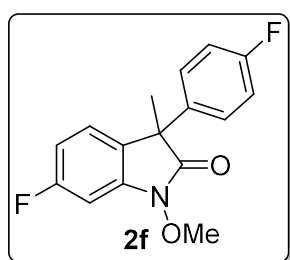

17.4 mg (40% yield) was obtained by using  $\text{Pd}(\text{OAc})_2$  (10 mol%) as catalyst without  $\text{Zn}(\text{OAc})_2$ .  $^1\text{H}$  NMR (400 MHz,  $\text{CDCl}_3$ )  $\delta$  7.31 – 7.22 (m, 2H), 7.15 – 7.09 (m, 1H), 7.00 (t,  $J$  = 8.7 Hz, 2H), 6.85 – 6.77 (m, 2H), 4.01 (s, 3H), 1.77 (s, 3H).  $^{13}\text{C}$  NMR (100 MHz,  $\text{CDCl}_3$ )  $\delta$  174.3, 164.0 (d,  $J$  = 88.1 Hz), 161.6 (d,  $J$  = 88.5 Hz), 141.1 (d,  $J$  = 11.8 Hz), 135.5, 128.4 (d,  $J$  = 8.2 Hz), 126.2 (d,  $J$  = 3.2 Hz), 125.8 (d,  $J$  = 9.5 Hz), 115.7 (d,  $J$  = 21.5 Hz), 109.9 (d,  $J$  = 22.6 Hz), 96.7 (d,  $J$  = 28.3 Hz), 63.8, 50.2, 24.0. HRMS (ESI)  $m/z$ :  $[\text{M} + \text{H}]^+$  Calcd for  $\text{C}_{16}\text{H}_{14}\text{O}_2\text{NF}_2$  290.0987; Found 290.0993.  $[\alpha]_D^{20}$  = +103.5° ( $c$  1.0,  $\text{CHCl}_3$ ). Enantiomeric excess: 91%, determined by HPLC (Chiralpak-OD-H, hexane/isopropanol = 90/10, flow rate 1.0 mL/min, T = 25 °C, 254 nm):  $t_R$  = 6.292 min (minor),  $t_R$  = 7.296 min (major).

### 1-Methoxy-3,5-dimethyl-3-(*m*-tolyl)indolin-2-one (2g)

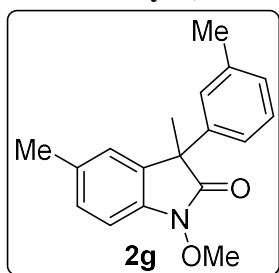

38.1 mg (90% yield).  $^1\text{H}$  NMR (400 MHz,  $\text{CDCl}_3$ )  $\delta$  7.19 (t,  $J$  = 7.6 Hz, 1H), 7.15 – 7.10 (m, 2H), 7.09 – 7.03 (m, 2H), 6.98 (s, 1H), 6.95 (d,  $J$  = 7.9 Hz, 1H), 4.01 (s, 3H), 2.33 (s, 3H), 2.32 (s, 3H), 1.77 (s, 3H).  $^{13}\text{C}$  NMR (100 MHz,  $\text{CDCl}_3$ )  $\delta$  174.2, 140.1, 138.4, 137.1, 133.2, 131.8, 128.6, 128.4, 127.3, 125.2, 123.7, 107.4, 63.5, 50.9, 23.4, 21.7, 21.4. HRMS (ESI)  $m/z$ :  $[\text{M} + \text{H}]^+$  Calcd for  $\text{C}_{18}\text{H}_{20}\text{O}_2\text{N}$  282.1489; Found 282.1490.  $[\alpha]_D^{20}$  = +113.0° ( $c$  1.0,  $\text{CHCl}_3$ ). Enantiomeric excess: 93%, determined by HPLC (Chiralpak-AD-H, hexane/isopropanol = 90/10, flow rate 1.0

mL/min, T = 25 °C, 254 nm):  $t_R$  = 5.179 min (minor),  $t_R$  = 6.919 min (major).

**1-Methoxy-3-methyl 5-trifluoromethyl-3-(3-trifluoromethylphenyl)indolin-2-one**

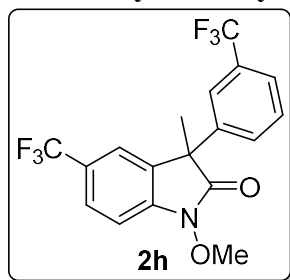

**(2h)**

18.0 mg (31% yield) was obtained at 80 °C for 96 h.  $^1\text{H}$  NMR (400 MHz,  $\text{CDCl}_3$ )  $\delta$  7.68 (d,  $J$  = 8.2 Hz, 1H), 7.60 – 7.55 (m, 2H), 7.47 (t,  $J$  = 7.9 Hz, 1H), 7.42 (d,  $J$  = 7.5 Hz, 2H), 7.19 (d,  $J$  = 8.2 Hz, 1H), 4.06 (s, 3H), 1.86 (s, 3H).  $^{13}\text{C}$  NMR (100 MHz,  $\text{CDCl}_3$ )  $\delta$  173.3, 142.6, 140.0, 131.4 (q,  $J$  = 32.3 Hz), 131.0, 130.1, 129.6, 126.8 (q,  $J$  = 3.9 Hz), 126.3 (q,  $J$  = 32.8 Hz), 125.1 (q,  $J$  = 3.7 Hz), 124.2 (q,  $J$  = 271.7 Hz), 124.0 (q,  $J$  = 272.5 Hz), 123.4 (q,  $J$  = 4.0 Hz), 121.7 (q,  $J$  = 3.7 Hz), 107.9, 64.0, 50.9, 23.6. HRMS (ESI)  $m/z$ :  $[\text{M} + \text{H}]^+$  Calcd for  $\text{C}_{18}\text{H}_{14}\text{O}_2\text{NF}_6$  390.0923; Found 390.0929.  $[\alpha]_D^{20}$  = +55.2° ( $c$  0.5,  $\text{CHCl}_3$ ). Enantiomeric excess: 86%, determined by HPLC (Chiralpak-AD-H, hexane/isopropanol = 95/5, flow rate 1.0 mL/min, T = 25 °C, 254 nm):  $t_R$  = 4.597 min (minor),  $t_R$  = 5.140 min (major).

**3-(3,4-Dimethylphenyl)-1-methoxy-3,5,6-trimethylindolin-2-one (2i)**

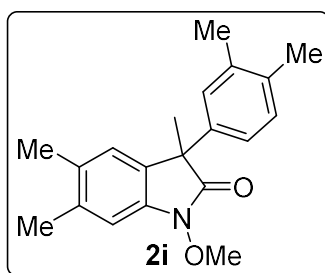

35.4 mg (76% yield).  $^1\text{H}$  NMR (400 MHz,  $\text{CDCl}_3$ )  $\delta$  7.07 (d,  $J$  = 1.3 Hz, 1H), 7.05 (d,  $J$  = 7.9 Hz, 1H), 6.99 (dd,  $J$  = 7.9, 1.9 Hz, 1H), 6.93 (s, 1H), 6.86 (s, 1H), 4.00 (s, 3H), 2.32 (s, 3H), 2.23 (s, 3H), 2.22 (s, 3H), 2.21 (s, 3H), 1.75 (s, 3H).  $^{13}\text{C}$  NMR (100 MHz,  $\text{CDCl}_3$ )  $\delta$  174.6, 137.8, 137.5, 136.9, 136.7, 135.9, 131.5, 129.9, 129.2, 127.8, 125.6, 124.0, 109.0, 63.5, 50.5, 23.5, 20.3, 20.1, 19.8, 19.5. HRMS (ESI)  $m/z$ :  $[\text{M} + \text{H}]^+$  Calcd for  $\text{C}_{20}\text{H}_{24}\text{O}_2\text{N}$  310.1802; Found 310.1813.  $[\alpha]_D^{20}$  = +107.2° ( $c$  1.0,  $\text{CHCl}_3$ ). Enantiomeric excess: 87%, determined by HPLC (Chiralpak-AD-H, hexane/isopropanol = 90/10, flow rate 1.0 mL/min, T = 25 °C, 254 nm):  $t_R$  = 5.436 min (minor),  $t_R$  = 8.260 min (major).

**1,6-Dimethoxy-3-(4-methoxy-3-methylphenyl)-3,5-dimethylindolin-2-one (2j)**

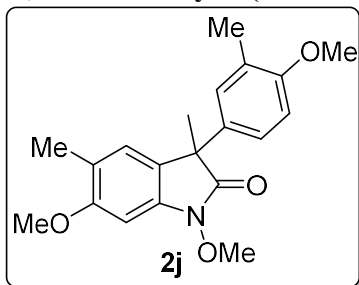

39.0 mg (76% yield) was obtained by using  $\text{Pd}(\text{acac})_2$  (10 mol%) as catalyst at 50 °C for 48 h.  $^1\text{H}$  NMR (400 MHz,  $\text{CDCl}_3$ )  $\delta$  7.11 – 7.02 (m, 2H), 6.93 (s, 1H), 6.74 (d,  $J$  = 8.3 Hz, 1H), 6.62 (s, 1H), 4.02 (s, 3H), 3.90 (s, 3H), 3.78 (s, 3H), 2.18 (s, 3H), 2.17 (s, 3H), 1.72 (s, 3H).  $^{13}\text{C}$  NMR (100 MHz,  $\text{CDCl}_3$ )  $\delta$  175.1, 158.0, 157.1, 138.5, 132.0, 129.0, 126.8, 126.4, 125.0, 122.3, 121.1, 109.9, 91.6, 63.6, 55.9, 55.4, 50.0, 23.8, 16.6, 16.3. HRMS (ESI)  $m/z$ :  $[\text{M} + \text{H}]^+$  Calcd for  $\text{C}_{20}\text{H}_{24}\text{O}_4\text{N}$  342.1700; Found 342.1712.  $[\alpha]_D^{20}$  = +70.4° ( $c$  1.0,  $\text{CHCl}_3$ ).

Enantiomeric excess: 83%, determined by HPLC (Chiralpak-AD-H, hexane/isopropanol = 87/13, flow rate 1.0 mL/min, T = 25 °C, 254 nm):  $t_R$  = 6.877 min (minor),  $t_R$  = 9.890 min (major).

### 5-Chloro-3-(3-chloro-4-methoxyphenyl)-1,6-dimethoxy-3-methylindolin-2-one

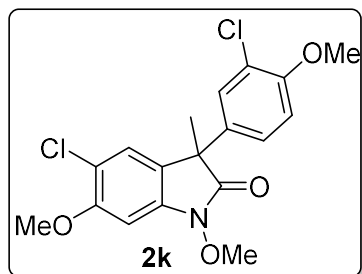

**(2k)**

37.8 mg (66% yield) was obtained by using Pd(acac)<sub>2</sub> (10 mol%) as catalyst, AgOAc (15 mol%) as acetate, and Tfpz-Phe-NHOMe (30 mol%) as ligand. <sup>1</sup>H NMR (400 MHz, CDCl<sub>3</sub>) δ 7.26 (d, *J* = 2.4 Hz, 1H), 7.20 – 7.13 (m, 2H), 6.87 (d, *J* = 8.7 Hz, 1H), 6.71 (s, 1H), 4.03 (s, 3H), 3.99 (s, 3H), 3.87 (s, 3H), 1.73 (s, 3H). <sup>13</sup>C NMR (100 MHz, CDCl<sub>3</sub>) δ 174.0, 155.8, 154.6, 139.4, 132.7, 128.5, 126.2, 126.1, 122.8, 122.6, 116.8, 112.2, 93.4, 63.9, 56.8, 56.3, 49.8, 23.8. HRMS (ESI) *m/z*: [M + H]<sup>+</sup> Calcd for C<sub>18</sub>H<sub>18</sub>O<sub>4</sub>NC<sub>2</sub> 382.0607; Found 382.0623. [α]<sub>D</sub><sup>20</sup> = +90.4° (*c* 1.0, CHCl<sub>3</sub>). Enantiomeric excess: 85%, determined by HPLC (Chiralpak-AD-H, hexane/isopropanol = 87/13, flow rate 1.0 mL/min, T = 25 °C, 254 nm):  $t_R$  = 11.056 min (minor),  $t_R$  = 13.336 min (major).

### 7-Chloro-3-(3-chloro-4-methoxyphenyl)-1,6-dimethoxy-3-methylindolin-2-one

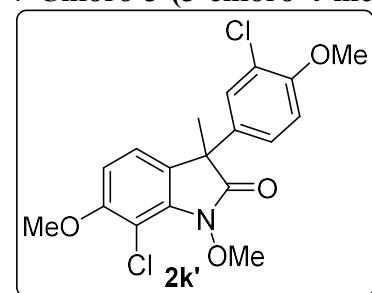

**(2k')**

9.1 mg (16% yield) was obtained with **2k** as separable mixture. <sup>1</sup>H NMR (400 MHz, CDCl<sub>3</sub>) δ 7.17 (d, *J* = 2.2 Hz, 1H), 7.09 (dd, *J* = 8.6, 2.2 Hz, 1H), 6.91 (d, *J* = 8.2 Hz, 1H), 6.79 (d, *J* = 8.7 Hz, 1H), 6.59 (d, *J* = 8.2 Hz, 1H), 3.96 (s, 3H), 3.87 (s, 3H), 3.80 (s, 3H), 1.67 (s, 3H). <sup>13</sup>C NMR (100 MHz, CDCl<sub>3</sub>) δ 175.4, 156.1, 154.5, 137.4, 133.1, 128.6, 126.2, 124.9, 122.9, 122.7, 112.2, 106.2, 105.1, 65.0, 56.7, 56.3, 48.7, 24.1. HRMS (ESI) *m/z*: [M + H]<sup>+</sup> Calcd for C<sub>18</sub>H<sub>18</sub>O<sub>4</sub>NC<sub>2</sub> 382.0607; Found 382.0622. [α]<sub>D</sub><sup>20</sup> = +41.3° (*c* 0.4, CHCl<sub>3</sub>). Enantiomeric excess: 73%, determined by HPLC (Chiralpak-AD-H, hexane/isopropanol = 87/13, flow rate 1.0 mL/min, T = 25 °C, 254 nm):  $t_R$  = 15.319 min (minor),  $t_R$  = 17.644 min (major).

### 3-(2,3-Dihydro-1*H*-inden-5-yl)-1-methoxy-3-methyl-3,5,6,7-tetrahydrocyclopenta[*f*]indol-2(1*H*)-one (2l)

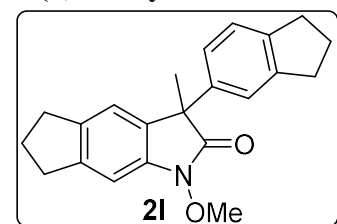

**(2l)**

25.1 mg (50% yield) was obtained by using Pd(acac)<sub>2</sub> (10 mol%) as catalyst. <sup>1</sup>H NMR (400 MHz, CDCl<sub>3</sub>) δ 7.18 (s, 1H), 7.14 (d, *J* = 7.9 Hz, 1H), 7.04 (dd, *J* = 7.9, 1.6 Hz, 1H), 7.01 (s, 1H), 6.94 (s, 1H), 4.01 (s, 3H), 2.95 (t, *J* = 7.4 Hz, 2H), 2.90 – 2.82 (m,

6H), 2.15 – 1.98 (m, 4H), 1.76 (s, 3H).  $^{13}\text{C}$  NMR (100 MHz,  $\text{CDCl}_3$ )  $\delta$  174.7, 144.9, 144.2, 143.6, 139.2, 138.3, 137.9, 130.2, 124.5, 124.5, 122.7, 120.6, 104.2, 63.4, 50.8, 33.3, 33.0, 32.6 (2C), 25.7, 25.6, 23.7. HRMS (ESI)  $m/z$ :  $[\text{M} + \text{H}]^+$  Calcd for  $\text{C}_{22}\text{H}_{24}\text{O}_2\text{N}$  334.1802; Found 334.1816.  $[\alpha]_{\text{D}}^{20} = +100.3^\circ$  ( $c$  1.0,  $\text{CHCl}_3$ ). Enantiomeric excess: 85%, determined by HPLC (Chiralpak-AD-H, hexane/isopropanol = 90/10, flow rate 1.0 mL/min,  $T = 25^\circ\text{C}$ , 254 nm):  $t_{\text{R}} = 5.770$  min (minor),  $t_{\text{R}} = 8.247$  min (major).

**5-(2,3-Dihydrobenzofuran-5-yl)-7-methoxy-5-methyl-2,3,5,7-tetrahydro-6H-**

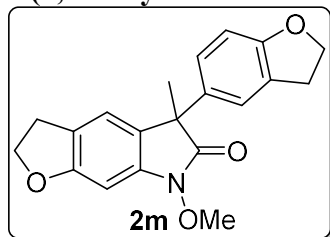

**furo[3,2-f]indol-6-one (2m)**

20.7 mg (41% yield) was obtained by using  $\text{Pd}(\text{acac})_2$  (10 mol%) as catalyst for 30 h.  $^1\text{H}$  NMR (400 MHz,  $\text{CDCl}_3$ )  $\delta$  7.16 (d,  $J = 0.6$  Hz, 1H), 7.00 (dd,  $J = 8.4, 2.1$  Hz, 1H), 6.96 (s, 1H), 6.69 (d,  $J = 8.4$  Hz, 1H), 6.56 (s, 1H), 4.62 (t,  $J = 8.7$  Hz, 2H), 4.54 (t,  $J = 8.7$  Hz, 2H), 3.99 (s, 3H), 3.17 (td,  $J = 8.6, 5.6$  Hz, 4H), 1.73 (s, 3H).  $^{13}\text{C}$  NMR (100 MHz,  $\text{CDCl}_3$ )  $\delta$  175.0, 160.3, 159.6, 139.6, 132.6, 127.6, 126.5, 123.5, 123.4, 121.3, 121.0, 109.2, 91.2, 72.1, 71.6, 63.5, 50.2, 29.9, 29.6, 24.0. HRMS (ESI)  $m/z$ :  $[\text{M} + \text{H}]^+$  Calcd for  $\text{C}_{20}\text{H}_{20}\text{O}_4\text{N}$  338.1387; Found 338.1401.  $[\alpha]_{\text{D}}^{20} = +136.4^\circ$  ( $c$  1.0,  $\text{CHCl}_3$ ). Enantiomeric excess: 90%, determined by HPLC (Chiralpak-AD-H, hexane/isopropanol = 87/13, flow rate 1.0 mL/min,  $T = 25^\circ\text{C}$ , 254 nm):  $t_{\text{R}} = 14.240$  min (minor),  $t_{\text{R}} = 21.634$  min (major).

**3-(2,3-Dihydrobenzofuran-5-yl)-1-methoxy-3-methyl-1,3,7,8-tetrahydro-2H-**

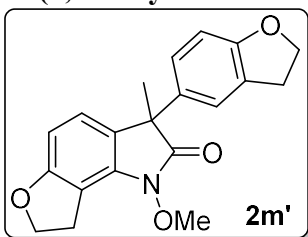

**furo[2,3-g]indol-2-one (2m')**

7.1 mg (14% yield) was obtained with **2m** as separable mixture.  $^1\text{H}$  NMR (400 MHz,  $\text{CDCl}_3$ )  $\delta$  7.17 (s, 1H), 7.01 (d,  $J = 8.3$  Hz, 1H), 6.90 (d,  $J = 7.9$  Hz, 1H), 6.68 (d,  $J = 8.4$  Hz, 1H), 6.53 (d,  $J = 8.0$  Hz, 1H), 4.68 (t,  $J = 8.6$  Hz, 2H), 4.54 (t,  $J = 8.7$  Hz, 2H), 3.99 (s, 3H), 3.48 – 3.32 (m, 2H), 3.16 (t,  $J = 8.6$  Hz, 2H), 1.73 (s, 3H).  $^{13}\text{C}$  NMR (100 MHz,  $\text{CDCl}_3$ )  $\delta$  175.6, 161.8, 159.6, 136.4, 132.6, 127.6, 126.5, 124.0, 123.5, 123.4, 109.2, 107.9, 103.7, 72.1, 71.6, 64.5, 50.2, 29.9, 27.5, 24.4. HRMS (ESI)  $m/z$ :  $[\text{M} + \text{H}]^+$  Calcd for  $\text{C}_{20}\text{H}_{20}\text{O}_4\text{N}$  338.1387; Found 338.1401.  $[\alpha]_{\text{D}}^{20} = +43.1^\circ$  ( $c$  0.5,  $\text{CHCl}_3$ ). Enantiomeric excess: 90%, determined by HPLC (Chiralpak-AD-H, hexane/isopropanol = 87/13, flow rate 1.0 mL/min,  $T = 25^\circ\text{C}$ , 254 nm):  $t_{\text{R}} = 12.979$  min (minor),  $t_{\text{R}} = 15.573$  min (major).

### 3-Ethyl-1-methoxy-3-phenylindolin-2-one (2n)

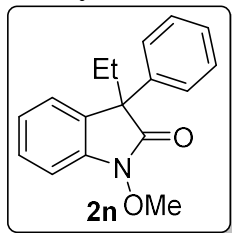

39.1 mg (97% yield).  $^1\text{H}$  NMR (400 MHz,  $\text{CDCl}_3$ )  $\delta$  7.39 – 7.33 (m, 3H), 7.33 – 7.28 (m, 2H), 7.28 – 7.20 (m, 2H), 7.14 (td,  $J$  = 7.6, 1.0 Hz, 1H), 7.06 (d,  $J$  = 7.7 Hz, 1H), 4.01 (s, 3H), 2.47 (dq,  $J$  = 14.8, 7.4 Hz, 1H), 2.24 (dq,  $J$  = 14.7, 7.4 Hz, 1H), 0.73 (t,  $J$  = 7.4 Hz, 3H).  $^{13}\text{C}$  NMR (100 MHz,  $\text{CDCl}_3$ )  $\delta$  173.2, 140.5, 139.6, 128.8, 128.4, 127.6, 127.0, 125.1, 123.4, 107.6, 63.6, 56.1, 30.9, 9.1. HRMS (ESI)  $m/z$ :  $[\text{M} + \text{H}]^+$  Calcd for  $\text{C}_{17}\text{H}_{18}\text{O}_2\text{N}$  268.1332; Found 268.1328.  $[\alpha]_{\text{D}}^{20}$  = +114.4° ( $c$  1.0,  $\text{CHCl}_3$ ). Enantiomeric excess: 90%, determined by HPLC (Chiralpak-OD-H, hexane/isopropanol = 95/5, flow rate 1.0 mL/min,  $T$  = 25 °C, 254 nm):  $t_{\text{R}}$  = 8.645 min (major),  $t_{\text{R}}$  = 9.438 min (minor).

### 3-Isoamyl-1-methoxy-3-phenylindolin-2-one (2o)

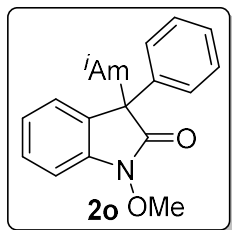

24.0 mg (52% yield).  $^1\text{H}$  NMR (400 MHz,  $\text{CDCl}_3$ )  $\delta$  7.41 – 7.25 (m, 6H), 7.24 (d,  $J$  = 8.4 Hz, 1H), 7.14 (t,  $J$  = 7.6 Hz, 1H), 7.06 (d,  $J$  = 7.8 Hz, 1H), 4.01 (s, 3H), 2.38 (td,  $J$  = 12.6, 4.4 Hz, 1H), 2.20 (td,  $J$  = 12.9, 3.9 Hz, 1H), 1.54 – 1.42 (m, 1H), 1.15 – 1.01 (m, 1H), 0.82 (d,  $J$  = 6.7 Hz, 3H), 0.80 (d,  $J$  = 6.7 Hz, 3H), 0.78 – 0.70 (m, 1H).  $^{13}\text{C}$  NMR (100 MHz,  $\text{CDCl}_3$ )  $\delta$  173.3, 140.3, 139.7, 129.0, 128.7, 128.4, 127.6, 126.9, 125.1, 123.3, 107.6, 63.6, 55.4, 35.9, 33.3, 28.3, 22.7, 22.4. HRMS (ESI)  $m/z$ :  $[\text{M} + \text{H}]^+$  Calcd for  $\text{C}_{20}\text{H}_{24}\text{O}_2\text{N}$  310.1802; Found 310.1806.  $[\alpha]_{\text{D}}^{20}$  = +97.7° ( $c$  1.0,  $\text{CHCl}_3$ ). Enantiomeric excess: 87%, determined by HPLC (Chiralpak-AD-H, hexane/isopropanol = 90/10, flow rate 1.0 mL/min,  $T$  = 25 °C, 254 nm):  $t_{\text{R}}$  = 8.184 min (major),  $t_{\text{R}}$  = 9.188 min (minor).

### 3-Isobutyl-1-methoxy-3-phenylindolin-2-one (2p)

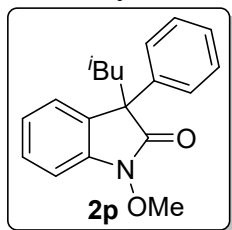

14.1 mg (32% yield) was obtained at 65 °C.  $^1\text{H}$  NMR (400 MHz,  $\text{CDCl}_3$ )  $\delta$  7.40 – 7.33 (m, 3H), 7.31 – 7.20 (m, 4H), 7.15 (t,  $J$  = 7.5 Hz, 1H), 7.06 (d,  $J$  = 7.8 Hz, 1H), 4.00 (s, 3H), 2.45 (dd,  $J$  = 13.9, 7.7 Hz, 1H), 2.16 (dd,  $J$  = 13.9, 5.1 Hz, 1H), 1.44 (tt,  $J$  = 13.1, 6.7 Hz, 1H), 0.79 (d,  $J$  = 6.6 Hz, 3H), 0.69 (d,  $J$  = 6.7 Hz, 3H).  $^{13}\text{C}$  NMR (100 MHz,  $\text{CDCl}_3$ )  $\delta$  173.8, 140.9, 140.4, 128.7, 128.5, 127.5, 126.7, 125.8, 123.1, 107.7, 63.5, 55.0, 46.5, 25.8, 24.4, 23.1. HRMS (ESI)  $m/z$ :  $[\text{M} + \text{H}]^+$  Calcd for  $\text{C}_{19}\text{H}_{22}\text{O}_2\text{N}$  296.1645; Found 296.1647.  $[\alpha]_{\text{D}}^{20}$  = +87.2° ( $c$  0.5,  $\text{CHCl}_3$ ). Enantiomeric excess: 82%, determined by HPLC (Chiralpak-OD-H, hexane/isopropanol = 95/5, flow rate 0.5 mL/min,  $T$  = 25 °C, 254 nm):  $t_{\text{R}}$  = 11.523 min (major),  $t_{\text{R}}$  = 12.709 min (minor).



### 3-(Ethoxymethyl)-1-methoxy-3-phenylindolin-2-one (2q)

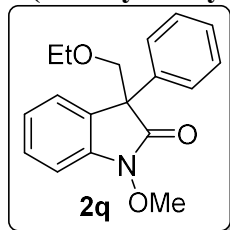

22.9 mg (51% yield) was obtained for 36 h.  $^1\text{H}$  NMR (400 MHz,  $\text{CDCl}_3$ )  $\delta$  7.42 – 7.26 (m, 7H), 7.14 (td,  $J$  = 7.6, 1.1 Hz, 1H), 7.05 (dd,  $J$  = 8.0, 0.9 Hz, 1H), 4.12 (s, 2H), 3.99 (s, 3H), 3.53 – 3.32 (m, 2H), 1.02 (t,  $J$  = 7.0 Hz, 3H).  $^{13}\text{C}$  NMR (100 MHz,  $\text{CDCl}_3$ )  $\delta$  171.9, 140.6, 136.6, 128.8, 128.6, 127.9, 127.9, 127.2, 125.5, 123.2, 107.5, 74.5, 67.3, 63.3, 56.4, 14.9. HRMS (ESI)  $m/z$ :  $[\text{M} + \text{H}]^+$  Calcd for  $\text{C}_{18}\text{H}_{20}\text{O}_3\text{N}$  298.1438; Found 298.1442.  $[\alpha]_{\text{D}}^{20}$  = +114.6° ( $c$  1.0,  $\text{CHCl}_3$ ). Enantiomeric excess: 92%, determined by HPLC (Chiralpak-AD-H, hexane/isopropanol = 90/10, flow rate 1.0 mL/min,  $T$  = 25 °C, 254 nm):  $t_{\text{R}}$  = 10.605 min (major),  $t_{\text{R}}$  = 13.498 min (minor).

### 1-Ethoxy-3-methyl-3-phenylindolin-2-one (2r)

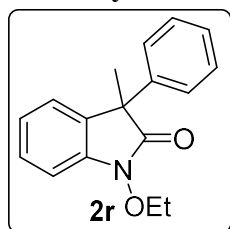

37.9 mg (95% yield).  $^1\text{H}$  NMR (400 MHz,  $\text{CDCl}_3$ )  $\delta$  7.33 (td,  $J$  = 7.7, 1.3 Hz, 1H), 7.32 – 7.22 (m, 5H), 7.18 (ddd,  $J$  = 7.4, 1.2, 0.5 Hz, 1H), 7.10 (td,  $J$  = 7.5, 1.1 Hz, 1H), 7.05 (ddd,  $J$  = 7.8, 1.0, 0.6 Hz, 1H), 4.27 (q,  $J$  = 7.1 Hz, 2H), 1.80 (s, 3H), 1.39 (t,  $J$  = 7.1 Hz, 3H).  $^{13}\text{C}$  NMR (100 MHz,  $\text{CDCl}_3$ )  $\delta$  174.5, 140.5, 140.2, 131.4, 128.8, 128.4, 127.6, 126.7, 124.4, 123.4, 107.9, 72.0, 51.0, 23.6, 13.9. HRMS (ESI)  $m/z$ :  $[\text{M} + \text{H}]^+$  Calcd for  $\text{C}_{17}\text{H}_{18}\text{O}_2\text{N}$  268.1332; Found 268.1333.  $[\alpha]_{\text{D}}^{20}$  = +94.8° ( $c$  1.0,  $\text{CHCl}_3$ ). Enantiomeric excess: 94%, determined by HPLC (Chiralpak-AD-H, hexane/isopropanol = 90/10, flow rate 1.0 mL/min,  $T$  = 25 °C, 254 nm):  $t_{\text{R}}$  = 6.614 min (minor),  $t_{\text{R}}$  = 8.667 min (major).

### 1-(Benzyloxy)-3-methyl-3-phenylindolin-2-one (2s)

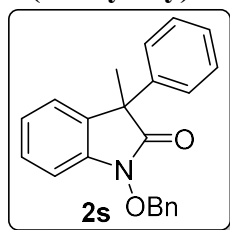

43.3 mg (88% yield) was obtained by using TFE as solvent.  $^1\text{H}$  NMR (400 MHz,  $\text{CDCl}_3$ )  $\delta$  7.47 – 7.39 (m, 2H), 7.37 – 7.19 (m, 9H), 7.12 (d,  $J$  = 6.8 Hz, 1H), 7.04 (td,  $J$  = 7.5, 1.0 Hz, 1H), 6.88 (d,  $J$  = 7.8 Hz, 1H), 5.18 (s, 2H), 1.78 (s, 3H).  $^{13}\text{C}$  NMR (100 MHz,  $\text{CDCl}_3$ )  $\delta$  174.6, 140.5, 140.1, 134.3, 131.1, 130.2, 129.4, 128.7 (2C), 128.2, 127.6, 126.7, 124.2, 123.3, 108.0, 78.0, 51.0, 23.5. HRMS (ESI)  $m/z$ :  $[\text{M} + \text{H}]^+$  Calcd for  $\text{C}_{22}\text{H}_{20}\text{O}_2\text{N}$  330.1489; Found 330.1489.  $[\alpha]_{\text{D}}^{20}$  = +111.6° ( $c$  1.0,  $\text{CHCl}_3$ ). Enantiomeric excess: 91%, determined by HPLC (Chiralpak-ID, hexane/isopropanol = 90/10, flow rate 1.0 mL/min,  $T$  = 25 °C, 254 nm):  $t_{\text{R}}$  = 12.869 min (minor),  $t_{\text{R}}$  = 18.349 min (major).

## Derivatizations of Product 2a

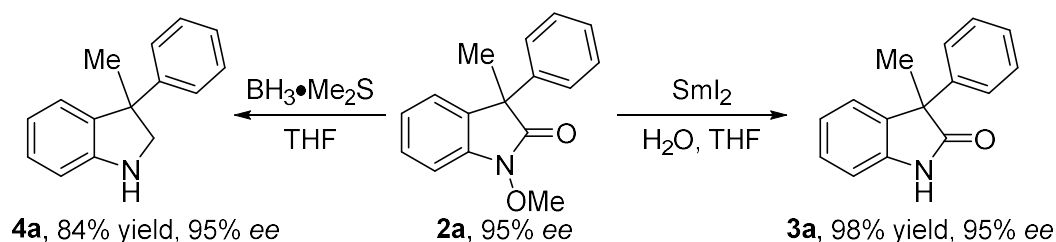

## Deprotection of methoxy group<sup>6</sup>

To a solution of 1-Methoxy-3-methyl-3-phenylindolin-2-one (50.6 mg, 0.2 mmol) in THF (2 mL) and deoxygenated water (0.1 mL) was added SmI<sub>2</sub> (0.1 M in THF, 20 mL, 2.0 mmol, 10 equiv.) in an ice-bath. The mixture was stirred for 1 h, and diluted with EtOAc, washed with saturated NaHCO<sub>3</sub>, saturated Na<sub>2</sub>S<sub>2</sub>O<sub>3</sub> and brine, dried over anhydrous Na<sub>2</sub>SO<sub>4</sub>, filtered and concentrated under reduced pressure. The residue was purified by column chromatography (petroleum ether/acetone = 4:1) to give **3a** (43.5 mg, 98% yield) as a white solid.

## 3-Methyl-3-phenylindolin-2-one (3a)

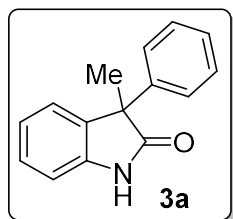

<sup>1</sup>H NMR (400 MHz, CDCl<sub>3</sub>) δ 9.21 (s, 1H), 7.36 – 7.18 (m, 6H), 7.12 (d, *J* = 7.2 Hz, 1H), 7.04 (t, *J* = 7.4 Hz, 1H), 6.97 (d, *J* = 7.7 Hz, 1H), 1.83 (s, 3H). <sup>13</sup>C NMR (100 MHz, CDCl<sub>3</sub>) δ 182.5, 140.6, 140.6, 135.7, 128.7, 128.2, 127.5, 126.8, 124.5, 122.9, 110.4, 52.9, 23.5. HRMS (ESI) *m/z*: [M + H]<sup>+</sup> Calcd for C<sub>15</sub>H<sub>14</sub>ON 224.1070; Found 224.1079. [α]<sub>D</sub><sup>20</sup> = +100.5° (*c* 1.0, CHCl<sub>3</sub>). Enantiomeric excess: 95%, determined by HPLC (Chiralpak-OD-H, hexane/isopropanol = 87/13, flow rate 1.0 mL/min, T = 25 °C, 254 nm): *t*<sub>R</sub> = 7.518 min (minor), *t*<sub>R</sub> = 15.083 min (major).

## Reduction of lactam<sup>9</sup>

To a solution of 1-Methoxy-3-methyl-3-phenylindolin-2-one (101.2 mg, 0.4 mmol) in dried THF (5 mL) was added BH<sub>3</sub>·Me<sub>2</sub>S (2.0 M in THF, 0.66 mL, 1.32 mmol, 3.3 equiv.) dropwise in an ice-bath. The mixture was warmed to room temperature and stirred for 2.5 h, then heated to reflux for 48 h. After cooling to 0 °C, 10% HCl was added slowly to quench the reaction, and the resulting solution was refluxed for 1.5 h. The mixture was cooled to 0 °C again, and 12 N NaOH was added until pH > 10. The mixture was extracted with Et<sub>2</sub>O for three times, and the combined organic phase was

washed with brine, dried over anhydrous Na<sub>2</sub>SO<sub>4</sub>, filtered and concentrated under reduced pressure. The residue was purified by flash column chromatography (petroleum ether/EtOAc = 5:1) to give **4a** (35.0 mg, 84% yield) as a colorless liquid.

### 3-Methyl-3-phenylindoline (**4a**)

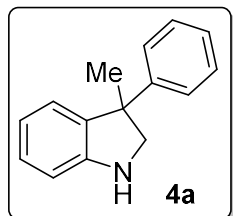

<sup>1</sup>H NMR (400 MHz, CDCl<sub>3</sub>) δ 7.35 – 7.25 (m, 4H), 7.22 – 7.16 (m, 1H), 7.09 (td, *J* = 7.7, 1.2 Hz, 1H), 6.97 (d, *J* = 7.4 Hz, 1H), 6.76 (td, *J* = 7.4, 0.8 Hz, 1H), 6.72 (d, *J* = 7.8 Hz, 1H), 3.72 (d, *J* = 8.9 Hz, 1H), 3.57 (d, *J* = 8.9 Hz, 1H), 1.72 (s, 3H). <sup>13</sup>C NMR (100 MHz, CDCl<sub>3</sub>) δ 150.8, 147.8, 137.1, 128.3, 127.8, 126.7, 126.3, 124.3, 119.2, 110.1, 63.8, 49.8, 26.3. HRMS (ESI) *m/z*: [M + H]<sup>+</sup> Calcd for C<sub>15</sub>H<sub>16</sub>N 210.1277; Found 210.1285. [α]<sub>D</sub><sup>20</sup> = +67.3° (*c* 1.0, CHCl<sub>3</sub>). Enantiomeric excess: 95%, determined by HPLC (Chiralpak-OD-H, hexane/isopropanol = 95/5, flow rate 1.0 mL/min, T = 25 °C, 254 nm): *t*<sub>R</sub> = 8.726 min (minor), *t*<sub>R</sub> = 11.417 min (major).

### Determination of the Absolute Configuration of Product **2n**

The crystal of **2n** was obtained via solvent diffusion of DCM solution and hexane. The crystal of **2n**, which was detected by X-ray, was the major product determined by chiral HPLC.

### X-ray crystal data of the enantiomerically enriched isomer **2n**:

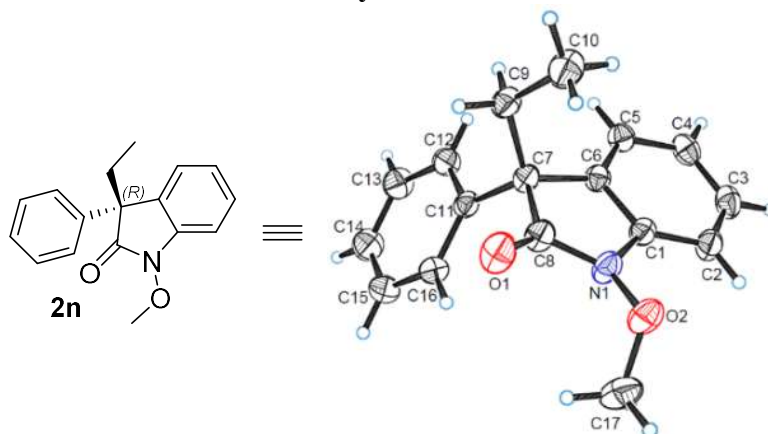

**Table S5 Crystal data and structure refinement for cxf-160315.**

|                     |                                                 |
|---------------------|-------------------------------------------------|
| Identification code | cxf-160315                                      |
| Empirical formula   | C <sub>17</sub> H <sub>17</sub> NO <sub>2</sub> |
| Formula weight      | 267.31                                          |
| Temperature/K       | 290(2)                                          |
| Crystal system      | orthorhombic                                    |

|                                             |                                                               |
|---------------------------------------------|---------------------------------------------------------------|
| Space group                                 | P2 <sub>1</sub> 2 <sub>1</sub> 2 <sub>1</sub>                 |
| a/Å                                         | 7.0909(2)                                                     |
| b/Å                                         | 9.2808(2)                                                     |
| c/Å                                         | 22.0489(4)                                                    |
| α/°                                         | 90                                                            |
| β/°                                         | 90                                                            |
| γ/°                                         | 90                                                            |
| Volume/Å <sup>3</sup>                       | 1451.02(6)                                                    |
| Z                                           | 4                                                             |
| ρ <sub>calc</sub> /g/cm <sup>3</sup>        | 1.224                                                         |
| μ/mm <sup>-1</sup>                          | 0.640                                                         |
| F(000)                                      | 568.0                                                         |
| Crystal size/mm <sup>3</sup>                | 0.360 × 0.320 × 0.270                                         |
| Radiation                                   | CuKα (λ = 1.54184)                                            |
| 2Θ range for data collection/°              | 8.02 to 140.348                                               |
| Index ranges                                | -8 ≤ h ≤ 8, -11 ≤ k ≤ 7, -26 ≤ l ≤ 26                         |
| Reflections collected                       | 10055                                                         |
| Independent reflections                     | 2697 [R <sub>int</sub> = 0.0251, R <sub>sigma</sub> = 0.0155] |
| Data/restraints/parameters                  | 2697/0/184                                                    |
| Goodness-of-fit on F <sup>2</sup>           | 1.048                                                         |
| Final R indexes [I ≥ 2σ (I)]                | R <sub>1</sub> = 0.0320, wR <sub>2</sub> = 0.0904             |
| Final R indexes [all data]                  | R <sub>1</sub> = 0.0326, wR <sub>2</sub> = 0.0909             |
| Largest diff. peak/hole / e Å <sup>-3</sup> | 0.14/-0.13                                                    |
| Flack parameter                             | -0.04(5)                                                      |

**Table S6 Fractional Atomic Coordinates (×10<sup>4</sup>) and Equivalent Isotropic Displacement Parameters (Å<sup>2</sup>×10<sup>3</sup>) for cxf-160315. U<sub>eq</sub> is defined as 1/3 of the trace of the orthogonalised U<sub>ij</sub> tensor.**

| Atom | x        | y           | z          | U(eq)   |
|------|----------|-------------|------------|---------|
| O1   | 9657(3)  | 12014.1(15) | 3820.8(7)  | 74.7(5) |
| O2   | 8081(2)  | 10810.1(16) | 4874.2(6)  | 71.9(4) |
| C7   | 9544(2)  | 9569.6(17)  | 3372.5(7)  | 47.2(4) |
| N1   | 8325(2)  | 10116.9(17) | 4325.1(6)  | 59.0(4) |
| C9   | 11648(2) | 9571(2)     | 3189.1(8)  | 56.4(4) |
| C1   | 8212(2)  | 8614.3(18)  | 4275.9(7)  | 49.1(4) |
| C6   | 8953(2)  | 8217.7(17)  | 3715.7(7)  | 45.7(4) |
| C12  | 8415(3)  | 8918(2)     | 2320.7(8)  | 56.8(4) |
| C5   | 9078(3)  | 6779.1(18)  | 3574.0(9)  | 54.7(4) |
| C2   | 7524(3)  | 7634(2)     | 4689.6(8)  | 61.8(5) |
| C16  | 6955(3)  | 10938(2)    | 2797.8(9)  | 61.7(5) |
| C11  | 8270(2)  | 9833.3(17)  | 2818.9(7)  | 47.0(4) |
| C4   | 8431(3)  | 5762(2)     | 3988.3(10) | 64.1(5) |
| C8   | 9225(3)  | 10752.4(19) | 3850.3(8)  | 54.4(4) |
| C13  | 7278(3)  | 9117(3)     | 1819.8(9)  | 70.7(5) |
| C10  | 12994(3) | 9332(3)     | 3711.7(10) | 81.8(7) |
| C14  | 5985(3)  | 10204(3)    | 1804.4(10) | 78.6(6) |
| C15  | 5820(3)  | 11119(3)    | 2293.7(11) | 77.8(6) |
| C3   | 7640(3)  | 6194(2)     | 4529.8(10) | 66.4(5) |
| C17  | 6369(4)  | 11621(3)    | 4868.9(13) | 90.9(8) |

**Table S7 Anisotropic Displacement Parameters ( $\text{\AA}^2 \times 10^3$ ) for cxf-160315. The Anisotropic displacement factor exponent takes the form: -**

$$2\pi^2[h^2a^{*2}U_{11}+2hka^*b^*U_{12}+...].$$

| Atom | U <sub>11</sub> | U <sub>22</sub> | U <sub>33</sub> | U <sub>23</sub> | U <sub>13</sub> | U <sub>12</sub> |
|------|-----------------|-----------------|-----------------|-----------------|-----------------|-----------------|
| O1   | 103.9(11)       | 49.6(7)         | 70.6(9)         | -10.5(6)        | 12.3(8)         | -21.1(7)        |
| O2   | 88.7(10)        | 79.0(9)         | 48.1(7)         | -19.3(6)        | 8.1(7)          | -0.8(8)         |
| C7   | 53.5(9)         | 44.3(8)         | 43.9(8)         | -2.4(6)         | 6.0(7)          | -5.5(7)         |
| N1   | 78.5(10)        | 54.1(8)         | 44.3(7)         | -8.2(6)         | 13.2(7)         | -3.7(7)         |

|     |          |           |          |           |           |           |
|-----|----------|-----------|----------|-----------|-----------|-----------|
| C9  | 51.9(9)  | 65.3(10)  | 52.0(9)  | 2.9(8)    | 4.9(7)    | -7.3(8)   |
| C1  | 48.2(8)  | 51.6(9)   | 47.3(8)  | 1.4(7)    | 2.0(7)    | -1.9(7)   |
| C6  | 45.5(8)  | 46.6(8)   | 45.1(8)  | 1.3(6)    | -0.3(6)   | -2.9(6)   |
| C12 | 59.5(10) | 57.9(10)  | 53.1(9)  | -3.2(8)   | -2.1(8)   | 2.5(8)    |
| C5  | 59.5(10) | 48.8(9)   | 55.8(9)  | -0.4(7)   | -2.1(8)   | -0.8(8)   |
| C2  | 62(1)    | 71.6(12)  | 51.9(9)  | 11.6(8)   | 6.0(8)    | -2.5(9)   |
| C16 | 60.1(10) | 62.5(10)  | 62.5(10) | 2.2(8)    | 12.1(9)   | 8.9(9)    |
| C11 | 47.6(8)  | 46.0(8)   | 47.5(8)  | 3.4(6)    | 8.1(6)    | -4.4(6)   |
| C4  | 70.3(11) | 45.0(9)   | 76.9(12) | 8.5(8)    | -11.4(9)  | -3.1(8)   |
| C8  | 64.1(10) | 48.7(9)   | 50.5(9)  | -5.1(7)   | 4.1(8)    | -8.0(8)   |
| C13 | 68.9(12) | 85.7(14)  | 57.4(10) | -6.2(10)  | -9.7(9)   | -2.0(11)  |
| C10 | 57.3(11) | 121(2)    | 67.6(12) | 7.6(12)   | -6.6(10)  | -16.9(13) |
| C14 | 61.0(11) | 106.7(18) | 68.1(12) | 9.6(12)   | -11.6(10) | 2.9(12)   |
| C15 | 58.0(11) | 90.5(15)  | 85.1(14) | 17.3(13)  | 5.4(10)   | 19.6(11)  |
| C3  | 67.9(11) | 61.5(11)  | 69.7(11) | 23.5(9)   | -3.4(10)  | -9.2(9)   |
| C17 | 93.1(17) | 93.2(17)  | 86.5(16) | -25.5(14) | 26.4(14)  | 10.3(14)  |

**Table S8 Bond Lengths for cxf-160315.**

| Atom | Atom | Length/Å   | Atom | Atom | Length/Å |
|------|------|------------|------|------|----------|
| O1   | C8   | 1.212(2)   | C1   | C6   | 1.392(2) |
| O2   | N1   | 1.3819(18) | C6   | C5   | 1.374(2) |
| O2   | C17  | 1.429(3)   | C12  | C13  | 1.380(3) |
| C7   | C6   | 1.524(2)   | C12  | C11  | 1.393(2) |
| C7   | C11  | 1.538(2)   | C5   | C4   | 1.392(3) |
| C7   | C8   | 1.538(2)   | C2   | C3   | 1.385(3) |
| C7   | C9   | 1.546(2)   | C16  | C15  | 1.383(3) |
| N1   | C8   | 1.361(2)   | C16  | C11  | 1.386(2) |
| N1   | C1   | 1.401(2)   | C4   | C3   | 1.379(3) |
| C9   | C10  | 1.512(3)   | C13  | C14  | 1.364(3) |
| C1   | C2   | 1.377(2)   | C14  | C15  | 1.378(3) |

**Table S9 Bond Angles for cxf-160315.**

| Atom | Atom | Atom | Angle/°    | Atom | Atom | Atom | Angle/°    |
|------|------|------|------------|------|------|------|------------|
| N1   | O2   | C17  | 110.14(17) | C1   | C6   | C7   | 109.07(13) |
| C6   | C7   | C11  | 111.32(13) | C13  | C12  | C11  | 120.44(18) |
| C6   | C7   | C8   | 101.95(12) | C6   | C5   | C4   | 119.25(18) |
| C11  | C7   | C8   | 110.10(14) | C1   | C2   | C3   | 116.62(17) |
| C6   | C7   | C9   | 113.33(15) | C15  | C16  | C11  | 120.57(19) |
| C11  | C7   | C9   | 111.05(13) | C16  | C11  | C12  | 118.31(17) |
| C8   | C7   | C9   | 108.69(14) | C16  | C11  | C7   | 122.63(15) |
| C8   | N1   | O2   | 122.07(15) | C12  | C11  | C7   | 119.05(15) |
| C8   | N1   | C1   | 113.49(14) | C3   | C4   | C5   | 120.35(18) |
| O2   | N1   | C1   | 121.61(14) | O1   | C8   | N1   | 125.36(16) |
| C10  | C9   | C7   | 114.19(15) | O1   | C8   | C7   | 127.99(16) |
| C2   | C1   | C6   | 123.14(16) | N1   | C8   | C7   | 106.65(14) |
| C2   | C1   | N1   | 128.76(16) | C14  | C13  | C12  | 120.8(2)   |
| C6   | C1   | N1   | 108.09(14) | C13  | C14  | C15  | 119.6(2)   |
| C5   | C6   | C1   | 118.90(16) | C14  | C15  | C16  | 120.3(2)   |
| C5   | C6   | C7   | 132.01(15) | C4   | C3   | C2   | 121.67(17) |

**Table S10 Torsion Angles for cxf-160315.**

| A   | B  | C  | D   | Angle/°    | A   | B   | C   | D   | Angle/°     |
|-----|----|----|-----|------------|-----|-----|-----|-----|-------------|
| C17 | O2 | N1 | C8  | 88.6(2)    | C13 | C12 | C11 | C16 | 0.2(3)      |
| C17 | O2 | N1 | C1  | -111.7(2)  | C13 | C12 | C11 | C7  | 179.31(17)  |
| C6  | C7 | C9 | C10 | -54.4(2)   | C6  | C7  | C11 | C16 | 108.16(17)  |
| C11 | C7 | C9 | C10 | 179.44(18) | C8  | C7  | C11 | C16 | -4.1(2)     |
| C8  | C7 | C9 | C10 | 58.2(2)    | C9  | C7  | C11 | C16 | -124.56(18) |
| C8  | N1 | C1 | C2  | 174.97(19) | C6  | C7  | C11 | C12 | -70.86(19)  |
| O2  | N1 | C1 | C2  | 13.7(3)    | C8  | C7  | C11 | C12 | 176.83(15)  |

|                 |             |                 |             |
|-----------------|-------------|-----------------|-------------|
| C8 N1 C1 C6     | -4.6(2)     | C9 C7 C11 C12   | 56.4(2)     |
| O2 N1 C1 C6     | -165.90(16) | C6 C5 C4 C3     | 1.2(3)      |
| C2 C1 C6 C5     | -2.7(3)     | O2 N1 C8 O1     | -11.0(3)    |
| N1 C1 C6 C5     | 176.92(17)  | C1 N1 C8 O1     | -172.2(2)   |
| C2 C1 C6 C7     | 178.99(17)  | O2 N1 C8 C7     | 169.60(16)  |
| N1 C1 C6 C7     | -1.41(19)   | C1 N1 C8 C7     | 8.4(2)      |
| C11 C7 C6 C5    | 70.5(2)     | C6 C7 C8 O1     | 172.3(2)    |
| C8 C7 C6 C5     | -172.1(2)   | C11 C7 C8 O1    | -69.5(3)    |
| C9 C7 C6 C5     | -55.5(3)    | C9 C7 C8 O1     | 52.4(3)     |
| C11 C7 C6 C1    | -111.45(15) | C6 C7 C8 N1     | -8.38(19)   |
| C8 C7 C6 C1     | 5.91(18)    | C11 C7 C8 N1    | 109.86(16)  |
| C9 C7 C6 C1     | 122.52(16)  | C9 C7 C8 N1     | -128.31(16) |
| C1 C6 C5 C4     | 1.2(3)      | C11 C12 C13 C14 | -0.4(3)     |
| C7 C6 C5 C4     | 179.10(17)  | C12 C13 C14 C15 | 0.3(4)      |
| C6 C1 C2 C3     | 1.5(3)      | C13 C14 C15 C16 | 0.0(4)      |
| N1 C1 C2 C3     | -177.96(19) | C11 C16 C15 C14 | -0.1(3)     |
| C15 C16 C11 C12 | 0.0(3)      | C5 C4 C3 C2     | -2.4(3)     |
| C15 C16 C11 C7  | -178.99(18) | C1 C2 C3 C4     | 1.0(3)      |

**Table S11 Hydrogen Atom Coordinates ( $\text{\AA}\times 10^4$ ) and Isotropic Displacement Parameters ( $\text{\AA}^2\times 10^3$ ) for cxf-160315.**

| Atom | <i>x</i> | <i>y</i> | <i>z</i> | U(eq) |
|------|----------|----------|----------|-------|
| H9A  | 11851    | 8822     | 2889     | 68    |
| H9B  | 11942    | 10487    | 3000     | 68    |
| H12  | 9284     | 8167     | 2326     | 68    |
| H5   | 9591     | 6489     | 3205     | 66    |
| H2   | 7008     | 7925     | 5057     | 74    |
| H16  | 6836     | 11562    | 3126     | 74    |
| H4   | 8533     | 4785     | 3899     | 77    |
| H13  | 7394     | 8502     | 1489     | 85    |



|      |       |       |      |     |
|------|-------|-------|------|-----|
| H10A | 12827 | 10081 | 4007 | 123 |
| H10B | 14267 | 9350  | 3564 | 123 |
| H10C | 12741 | 8414  | 3895 | 123 |
| H14  | 5220  | 10328 | 1466 | 94  |
| H15  | 4941  | 11863 | 2285 | 93  |
| H3   | 7172  | 5500  | 4795 | 80  |
| H17A | 6197  | 12079 | 5256 | 136 |
| H17B | 5326  | 10988 | 4790 | 136 |
| H17C | 6432  | 12342 | 4557 | 136 |

### Crystal structure determination of [cxf-160315]

**Crystal Data** for  $C_{17}H_{17}NO_2$  ( $M=267.31$  g/mol): orthorhombic, space group  $P2_12_12_1$  (no. 19),  $a = 7.0909(2)$  Å,  $b = 9.2808(2)$  Å,  $c = 22.0489(4)$  Å,  $V = 1451.02(6)$  Å<sup>3</sup>,  $Z = 4$ ,  $T = 290(2)$  K,  $\mu(\text{CuK}\alpha) = 0.640$  mm<sup>-1</sup>,  $D_{\text{calc}} = 1.224$  g/cm<sup>3</sup>, 10055 reflections measured ( $8.02^\circ \leq 2\Theta \leq 140.348^\circ$ ), 2697 unique ( $R_{\text{int}} = 0.0251$ ,  $R_{\text{sigma}} = 0.0155$ ) which were used in all calculations. The final  $R_1$  was 0.0320 ( $I > 2\sigma(I)$ ) and  $wR_2$  was 0.0909 (all data).

## References:

- (1) Shi, B.-F.; Zhang, Y.-H.; Lam, J. K.; Wang, D.-H.; Yu, J.-Q. *J. Am. Chem. Soc.* **2010**, *132*, 460.
- (2) Liu, C.; Li, M. *Chin. J. Chem.* **2013**, *31*, 1274.
- (3) Xiao, K.-J.; Lin, D. W.; Miura, M.; Zhu, R.-Y.; Gong, W.; Wssa, M.; Yu, J.-Q. *J. Am. Chem. Soc.* **2014**, *136*, 8138.
- (4) Lai, M. Y. H.; Brimble, M. A.; Callis, D. J.; Harris, P. W. R.; Levi, M. S.; Sieg, F. *Bioorg. Med. Chem.* **2005**, *13*, 533.
- (5) Vincenti, M.; Ghiglione, N.; Valsania, M. C.; Davit, P.; D. Richardson, S. *Helv. Chim. Acta.* **2004**, *87*, 370.
- (6) Wasa, M.; Yu, J.-Q. *J. Am. Chem. Soc.* **2008**, *130*, 14058.
- (7) Cheng, X.-F.; Li, Y.; Su, Y.-M.; Yin, F.; Wang, J.-Y.; Sheng, J.; Vora, H. U.; Wang, X.-S.; Yu, J.-Q. *J. Am. Chem. Soc.* **2013**, *135*, 1236.
- (8) Jiang, Y.; Chen, C.-A.; Lu, K.; Daniewska, I.; De Leon, J.; Kong, R.; Forray, C.; Li, B.; Hegde, L. G.; Wolinsky, T. D.; Craig, D. A.; Wetzel, J. M.; Andersen, K.; Marzabadi, M. R. *J. Med. Chem.* **2007**, *50*, 3870.
- (9) Zou, M.-F.; Keck, T. M.; Kumar, V.; Donthamsetti, P.; Michino, M.; Burzynski, C.; Schweppe, C.; Bonifazi, A.; Free, R. B.; Sibley, D. R.; Janowsky, A.; Shi, L.; Javitch, J. A.; Newman, A. H. *J. Med. Chem.* **2016**, *59*, 2973.

# <sup>1</sup>H and <sup>13</sup>C Spectra

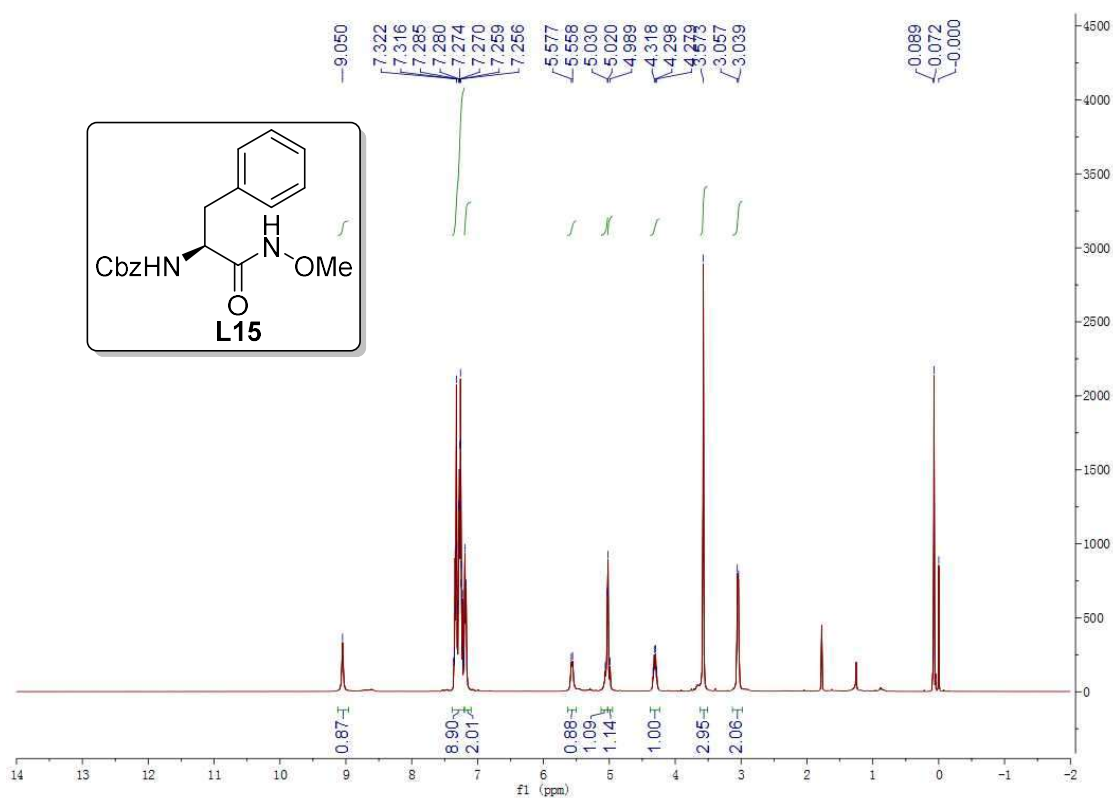

<sup>1</sup>H NMR Spectrum of L15 (CDCl<sub>3</sub>, 400 MHz)

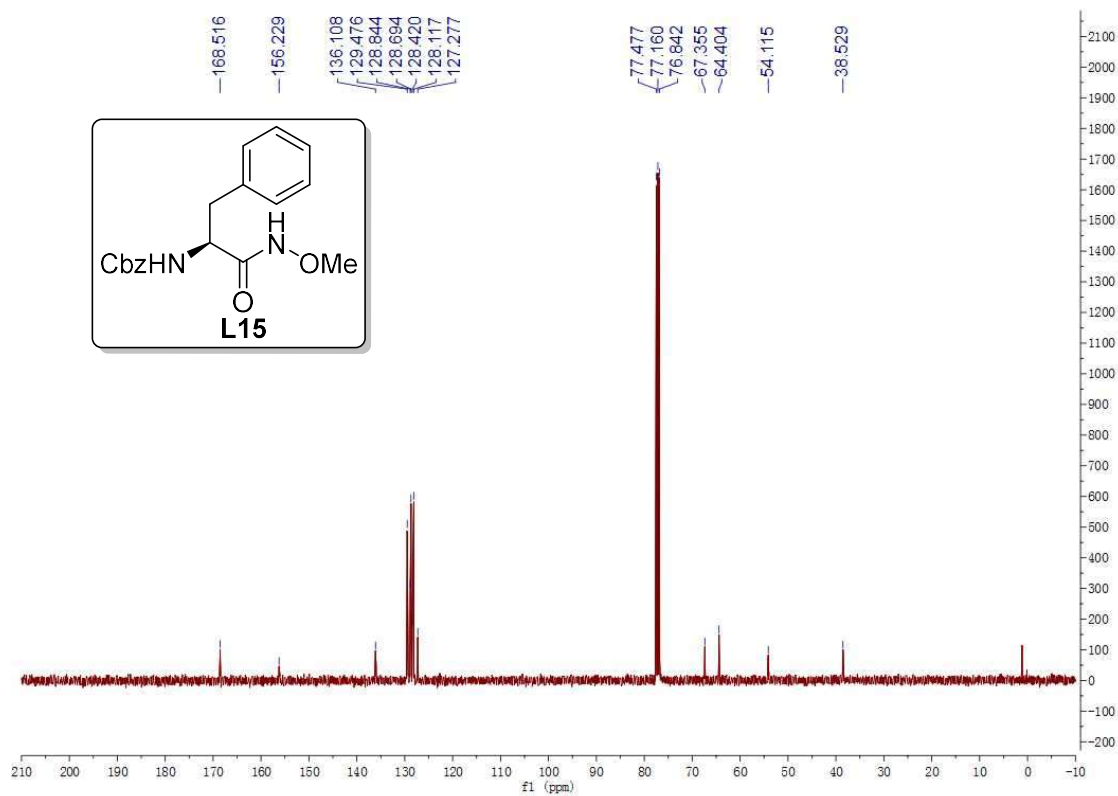

<sup>13</sup>C NMR Spectrum of L15 (CDCl<sub>3</sub>, 100 MHz)

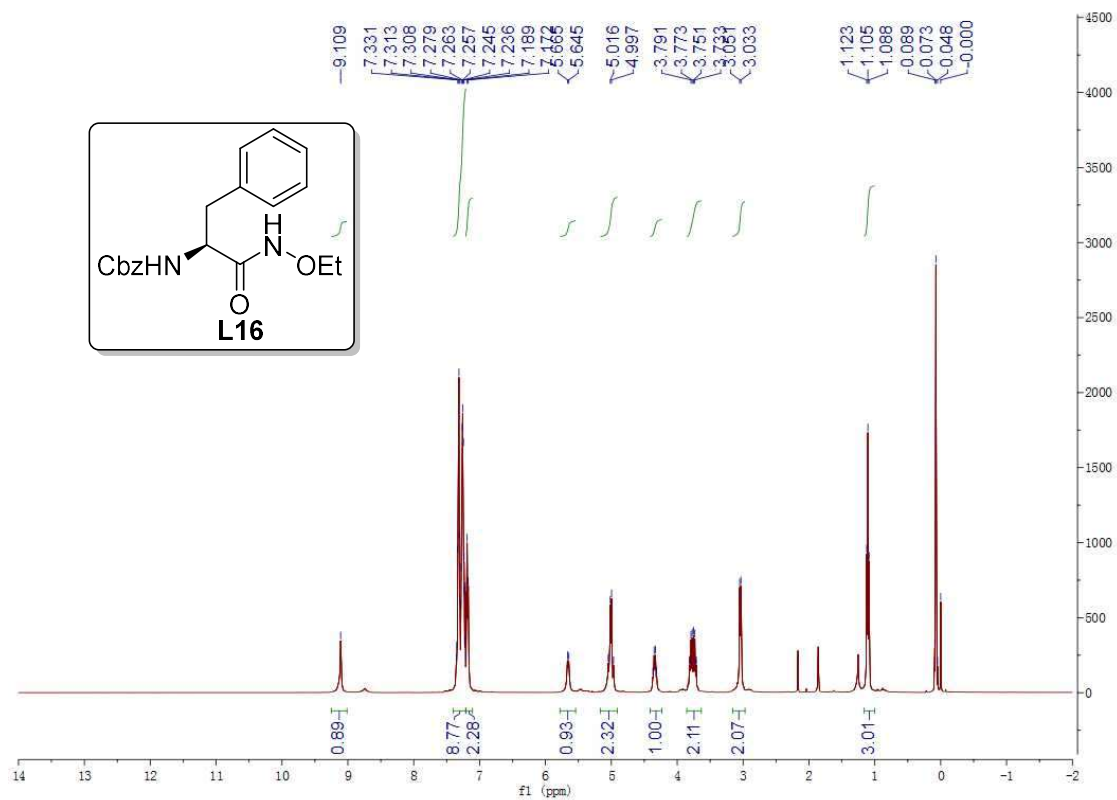

<sup>1</sup>H NMR Spectrum of L16 (CDCl<sub>3</sub>, 400 MHz)

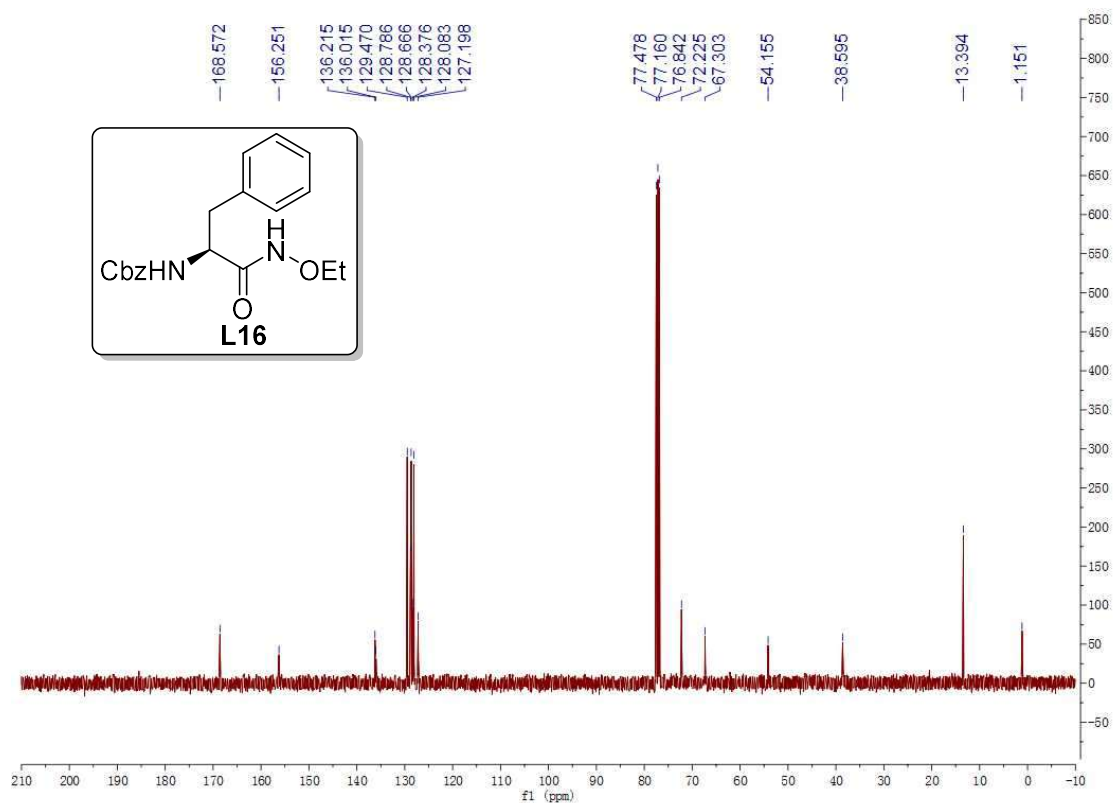

<sup>13</sup>C NMR Spectrum of L16 (CDCl<sub>3</sub>, 100 MHz)

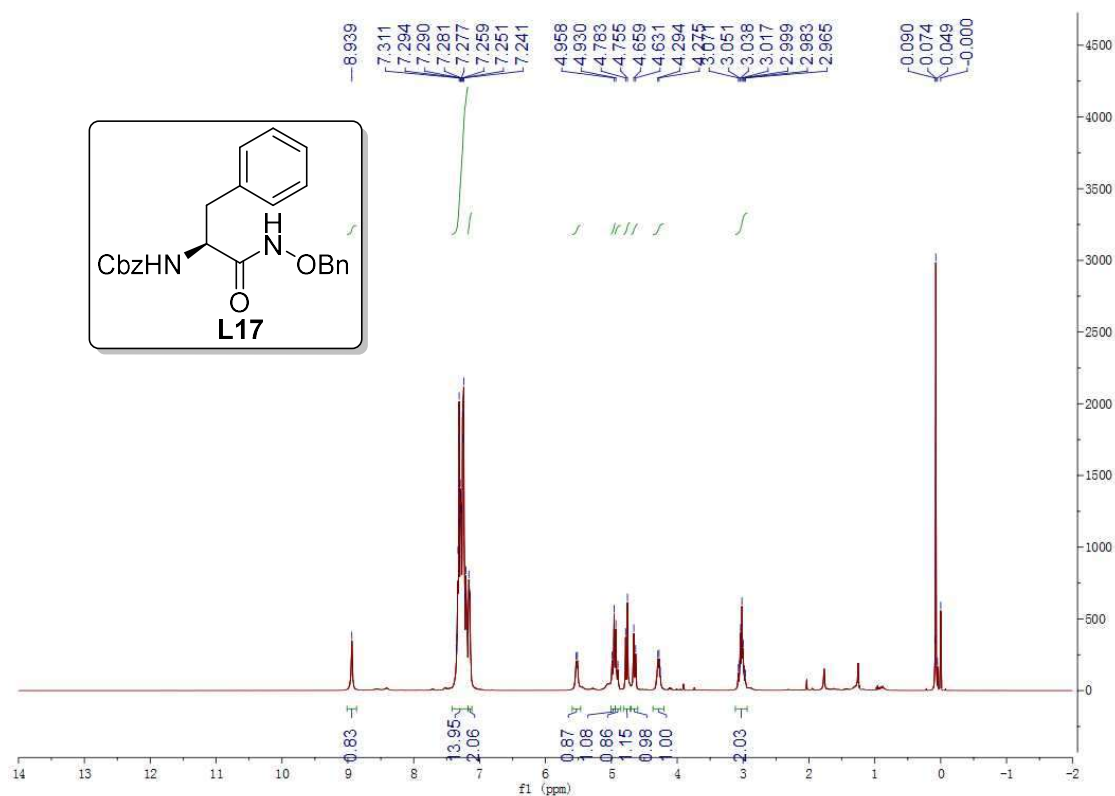

<sup>1</sup>H NMR Spectrum of L17 (CDCl<sub>3</sub>, 400 MHz)

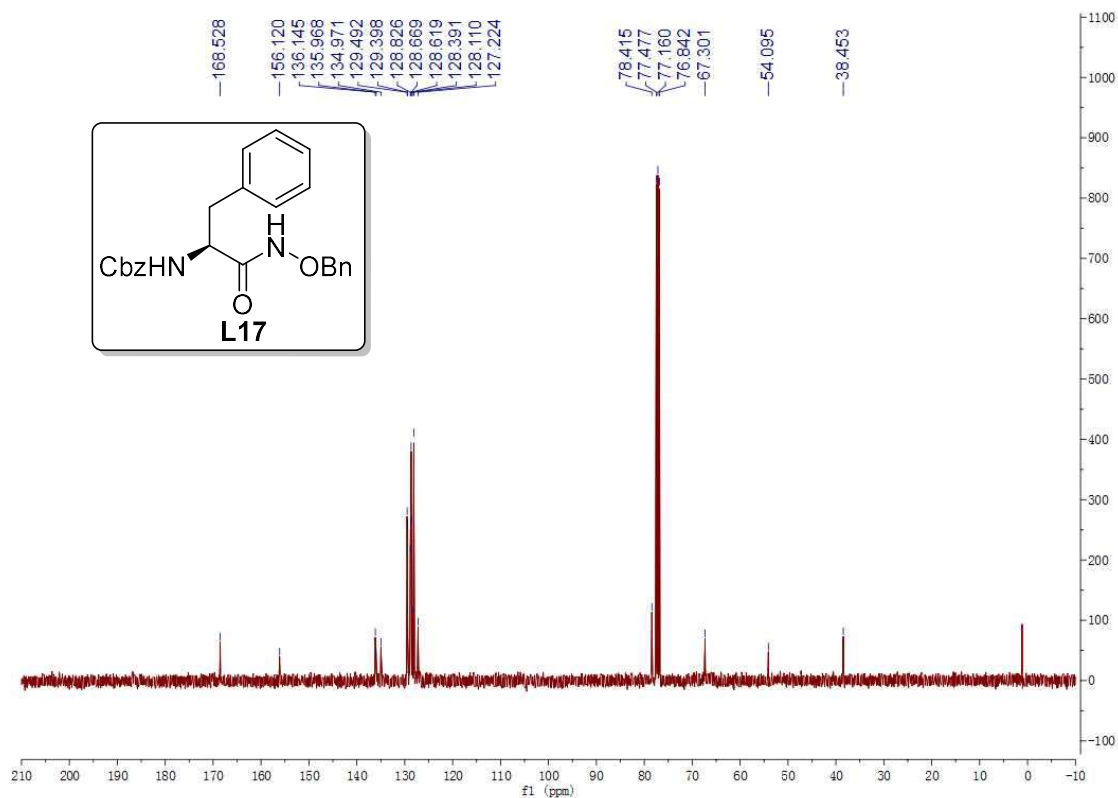

<sup>13</sup>C NMR Spectrum of L17 (CDCl<sub>3</sub>, 100 MHz)

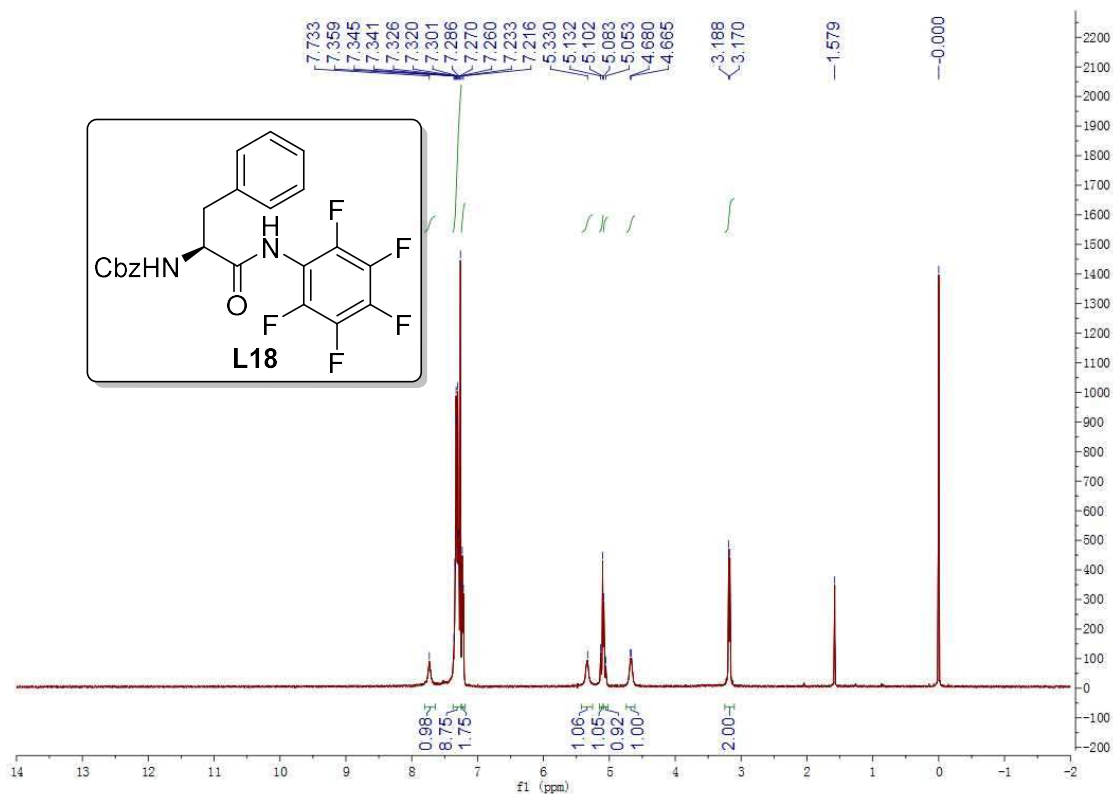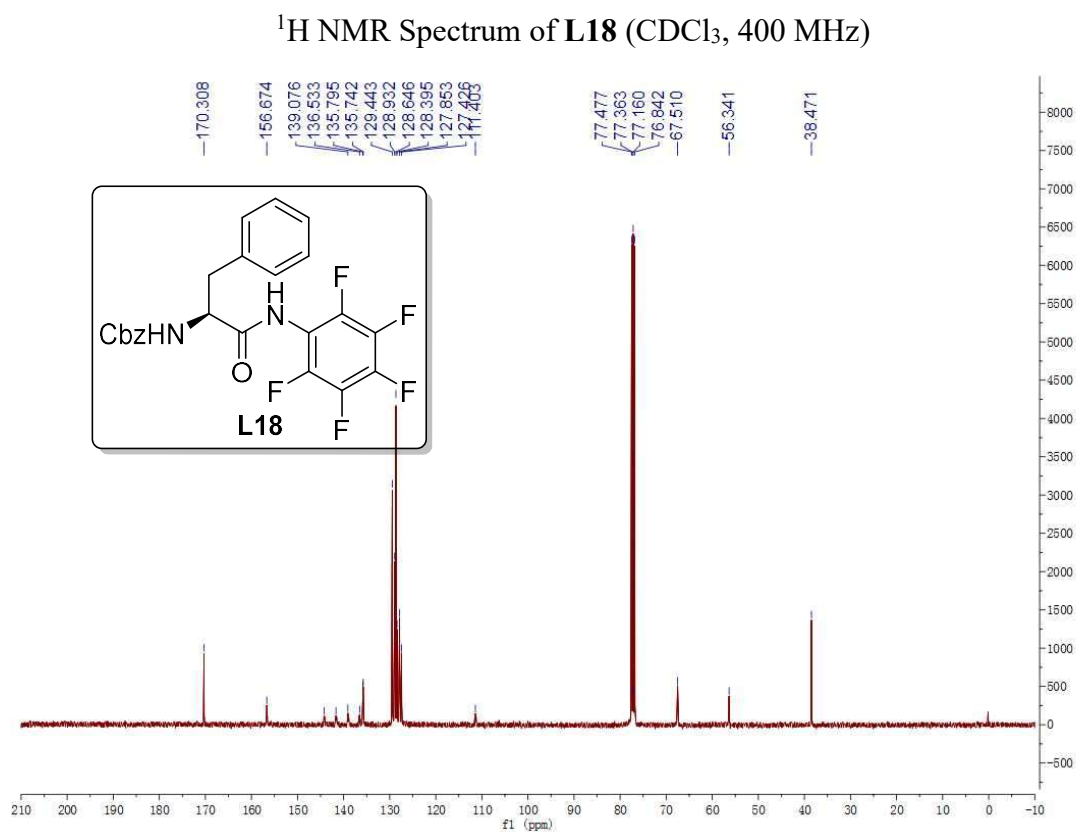

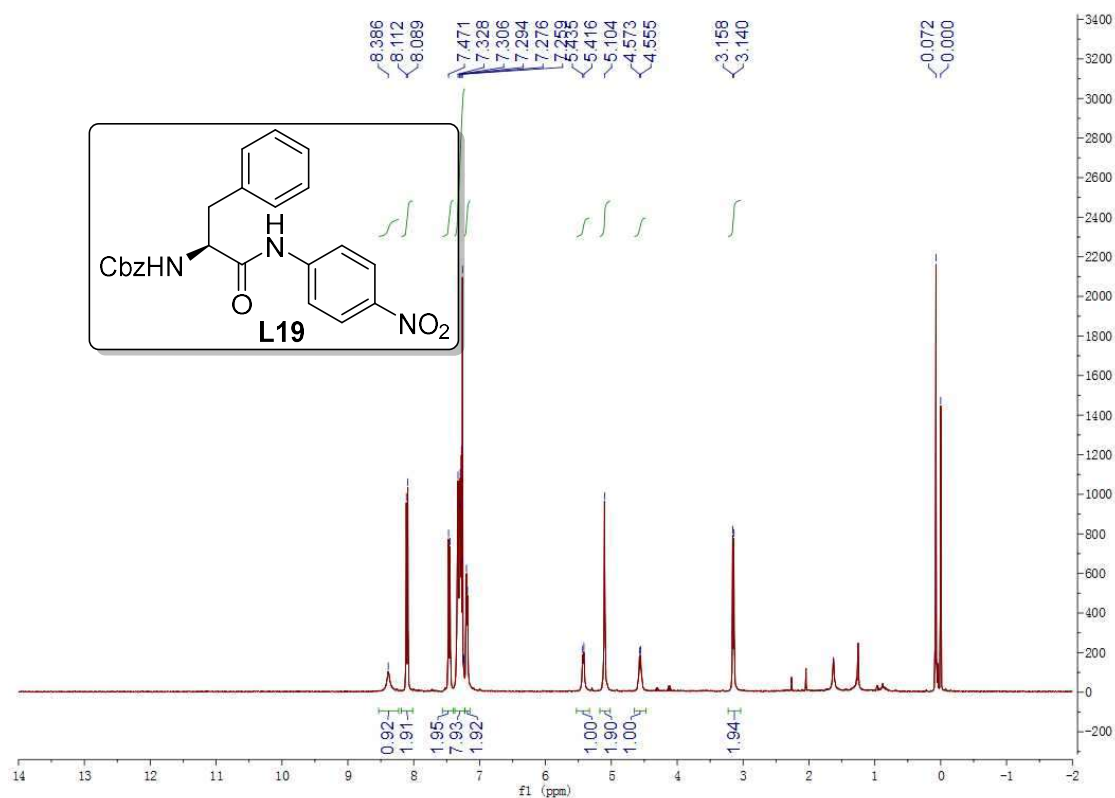

<sup>1</sup>H NMR Spectrum of L19 (CDCl<sub>3</sub>, 400 MHz)

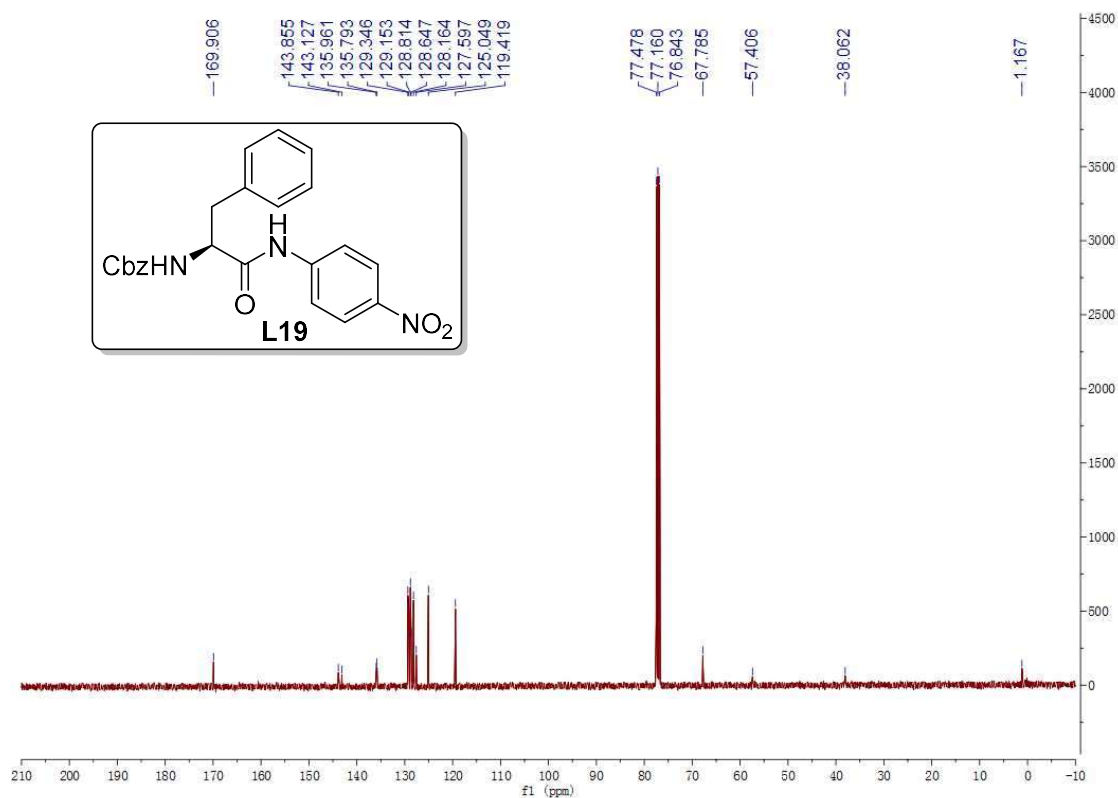

<sup>13</sup>C NMR Spectrum of L19 (CDCl<sub>3</sub>, 100 MHz)

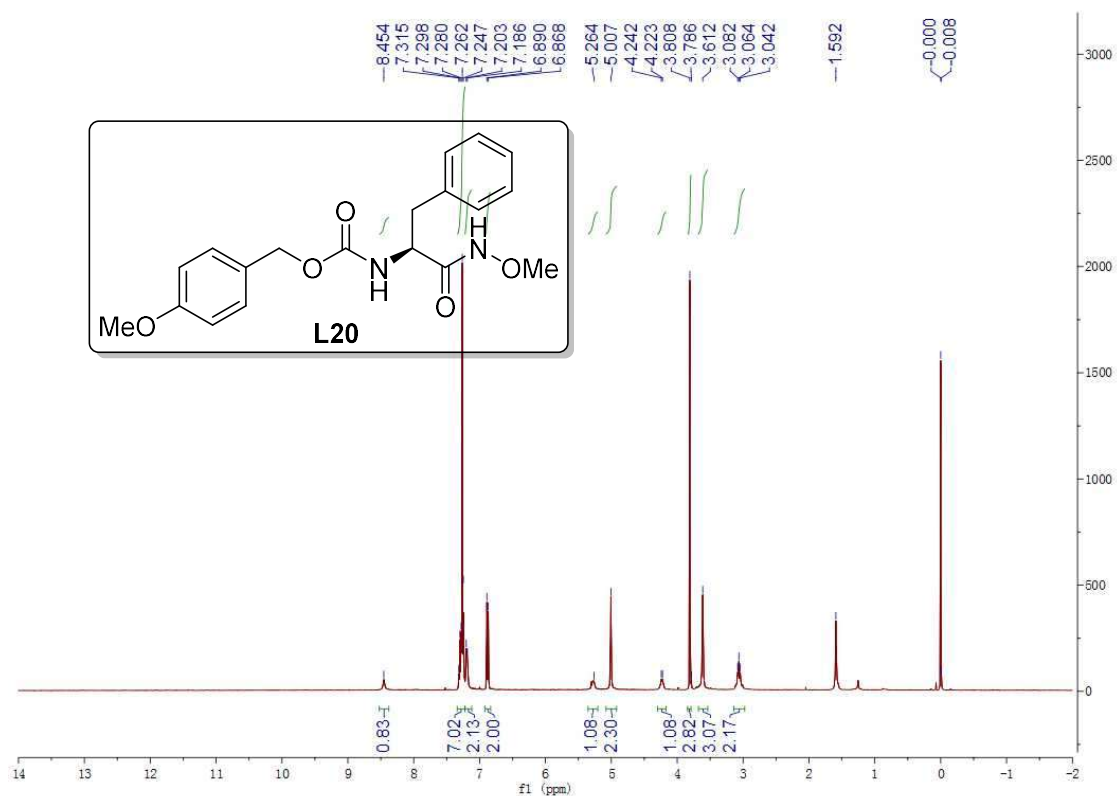

<sup>1</sup>H NMR Spectrum of L20 (CDCl<sub>3</sub>, 400 MHz)

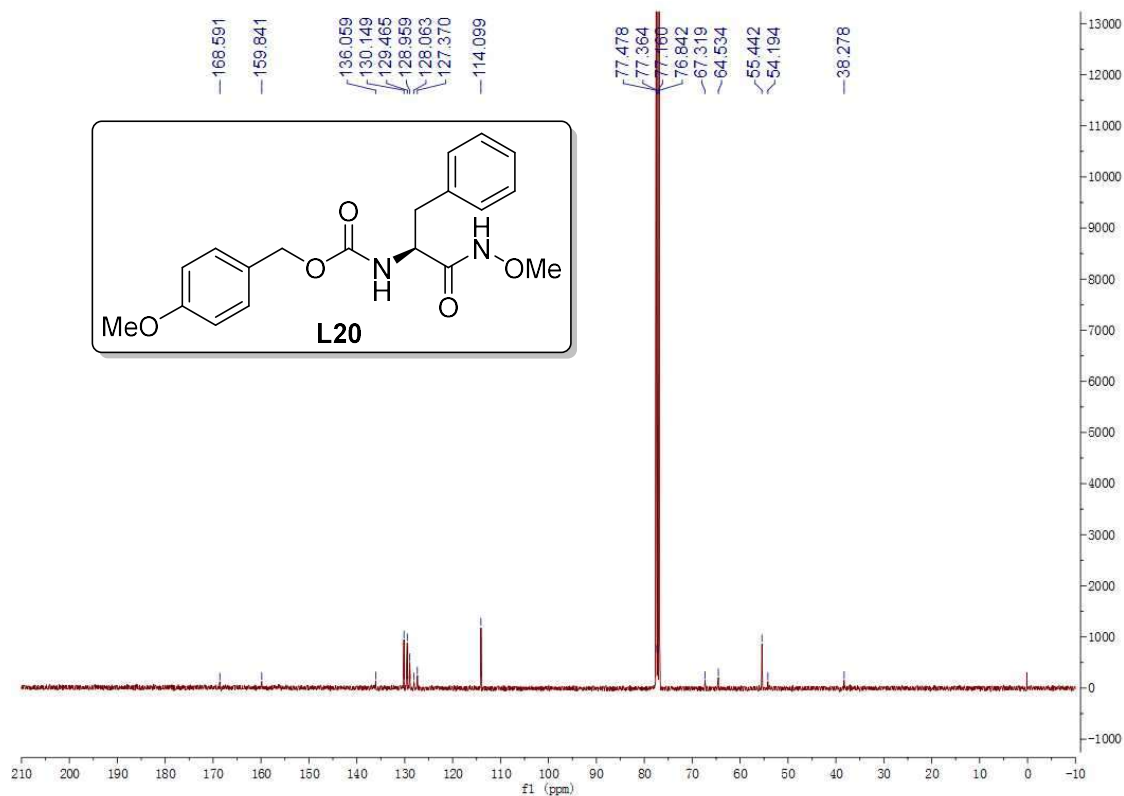

<sup>13</sup>C NMR Spectrum of L20 (CDCl<sub>3</sub>, 100 MHz)



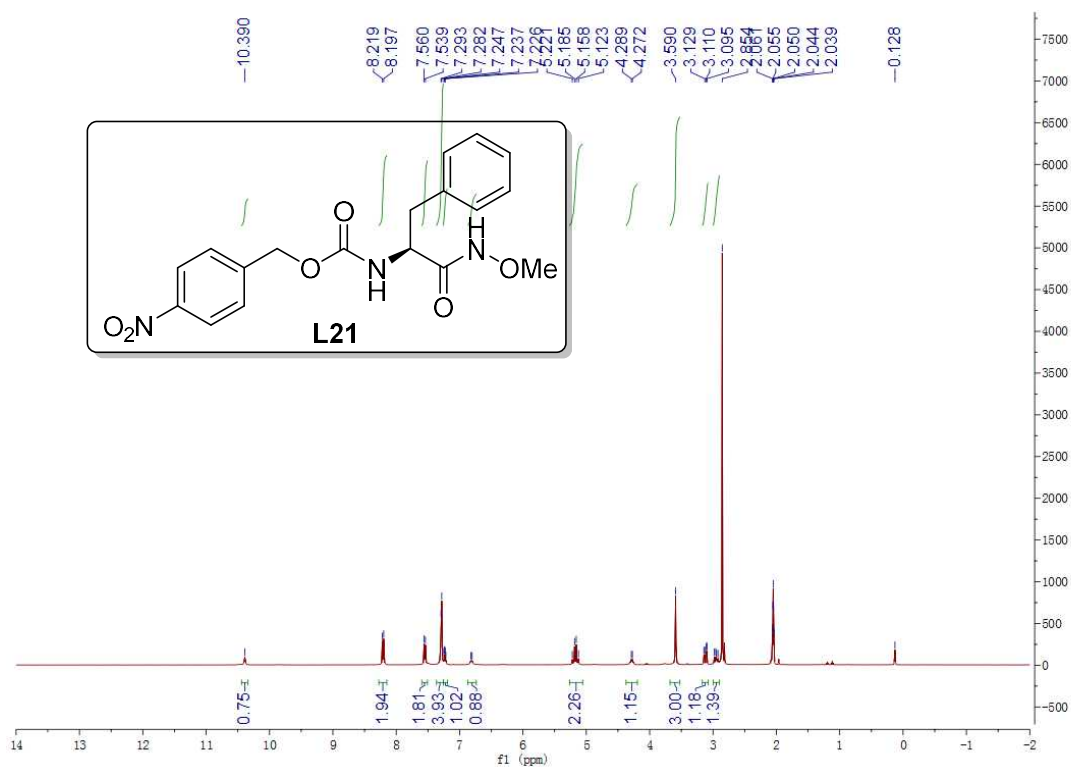

<sup>1</sup>H NMR Spectrum of **L21** (Acetone-d<sub>6</sub>, 400 MHz)

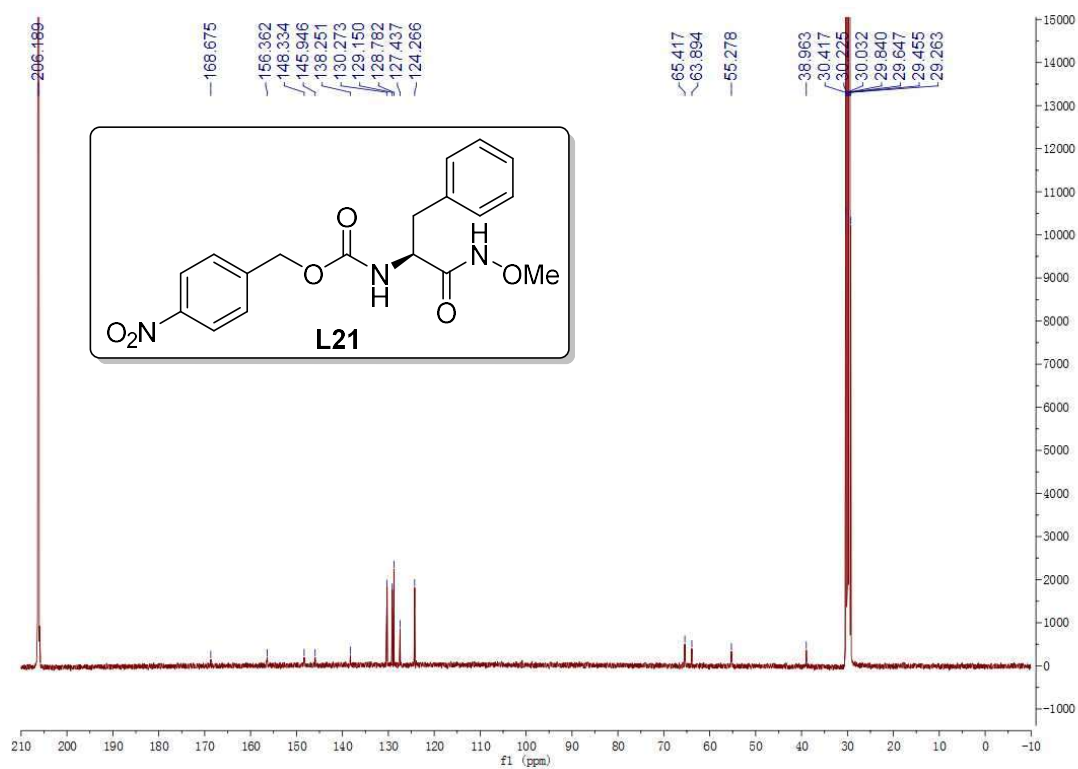

<sup>13</sup>C NMR Spectrum of **L21** (Acetone-d<sub>6</sub>, 100 MHz)

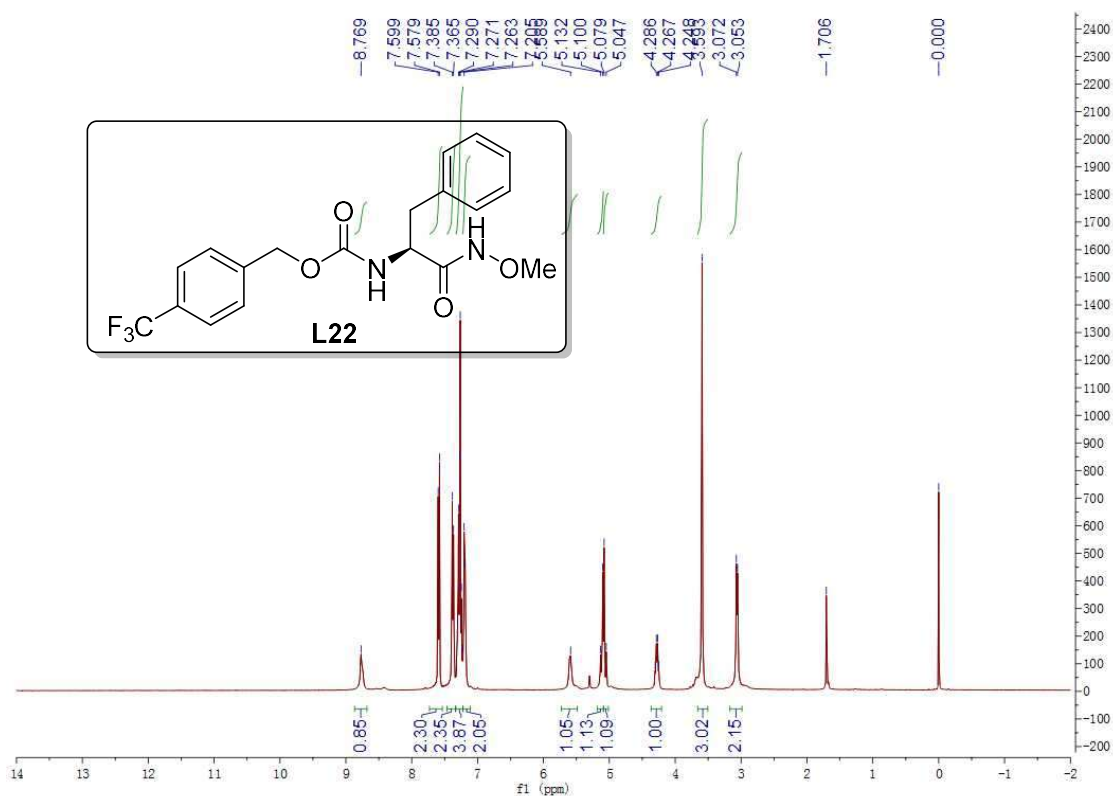

<sup>1</sup>H NMR Spectrum of L22 (CDCl<sub>3</sub>, 400 MHz)

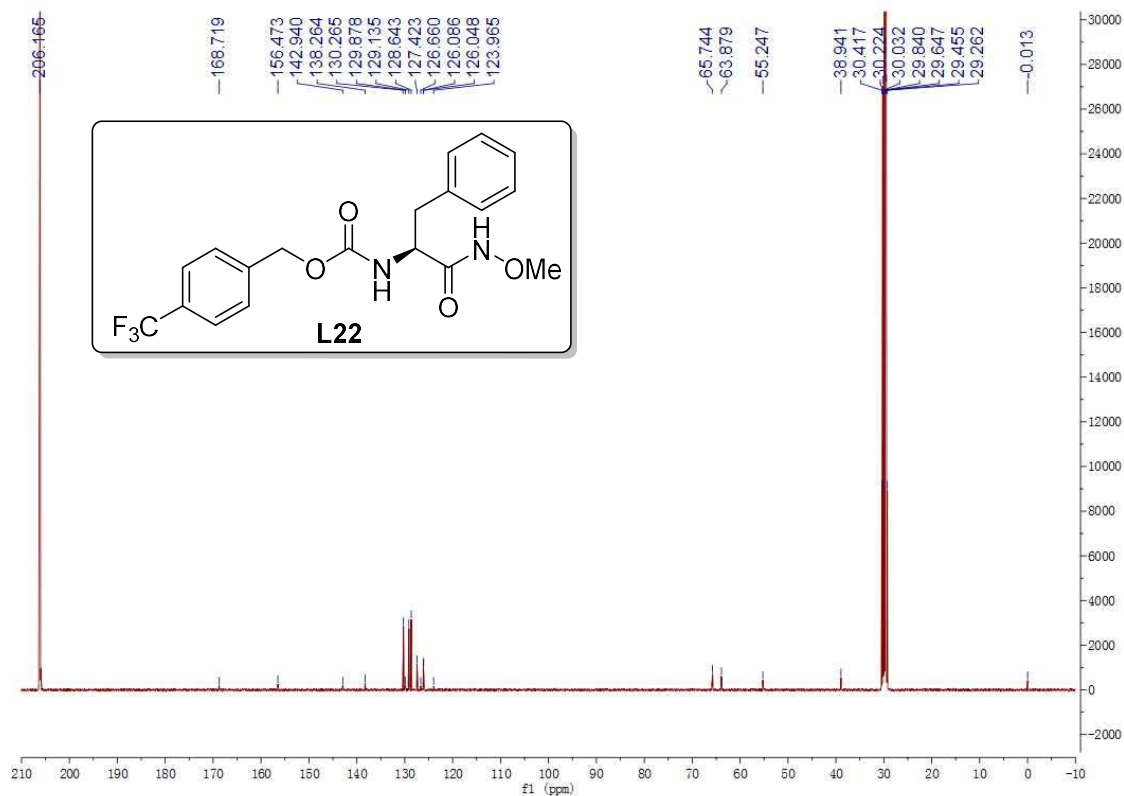

<sup>13</sup>C NMR Spectrum of L22 (Acetone-d<sub>6</sub>, 100 MHz)

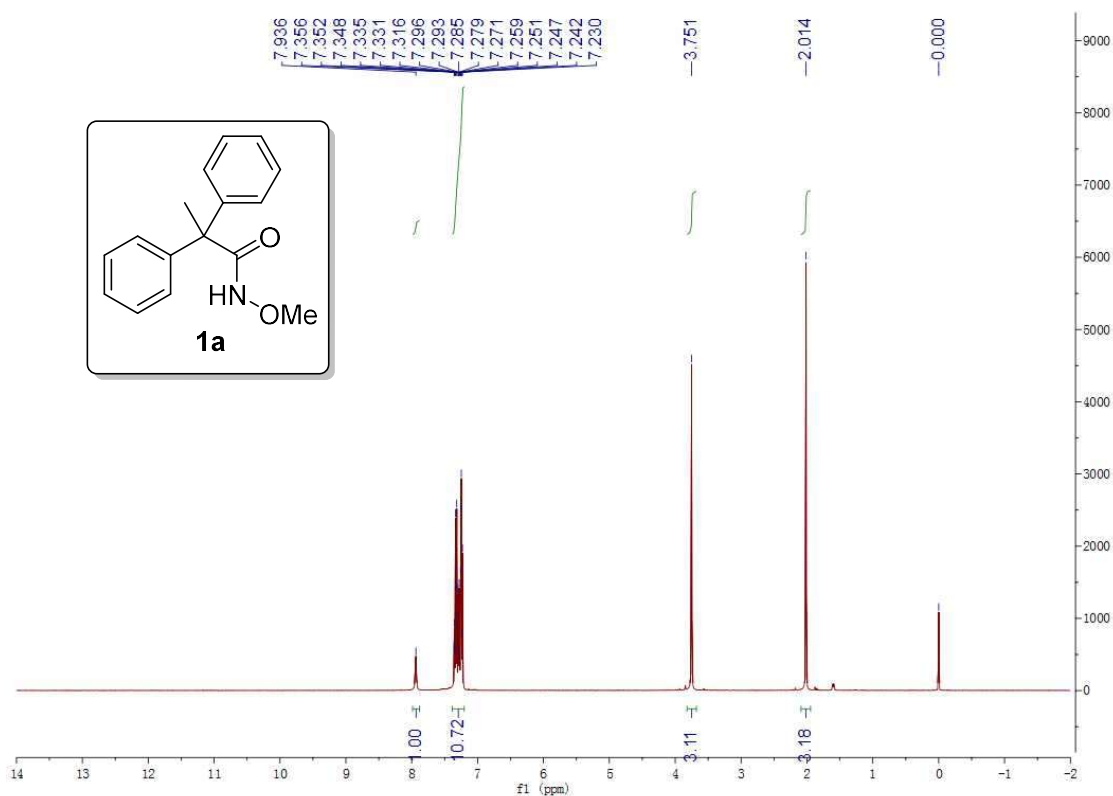

<sup>1</sup>H NMR Spectrum of **1a** (CDCl<sub>3</sub>, 400 MHz)

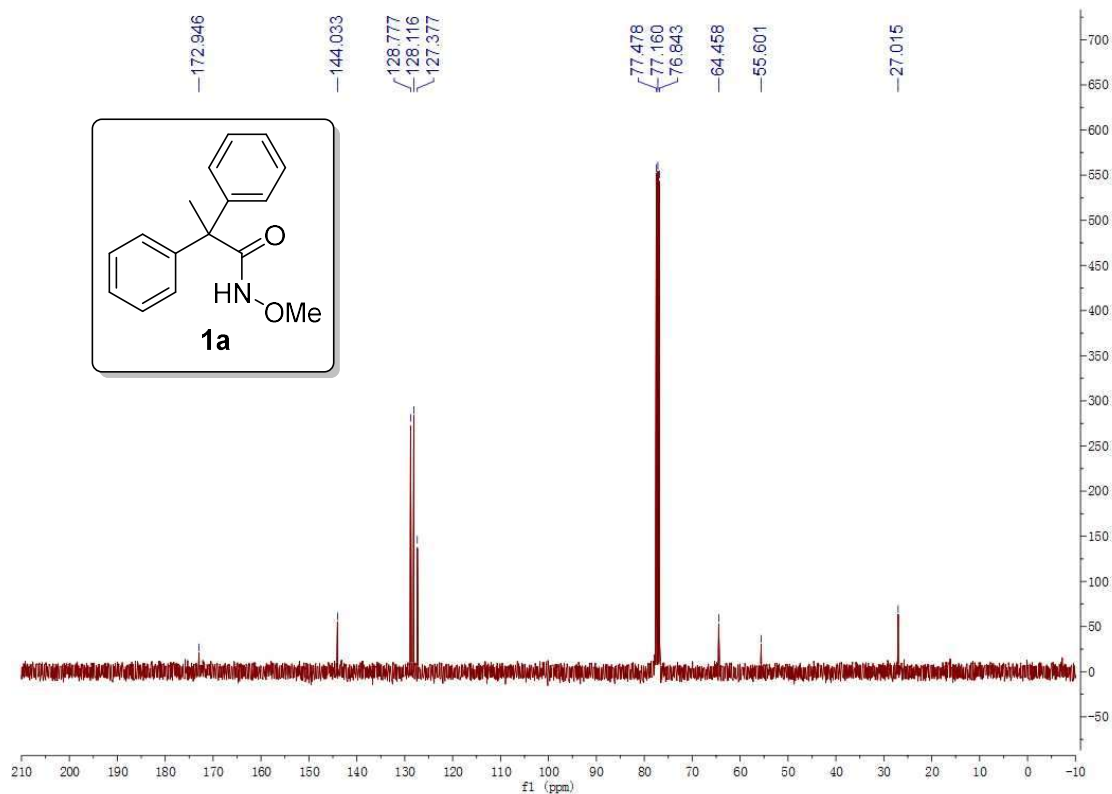

<sup>13</sup>C NMR Spectrum of **1a** (CDCl<sub>3</sub>, 100 MHz)

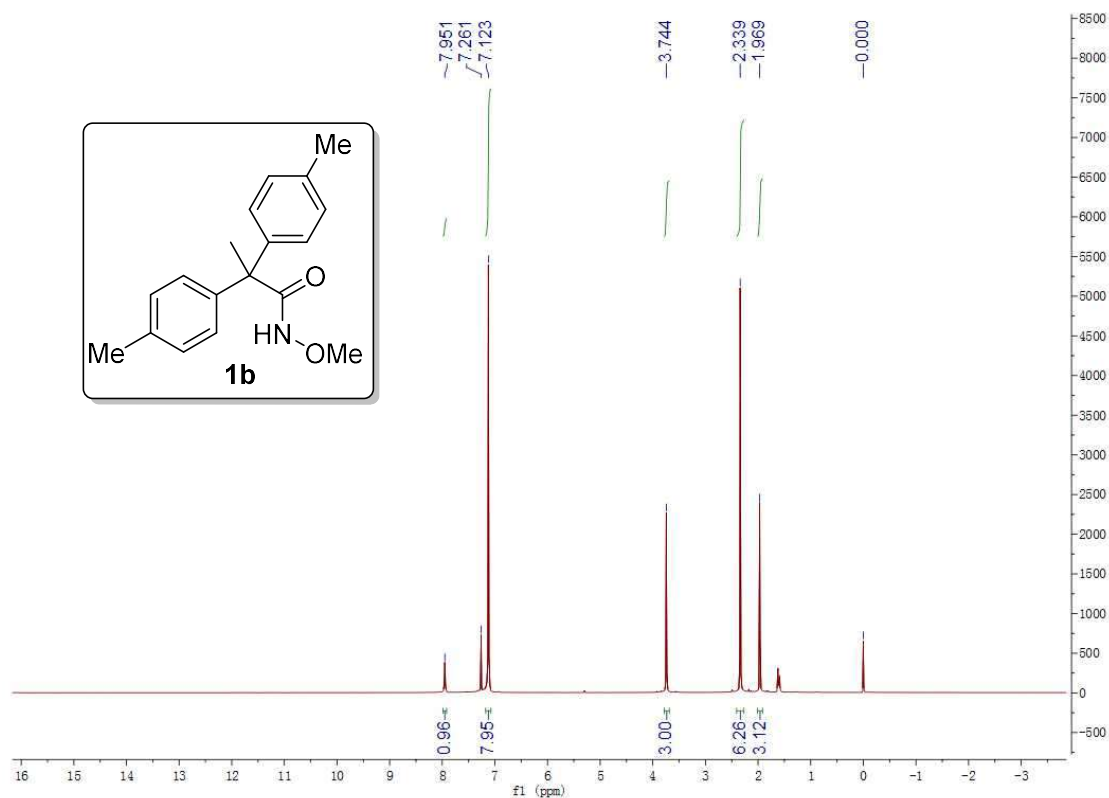

<sup>1</sup>H NMR Spectrum of **1b** (CDCl<sub>3</sub>, 400 MHz)

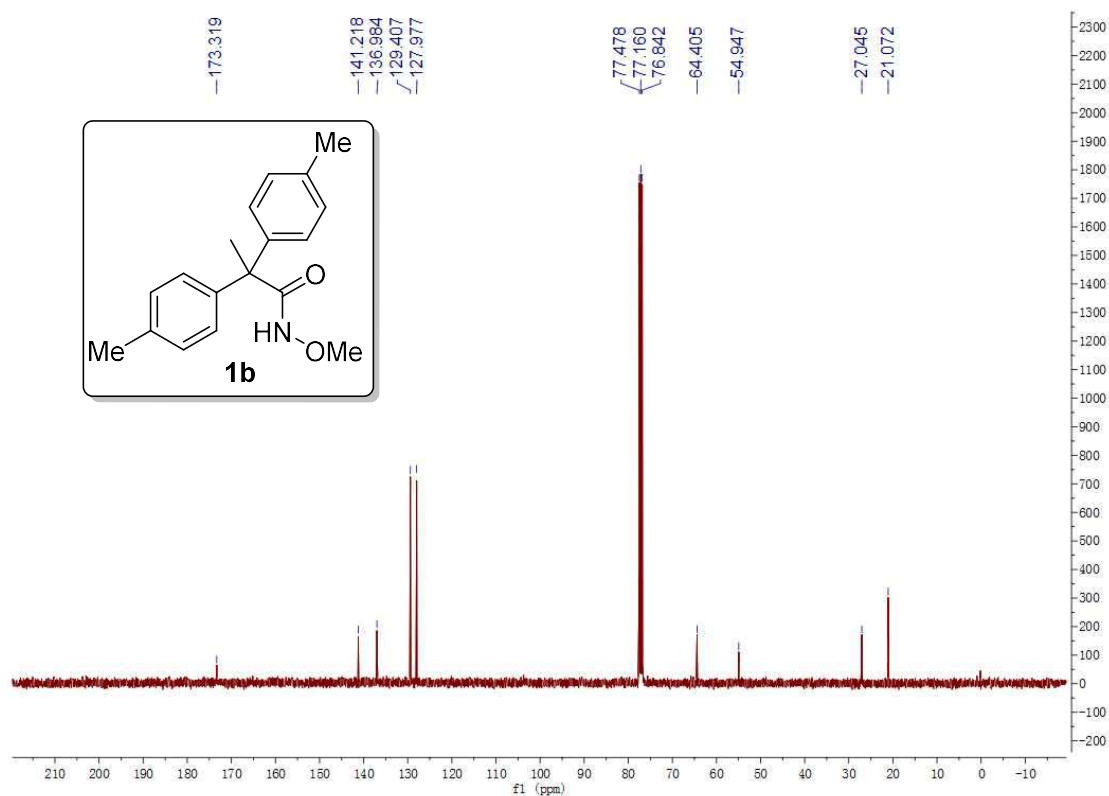

<sup>13</sup>C NMR Spectrum of **1b** (CDCl<sub>3</sub>, 100 MHz)

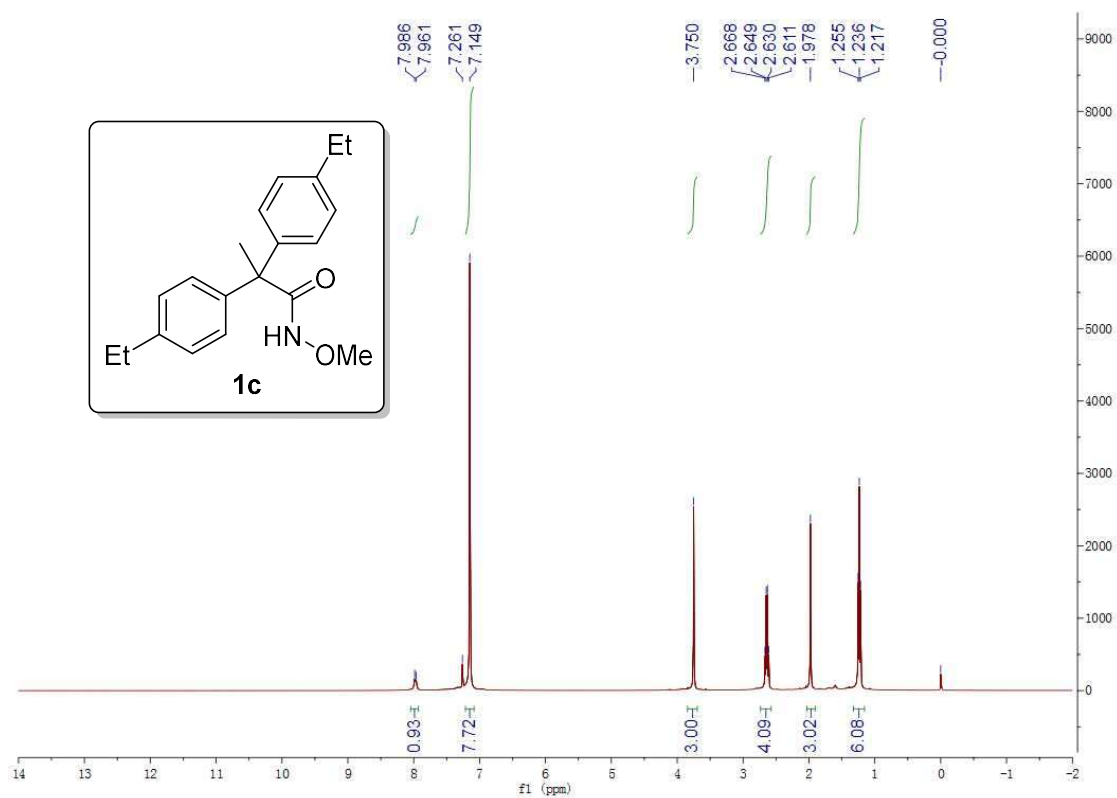

**<sup>1</sup>H NMR Spectrum of **1c** (CDCl<sub>3</sub>, 400 MHz)**

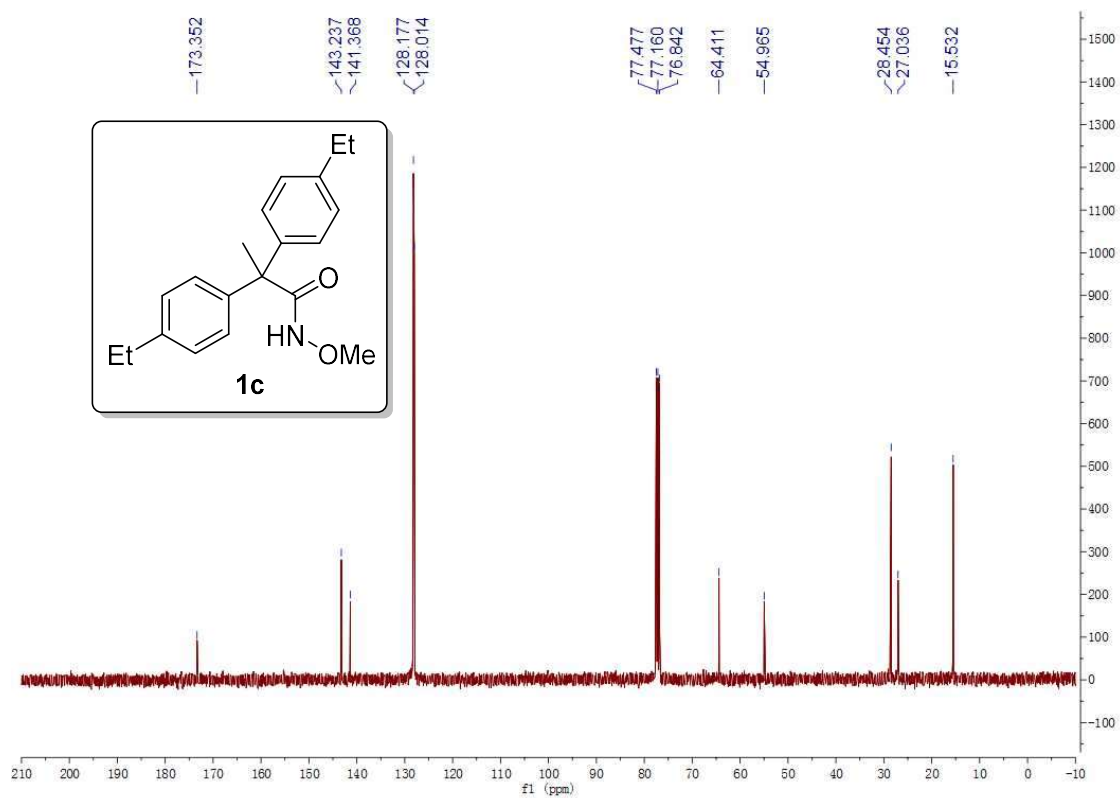

**<sup>13</sup>C NMR Spectrum of **1c** (CDCl<sub>3</sub>, 100 MHz)**

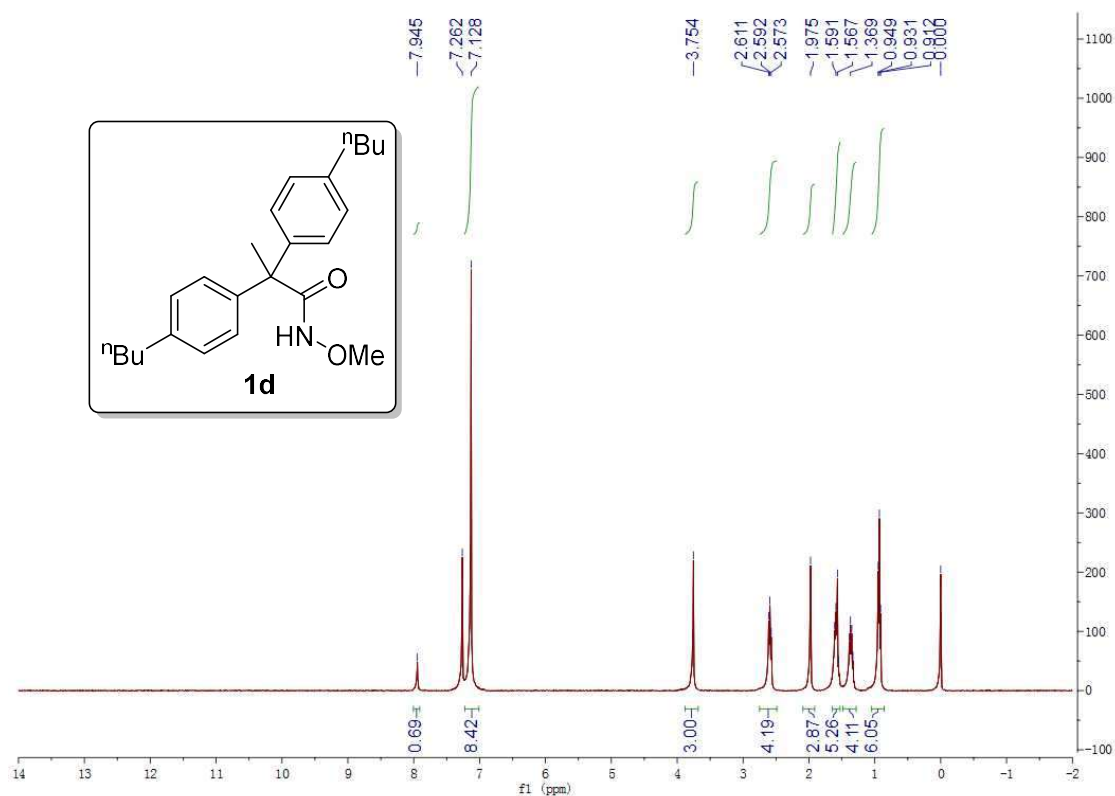

**<sup>1</sup>H NMR Spectrum of **1d** (CDCl<sub>3</sub>, 400 MHz)**

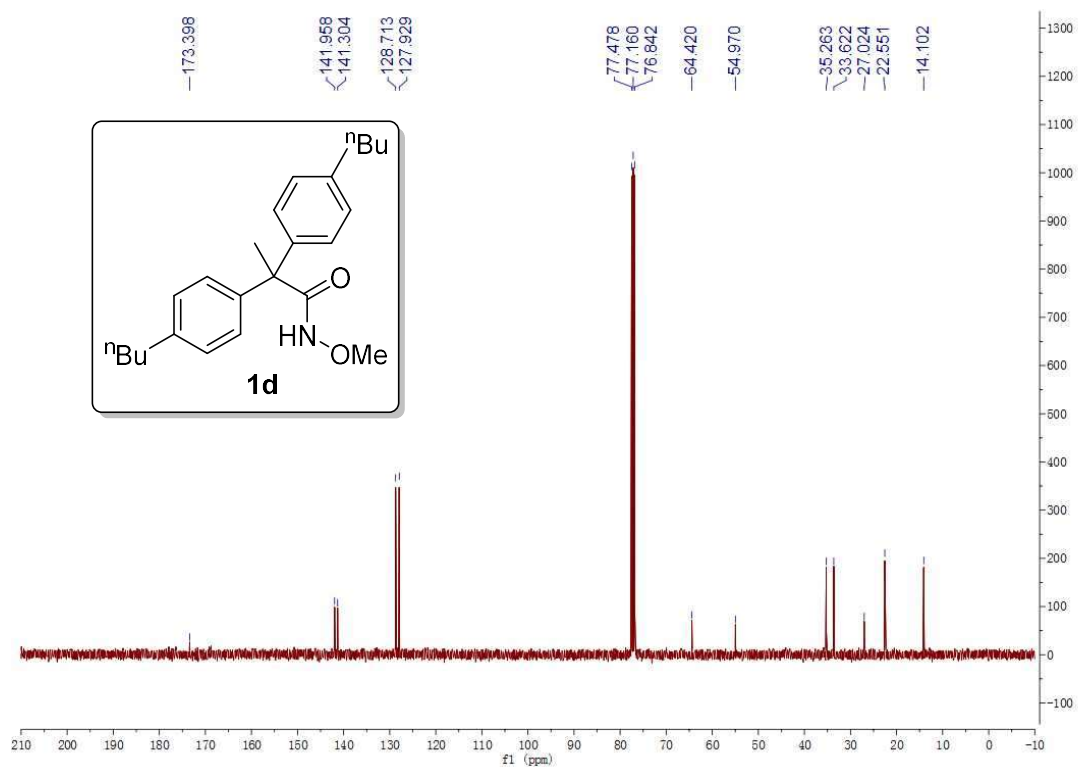

**<sup>13</sup>C NMR Spectrum of **1d** (CDCl<sub>3</sub>, 100 MHz)**

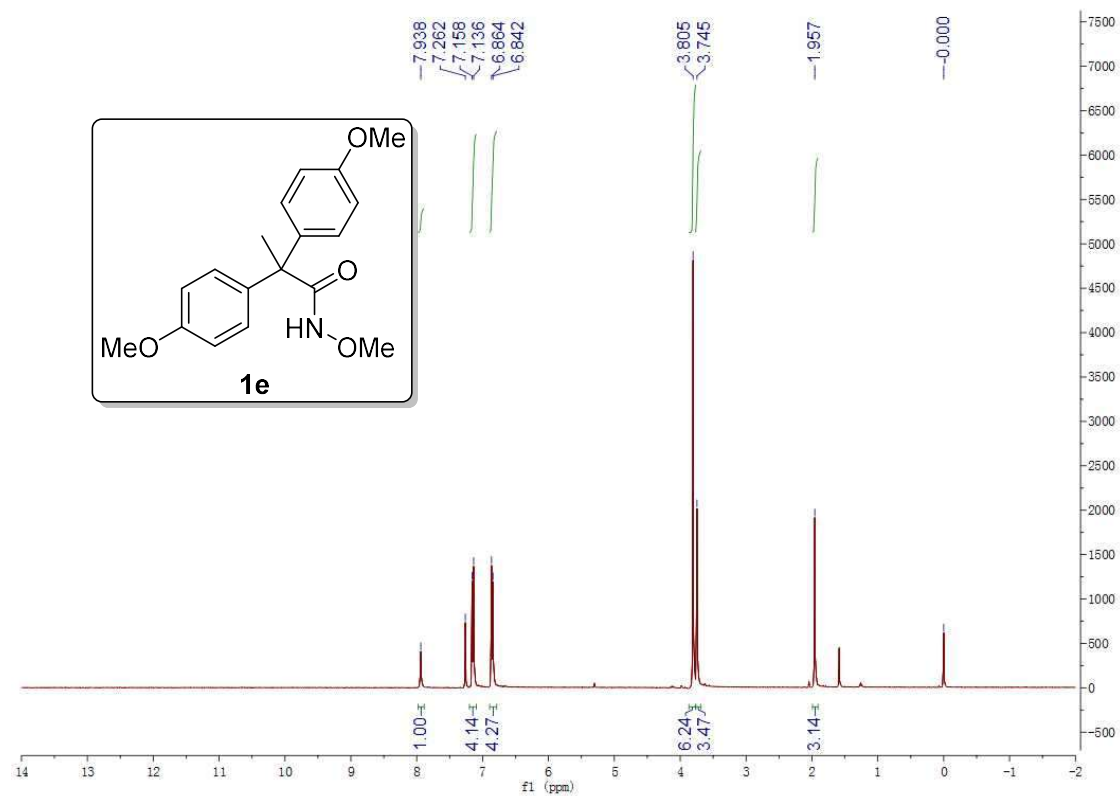

<sup>1</sup>H NMR Spectrum of **1e** (CDCl<sub>3</sub>, 400 MHz)

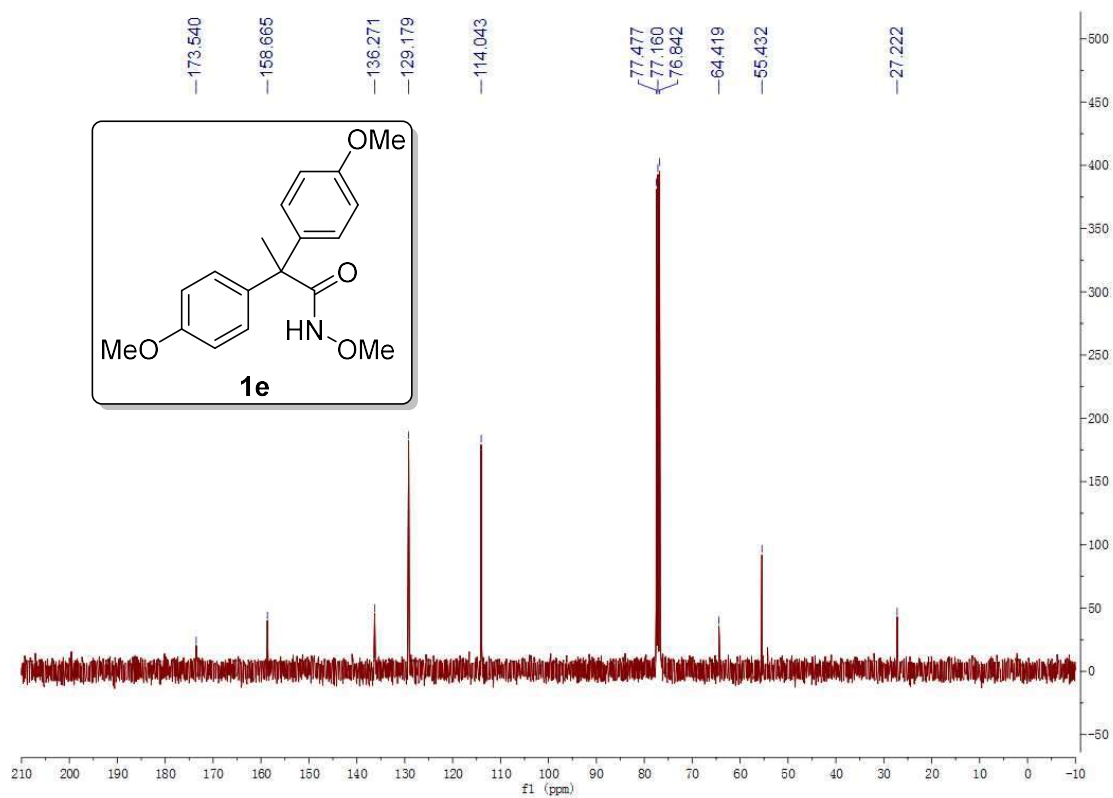

<sup>13</sup>C NMR Spectrum of **1e** (CDCl<sub>3</sub>, 100 MHz)

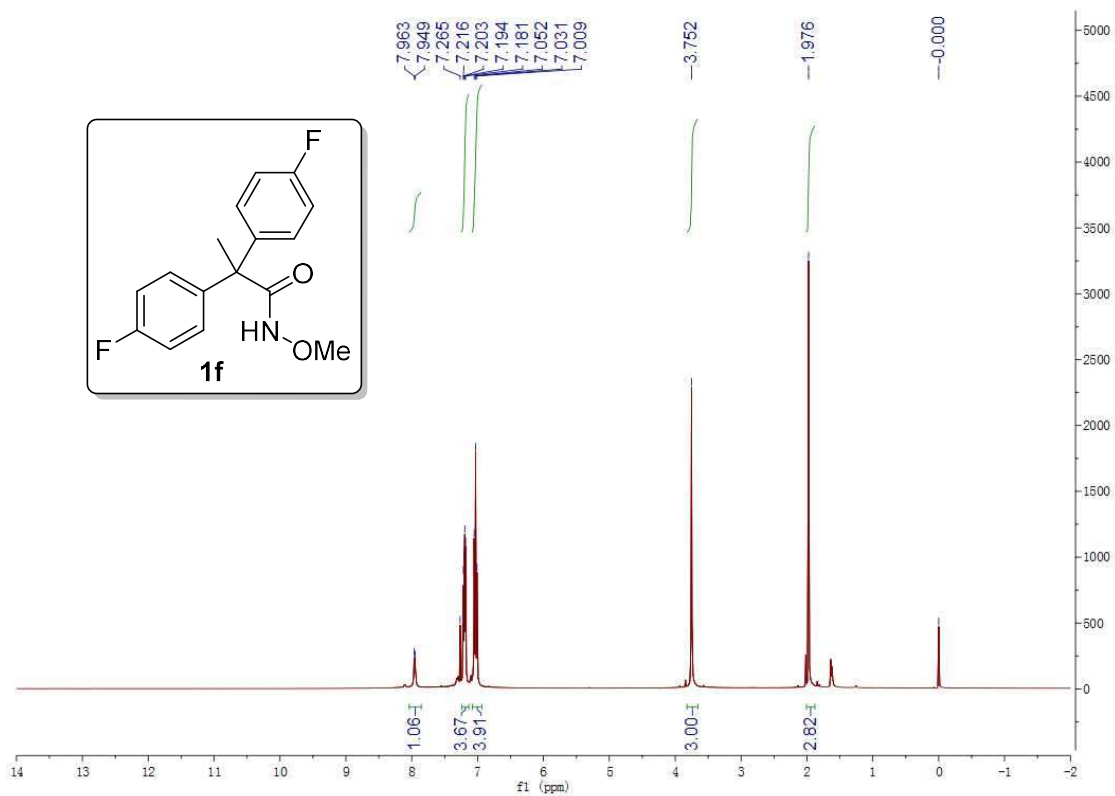

**<sup>1</sup>H NMR Spectrum of 1f (CDCl<sub>3</sub>, 400 MHz)**

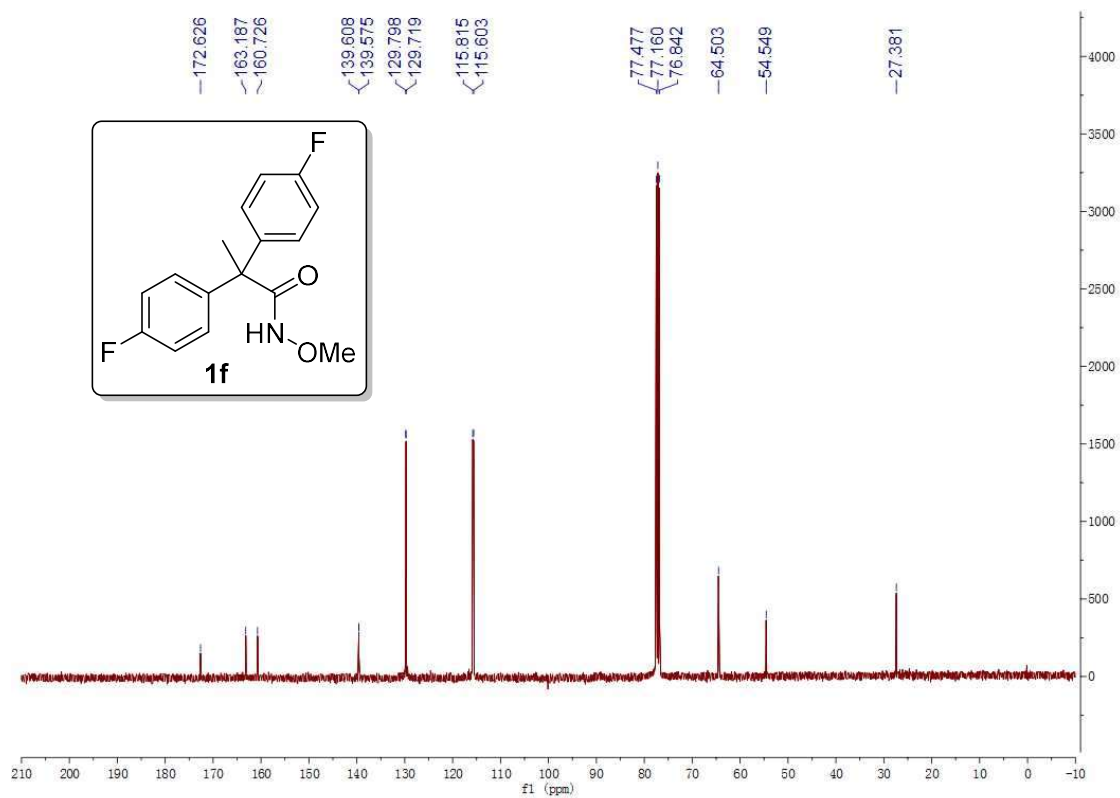

**<sup>13</sup>C NMR Spectrum of 1f (CDCl<sub>3</sub>, 100 MHz)**



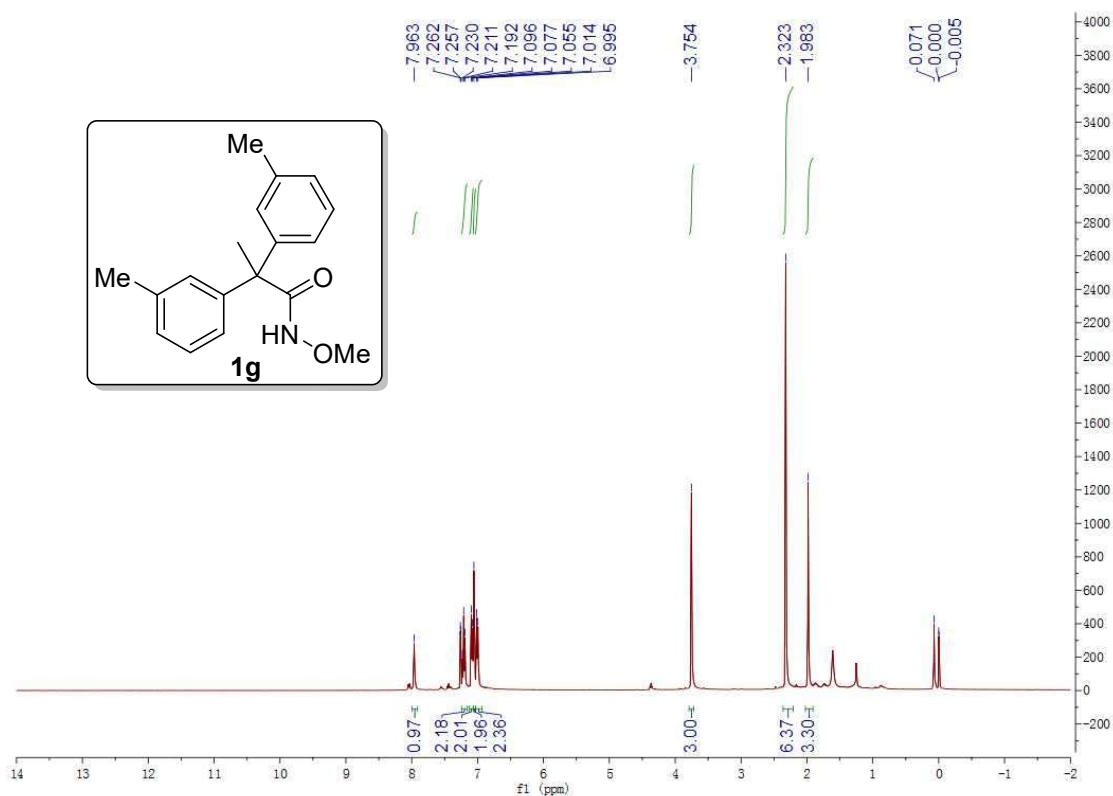

**<sup>1</sup>H NMR Spectrum of **1g** (CDCl<sub>3</sub>, 400 MHz)**

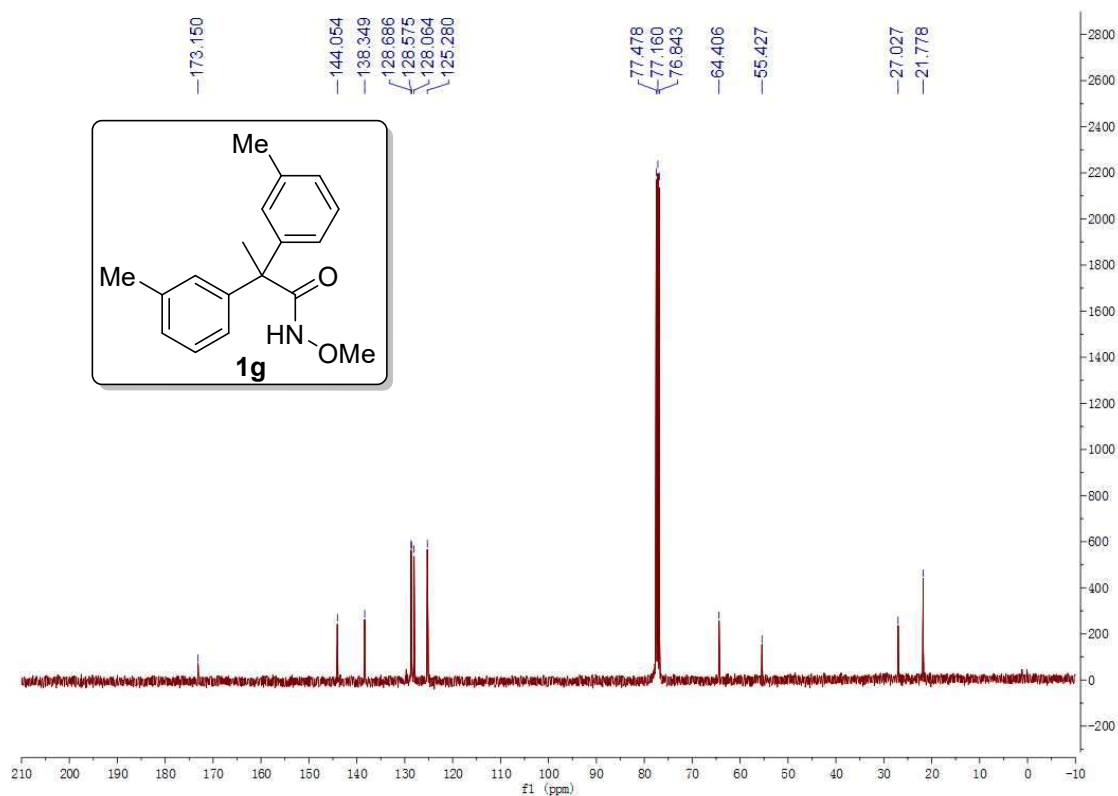

**<sup>13</sup>C NMR Spectrum of **1g** (CDCl<sub>3</sub>, 100 MHz)**

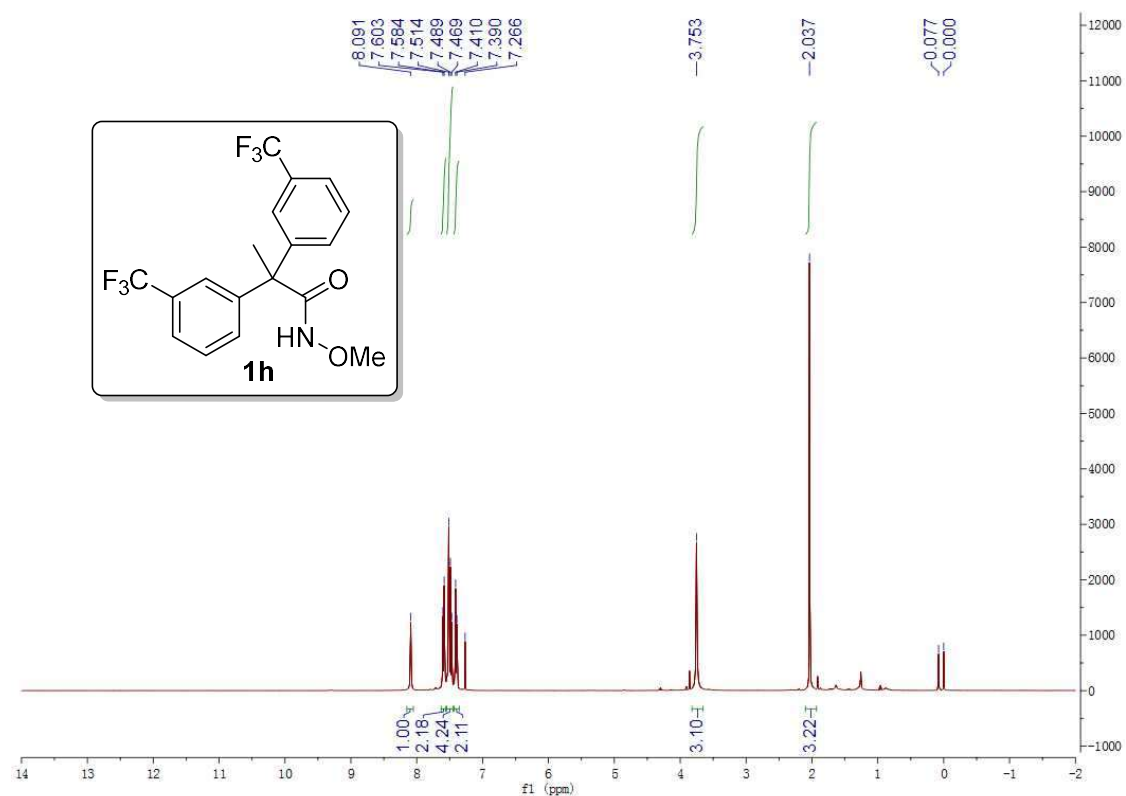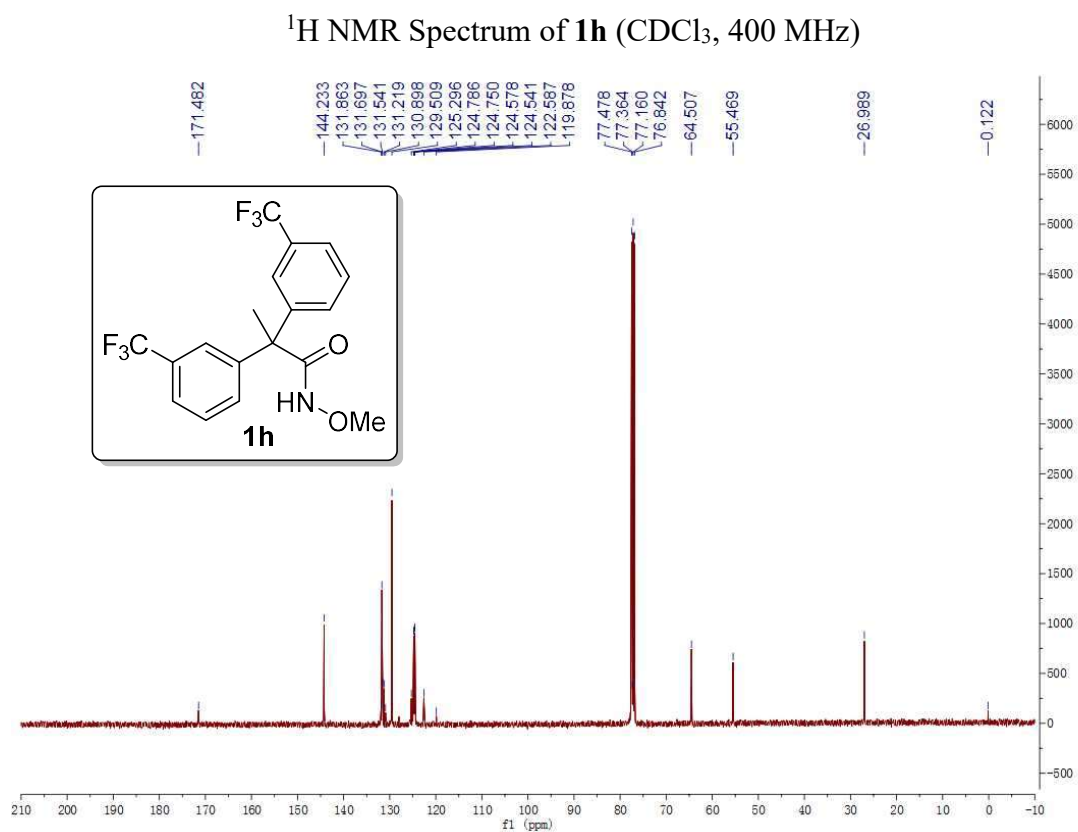

**<sup>13</sup>C NMR Spectrum of **1h** (CDCl<sub>3</sub>, 100 MHz)**

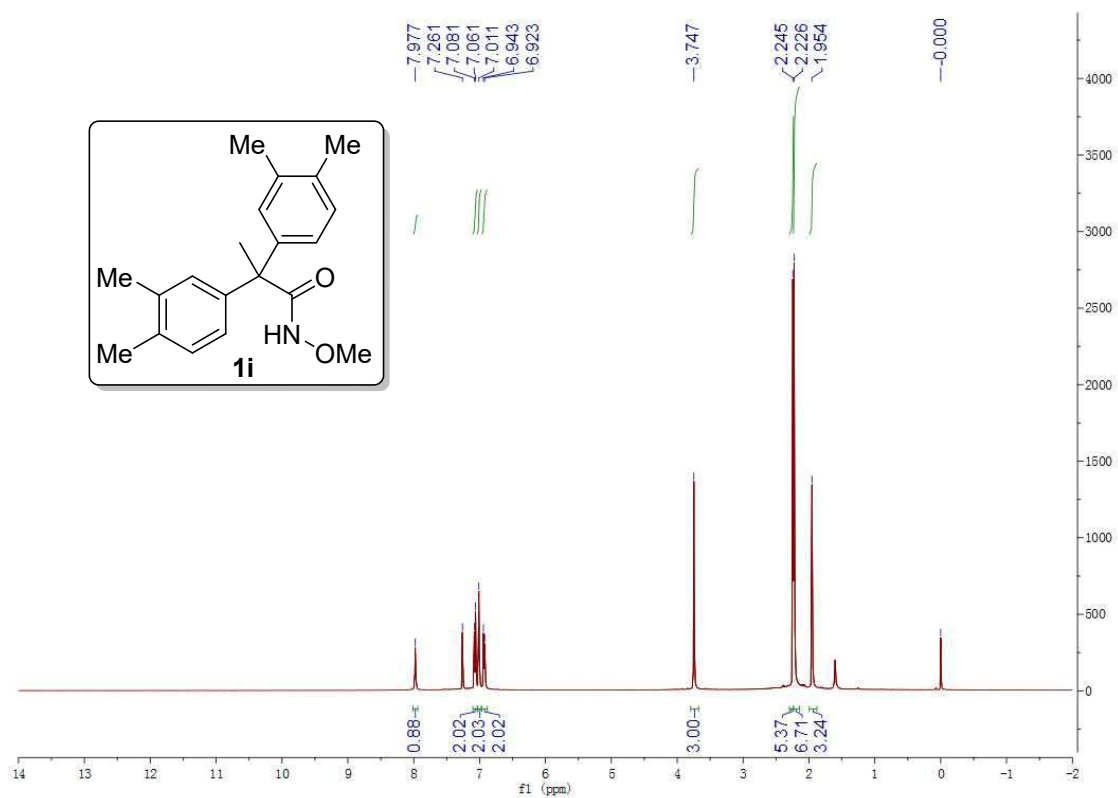

<sup>1</sup>H NMR Spectrum of **1i** (CDCl<sub>3</sub>, 400 MHz)

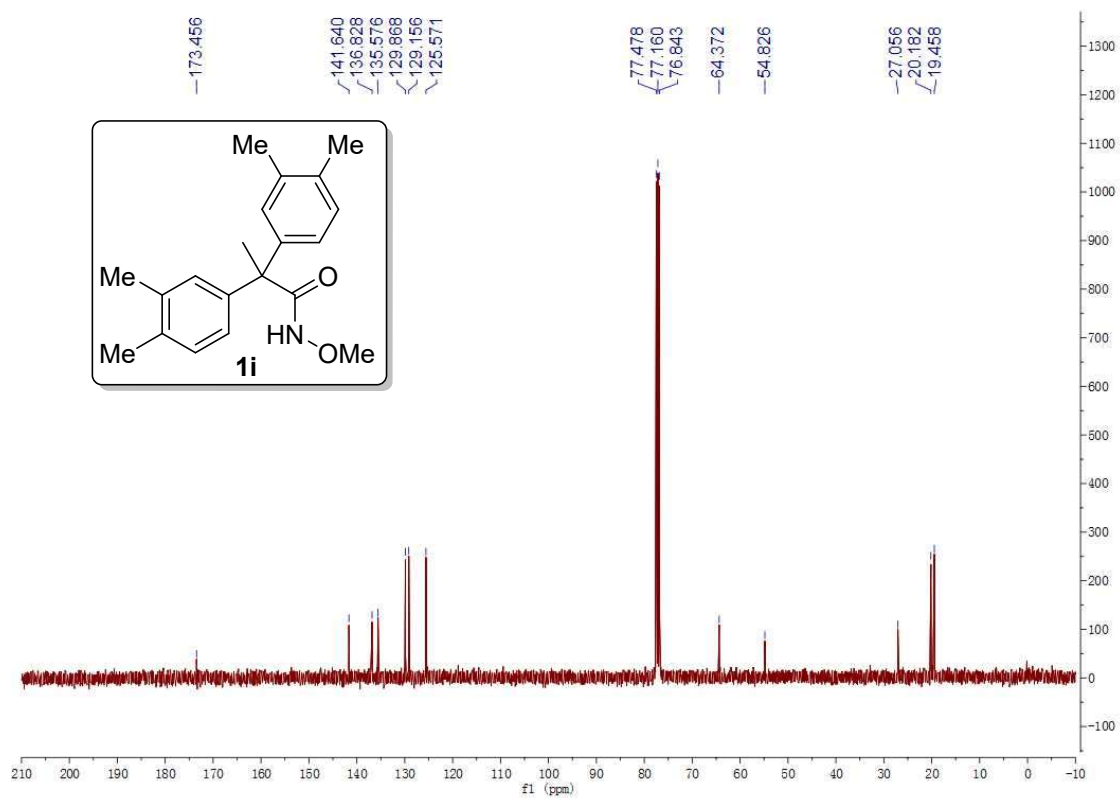

<sup>13</sup>C NMR Spectrum of **1i** (CDCl<sub>3</sub>, 100 MHz)

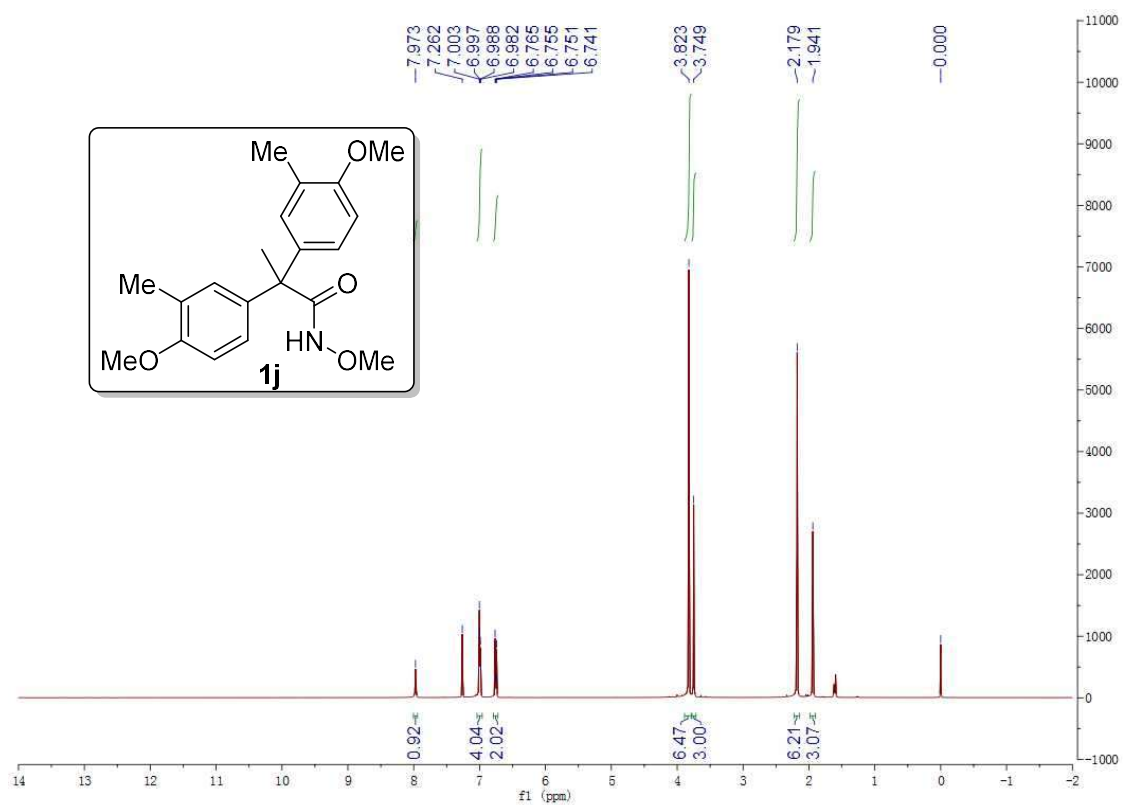

**<sup>1</sup>H NMR Spectrum of **1j** (CDCl<sub>3</sub>, 400 MHz)**

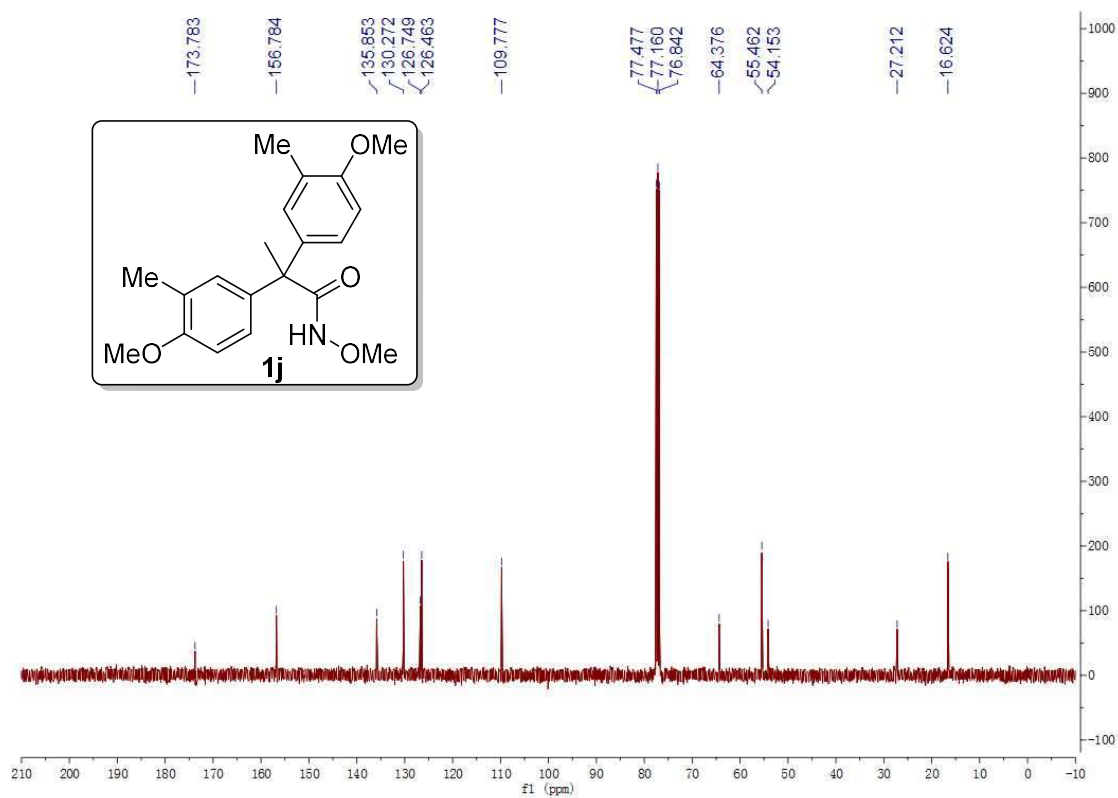

**<sup>13</sup>C NMR Spectrum of **1j** (CDCl<sub>3</sub>, 100 MHz)**

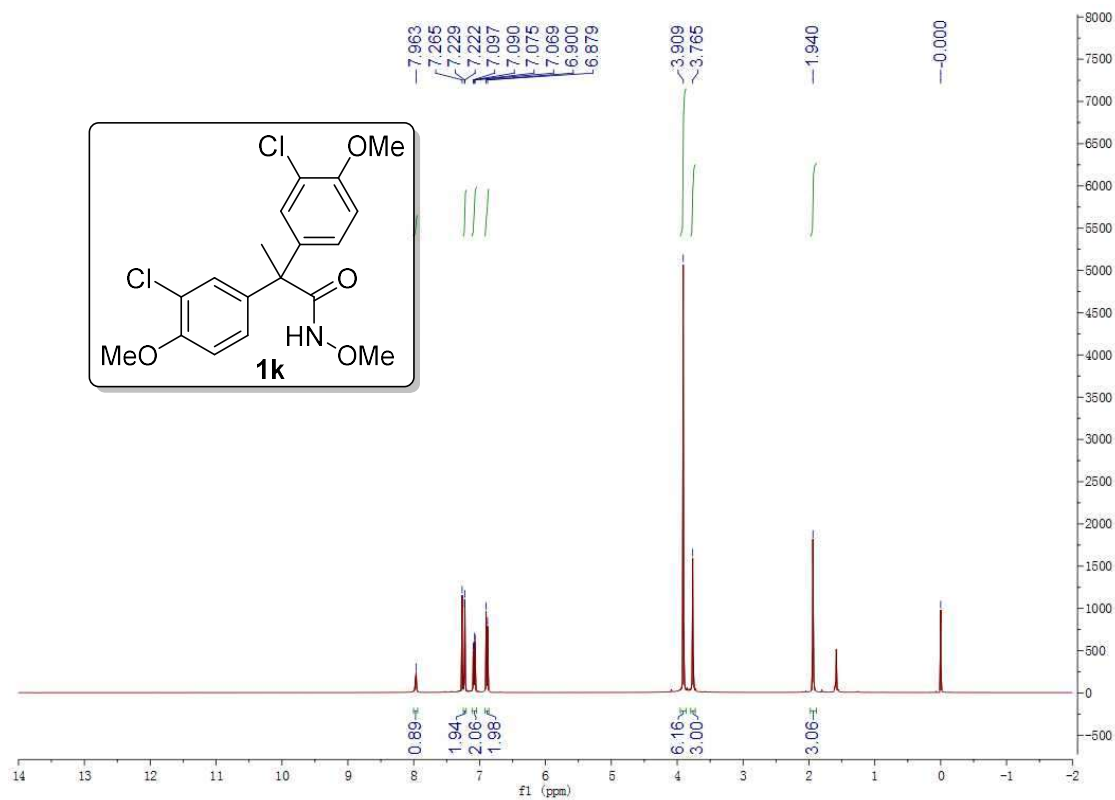

<sup>1</sup>H NMR Spectrum of **1k** (CDCl<sub>3</sub>, 400 MHz)

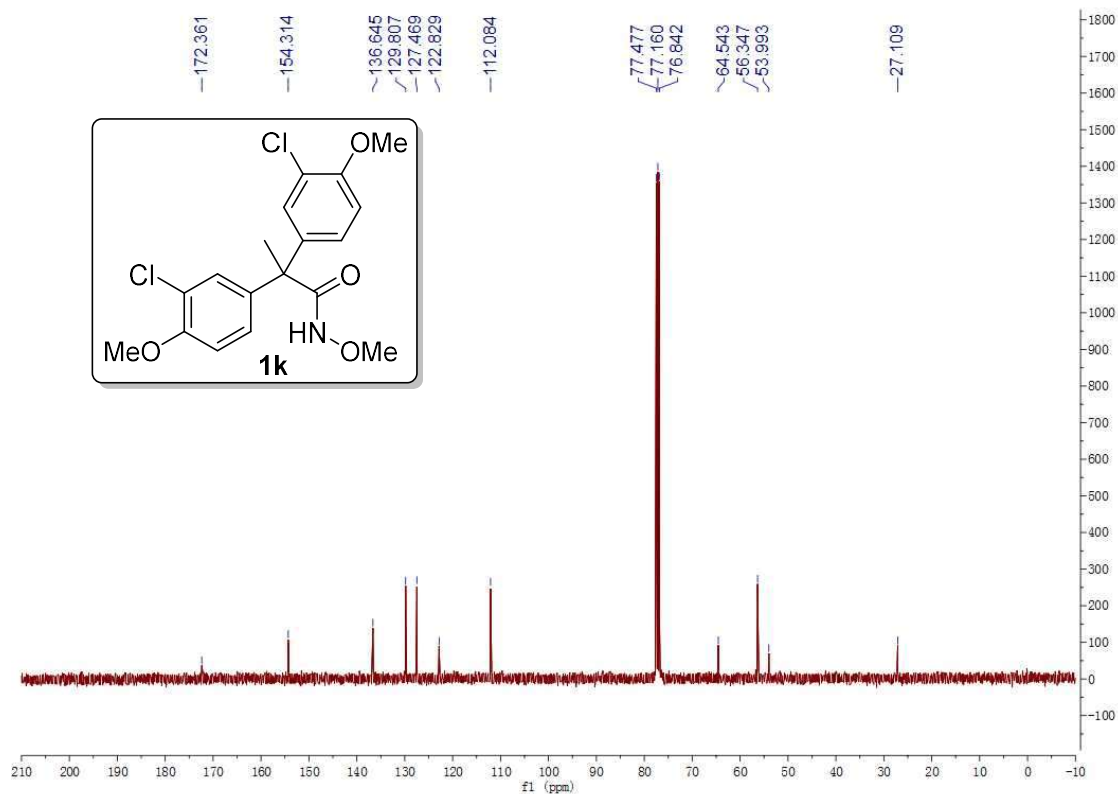

<sup>13</sup>C NMR Spectrum of **1k** (CDCl<sub>3</sub>, 100 MHz)

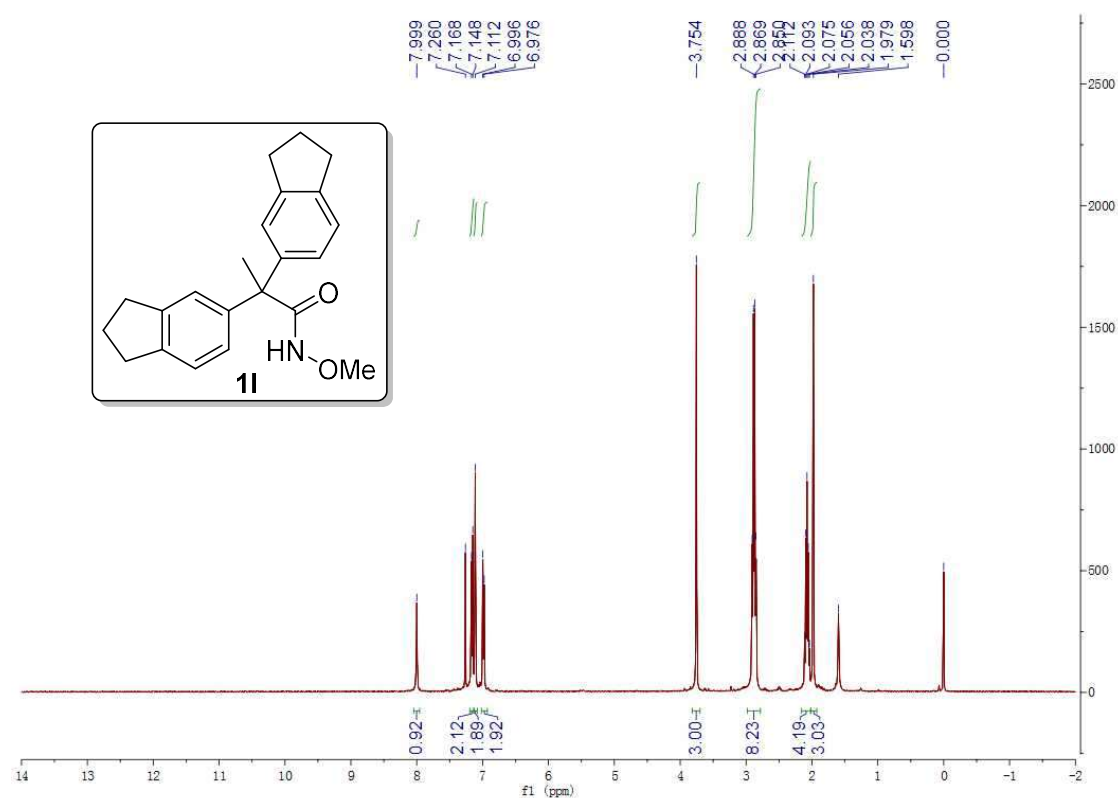

<sup>1</sup>H NMR Spectrum of **11** (CDCl<sub>3</sub>, 400 MHz)

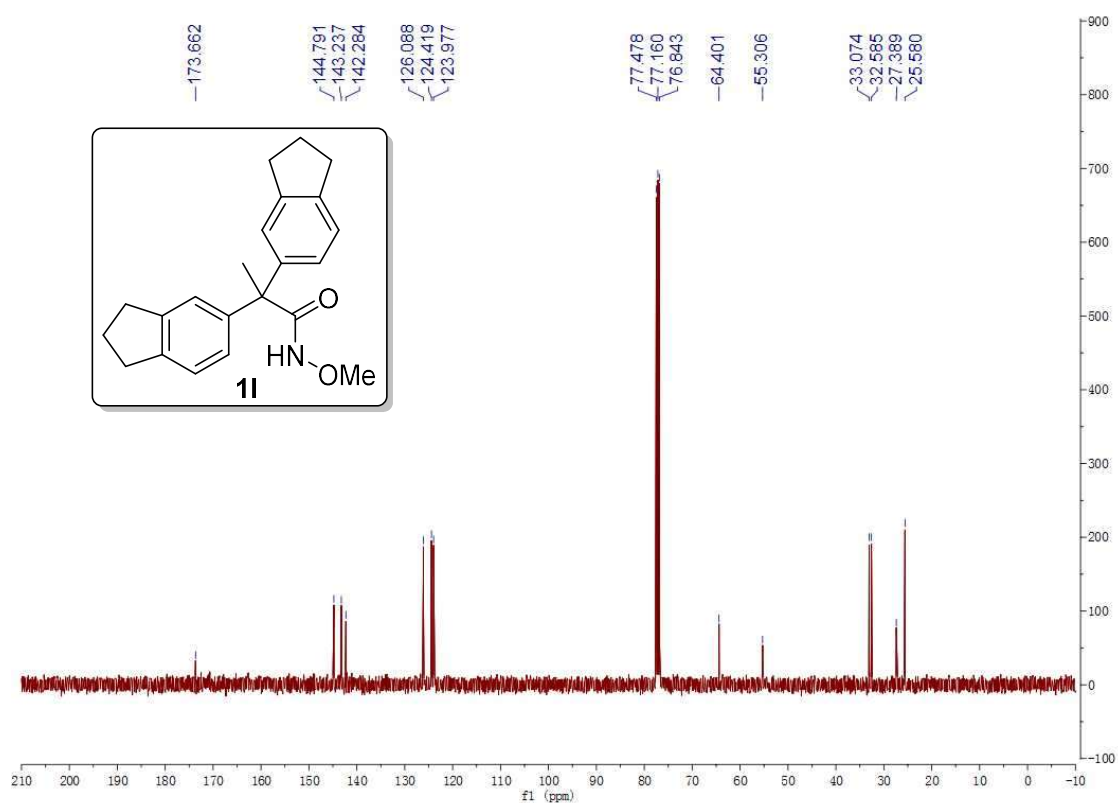

<sup>13</sup>C NMR Spectrum of **11** (CDCl<sub>3</sub>, 100 MHz)

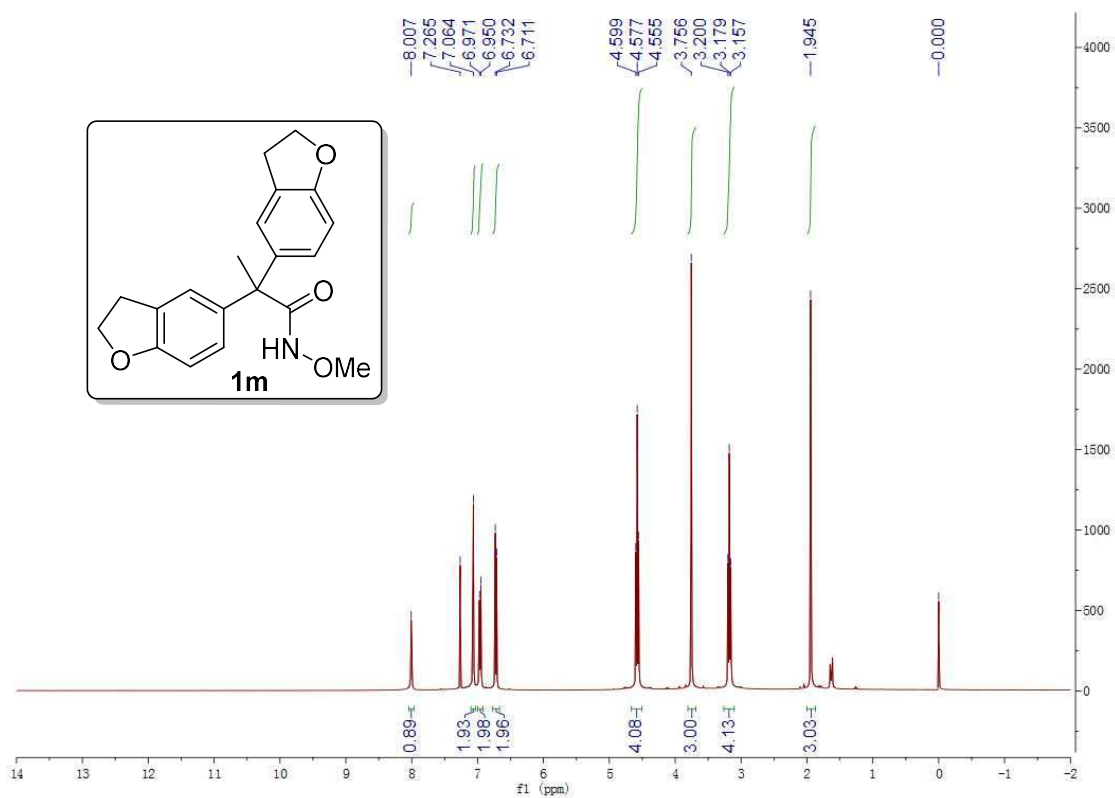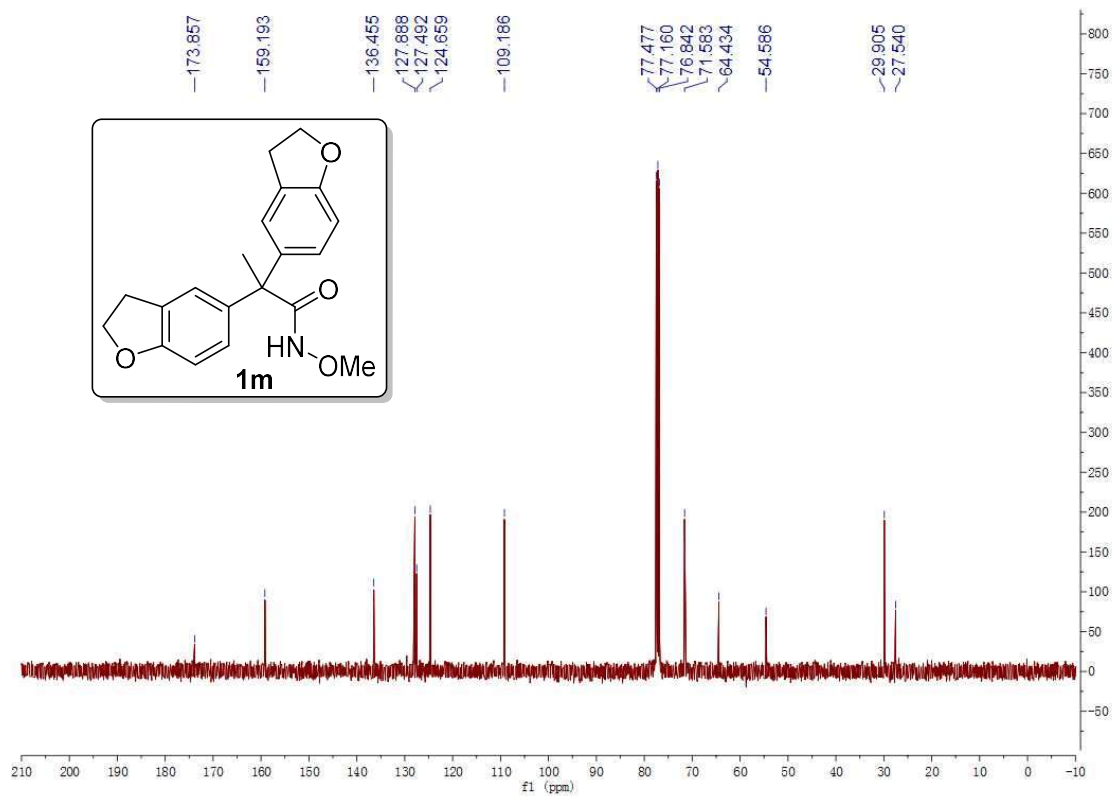

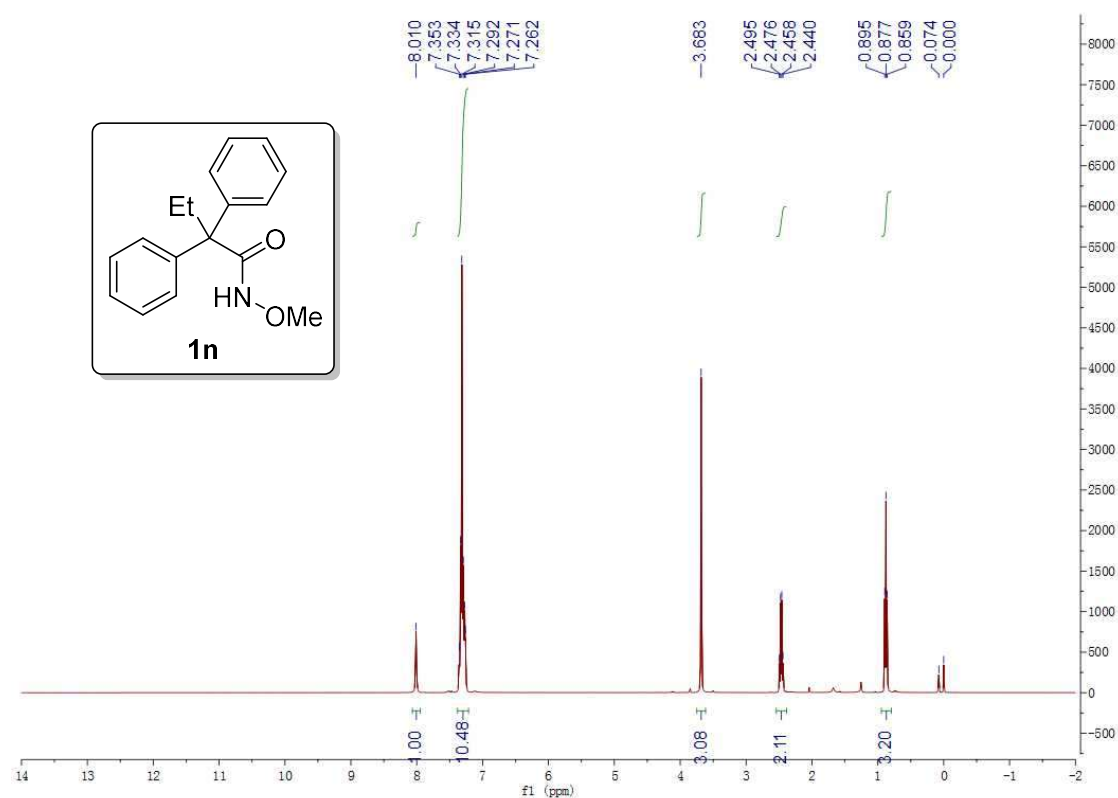

<sup>1</sup>H NMR Spectrum of **1n** (CDCl<sub>3</sub>, 400 MHz)

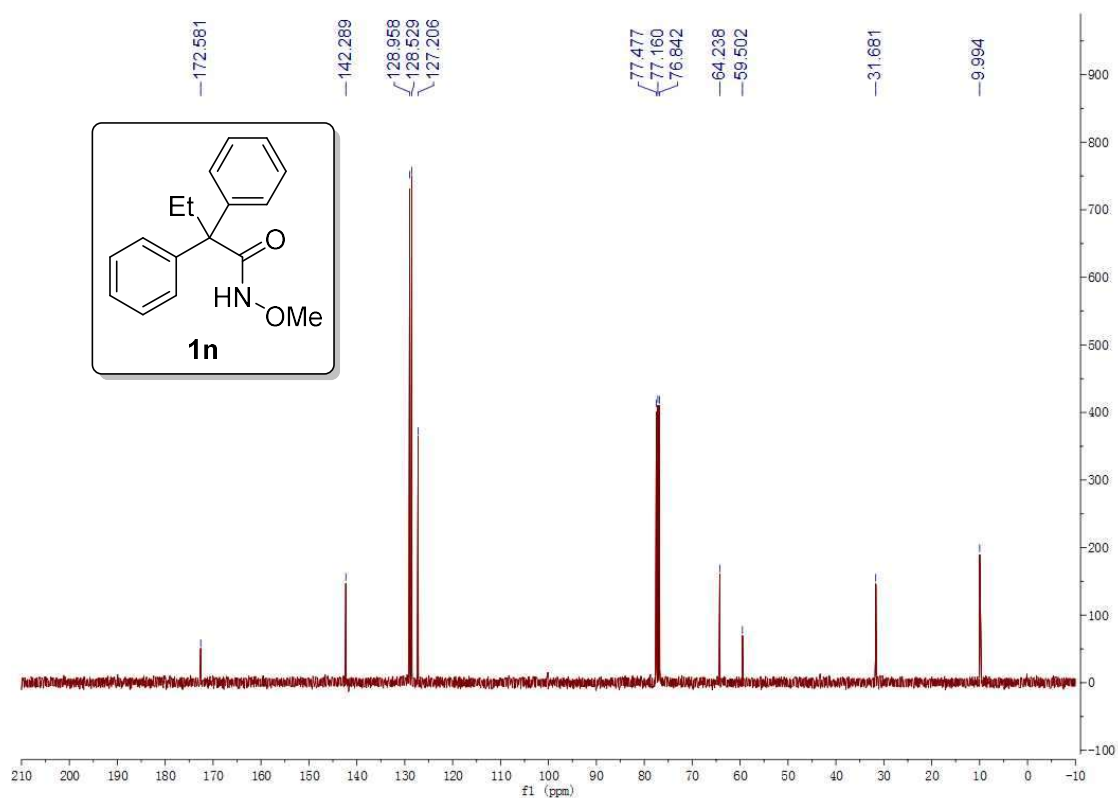

<sup>13</sup>C NMR Spectrum of **1n** (CDCl<sub>3</sub>, 100 MHz)



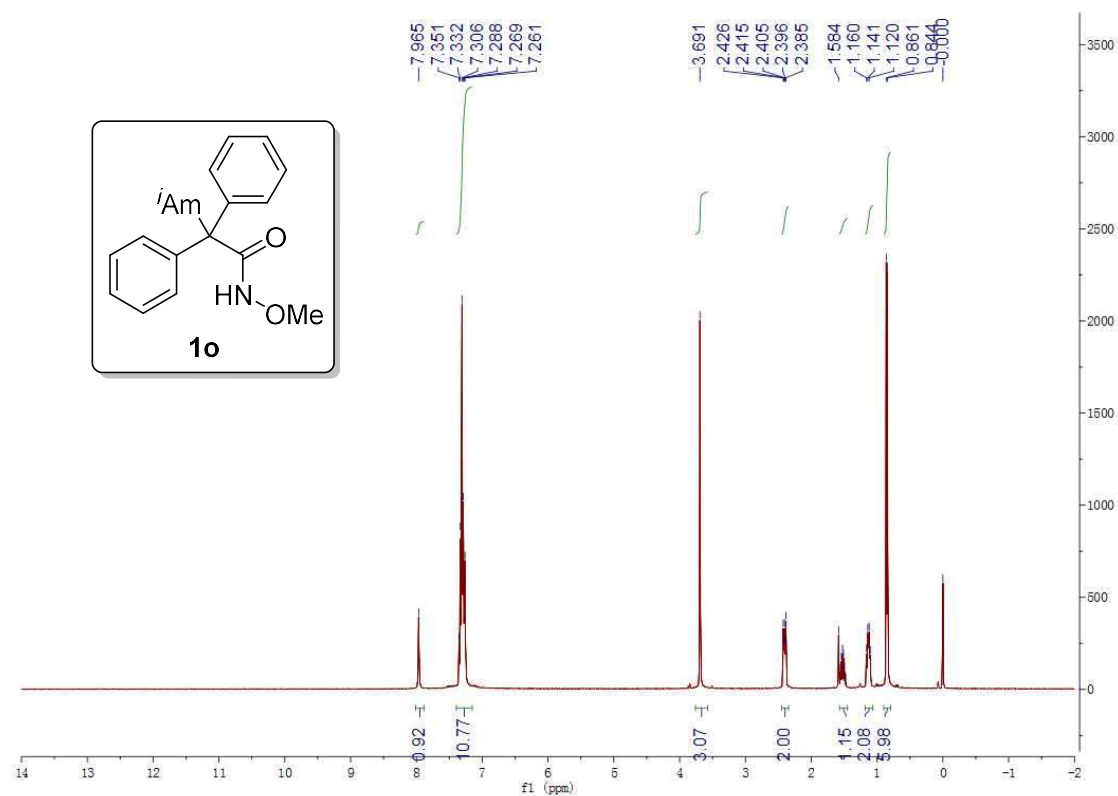

<sup>1</sup>H NMR Spectrum of **1o** (CDCl<sub>3</sub>, 400 MHz)

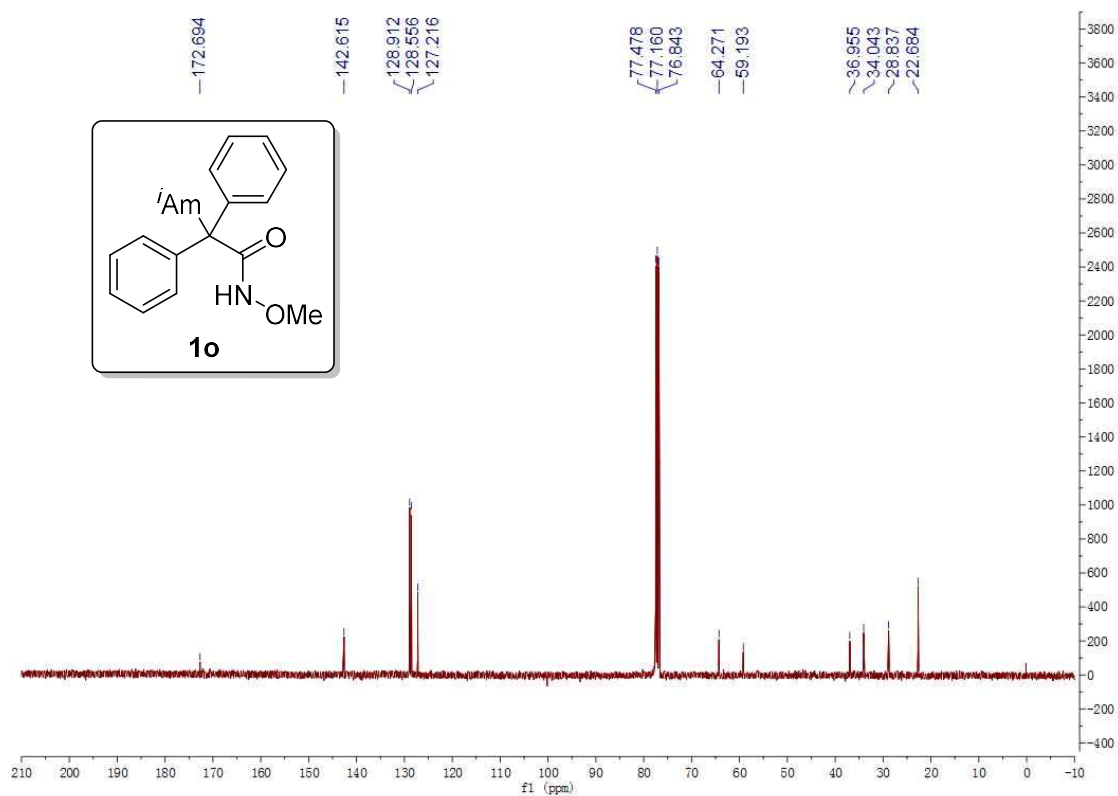

<sup>13</sup>C NMR Spectrum of **1o** (CDCl<sub>3</sub>, 100 MHz)

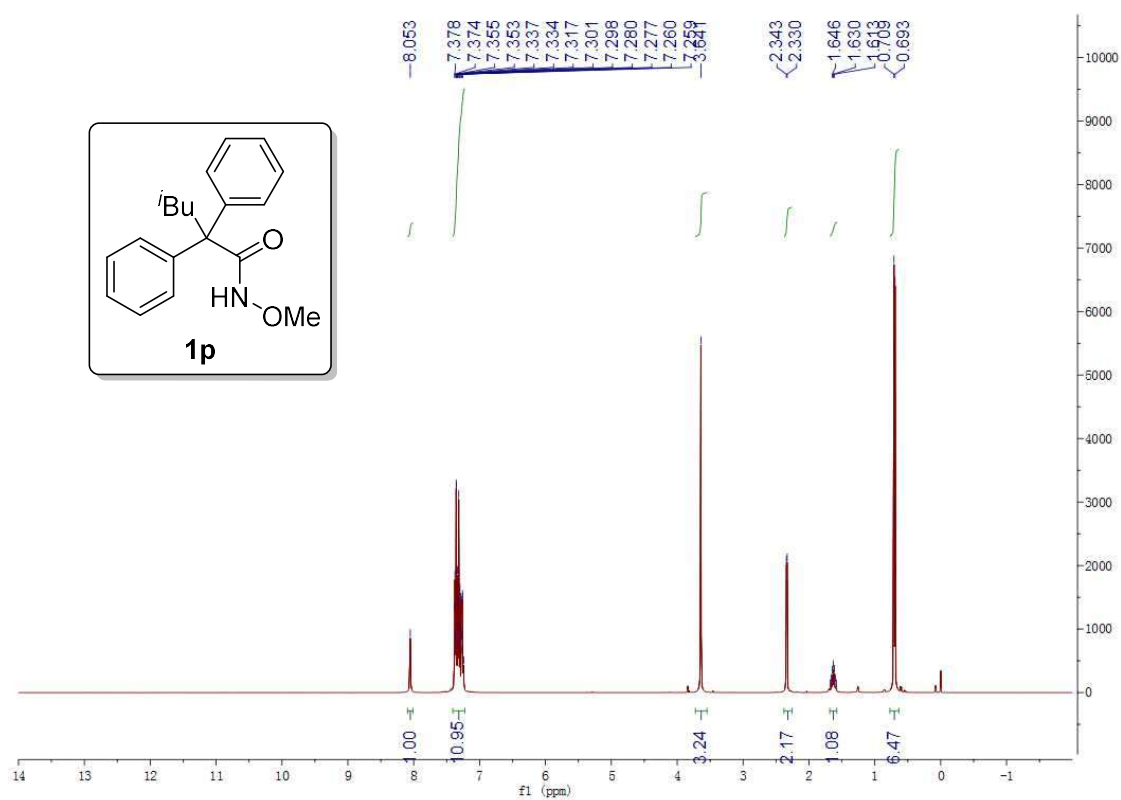

<sup>1</sup>H NMR Spectrum of **1p** (CDCl<sub>3</sub>, 400 MHz)

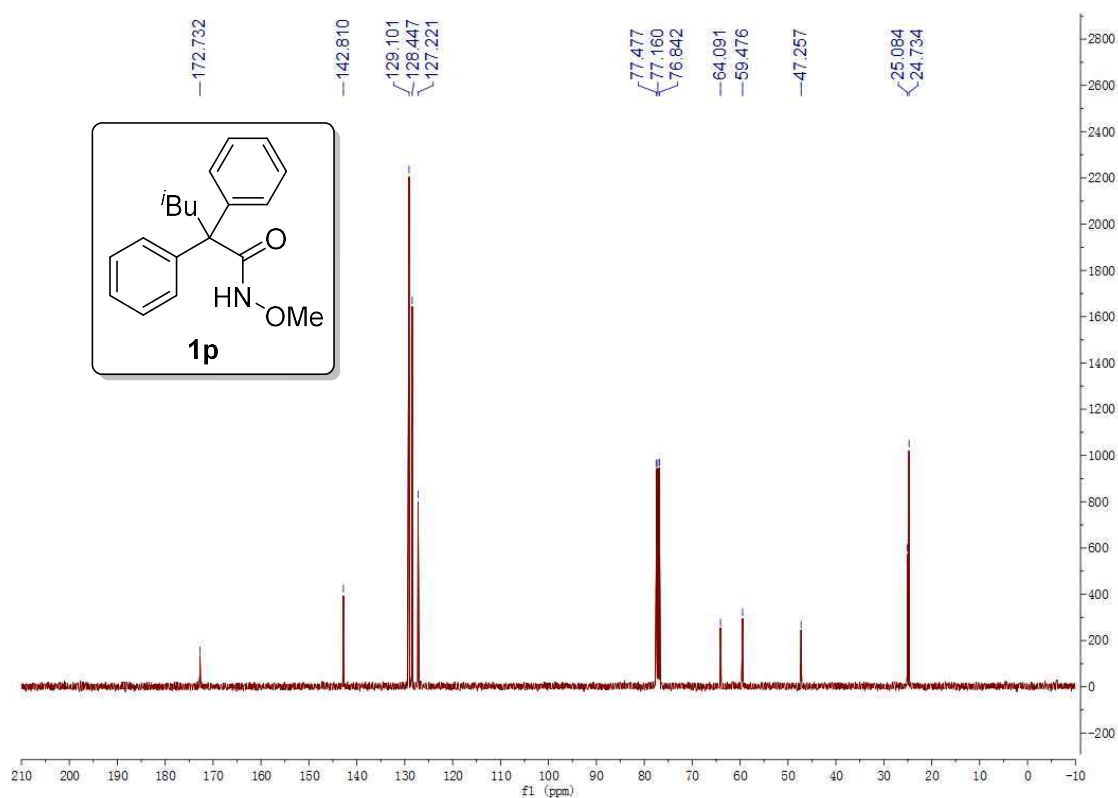

<sup>13</sup>C NMR Spectrum of **1p** (CDCl<sub>3</sub>, 100 MHz)

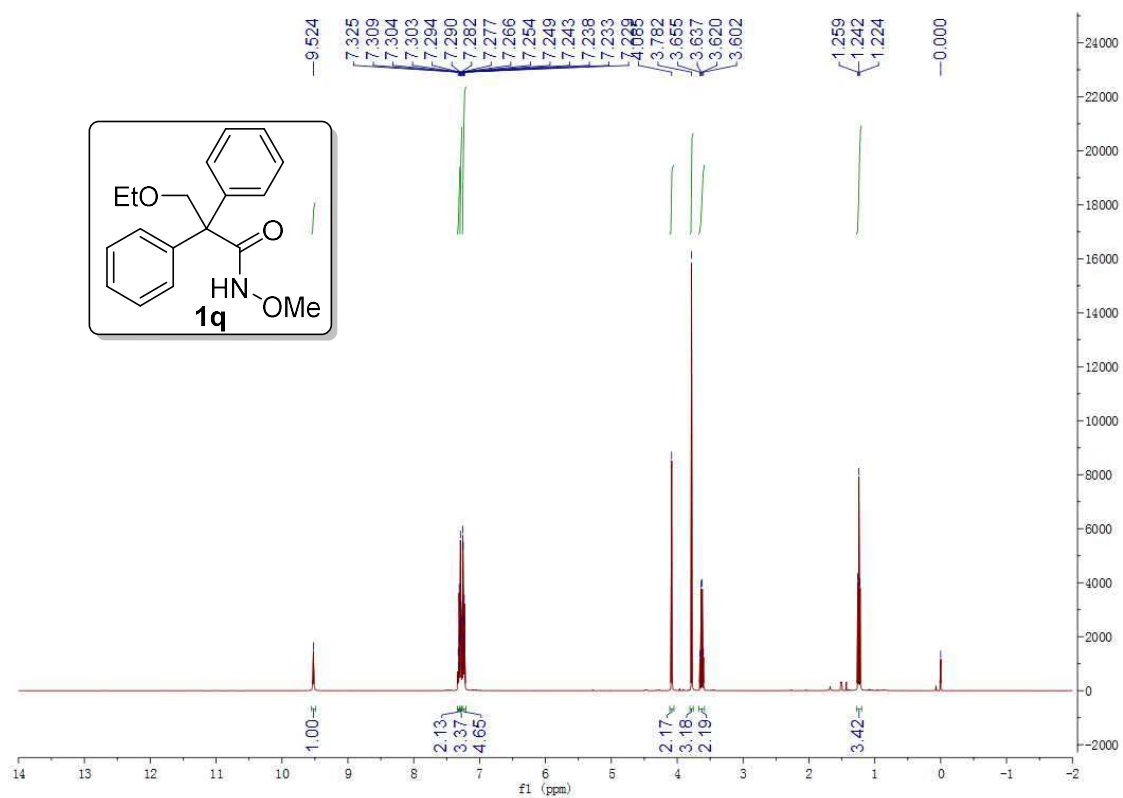

<sup>1</sup>H NMR Spectrum of **1q** (CDCl<sub>3</sub>, 400 MHz)

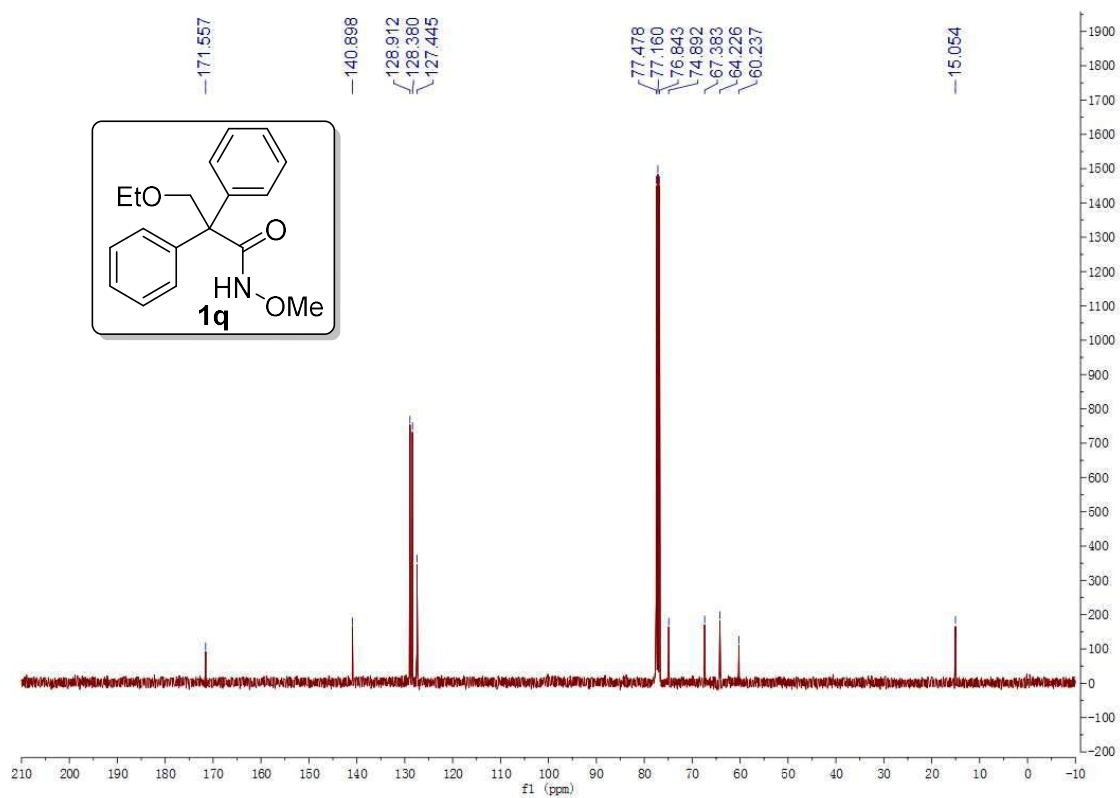

<sup>13</sup>C NMR Spectrum of **1q** (CDCl<sub>3</sub>, 100 MHz)

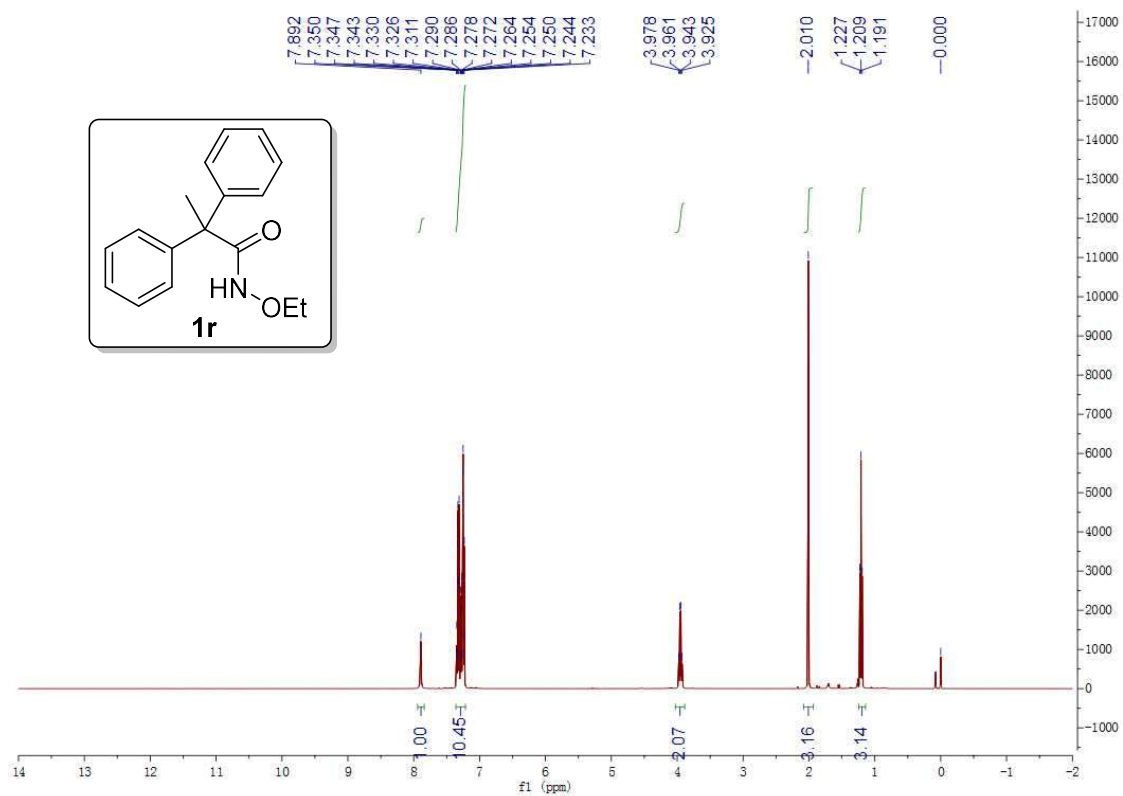

**<sup>1</sup>H NMR Spectrum of **1r** (CDCl<sub>3</sub>, 400 MHz)**

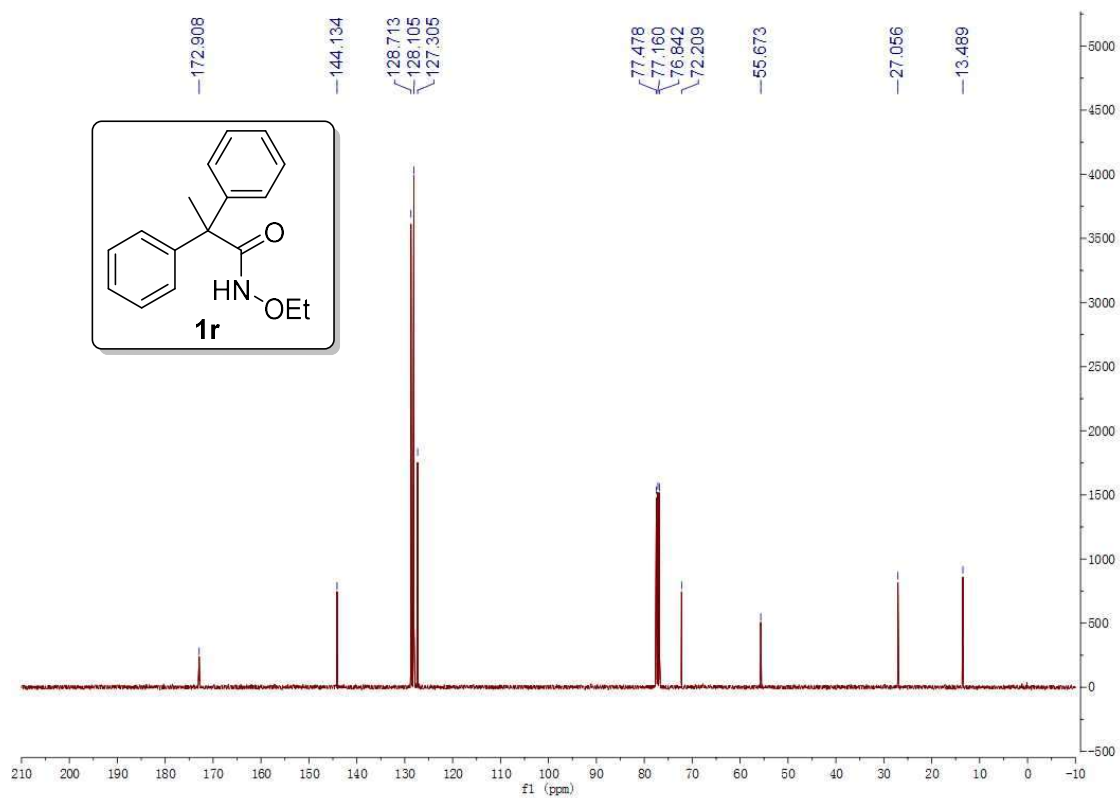

**<sup>13</sup>C NMR Spectrum of **1r** (CDCl<sub>3</sub>, 100 MHz)**

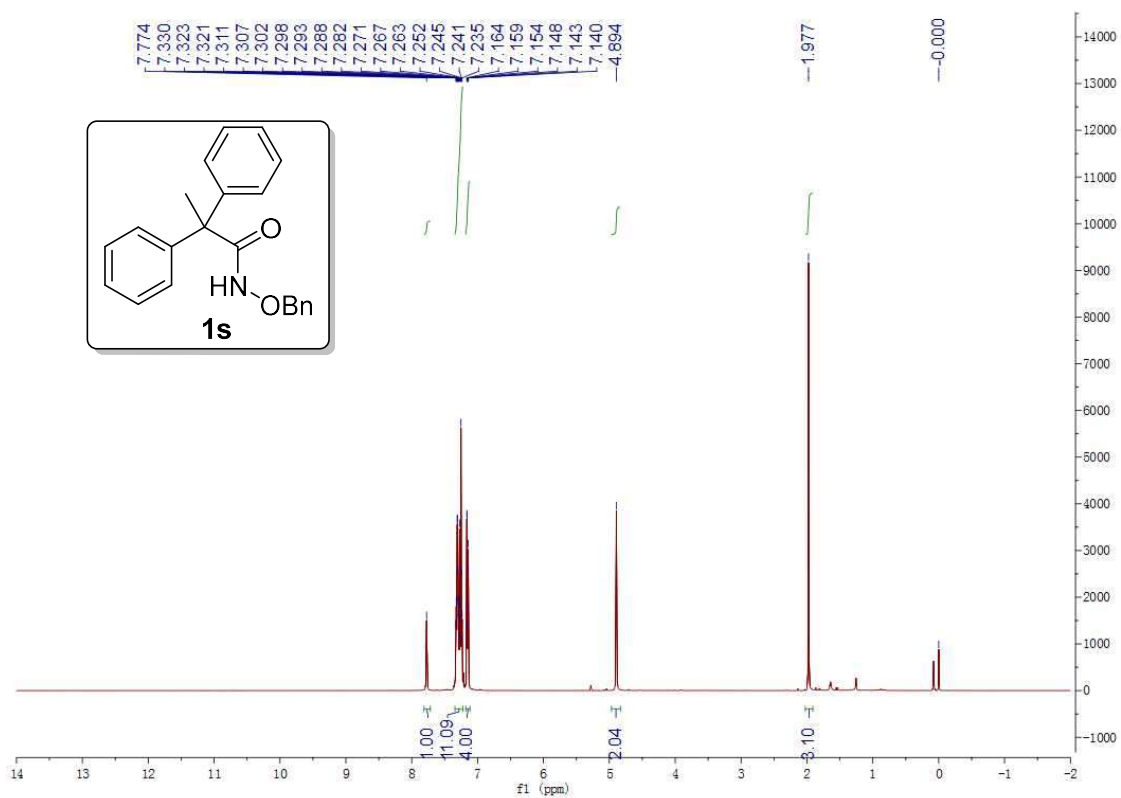

**<sup>1</sup>H NMR Spectrum of **1s** (CDCl<sub>3</sub>, 400 MHz)**

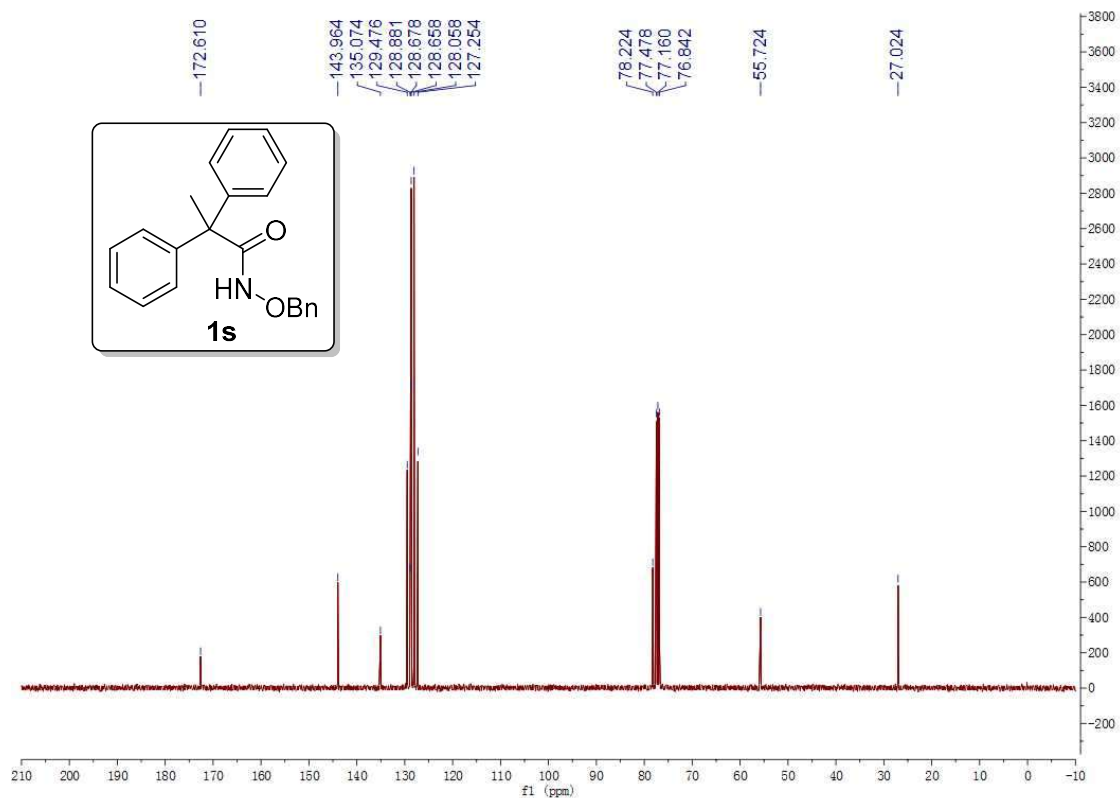

**<sup>13</sup>C NMR Spectrum of **1s** (CDCl<sub>3</sub>, 100 MHz)**

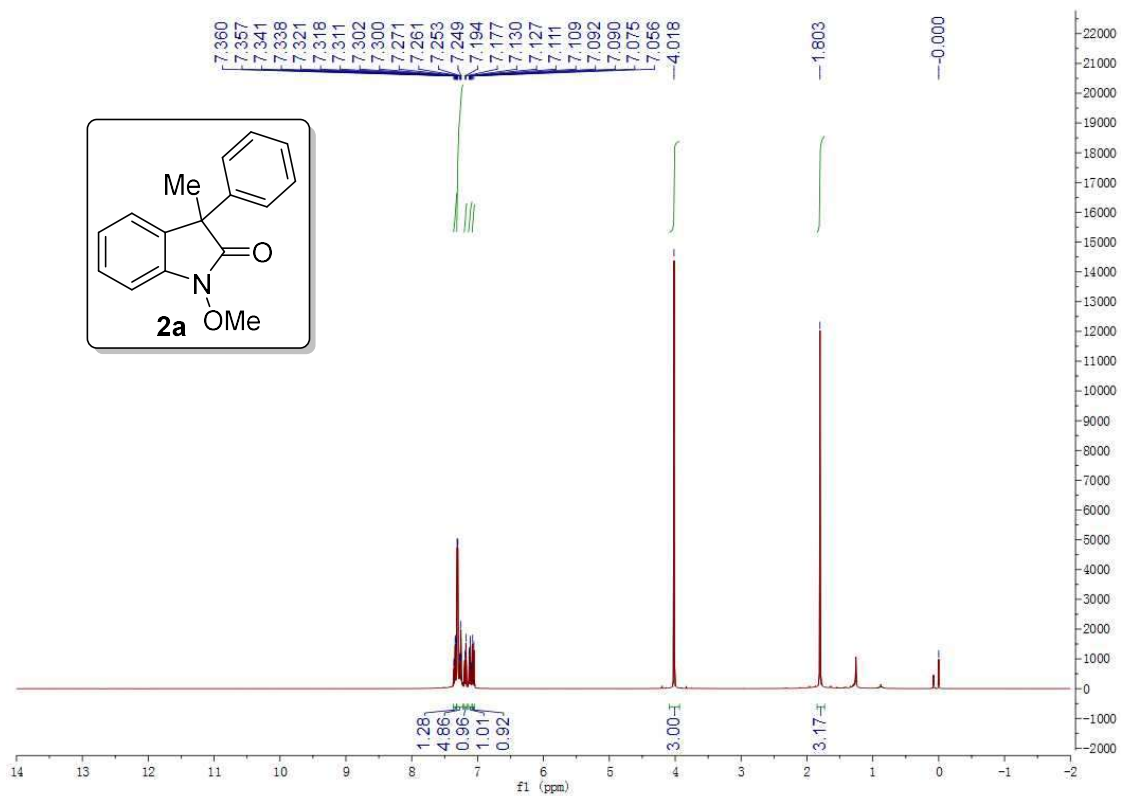

**<sup>1</sup>H NMR Spectrum of **2a** (CDCl<sub>3</sub>, 400 MHz)**

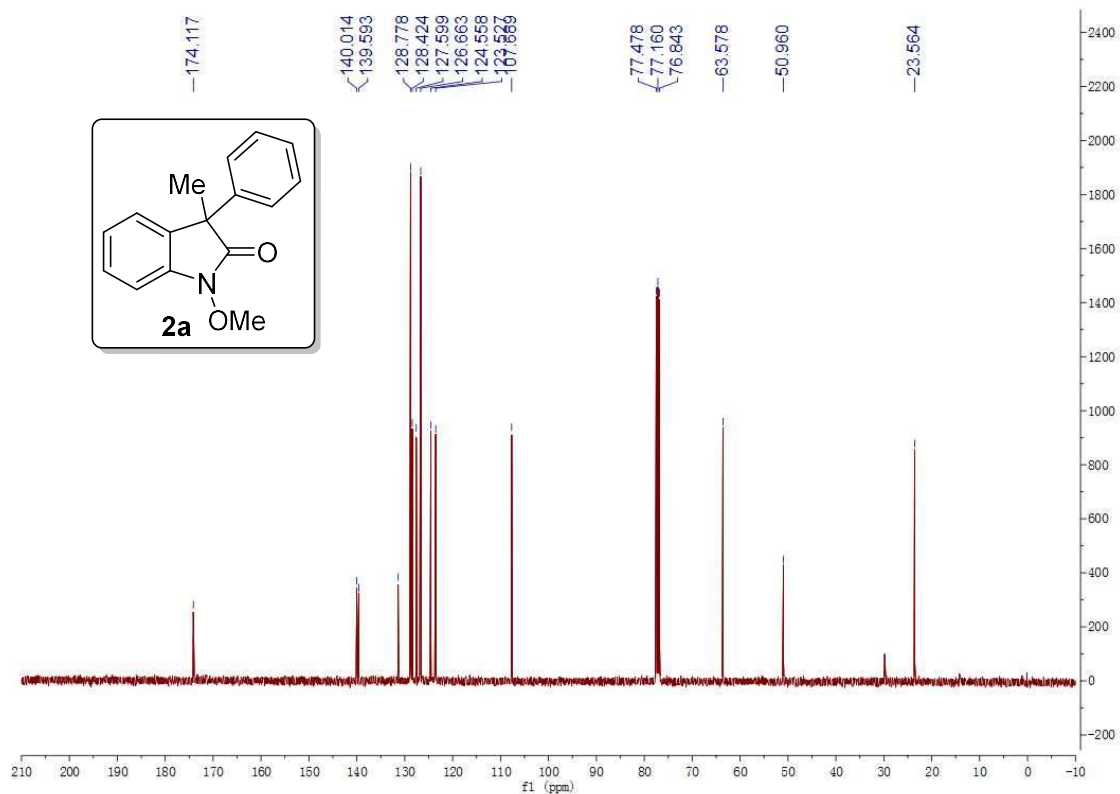

**<sup>13</sup>C NMR Spectrum of **2a** (CDCl<sub>3</sub>, 100 MHz)**

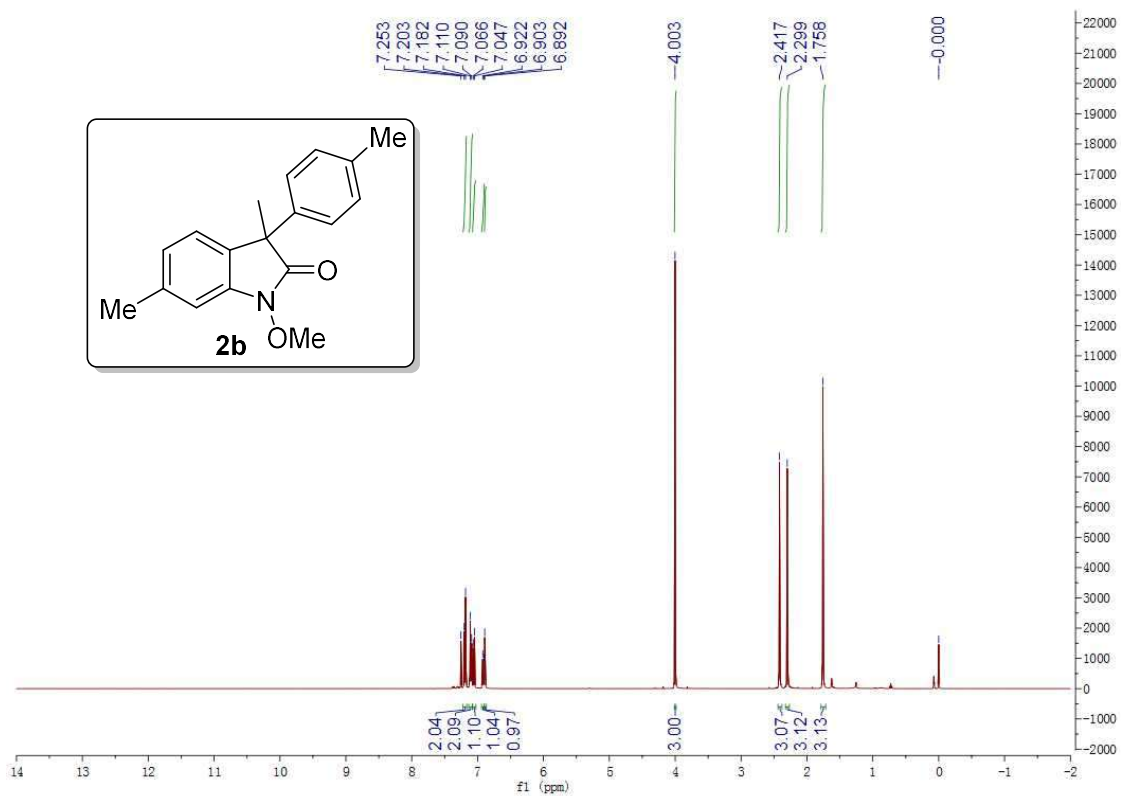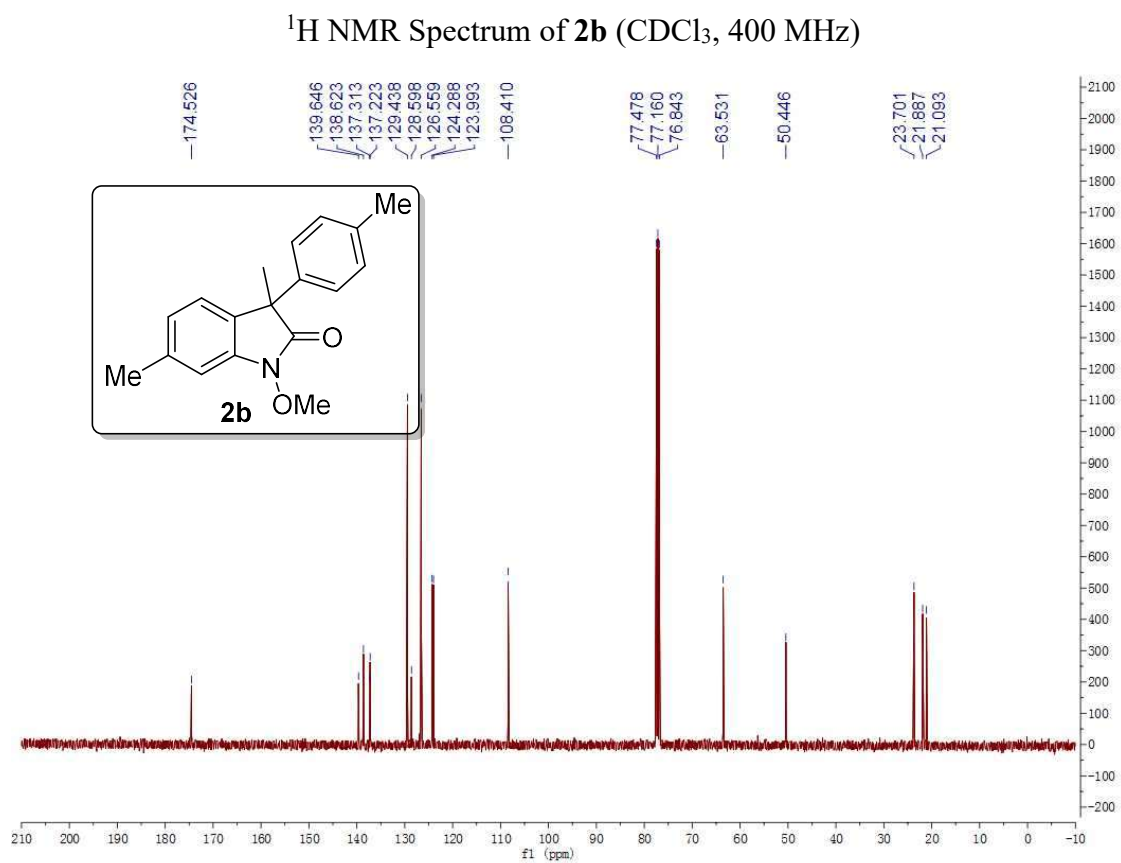

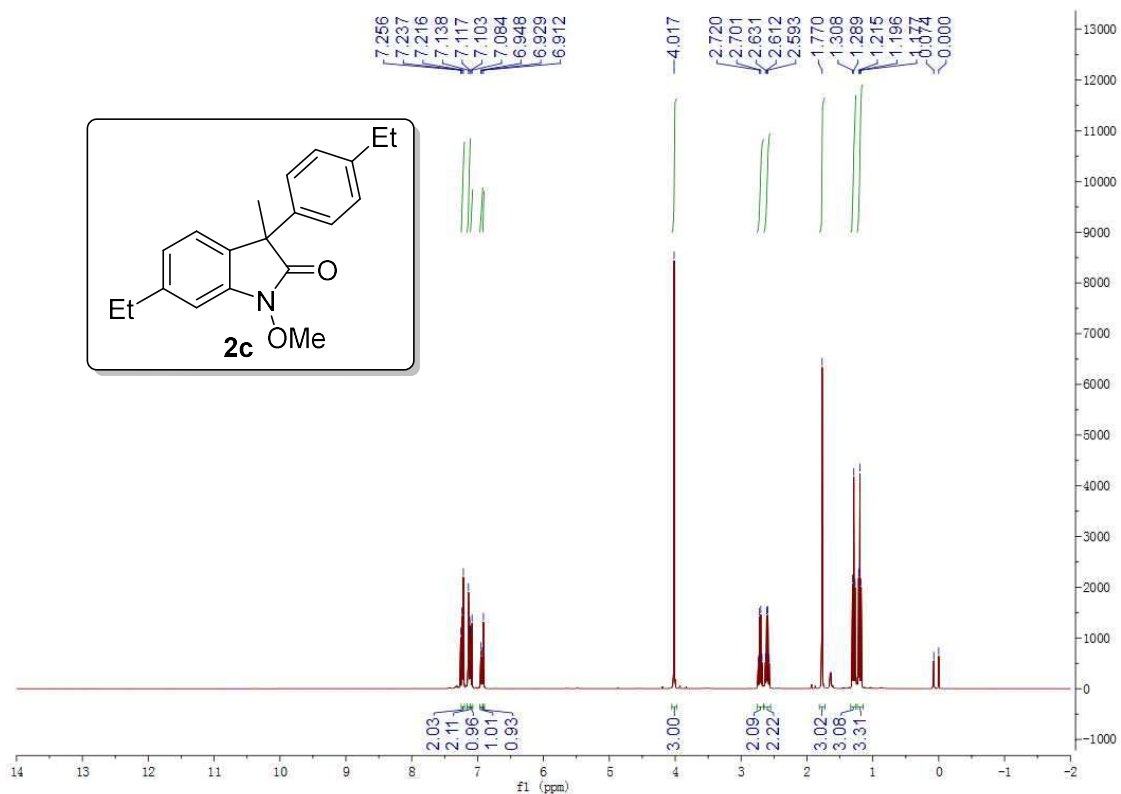

**<sup>1</sup>H NMR Spectrum of 2c (CDCl<sub>3</sub>, 400 MHz)**

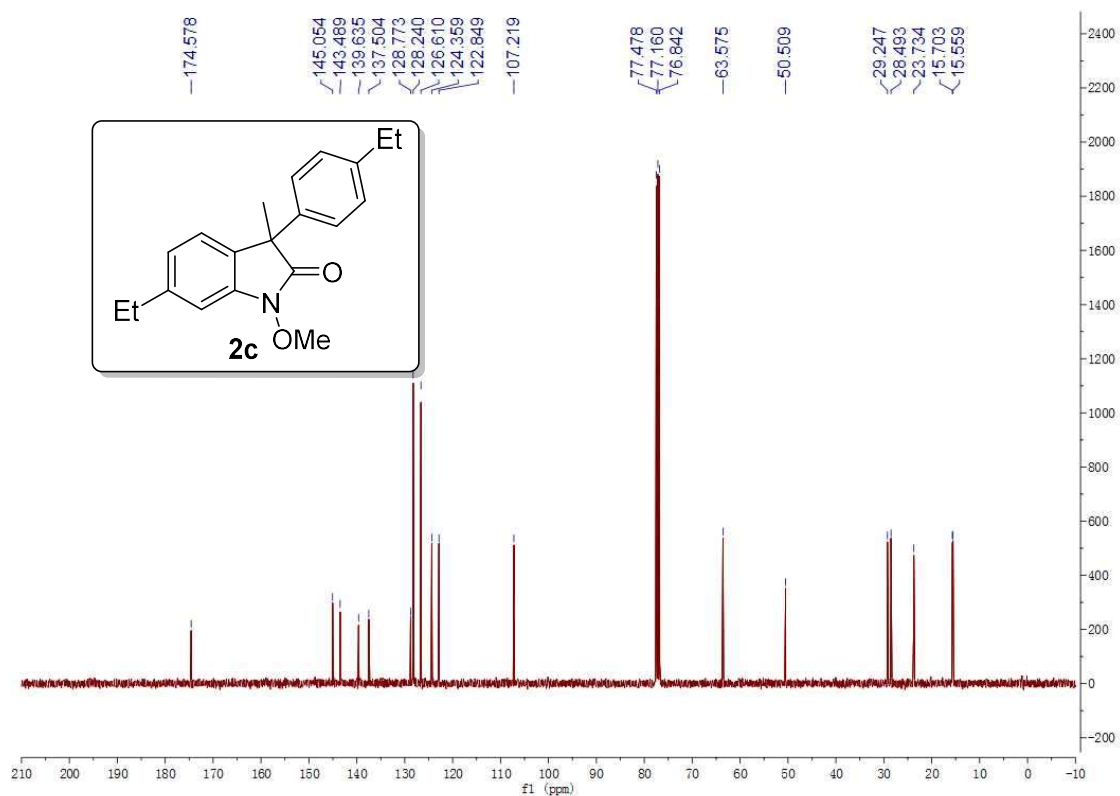

**<sup>13</sup>C NMR Spectrum of 2c (CDCl<sub>3</sub>, 100 MHz)**



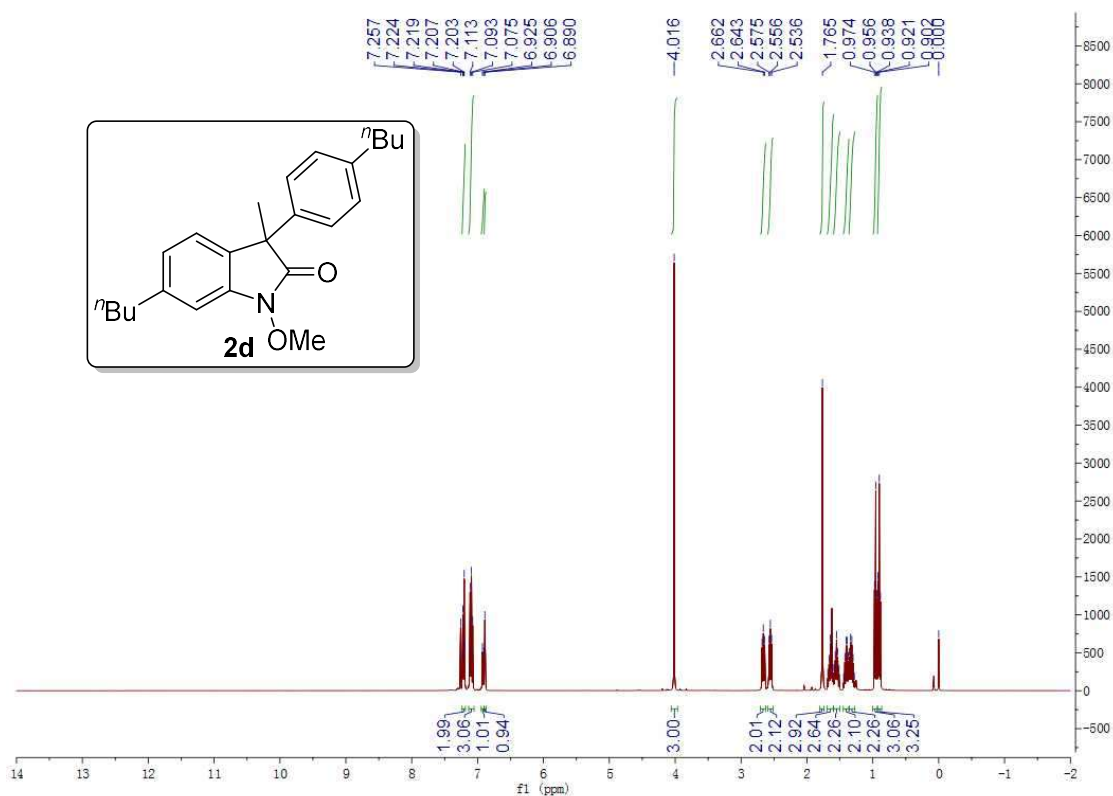

<sup>1</sup>H NMR Spectrum of **2d** (CDCl<sub>3</sub>, 400 MHz)

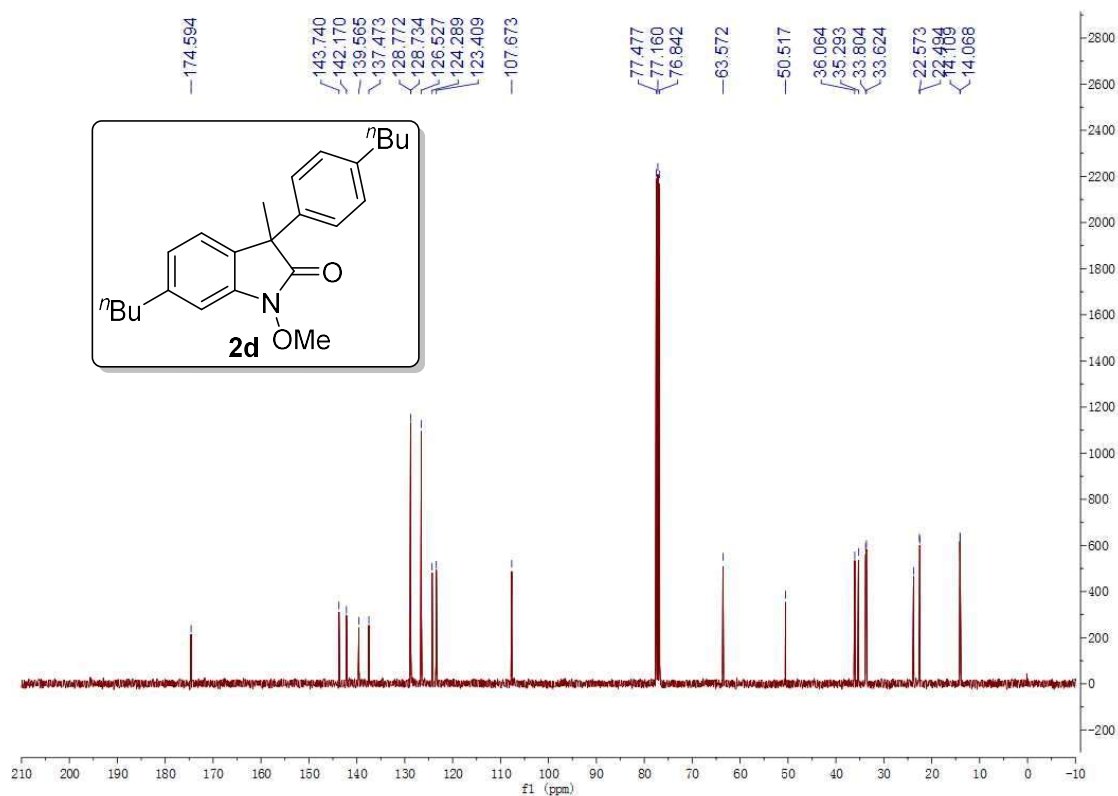

<sup>13</sup>C NMR Spectrum of **2d** (CDCl<sub>3</sub>, 100 MHz)

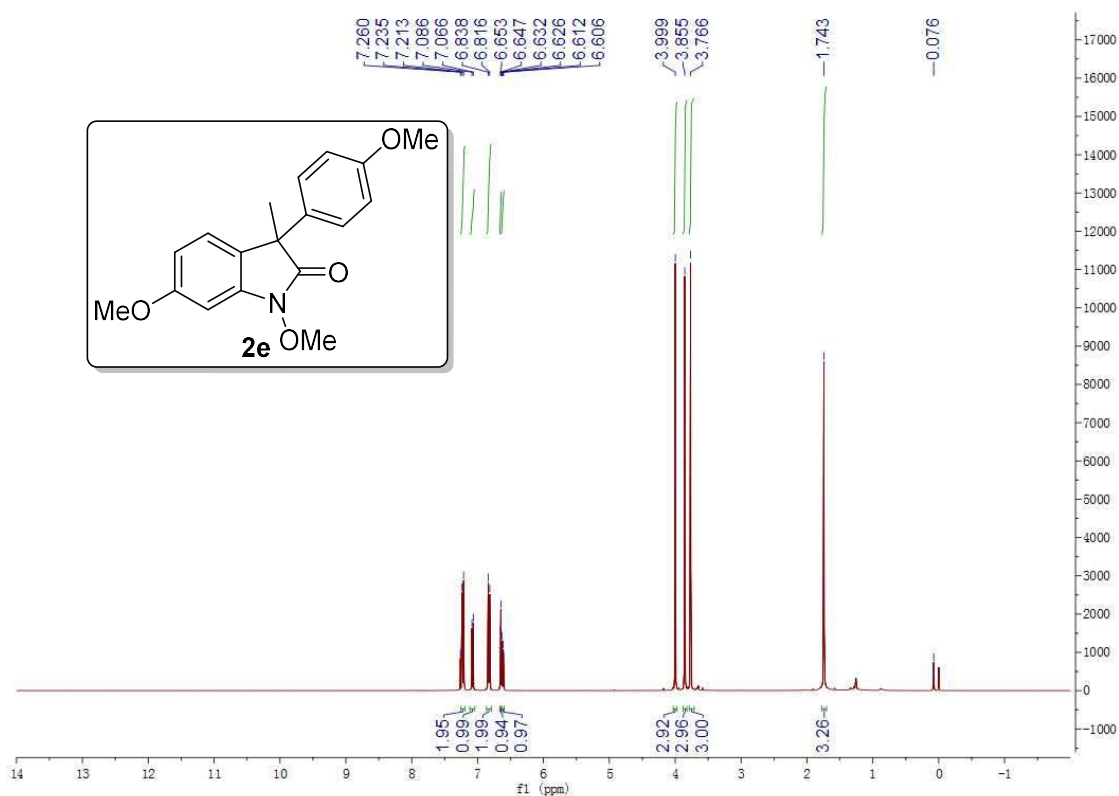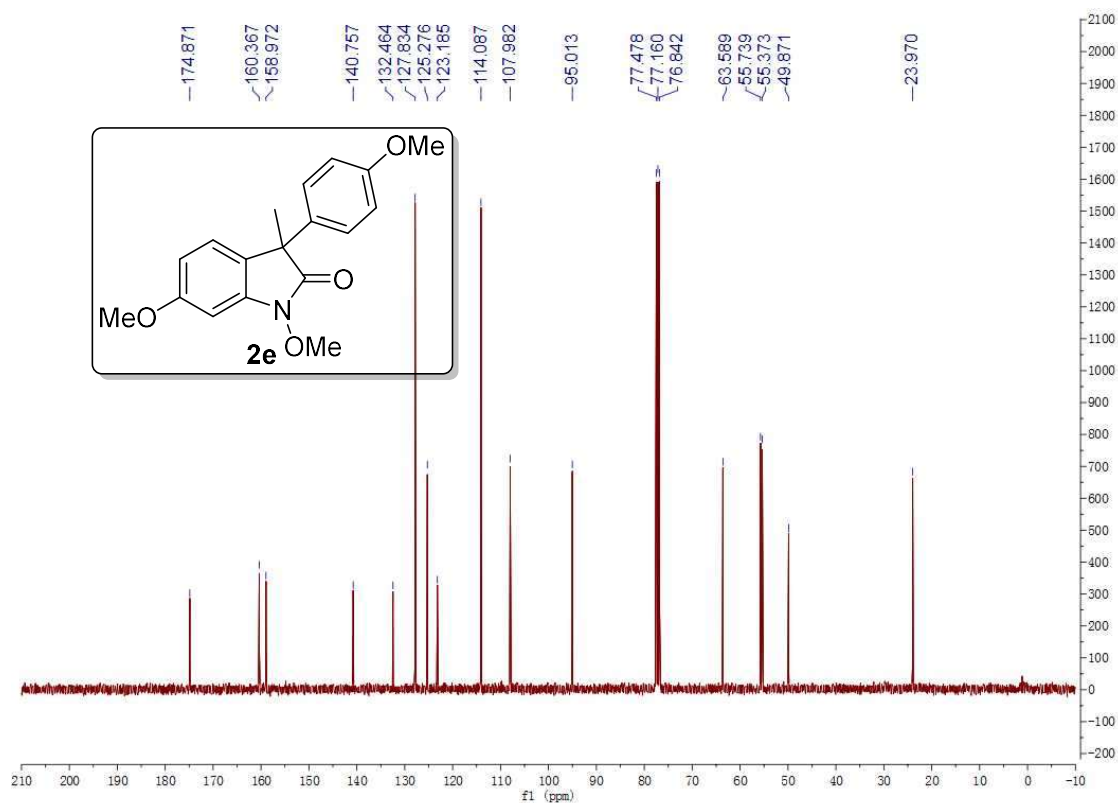

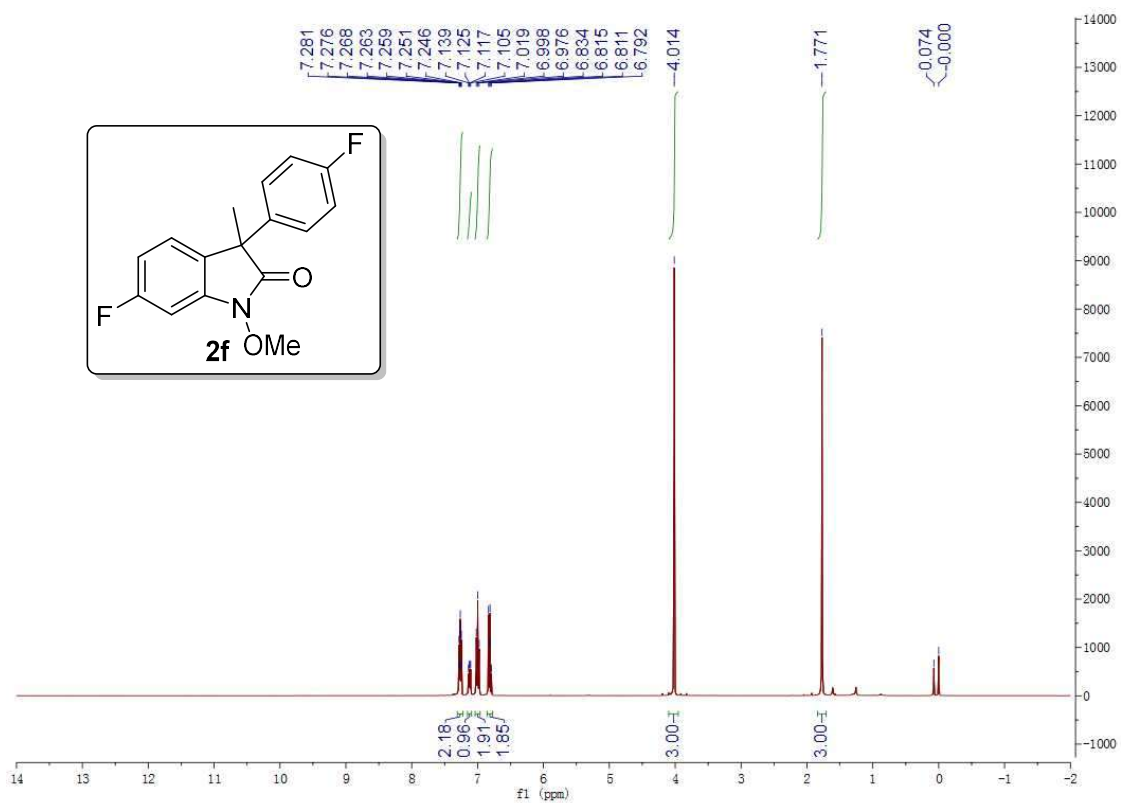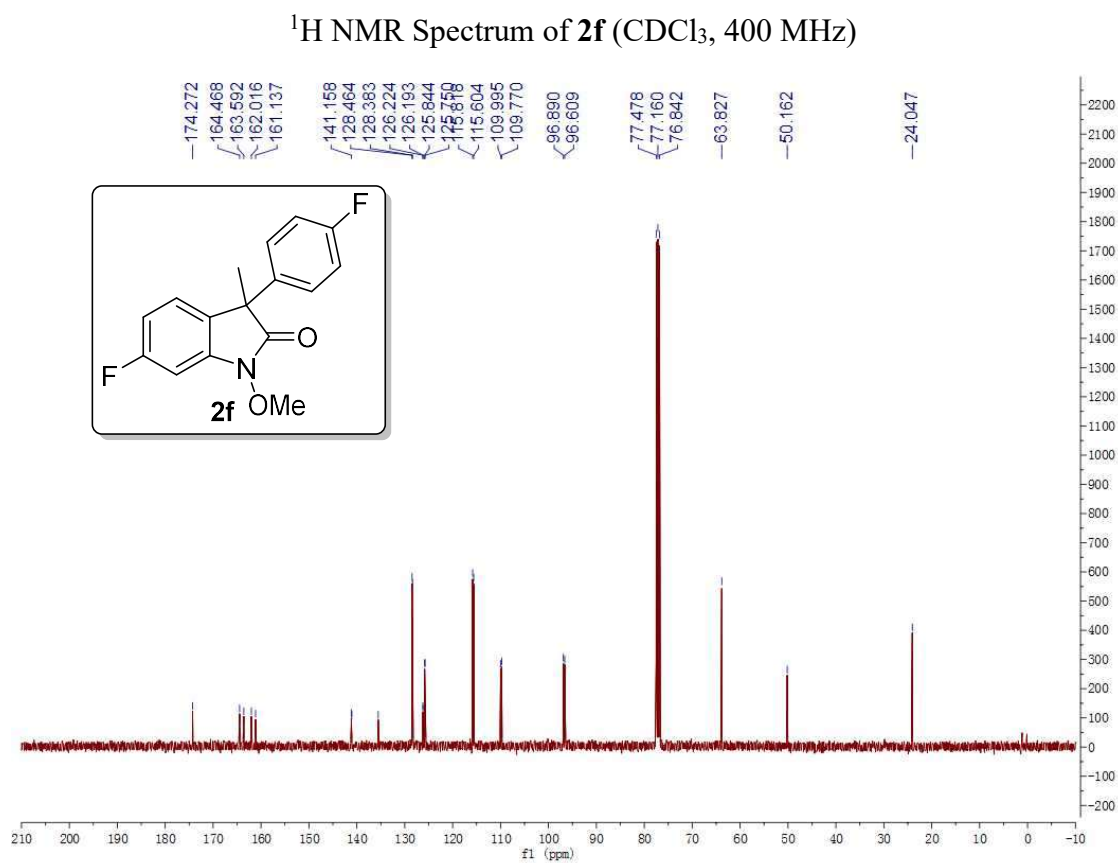

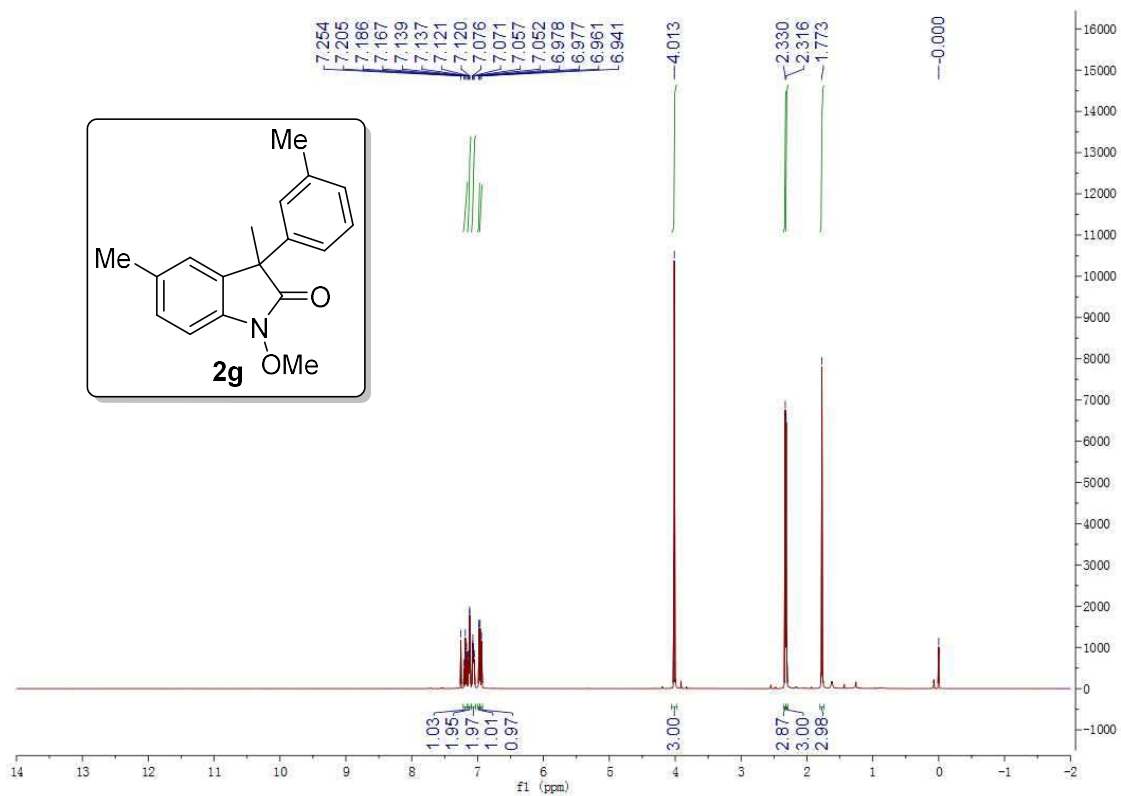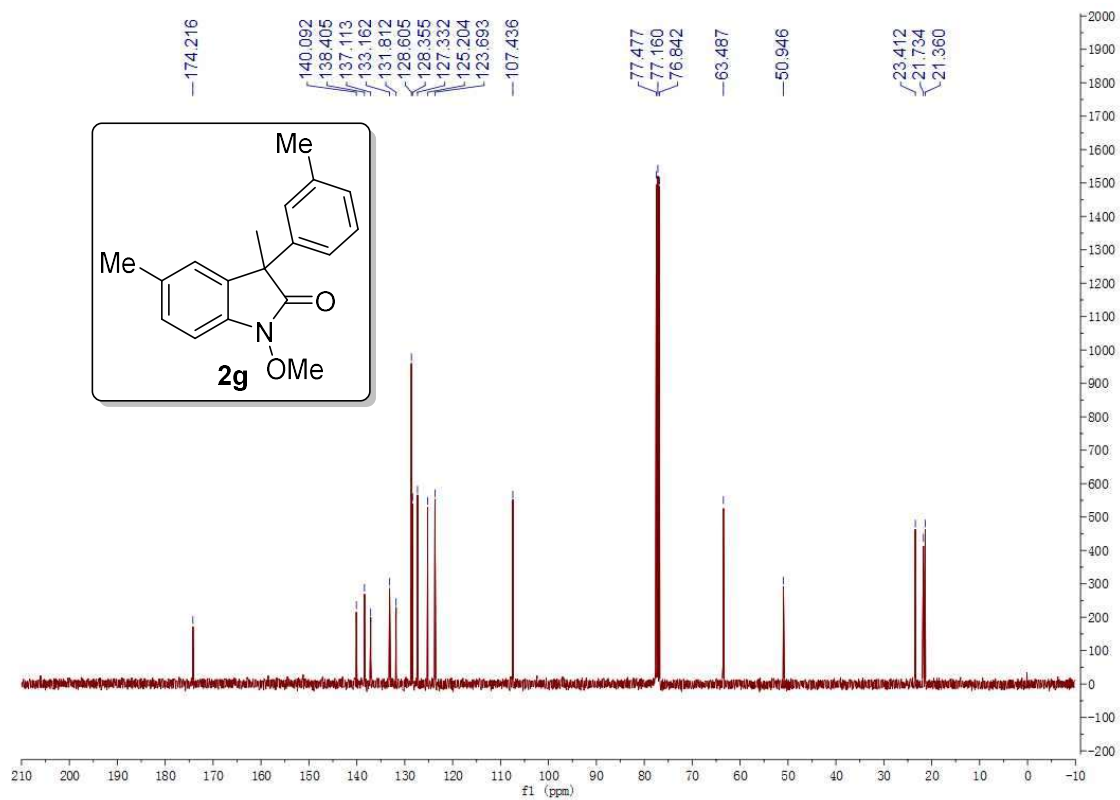

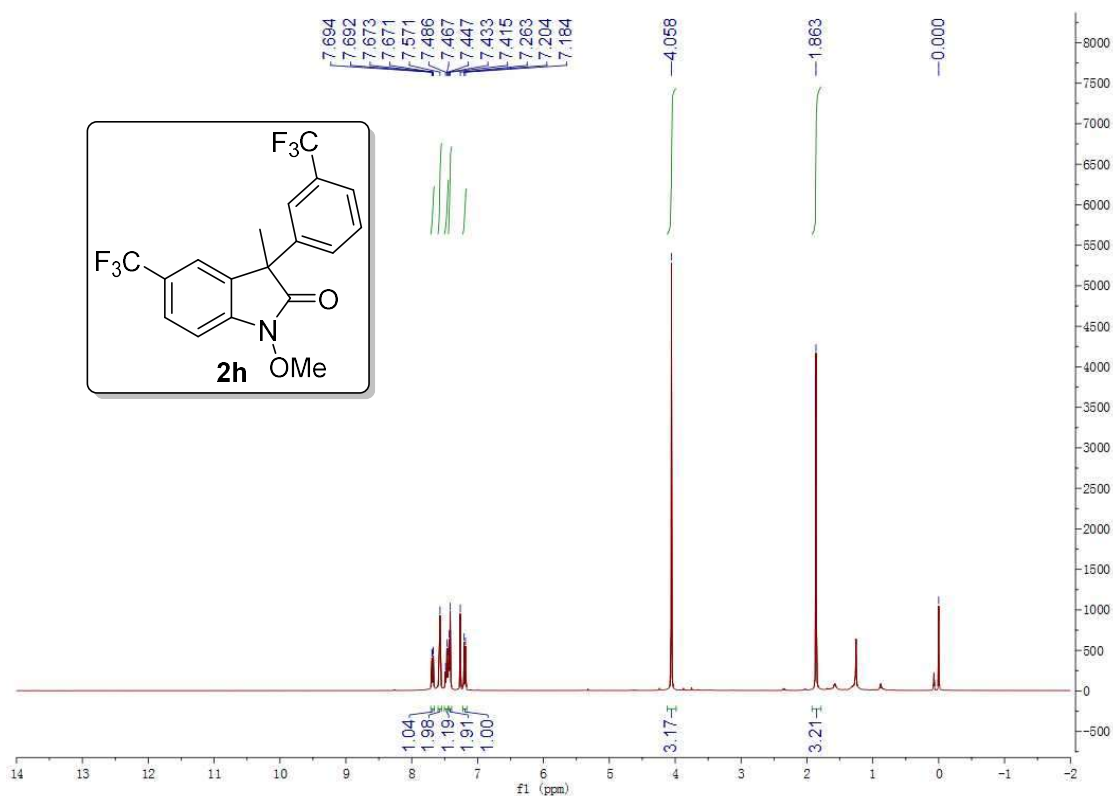

<sup>1</sup>H NMR Spectrum of **2h** (CDCl<sub>3</sub>, 400 MHz)

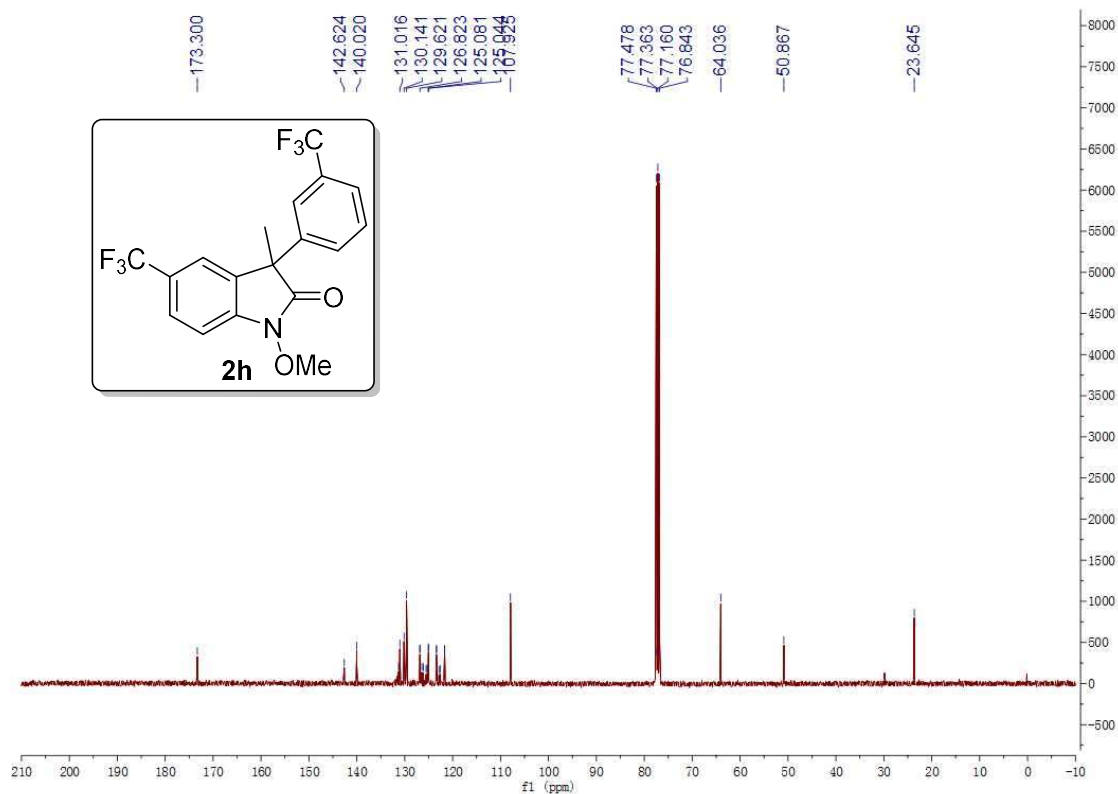

<sup>13</sup>C NMR Spectrum of **2h** (CDCl<sub>3</sub>, 100 MHz)

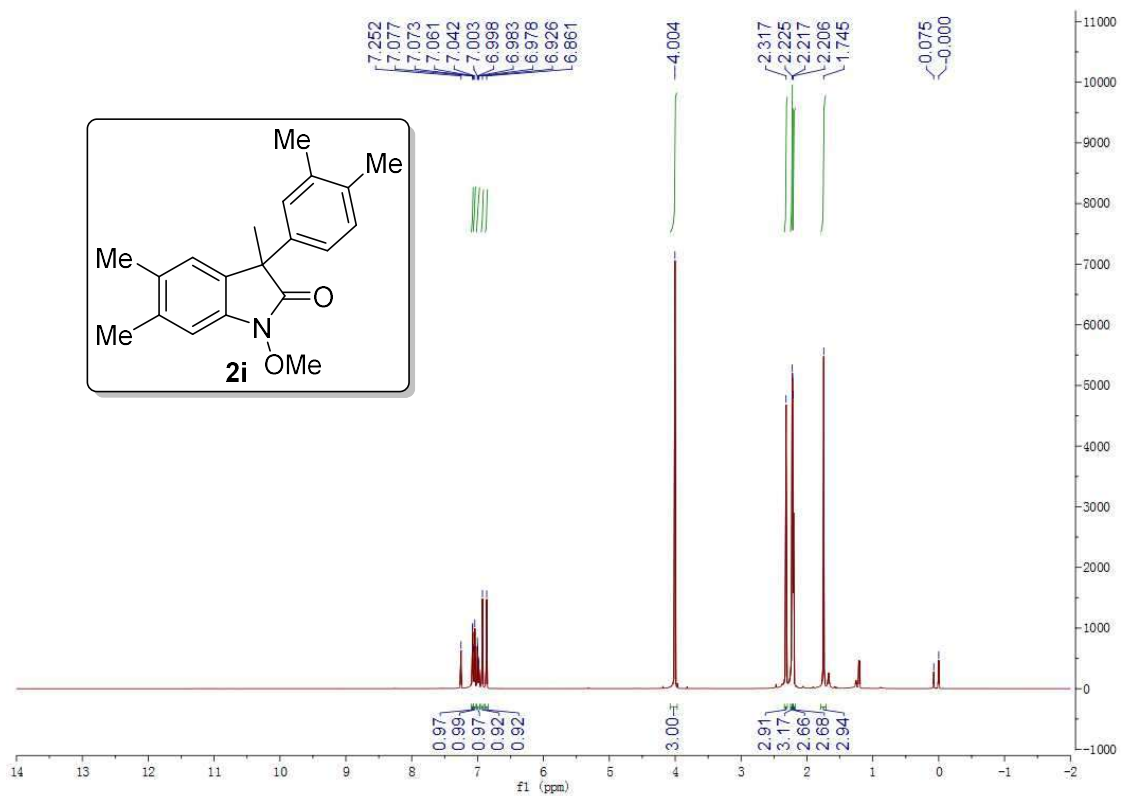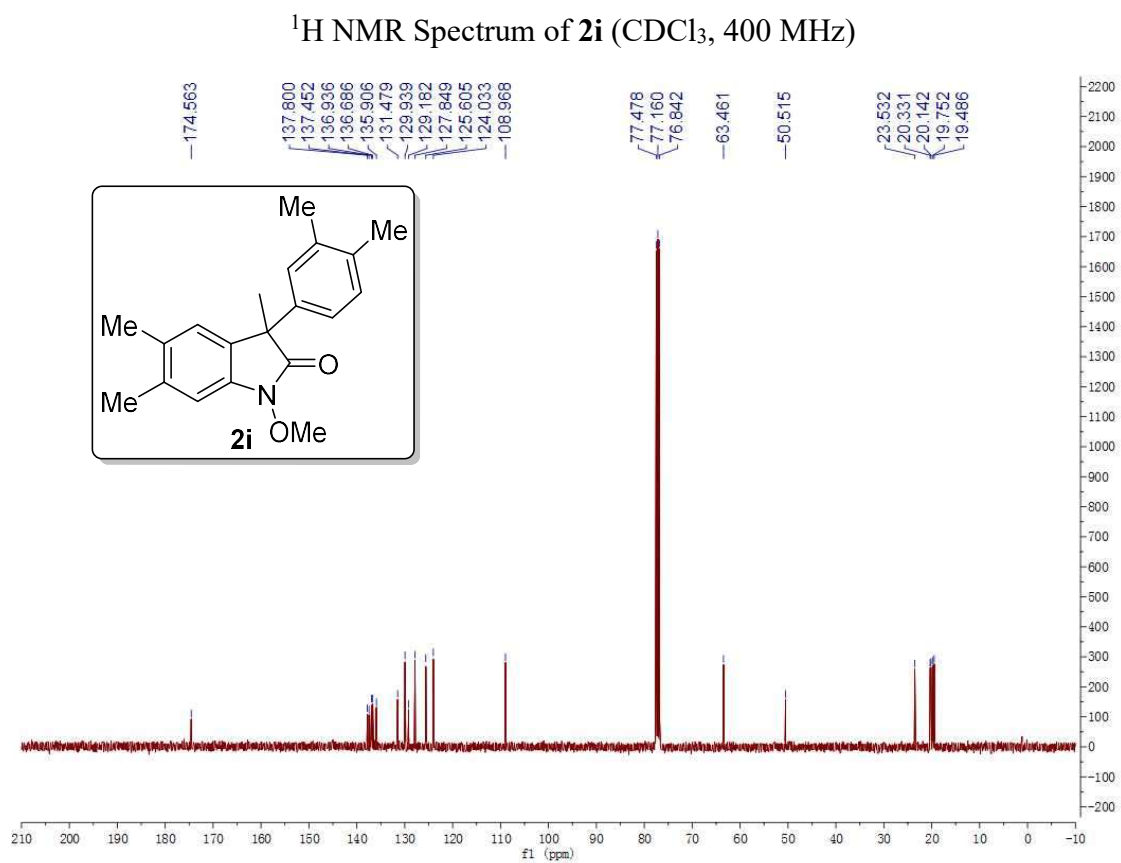

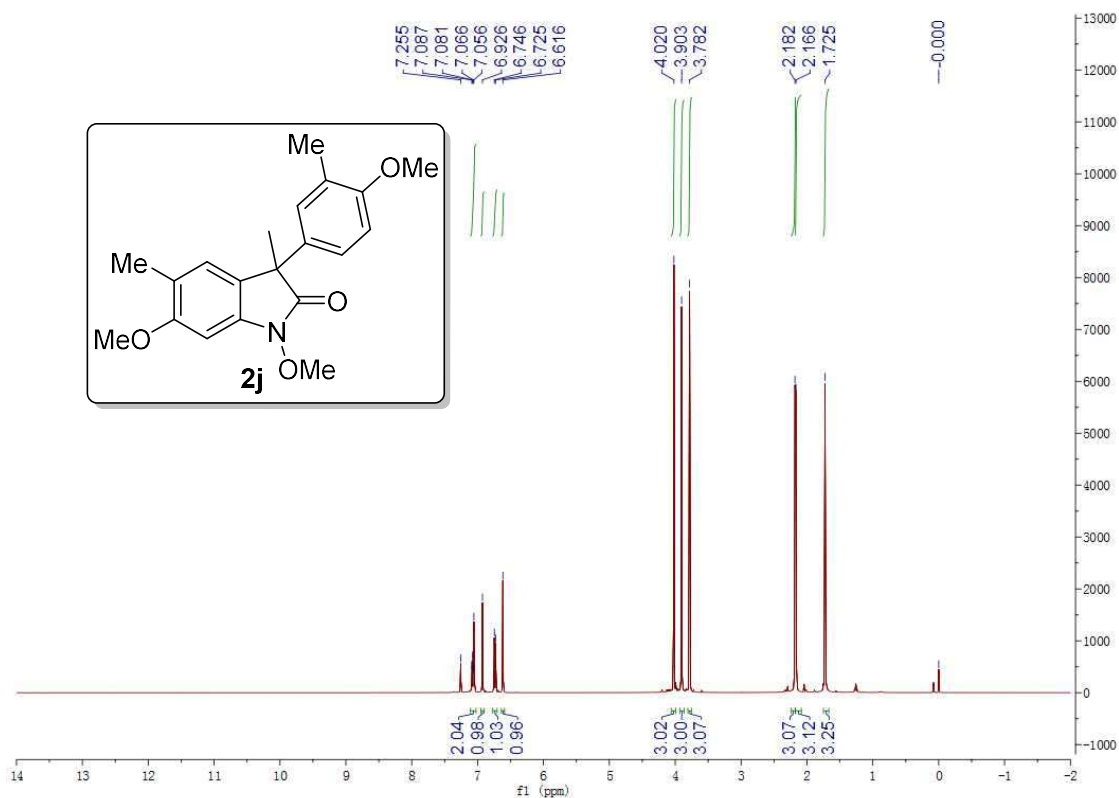

**<sup>1</sup>H NMR Spectrum of **2j** (CDCl<sub>3</sub>, 400 MHz)**

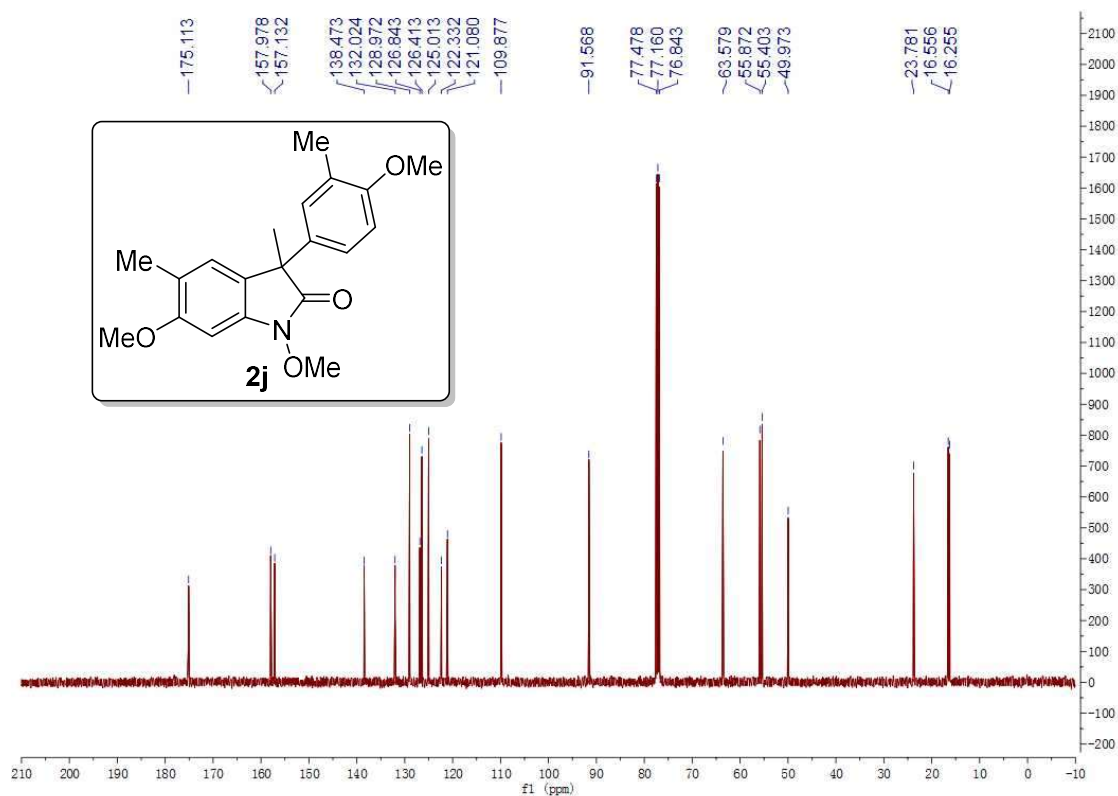

**<sup>13</sup>C NMR Spectrum of **2j** (CDCl<sub>3</sub>, 100 MHz)**

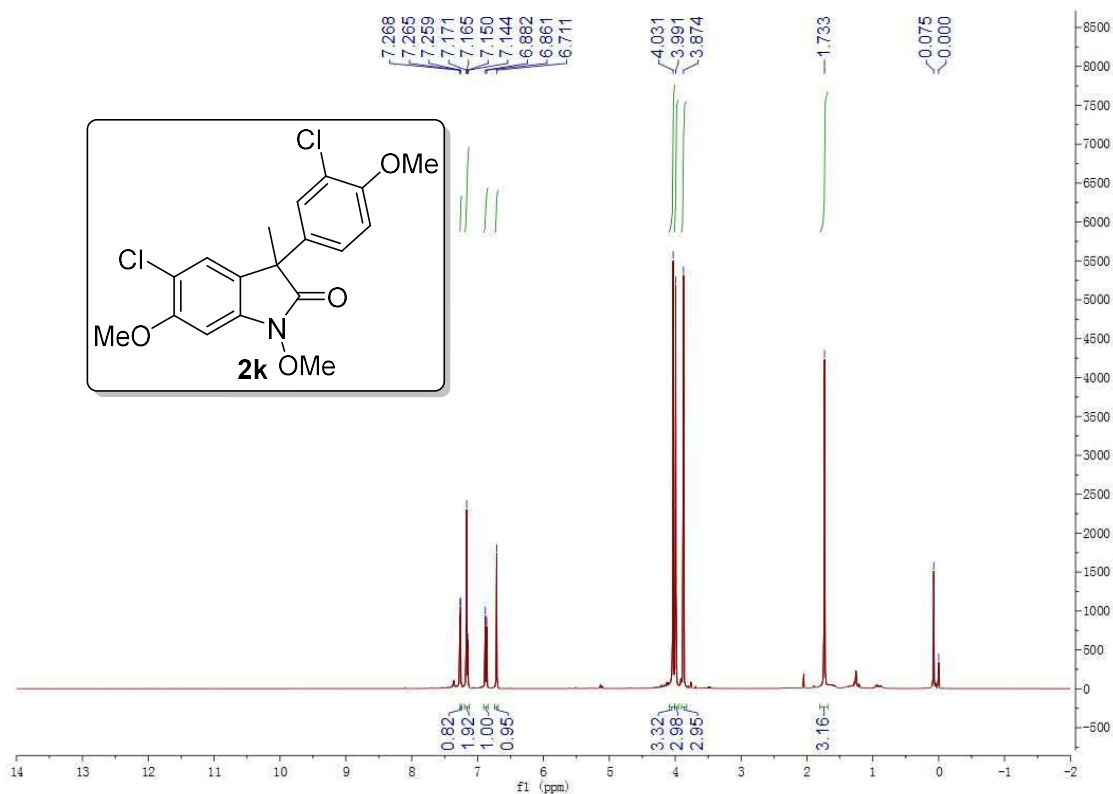

<sup>1</sup>H NMR Spectrum of **2k** (CDCl<sub>3</sub>, 400 MHz)

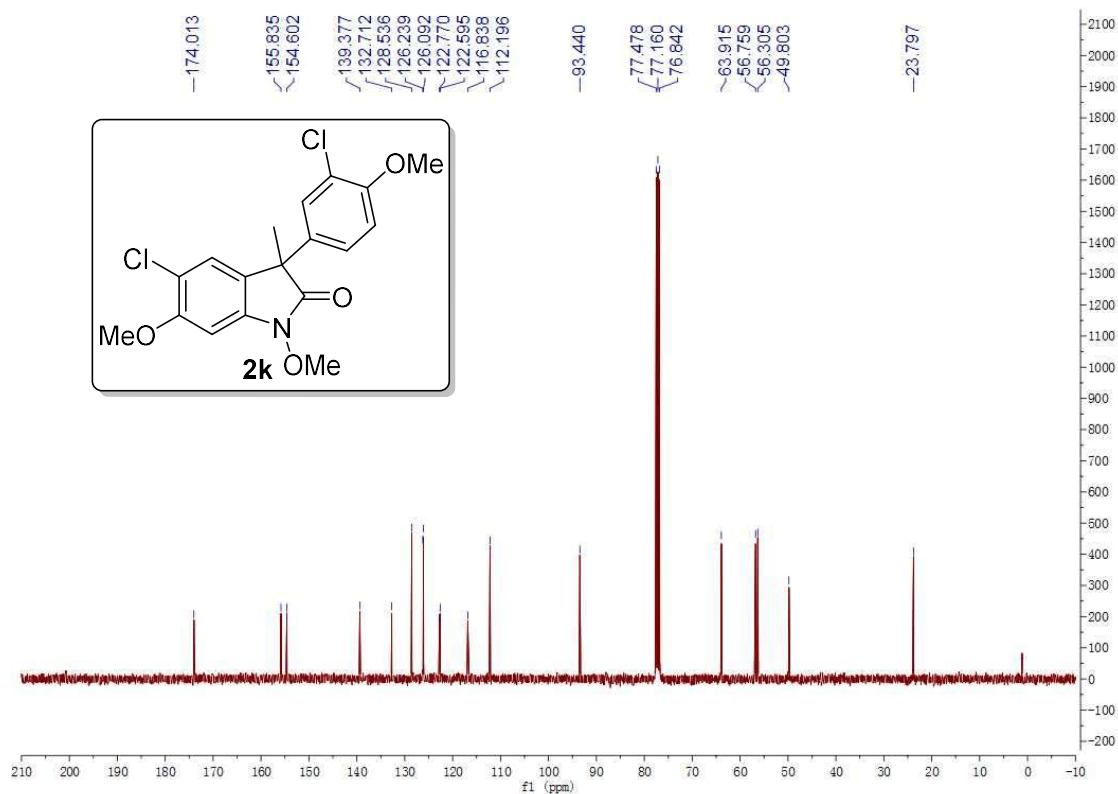

<sup>13</sup>C NMR Spectrum of **2k** (CDCl<sub>3</sub>, 100 MHz)



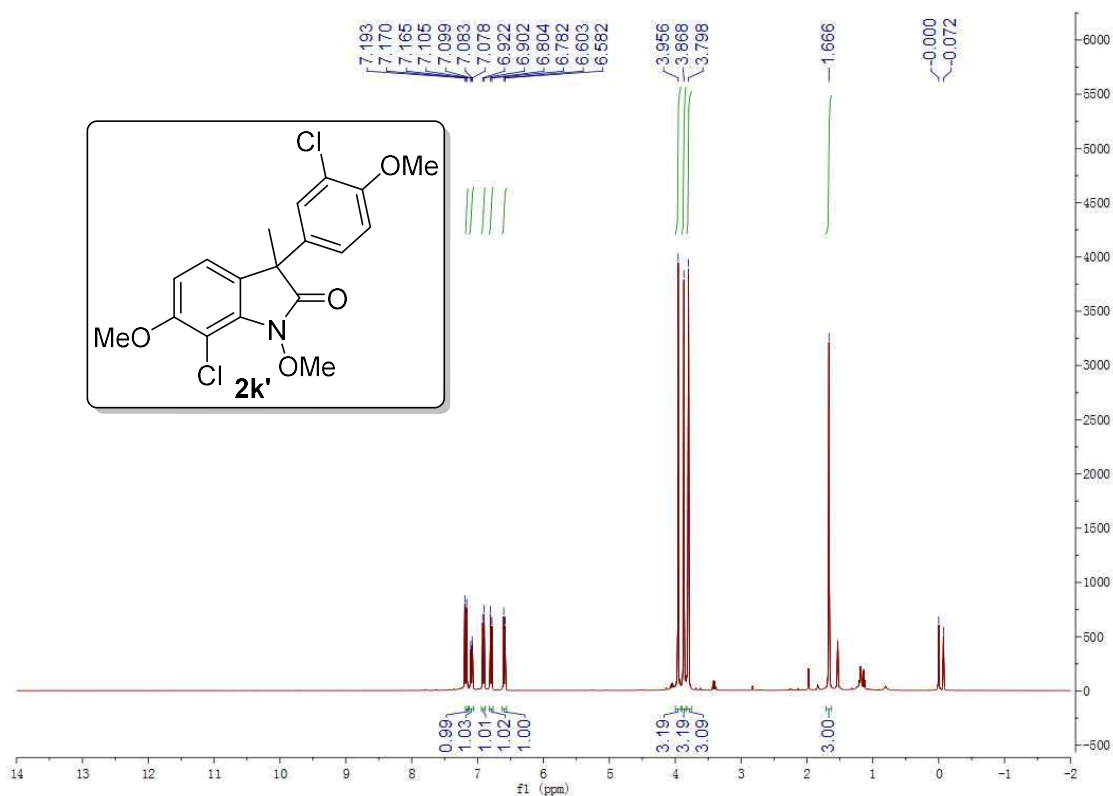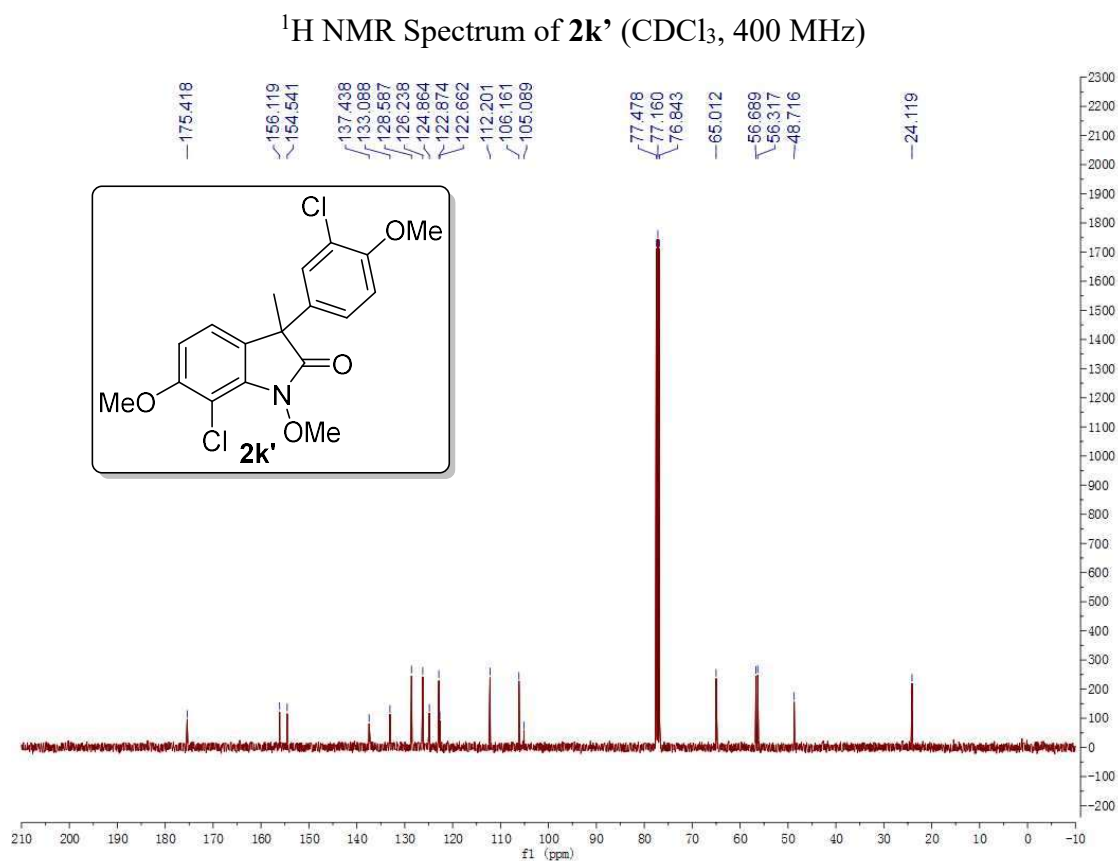

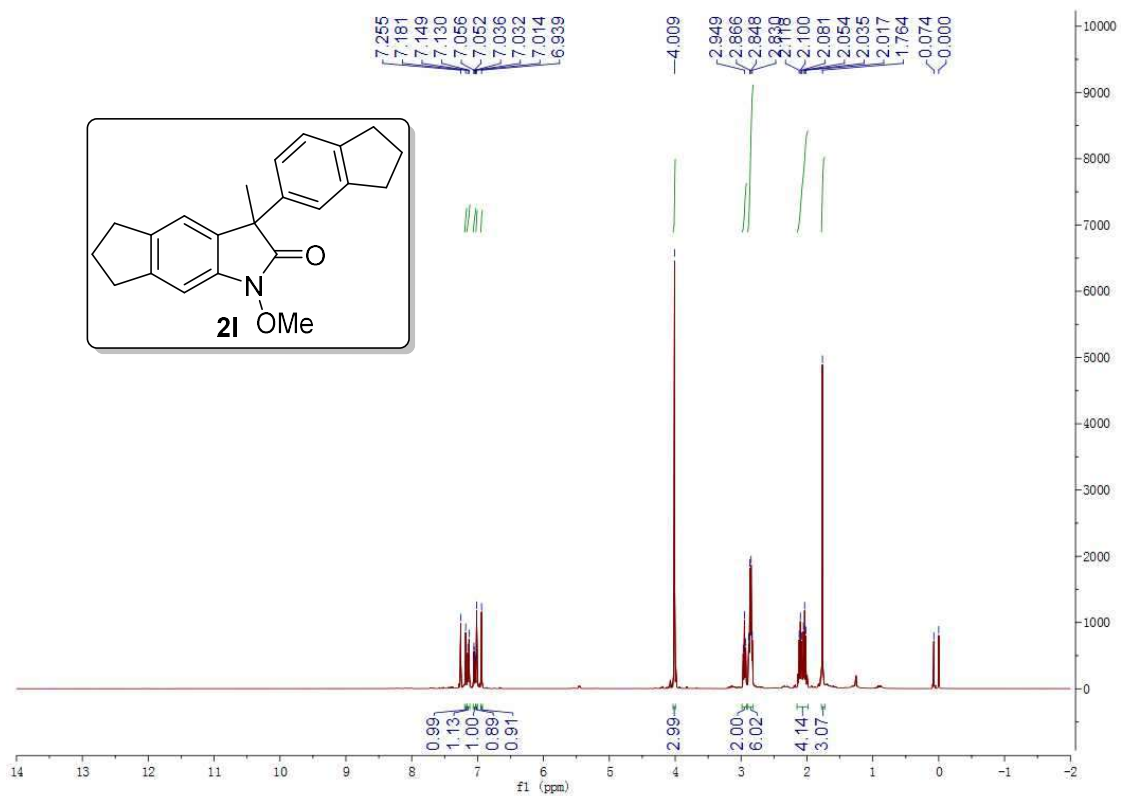

<sup>1</sup>H NMR Spectrum of **2I** (CDCl<sub>3</sub>, 400 MHz)

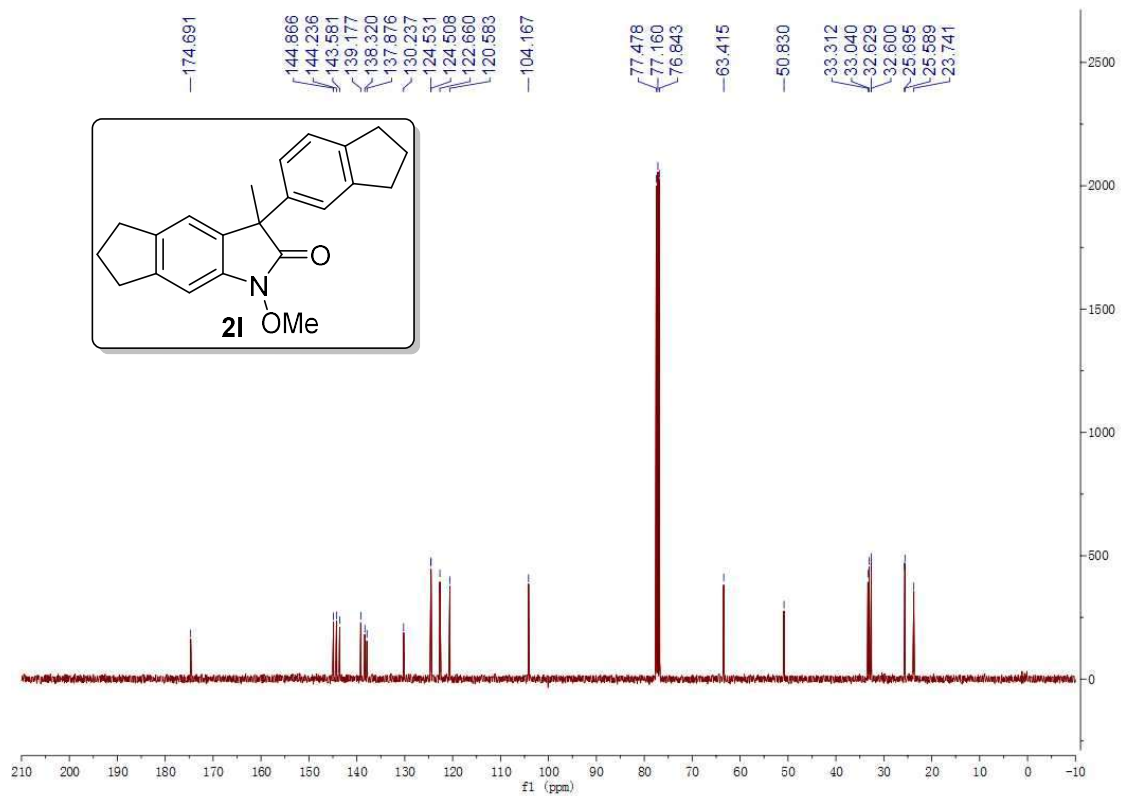

<sup>13</sup>C NMR Spectrum of **2I** (CDCl<sub>3</sub>, 100 MHz)

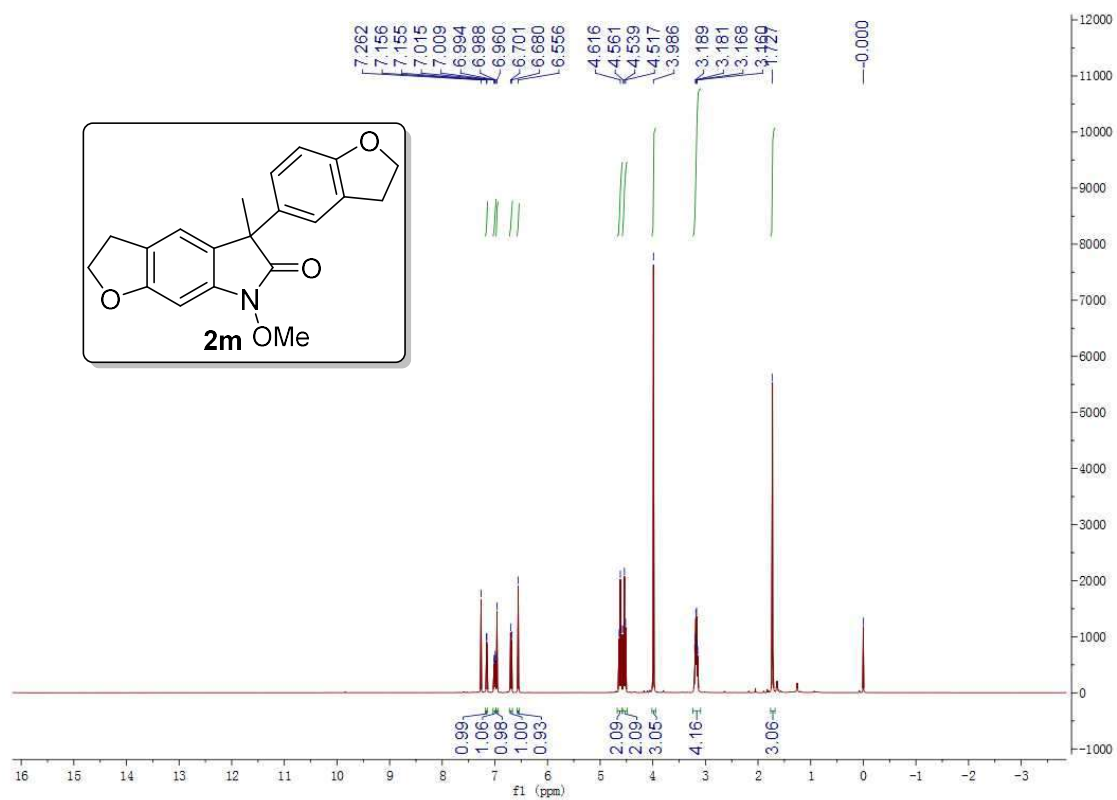

<sup>1</sup>H NMR Spectrum of **2m** (CDCl<sub>3</sub>, 400 MHz)

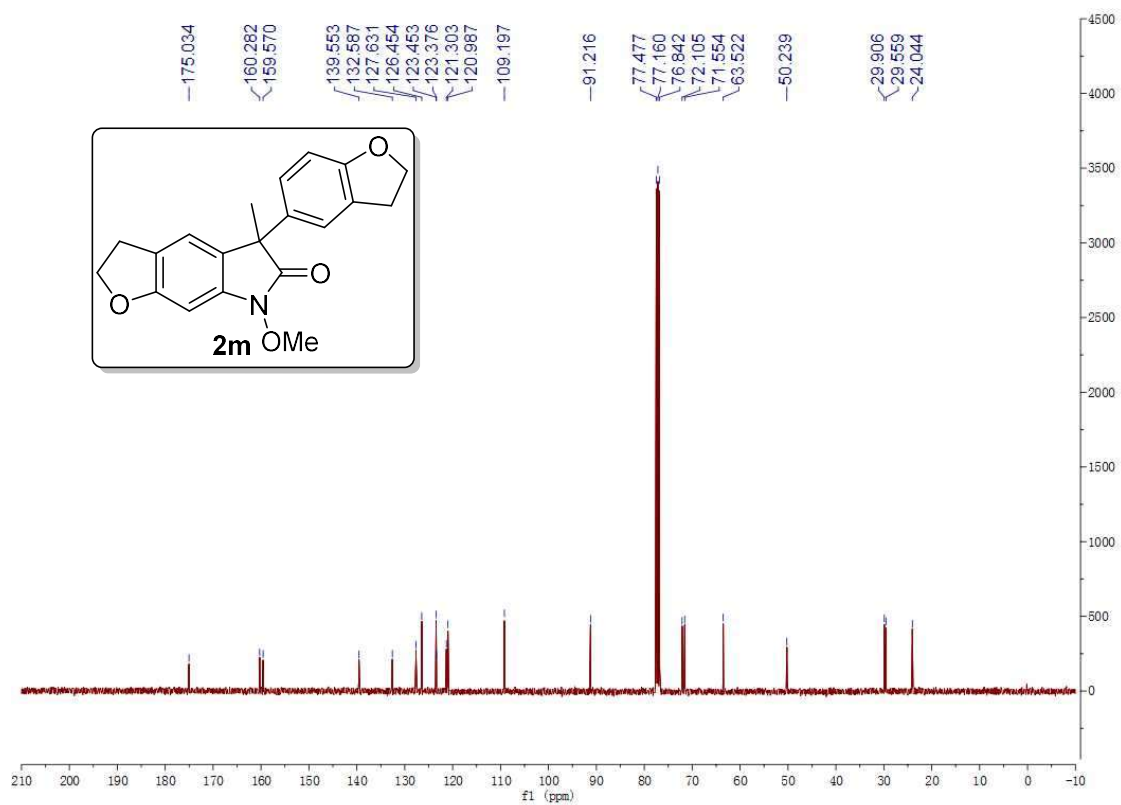

<sup>13</sup>C NMR Spectrum of **2m** (CDCl<sub>3</sub>, 100 MHz)

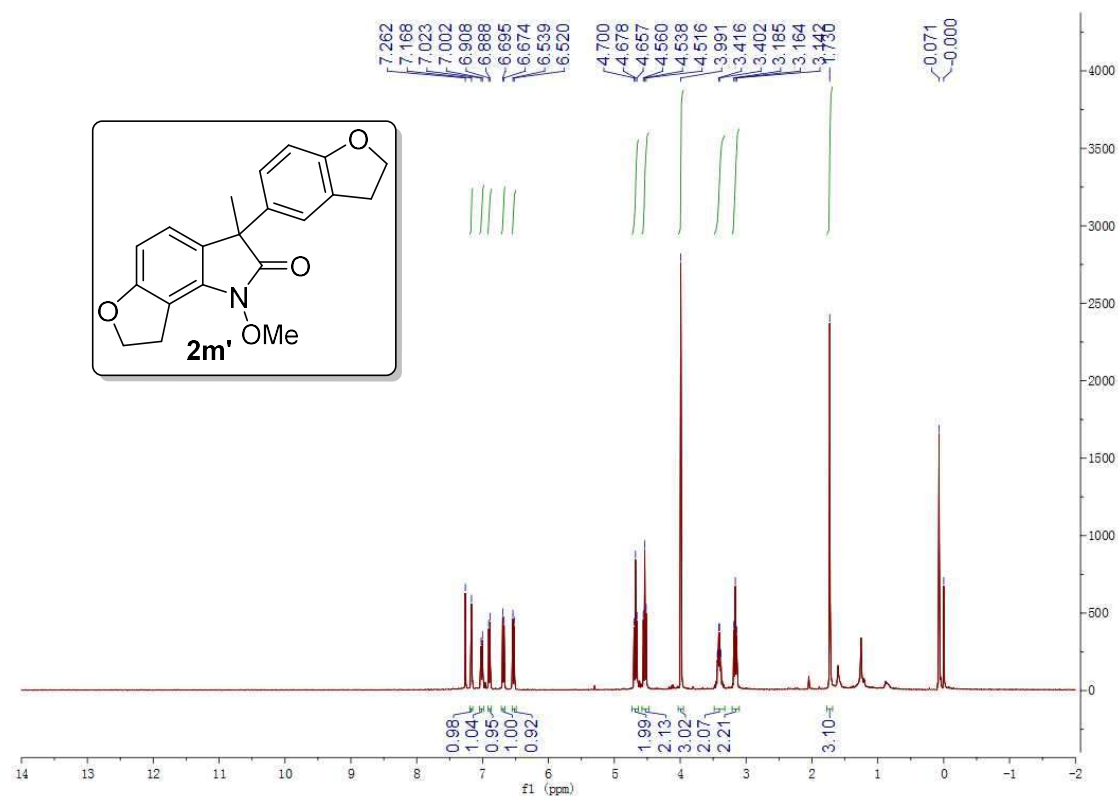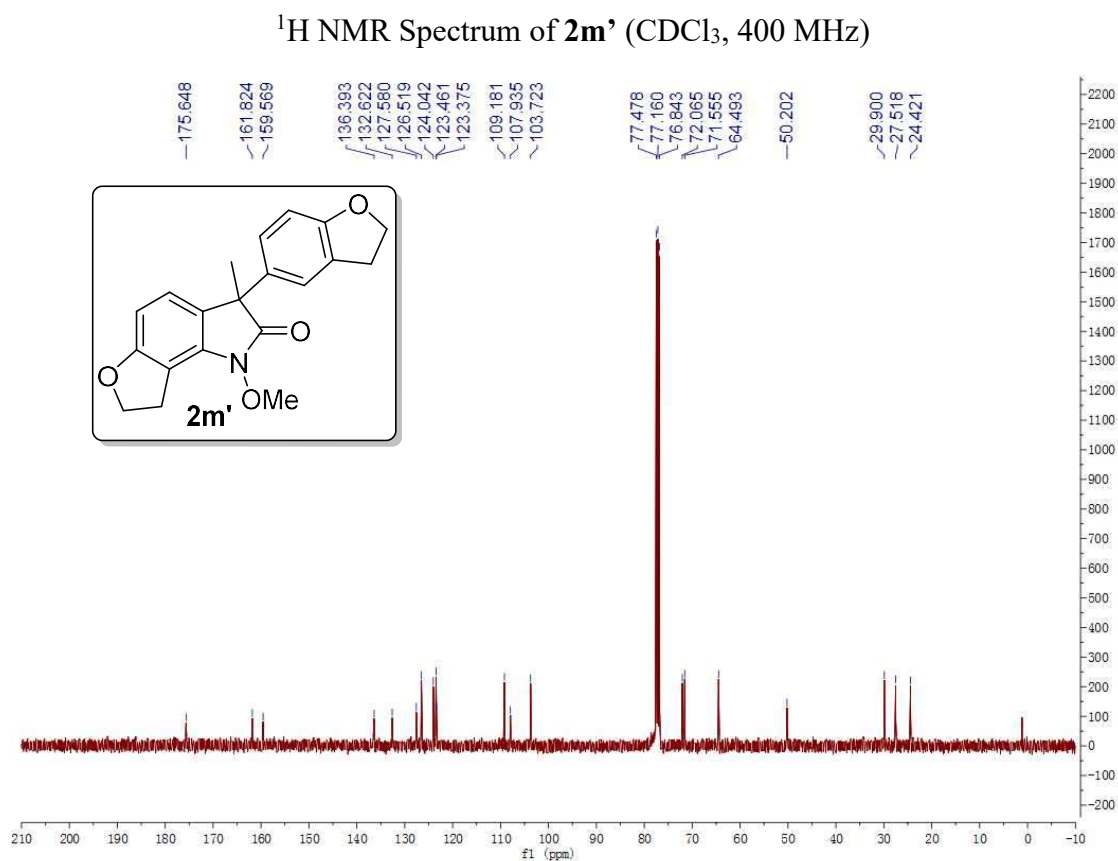

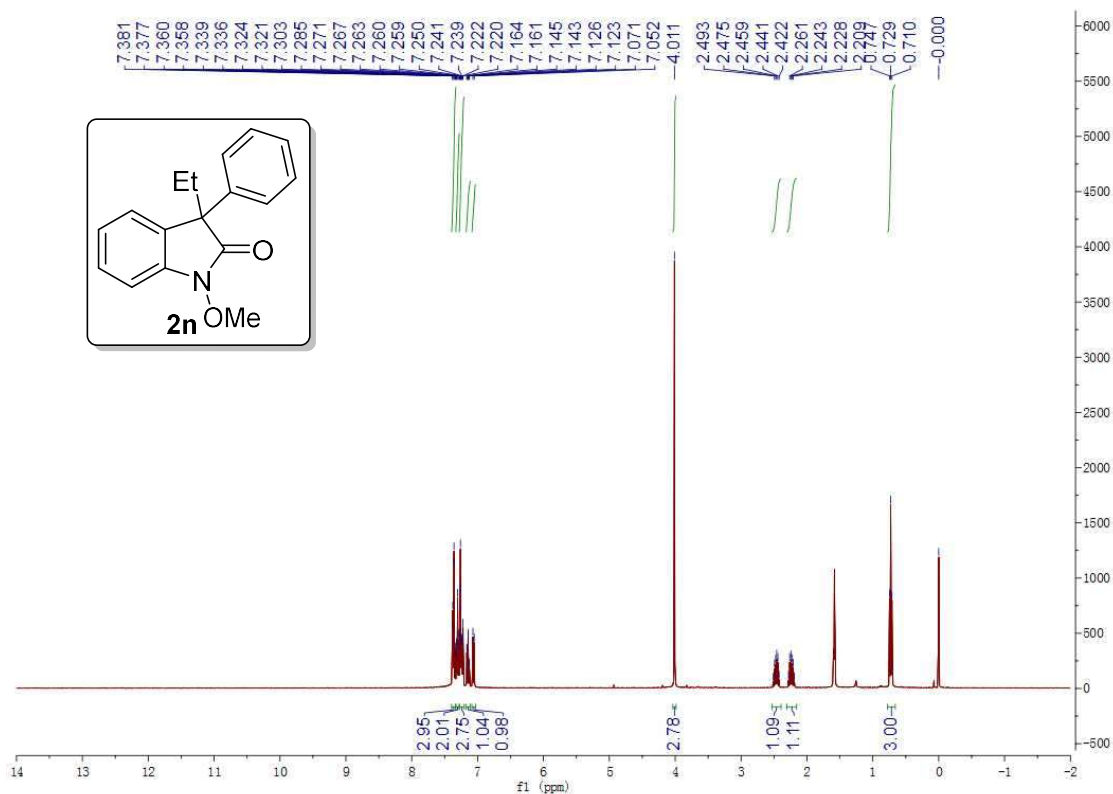

**<sup>1</sup>H NMR Spectrum of **2n** (CDCl<sub>3</sub>, 400 MHz)**

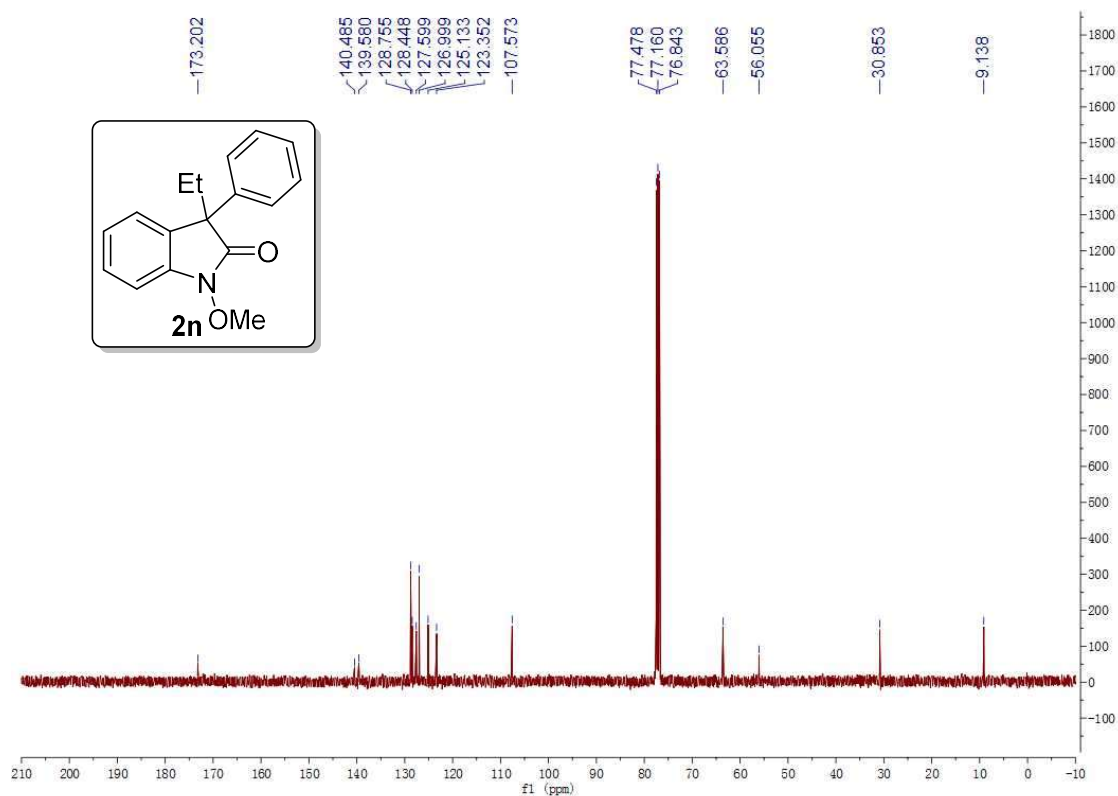

**<sup>13</sup>C NMR Spectrum of **2n** (CDCl<sub>3</sub>, 100 MHz)**

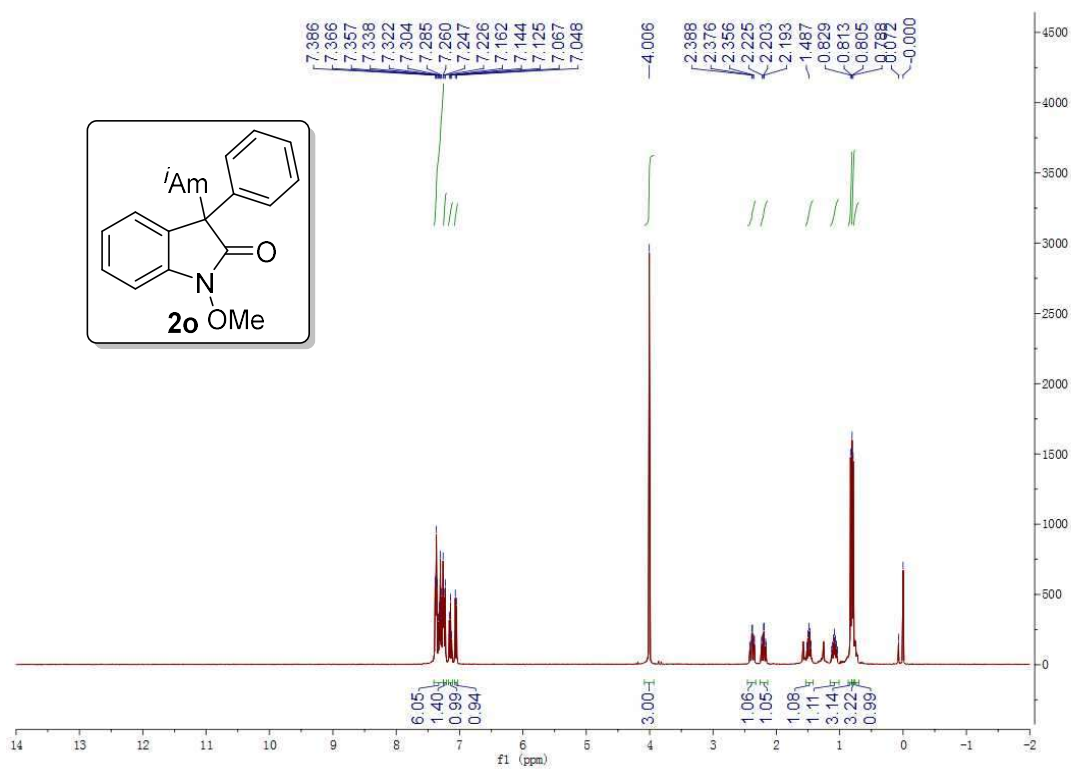

**<sup>1</sup>H NMR Spectrum of **2o** (CDCl<sub>3</sub>, 400 MHz)**

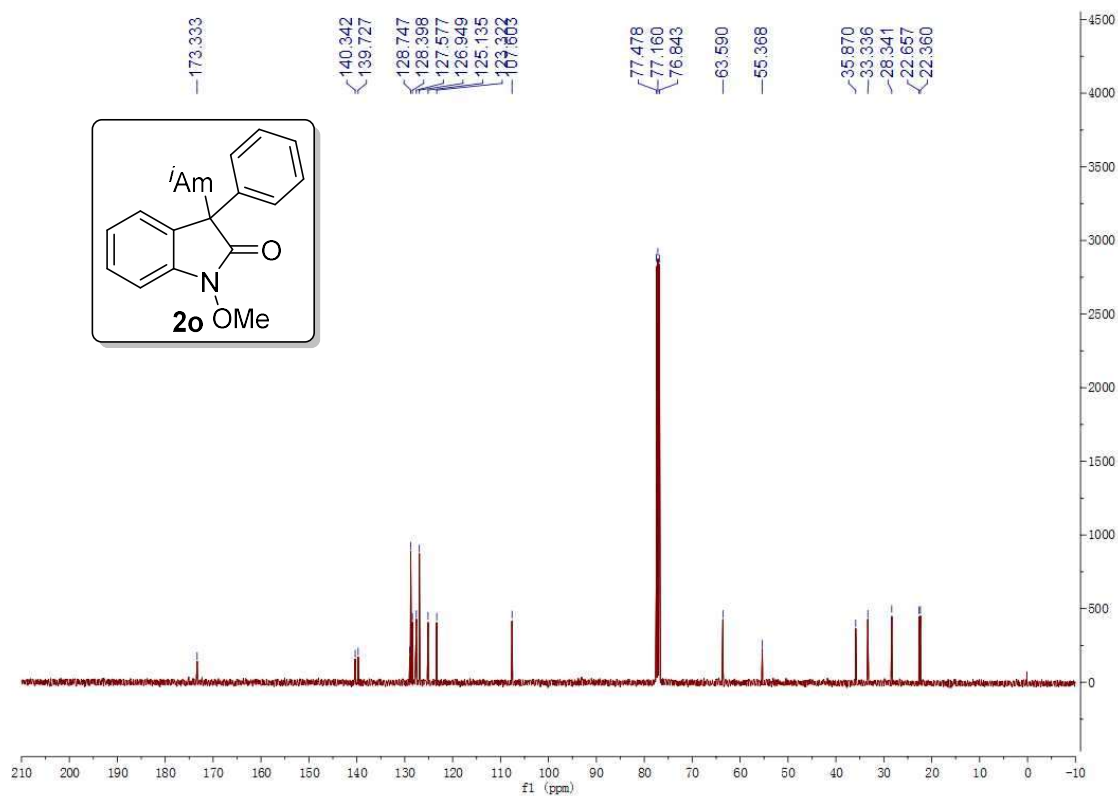

**<sup>13</sup>C NMR Spectrum of **2o** (CDCl<sub>3</sub>, 100 MHz)**

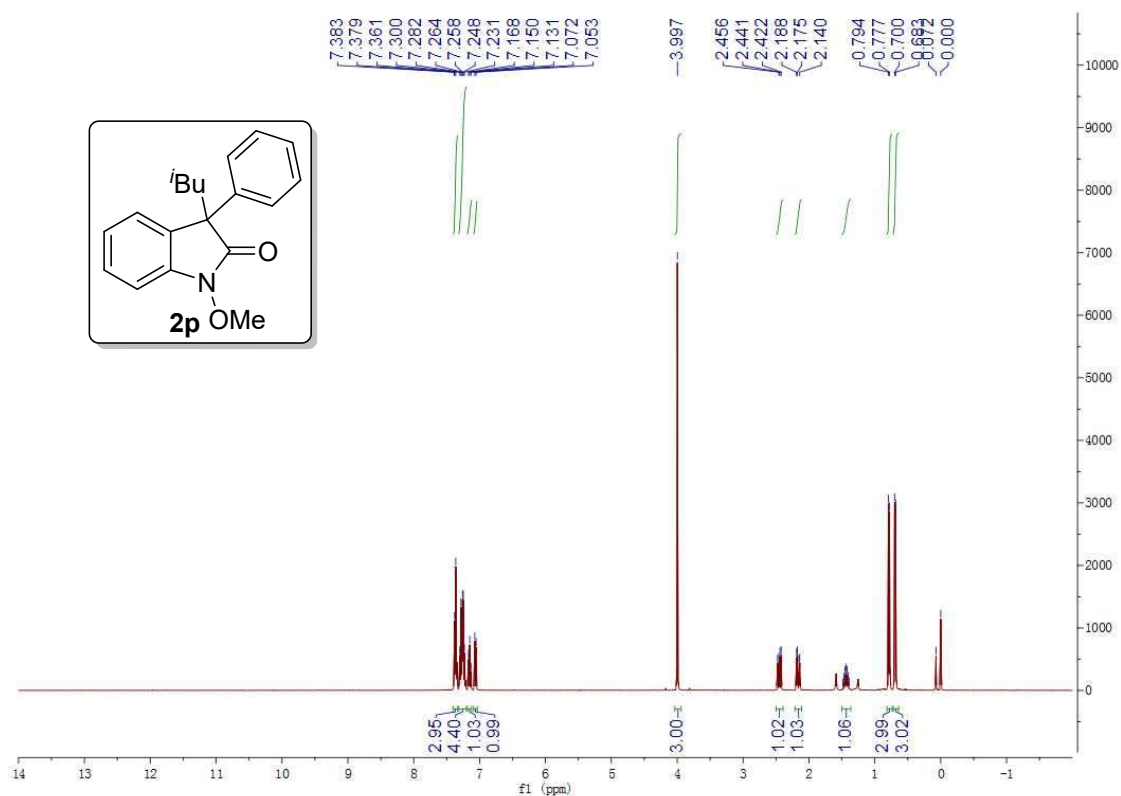

<sup>1</sup>H NMR Spectrum of **2p** (CDCl<sub>3</sub>, 400 MHz)

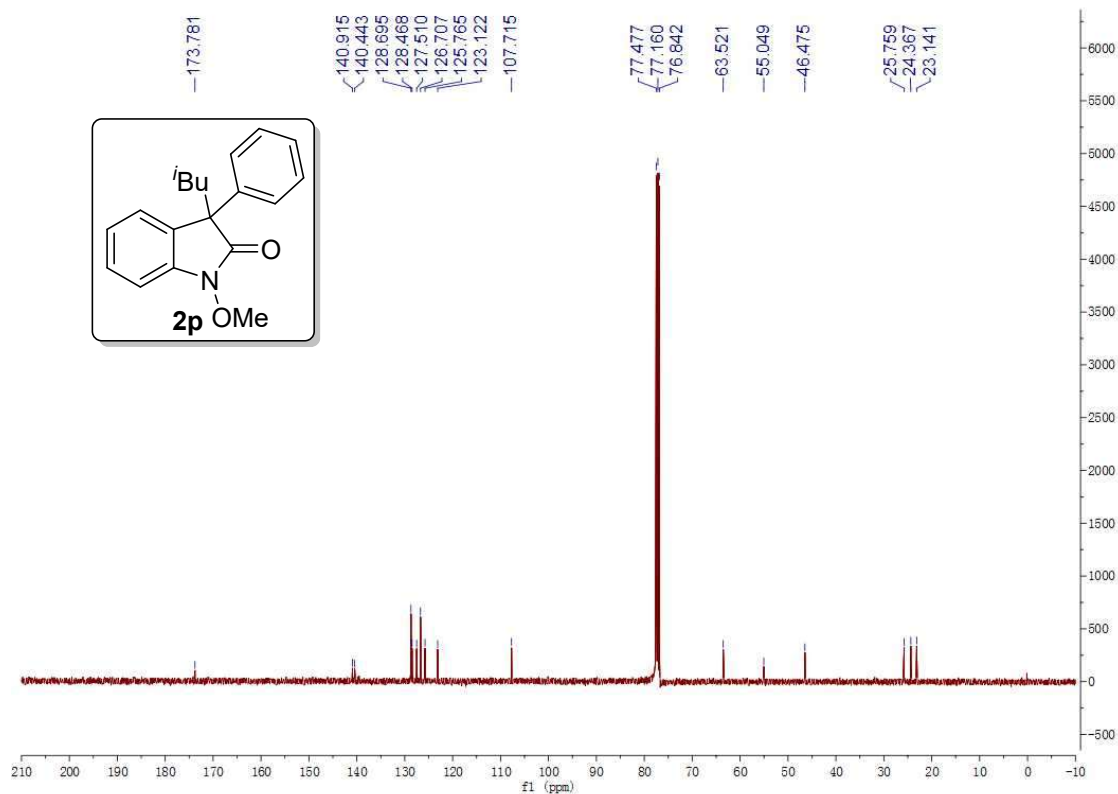

<sup>13</sup>C NMR Spectrum of **2p** (CDCl<sub>3</sub>, 100 MHz)

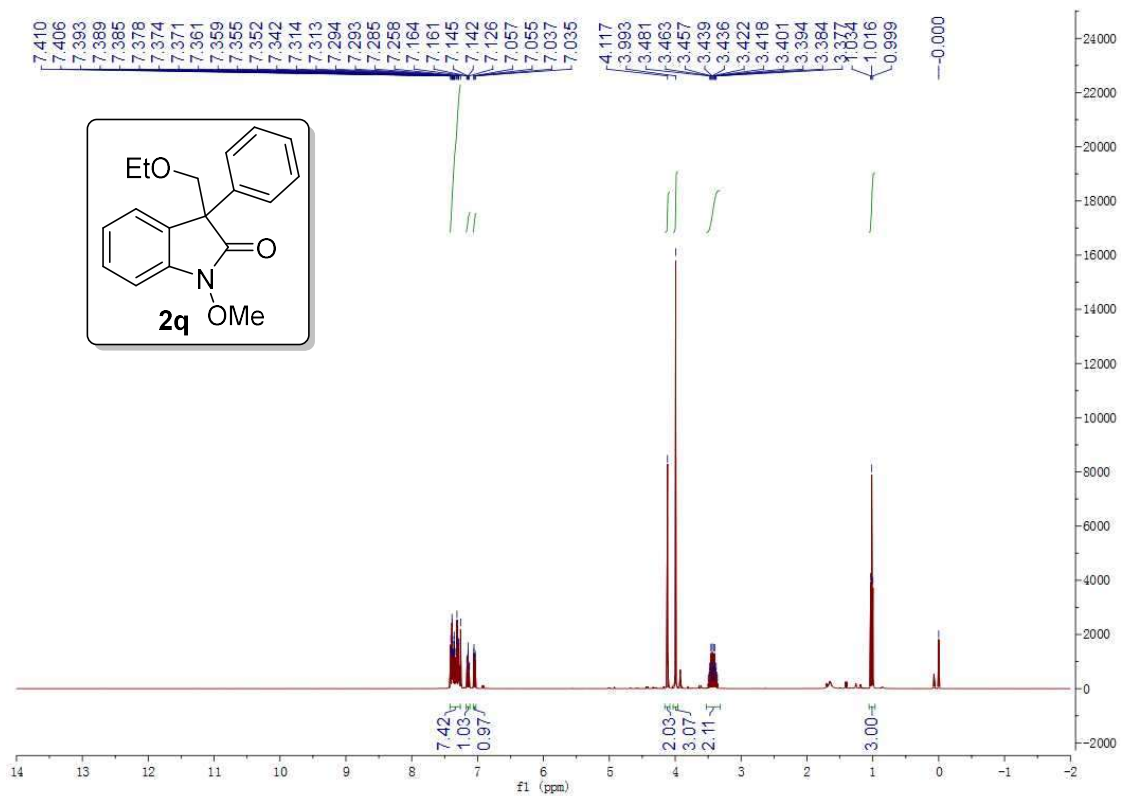

<sup>1</sup>H NMR Spectrum of **2q** (CDCl<sub>3</sub>, 400 MHz)

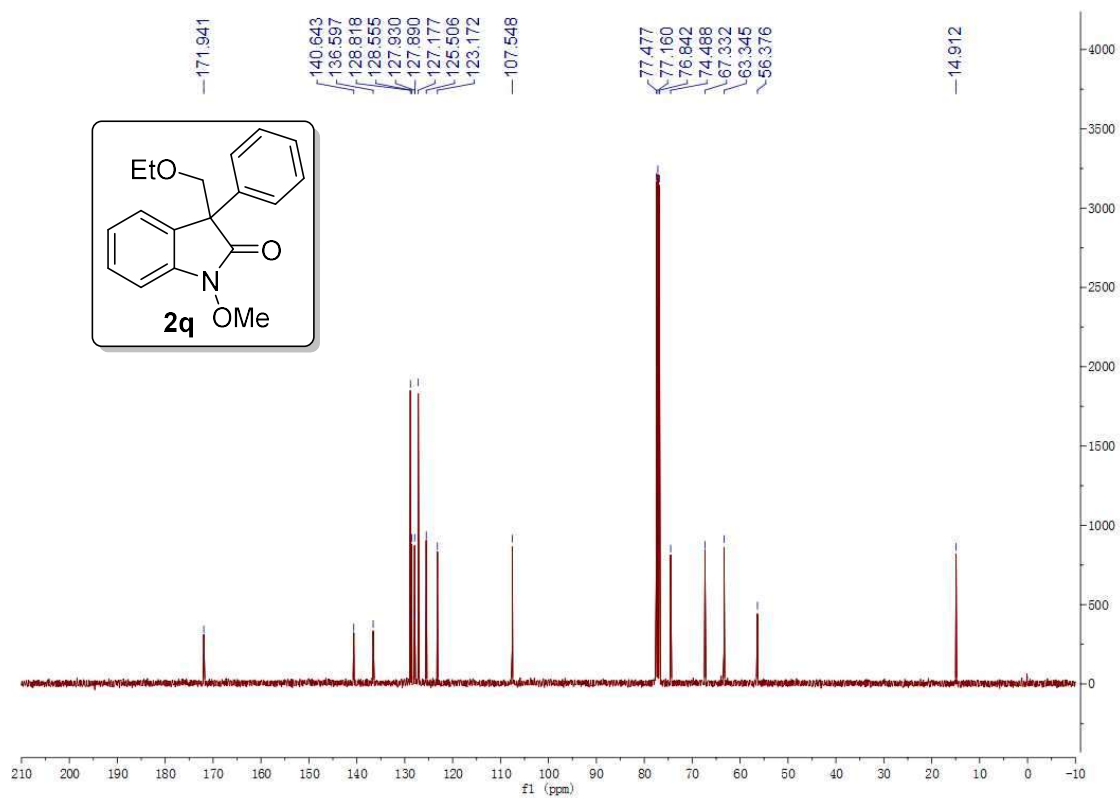

<sup>13</sup>C NMR Spectrum of **2q** (CDCl<sub>3</sub>, 100 MHz)



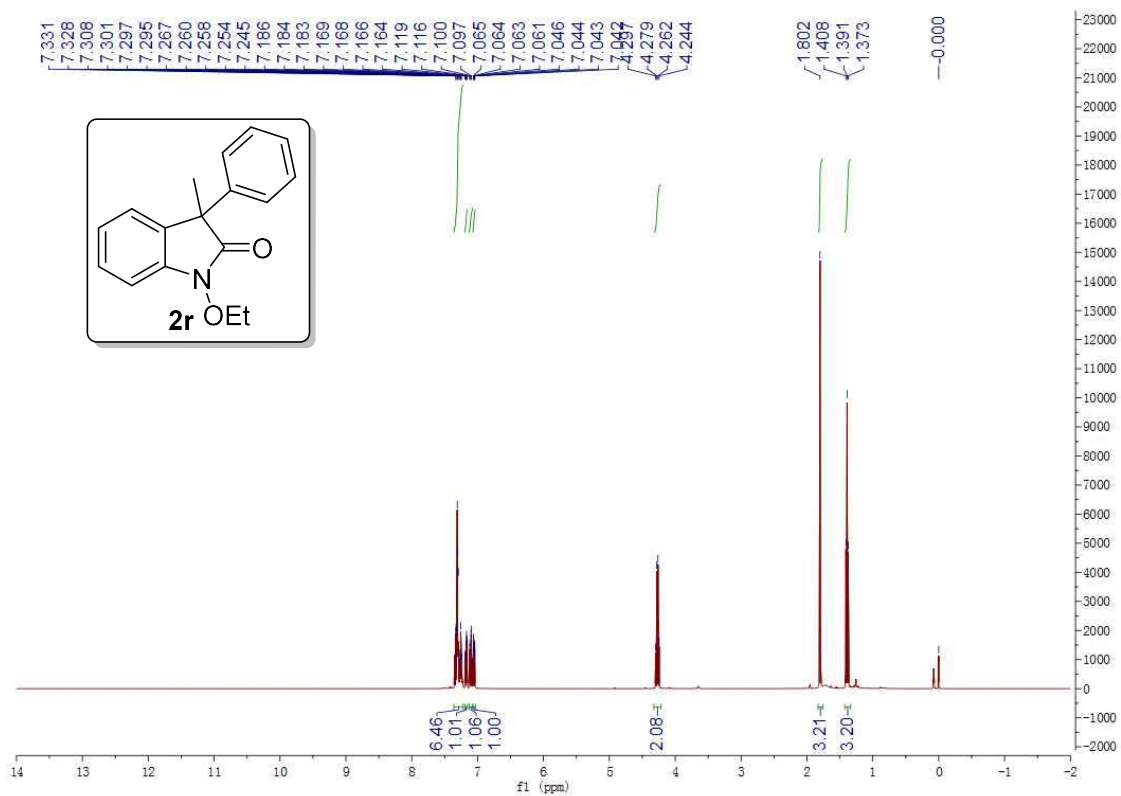

**<sup>1</sup>H NMR Spectrum of 2r (CDCl<sub>3</sub>, 400 MHz)**

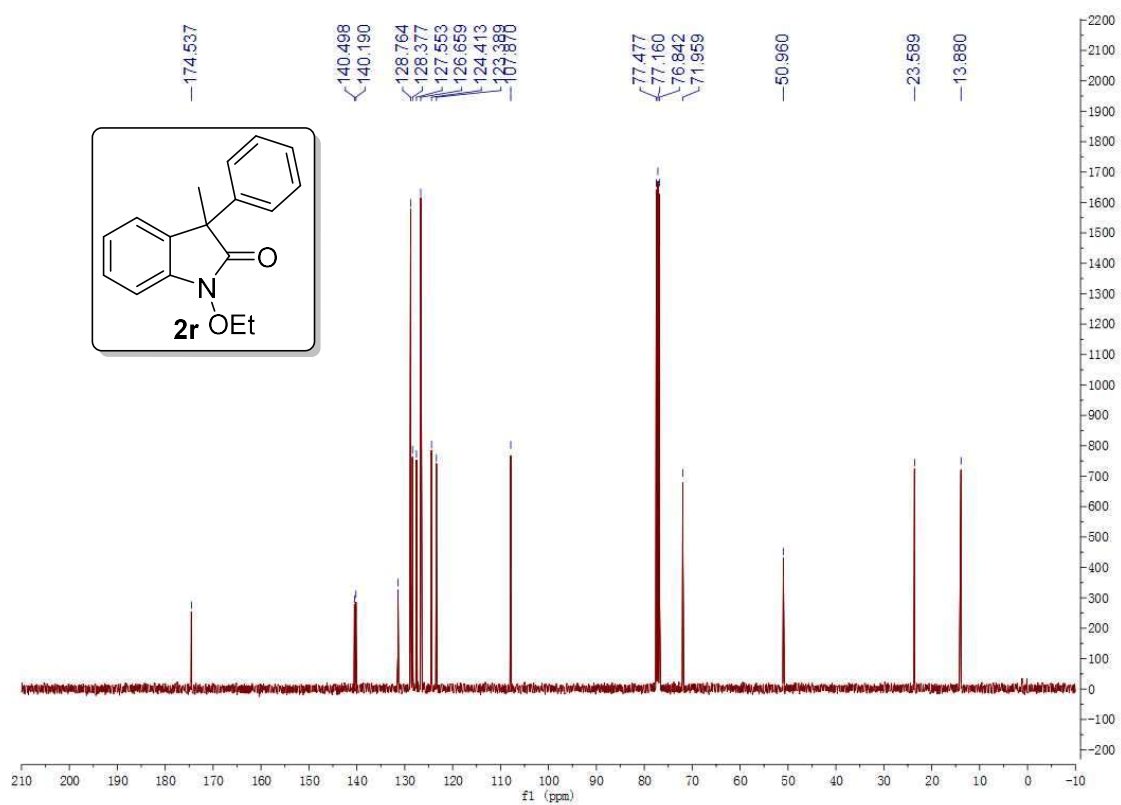

**<sup>13</sup>C NMR Spectrum of 2r (CDCl<sub>3</sub>, 100 MHz)**

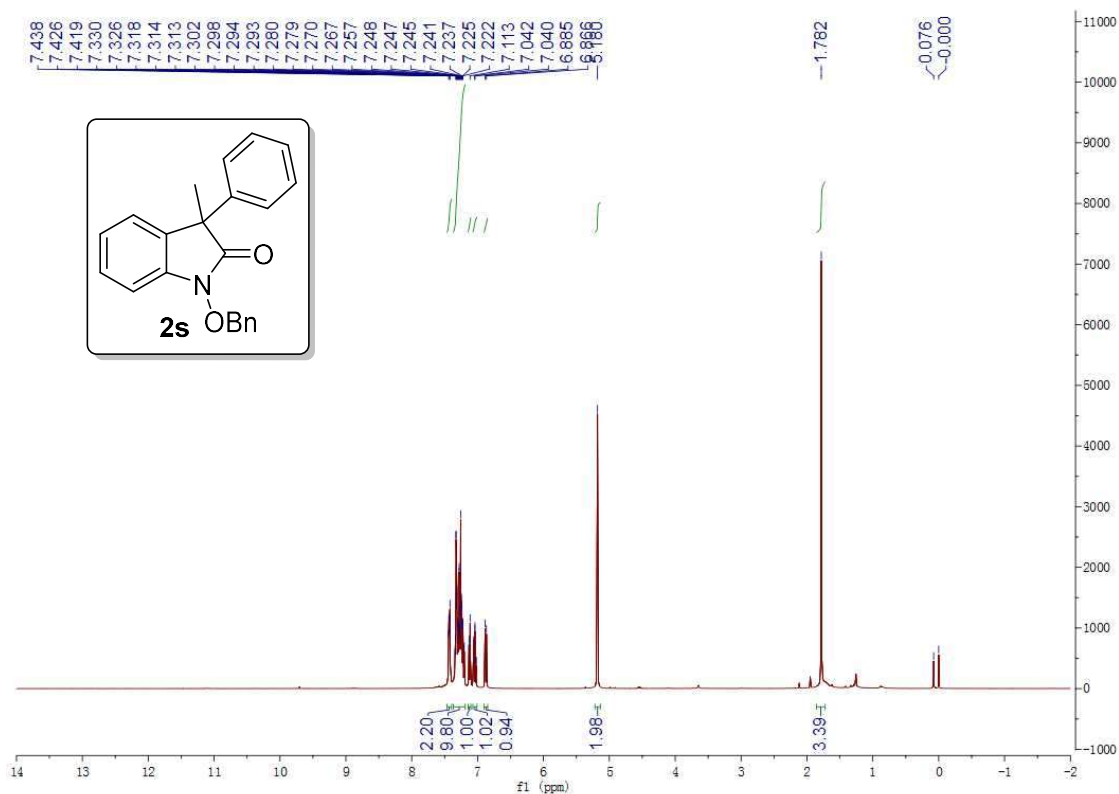

**<sup>1</sup>H NMR Spectrum of 2s (CDCl<sub>3</sub>, 400 MHz)**

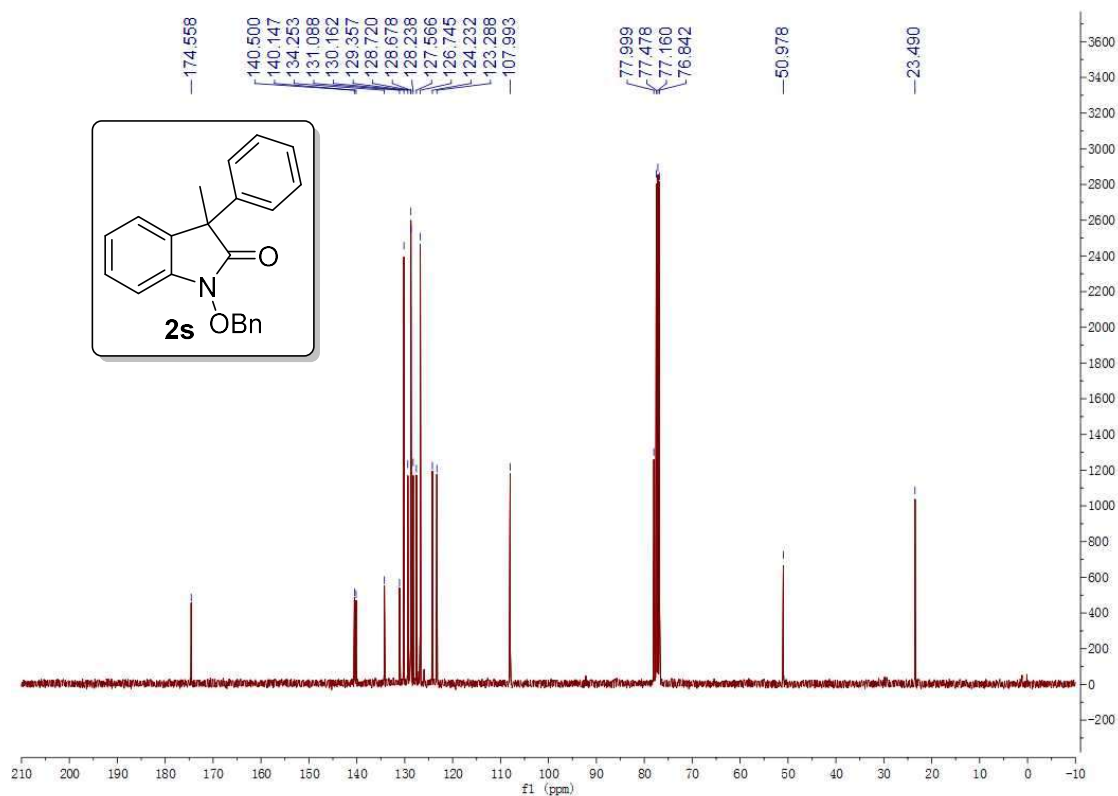

**<sup>13</sup>C NMR Spectrum of 2s (CDCl<sub>3</sub>, 100 MHz)**

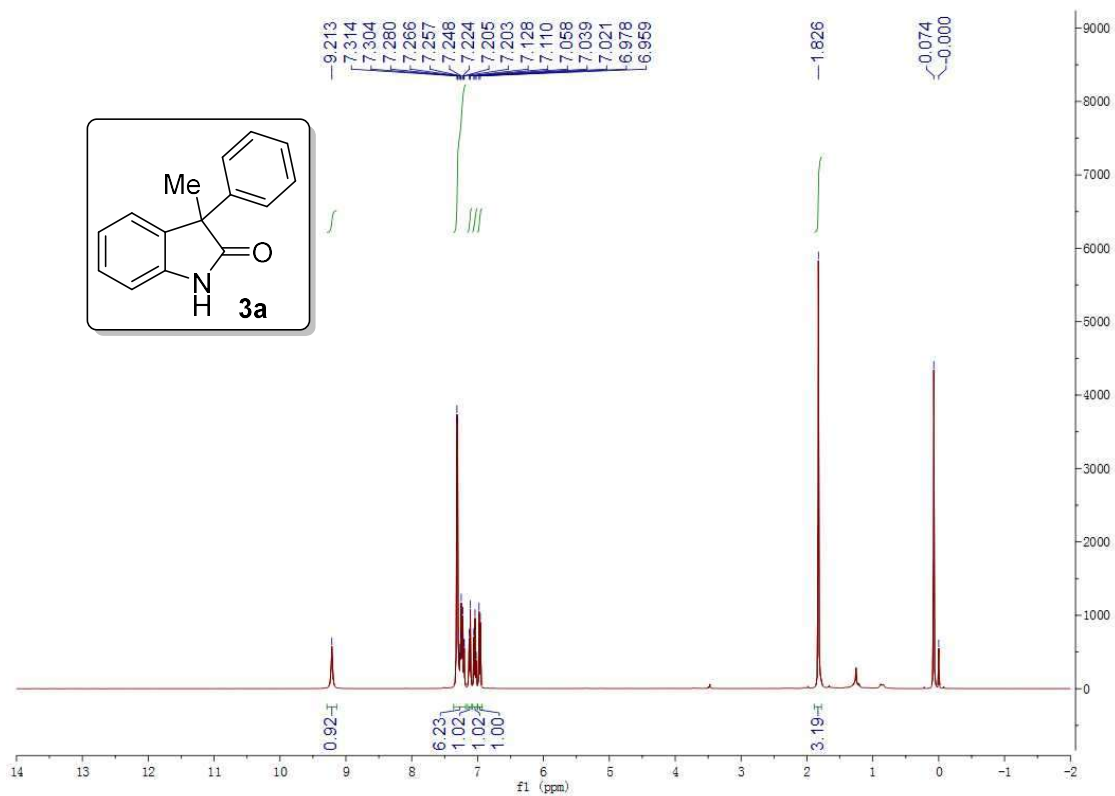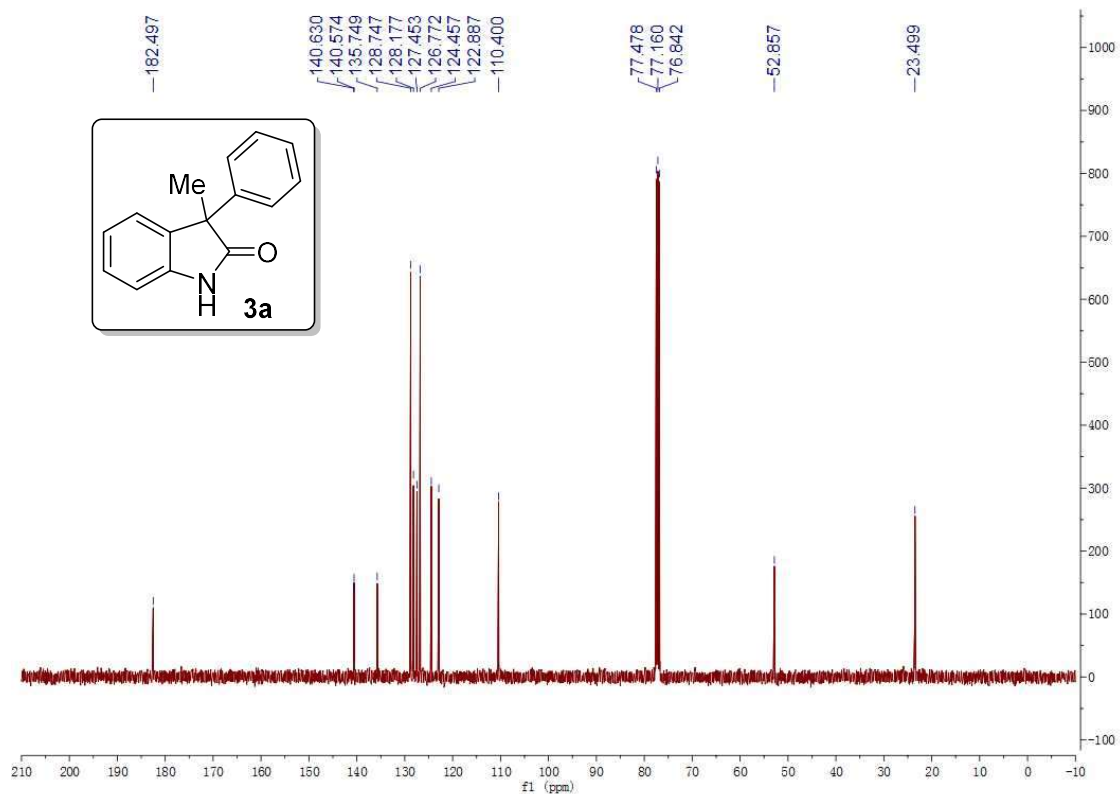

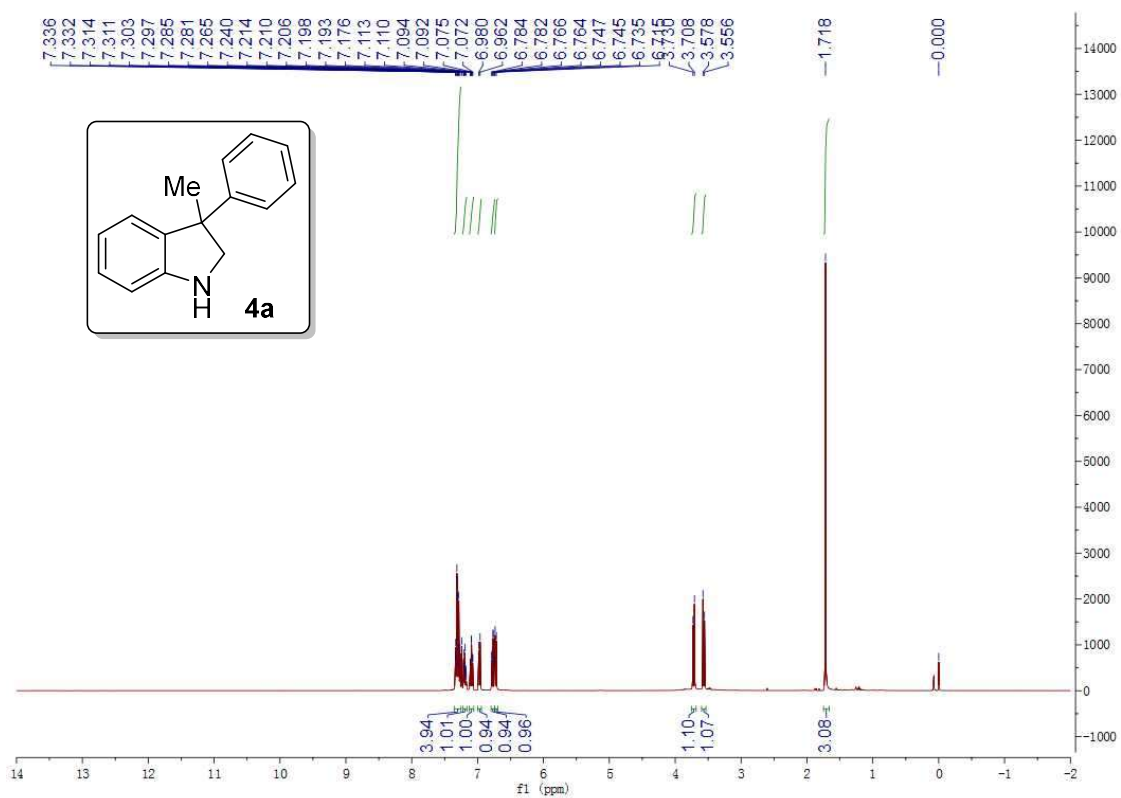

<sup>1</sup>H NMR Spectrum of **4a** (CDCl<sub>3</sub>, 400 MHz)

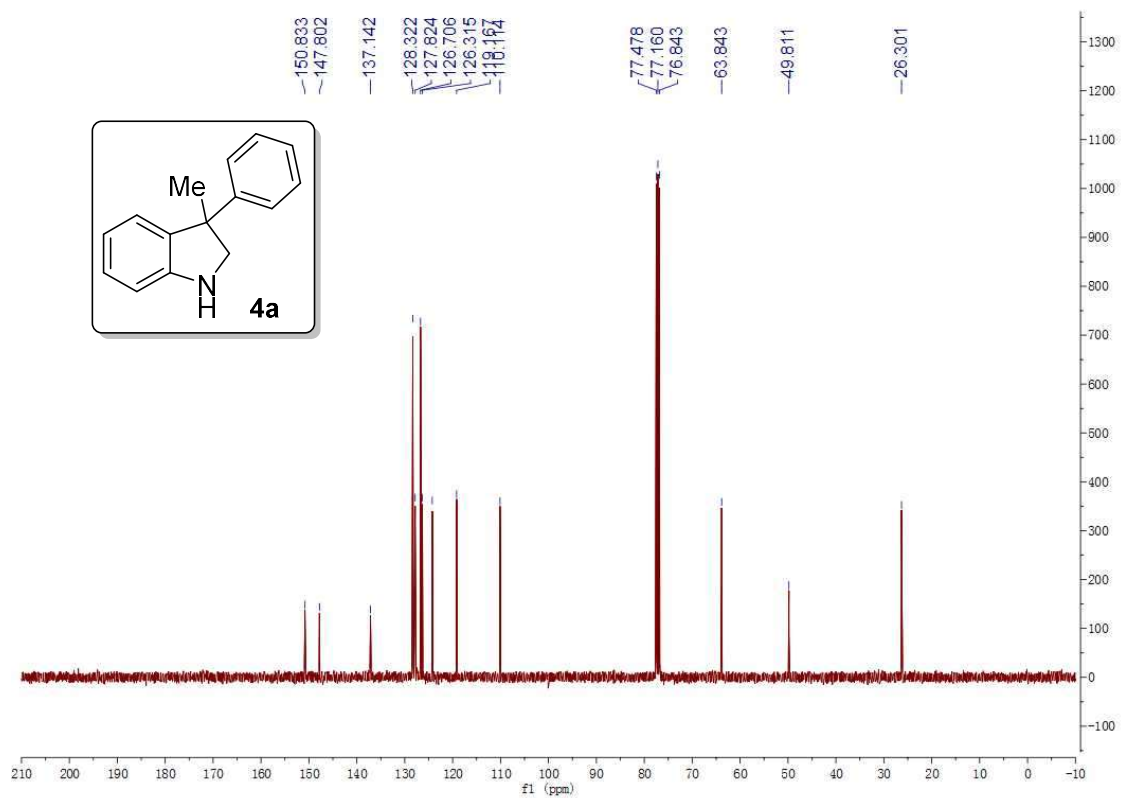

<sup>13</sup>C NMR Spectrum of **4a** (CDCl<sub>3</sub>, 100 MHz)

## Chiral HPLC Data

Chromatography  
mAU

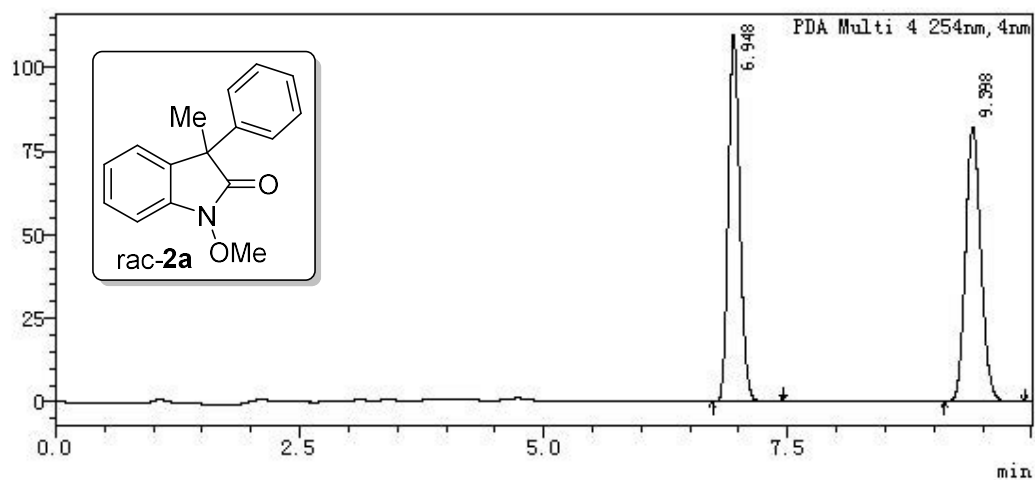

Table

PDA Ch4 254nm

| Number | Retention Time | Height | Height% | Area    | Area%   |
|--------|----------------|--------|---------|---------|---------|
| 1      | 6.948          | 109623 | 57.146  | 893872  | 49.912  |
| 2      | 9.398          | 82207  | 42.854  | 897031  | 50.088  |
| 总计     |                | 191830 | 100.000 | 1790903 | 100.000 |

Chromatography  
mAU

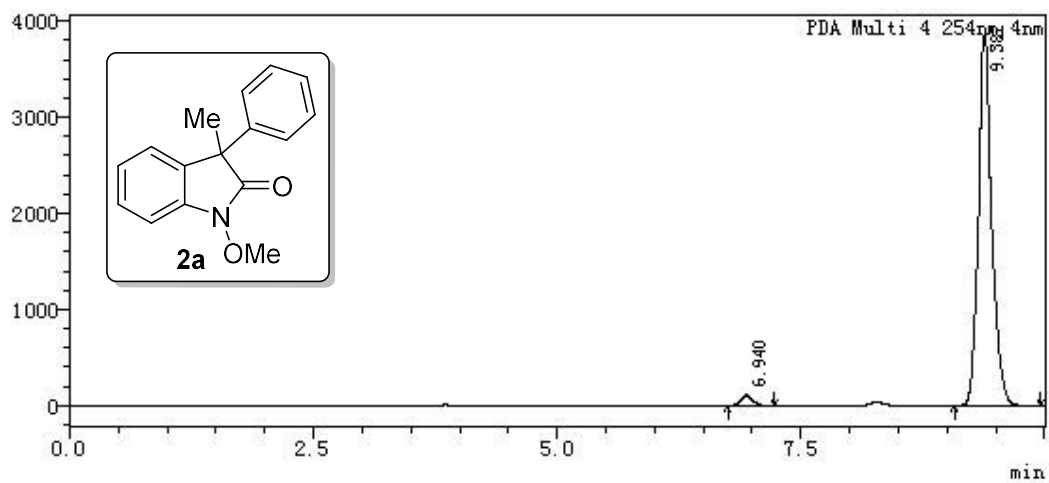

Table

PDA Ch4 254nm

| Number | Retention Time | Height  | Height% | Area     | Area%   |
|--------|----------------|---------|---------|----------|---------|
| 1      | 6.940          | 109248  | 2.761   | 885466   | 2.348   |
| 2      | 9.382          | 3847309 | 97.239  | 36824022 | 97.652  |
| 总计     |                | 3956557 | 100.000 | 37709488 | 100.000 |

Chromatography  
mAU

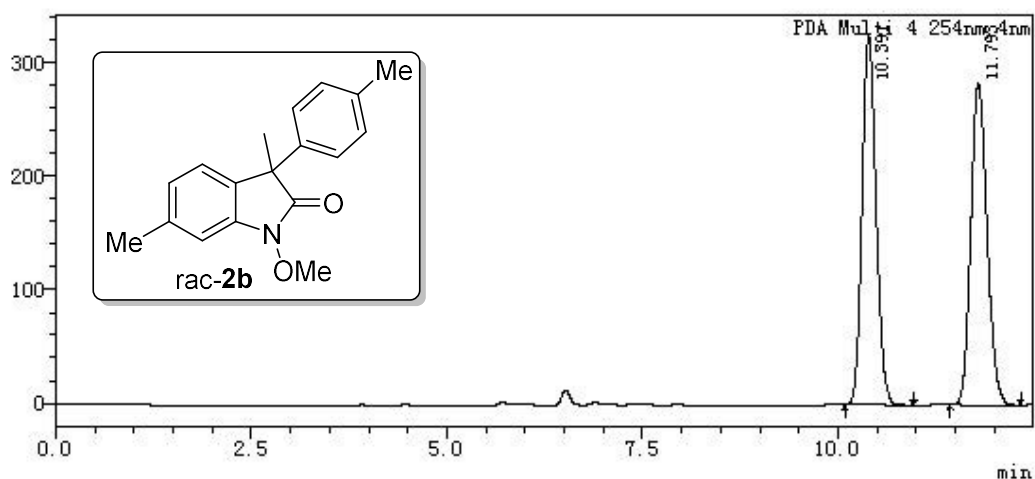

Table

PDA Ch4 254nm

| Number | Retention Time | Height | Height% | Area    | Area%   |
|--------|----------------|--------|---------|---------|---------|
| 1      | 10.391         | 324770 | 53.450  | 4027563 | 49.669  |
| 2      | 11.793         | 282841 | 46.550  | 4081188 | 50.331  |
| 总计     |                | 607611 | 100.000 | 8108750 | 100.000 |

Chromatography  
mAU

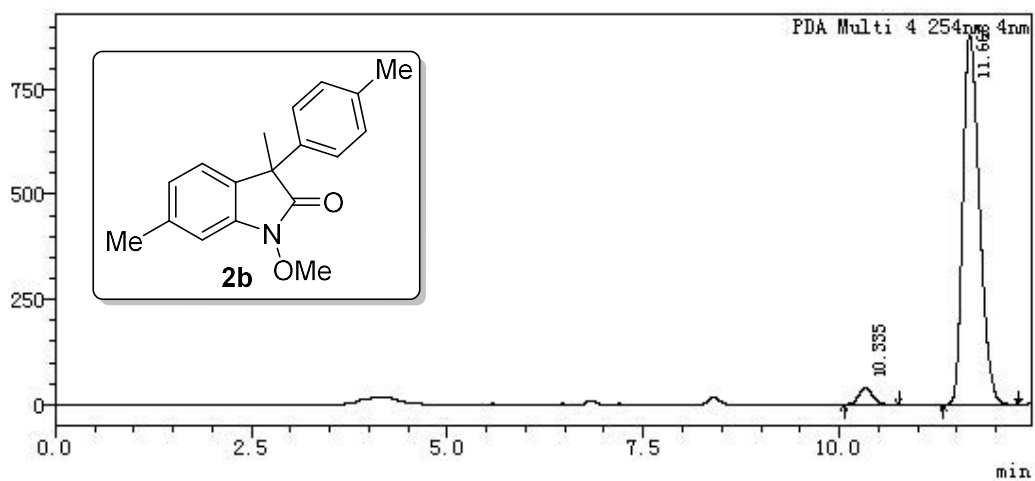

Table

PDA Ch4 254nm

| Number | Retention Time | Height | Height% | Area     | Area%   |
|--------|----------------|--------|---------|----------|---------|
| 1      | 10.335         | 39977  | 4.343   | 490396   | 3.645   |
| 2      | 11.668         | 880453 | 95.657  | 12962472 | 96.355  |
| 总计     |                | 920430 | 100.000 | 13452868 | 100.000 |

Chromatography  
mAU

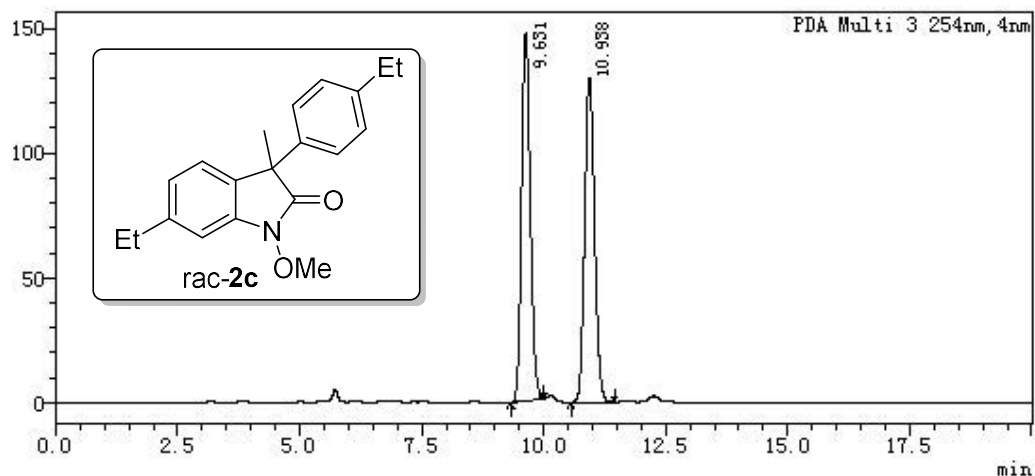

Table

PDA Ch3 254nm

| Number | Retention Time | Height | Height% | Area    | Area%   |
|--------|----------------|--------|---------|---------|---------|
| 1      | 9.631          | 147558 | 53.198  | 1828537 | 50.202  |
| 2      | 10.938         | 129818 | 46.802  | 1813823 | 49.798  |
| 总计     |                | 277377 | 100.000 | 3642360 | 100.000 |

Chromatography  
mAU

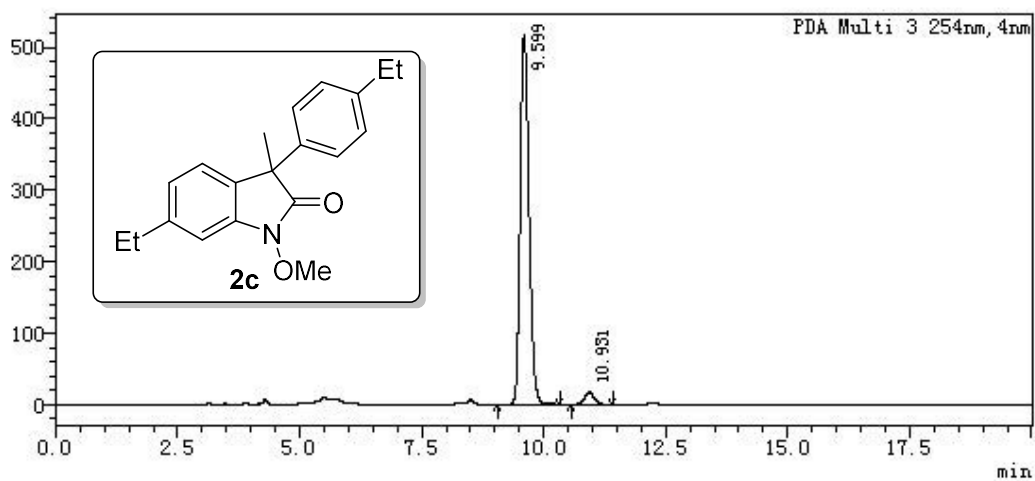

Table

PDA Ch3 254nm

| Number | Retention Time | Height | Height% | Area    | Area%   |
|--------|----------------|--------|---------|---------|---------|
| 1      | 9.599          | 517051 | 96.755  | 6466577 | 96.384  |
| 2      | 10.931         | 17341  | 3.245   | 242570  | 3.616   |
| 总计     |                | 534391 | 100.000 | 6709147 | 100.000 |

Chromatography  
mAU

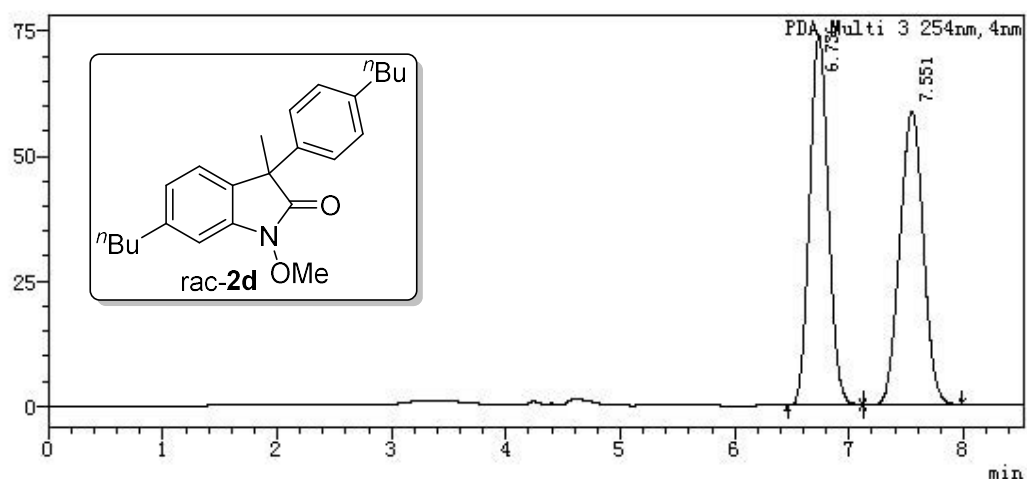

Table  
PDA Ch3 254nm

| Number | Retention Time | Height | Height% | Area    | Area%   |
|--------|----------------|--------|---------|---------|---------|
| 1      | 6.736          | 73745  | 55.734  | 833184  | 50.078  |
| 2      | 7.551          | 58570  | 44.266  | 830592  | 49.922  |
| 总计     |                | 132315 | 100.000 | 1663776 | 100.000 |

Chromatography  
mAU

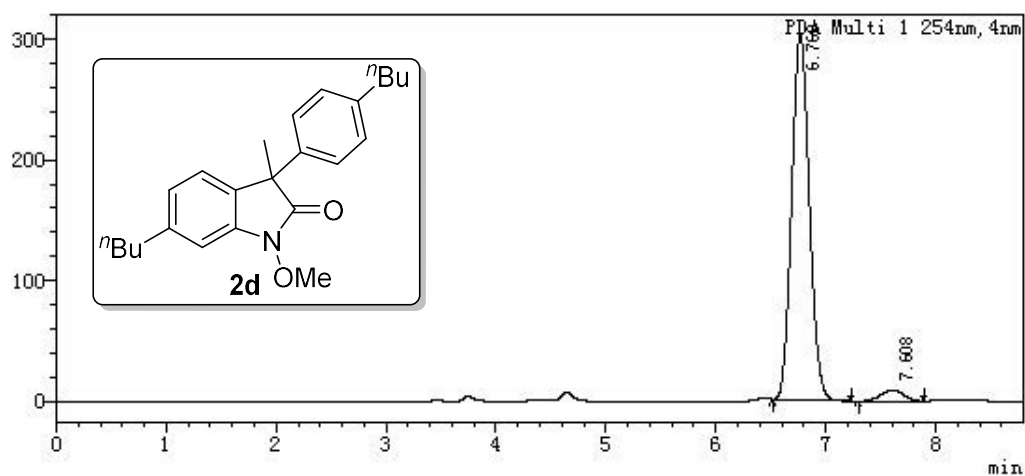

Table  
PDA Ch1 254nm

| Number | Retention Time | Height | Height% | Area    | Area%   |
|--------|----------------|--------|---------|---------|---------|
| 1      | 6.768          | 302121 | 97.024  | 3359483 | 96.330  |
| 2      | 7.608          | 9268   | 2.976   | 127991  | 3.670   |
| 总计     |                | 311389 | 100.000 | 3487474 | 100.000 |



Chromatography  
mAU

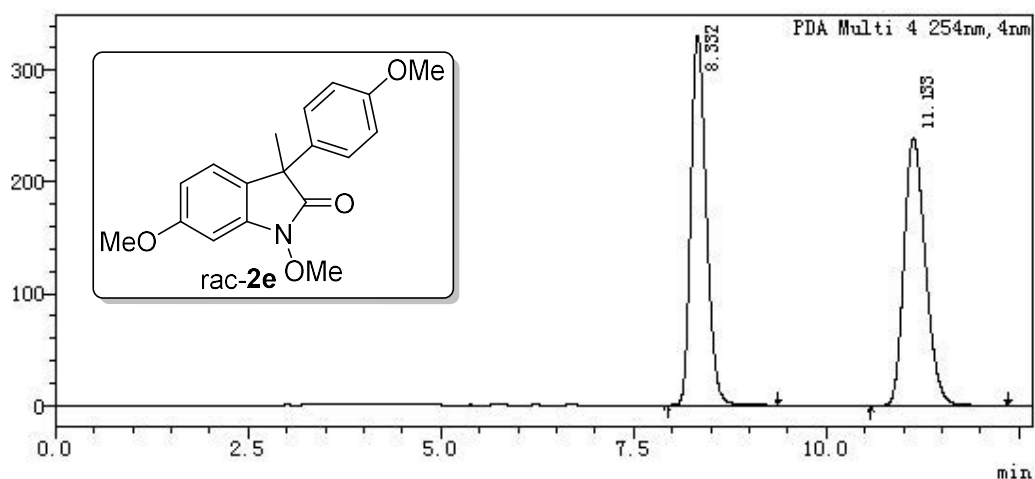

Table

PDA Ch4 254nm

| Number | Retention Time | Height | Height% | Area    | Area%   |
|--------|----------------|--------|---------|---------|---------|
| 1      | 8.332          | 330643 | 58.066  | 4610872 | 49.977  |
| 2      | 11.133         | 238779 | 41.934  | 4615184 | 50.023  |
| 总计     |                | 569422 | 100.000 | 9226057 | 100.000 |

Chromatography  
mAU

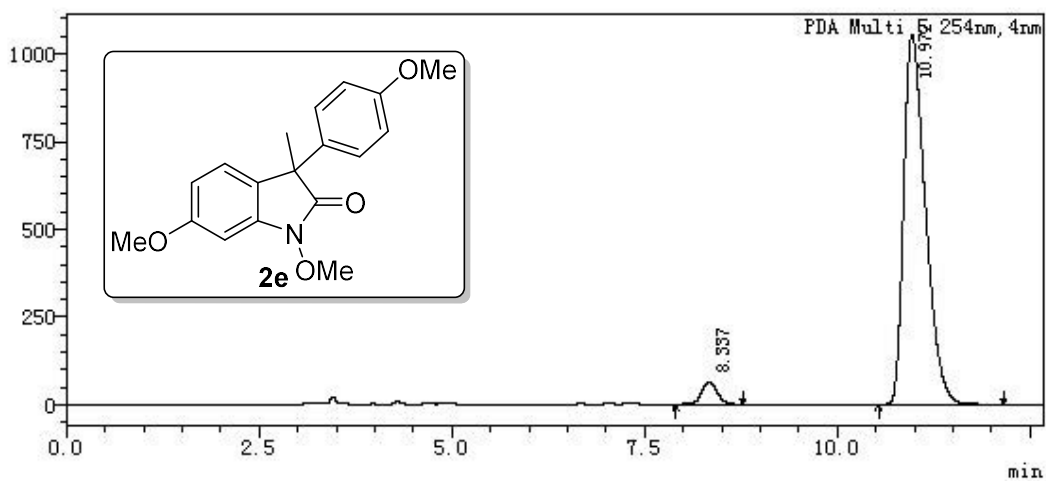

Table

PDA Ch5 254nm

| Number | Retention Time | Height  | Height% | Area     | Area%   |
|--------|----------------|---------|---------|----------|---------|
| 1      | 8.337          | 63966   | 5.725   | 892677   | 4.141   |
| 2      | 10.972         | 1053334 | 94.275  | 20666238 | 95.859  |
| 总计     |                | 1117299 | 100.000 | 21558915 | 100.000 |

Chromatography  
mAU

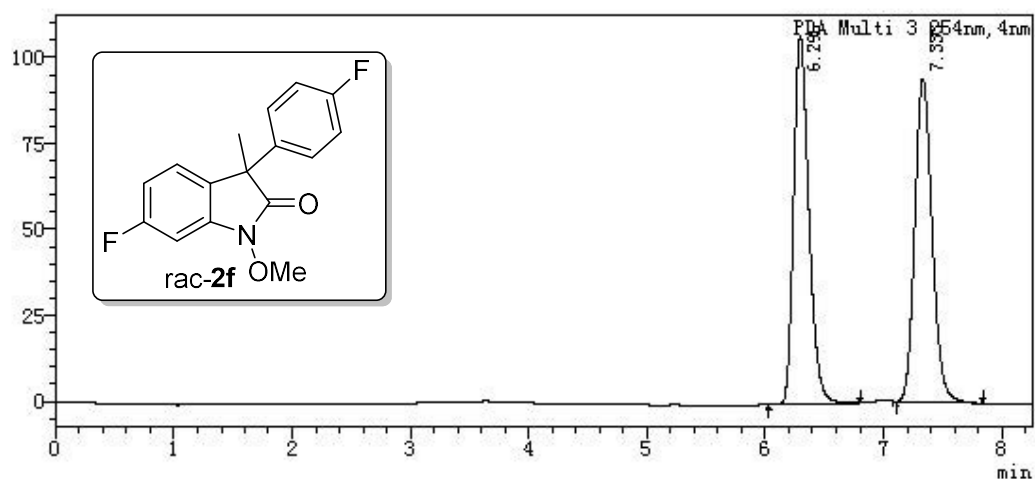

Table

PDA Ch3 254nm

| Number | Retention Time | Height | Height% | Area    | Area%   |
|--------|----------------|--------|---------|---------|---------|
| 1      | 6.296          | 107149 | 53.288  | 958787  | 50.108  |
| 2      | 7.333          | 93927  | 46.712  | 954650  | 49.892  |
| 总计     |                | 201076 | 100.000 | 1913436 | 100.000 |

Chromatography  
mAU

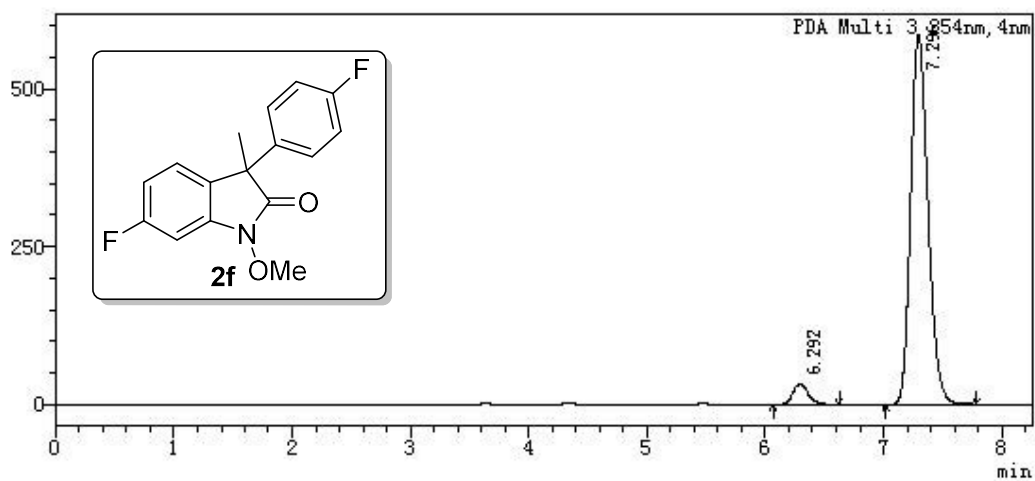

Table

PDA Ch3 254nm

| Number | Retention Time | Height | Height% | Area    | Area%   |
|--------|----------------|--------|---------|---------|---------|
| 1      | 6.292          | 32687  | 5.289   | 291399  | 4.698   |
| 2      | 7.296          | 585380 | 94.711  | 5910955 | 95.302  |
| 总计     |                | 618067 | 100.000 | 6202354 | 100.000 |

Chromatography  
mAU

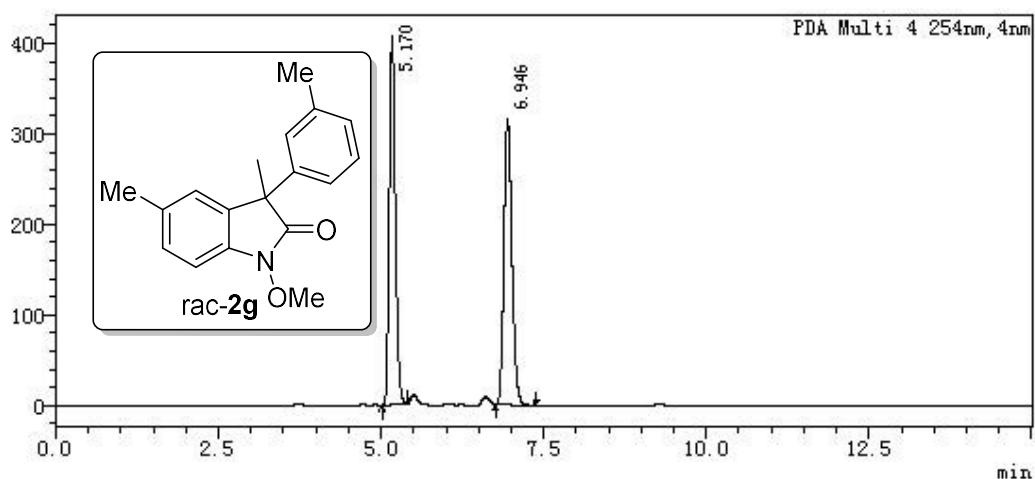

Table

PDA Ch4 254nm

| Number | Retention Time | Height | Height% | Area    | Area%   |
|--------|----------------|--------|---------|---------|---------|
| 1      | 5.170          | 407490 | 56.325  | 2646988 | 49.485  |
| 2      | 6.946          | 315966 | 43.675  | 2702058 | 50.515  |
| 总计     |                | 723455 | 100.000 | 5349046 | 100.000 |

Chromatography  
mAU

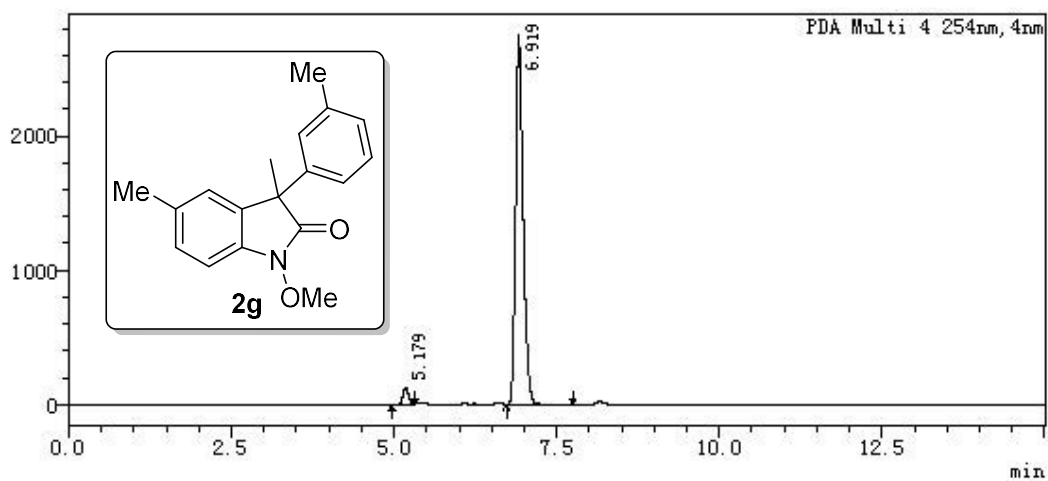

Table

PDA Ch4 254nm

| Number | Retention Time | Height  | Height% | Area     | Area%   |
|--------|----------------|---------|---------|----------|---------|
| 1      | 5.179          | 123223  | 4.285   | 801585   | 3.548   |
| 2      | 6.919          | 2752246 | 95.715  | 21792764 | 96.452  |
| 总计     |                | 2875469 | 100.000 | 22594349 | 100.000 |

Chromatography  
mAU

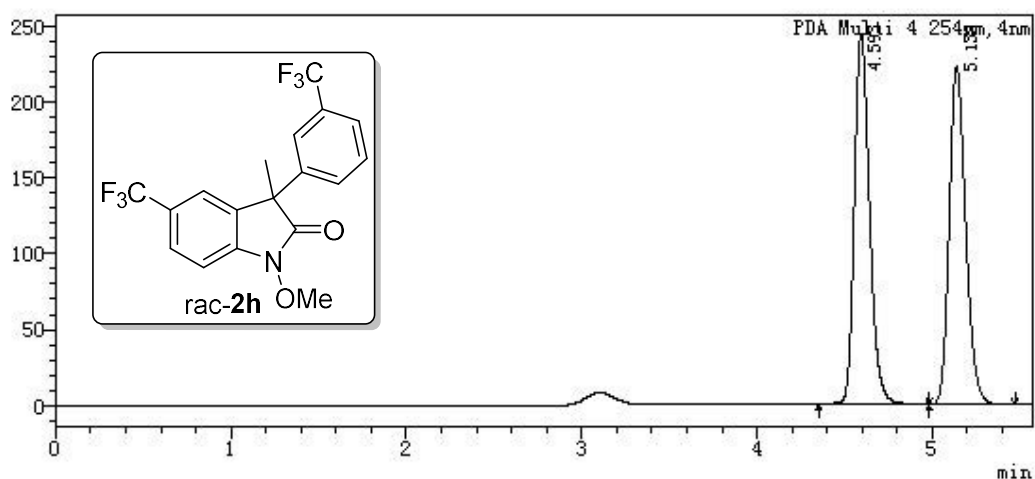

Table

PDA Ch4 254nm

| Number | Retention Time | Height | Height% | Area    | Area%   |
|--------|----------------|--------|---------|---------|---------|
| 1      | 4.593          | 242735 | 52.144  | 1463789 | 50.387  |
| 2      | 5.138          | 222778 | 47.856  | 1441283 | 49.613  |
| 总计     |                | 465514 | 100.000 | 2905072 | 100.000 |

Chromatography  
mAU

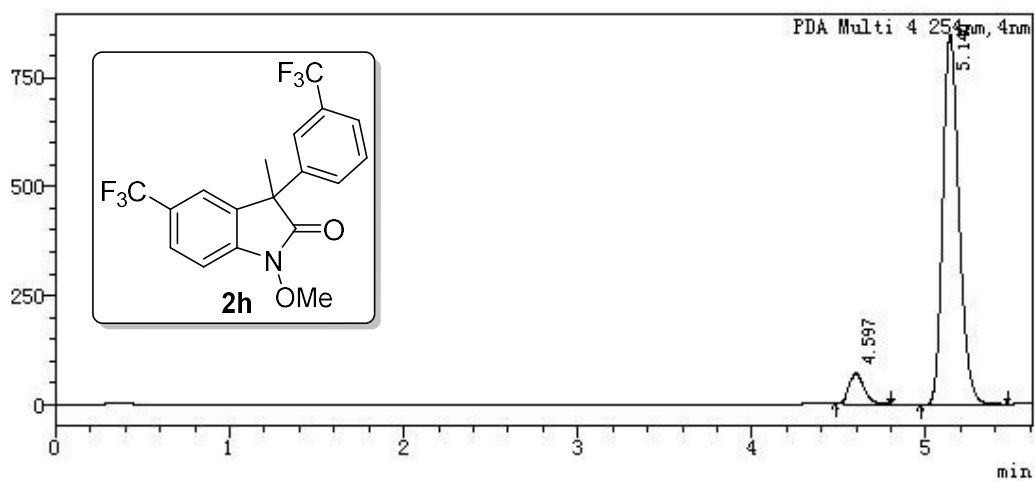

Table

PDA Ch4 254nm

| Number | Retention Time | Height | Height% | Area    | Area%   |
|--------|----------------|--------|---------|---------|---------|
| 1      | 4.597          | 70318  | 7.666   | 409422  | 6.992   |
| 2      | 5.140          | 846923 | 92.334  | 5446469 | 93.008  |
| 总计     |                | 917241 | 100.000 | 5855892 | 100.000 |

Chromatography  
mAU

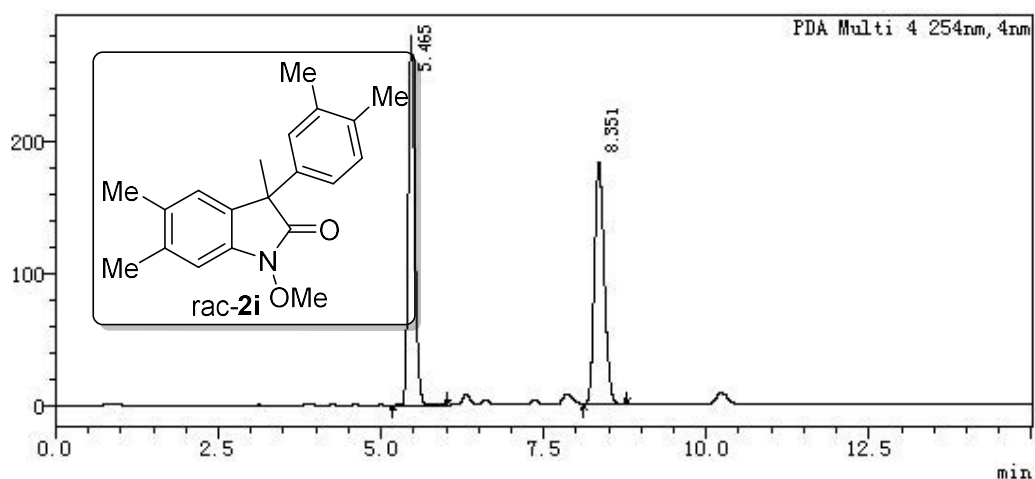

Table

PDA Ch4 254nm

| Number | Retention Time | Height | Height% | Area    | Area%   |
|--------|----------------|--------|---------|---------|---------|
| 1      | 5.465          | 280104 | 60.357  | 1966452 | 50.518  |
| 2      | 8.351          | 183972 | 39.643  | 1926160 | 49.482  |
| 总计     |                | 464077 | 100.000 | 3892612 | 100.000 |

Chromatography  
mAU

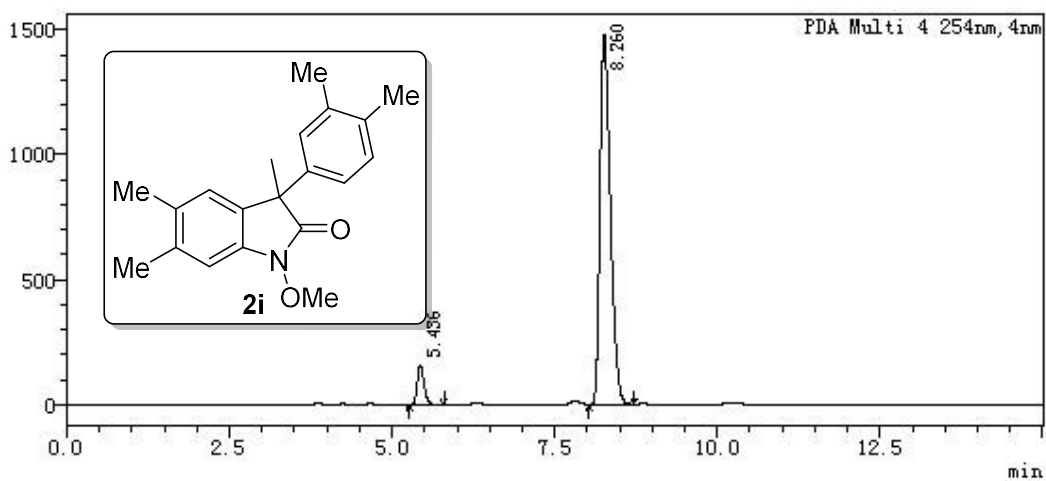

Table

PDA Ch4 254nm

| Number | Retention Time | Height  | Height% | Area     | Area%   |
|--------|----------------|---------|---------|----------|---------|
| 1      | 5.436          | 157524  | 9.630   | 1111152  | 6.376   |
| 2      | 8.260          | 1478188 | 90.370  | 16317125 | 93.624  |
| 总计     |                | 1635712 | 100.000 | 17428277 | 100.000 |

Chromatography  
mAU

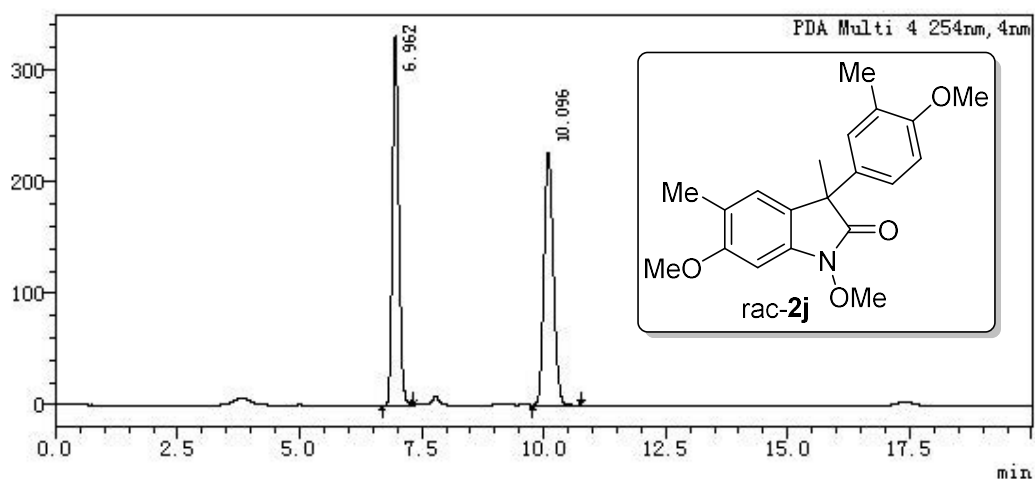

Table

PDA Ch4 254nm

| Number | Retention Time | Height | Height% | Area    | Area%   |
|--------|----------------|--------|---------|---------|---------|
| 1      | 6.962          | 330652 | 59.391  | 2997582 | 50.051  |
| 2      | 10.096         | 226090 | 40.609  | 2991471 | 49.949  |
| 总计     |                | 556742 | 100.000 | 5989053 | 100.000 |

Chromatography  
mAU

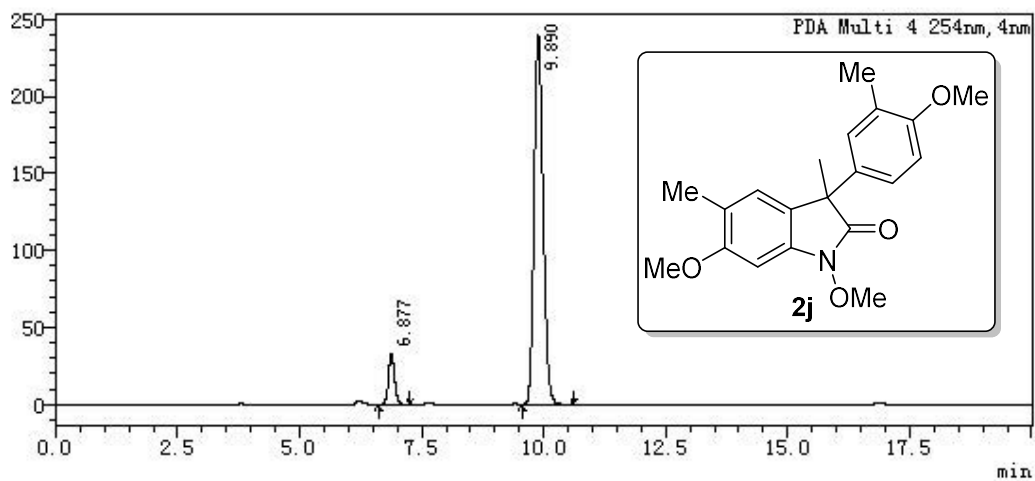

Table

PDA Ch4 254nm

| Number | Retention Time | Height | Height% | Area    | Area%   |
|--------|----------------|--------|---------|---------|---------|
| 1      | 6.877          | 32552  | 11.936  | 287873  | 8.504   |
| 2      | 9.890          | 240182 | 88.064  | 3097324 | 91.496  |
| 总计     |                | 272735 | 100.000 | 3385197 | 100.000 |

Chromatography  
mAU

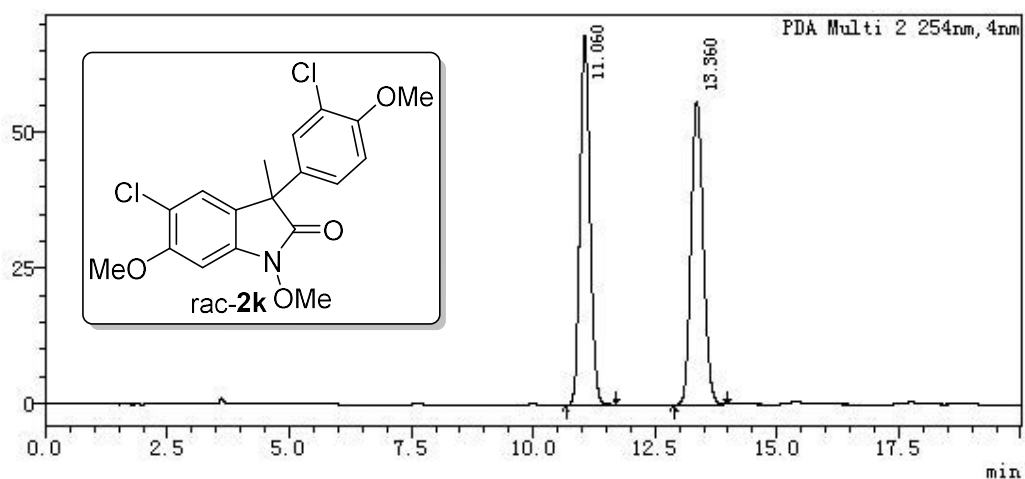

Table

PDA Ch2 254nm

| Number | Retention Time | Height | Height% | Area    | Area%   |
|--------|----------------|--------|---------|---------|---------|
| 1      | 11.060         | 68088  | 54.858  | 974871  | 49.963  |
| 2      | 13.360         | 56028  | 45.142  | 976125  | 50.037  |
| 总计     |                | 124116 | 100.000 | 1950796 | 100.000 |

Chromatography  
mAU

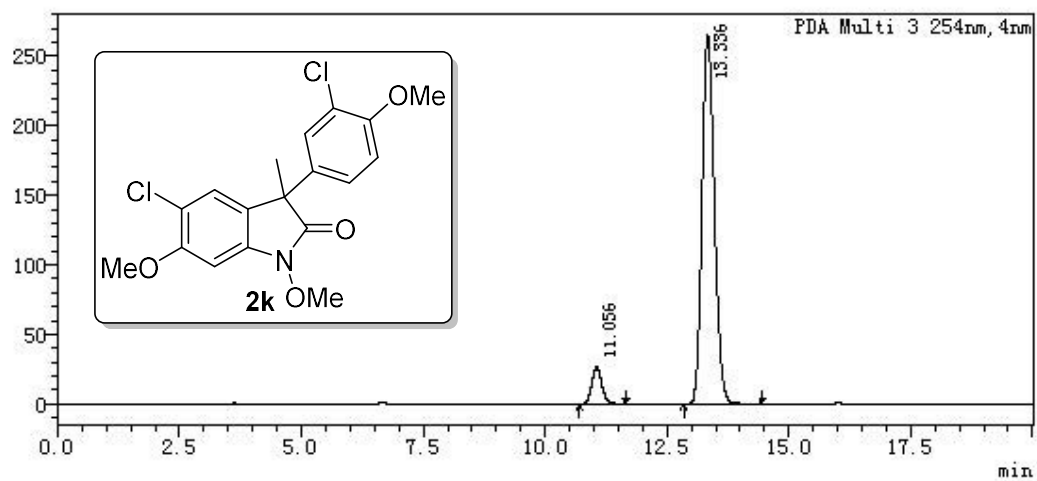

Table

PDA Ch3 254nm

| Number | Retention Time | Height | Height% | Area    | Area%   |
|--------|----------------|--------|---------|---------|---------|
| 1      | 11.056         | 26716  | 9.149   | 385568  | 7.648   |
| 2      | 13.336         | 265307 | 90.851  | 4655578 | 92.352  |
| 总计     |                | 292023 | 100.000 | 5041146 | 100.000 |

Chromatography  
mAU

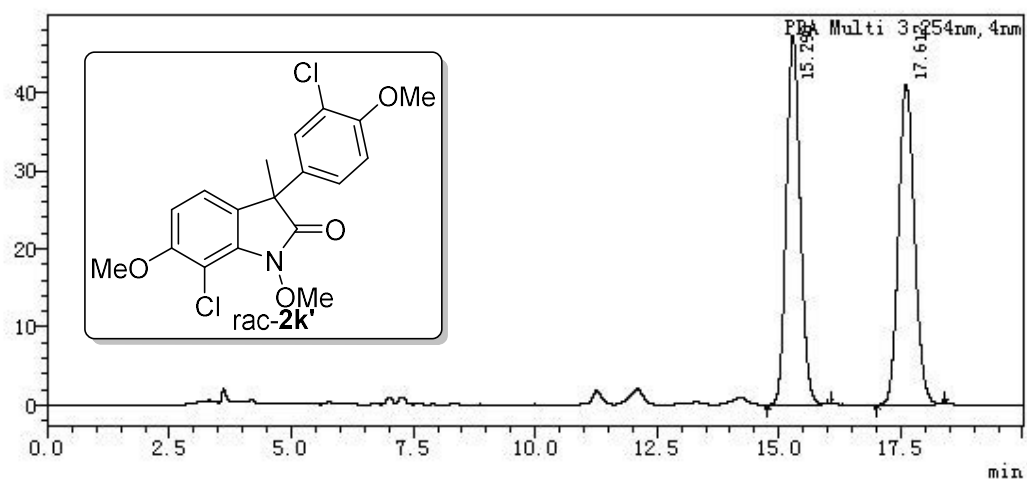

Table

PDA Ch3 254nm

| Number | Retention Time | Height | Height% | Area    | Area%   |
|--------|----------------|--------|---------|---------|---------|
| 1      | 15.290         | 47209  | 53.518  | 934996  | 49.977  |
| 2      | 17.612         | 41003  | 46.482  | 935862  | 50.023  |
| 总计     |                | 88211  | 100.000 | 1870859 | 100.000 |

Chromatography  
mAU

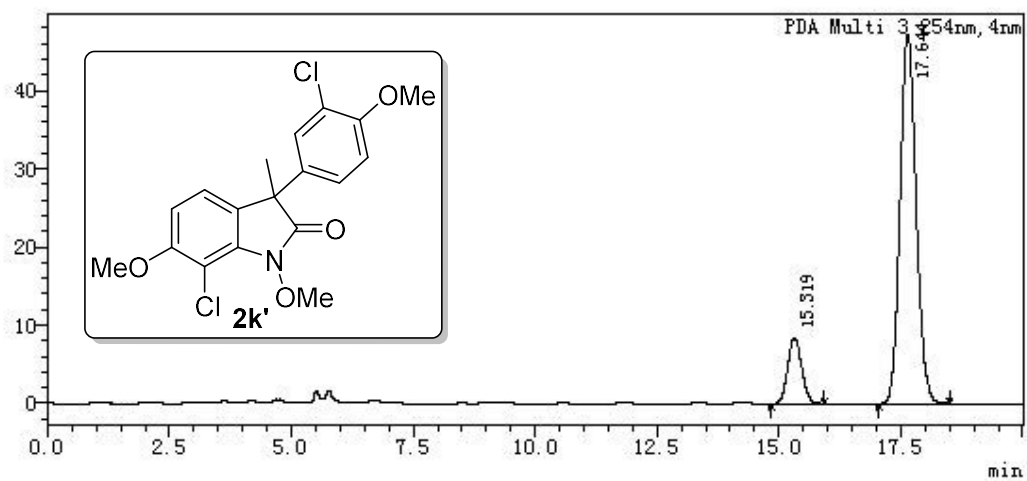

Table

PDA Ch3 254nm

| Number | Retention Time | Height | Height% | Area    | Area%   |
|--------|----------------|--------|---------|---------|---------|
| 1      | 15.319         | 8495   | 15.252  | 167845  | 13.447  |
| 2      | 17.644         | 47203  | 84.748  | 1080328 | 86.553  |
| 总计     |                | 55699  | 100.000 | 1248173 | 100.000 |



Chromatography  
mAU

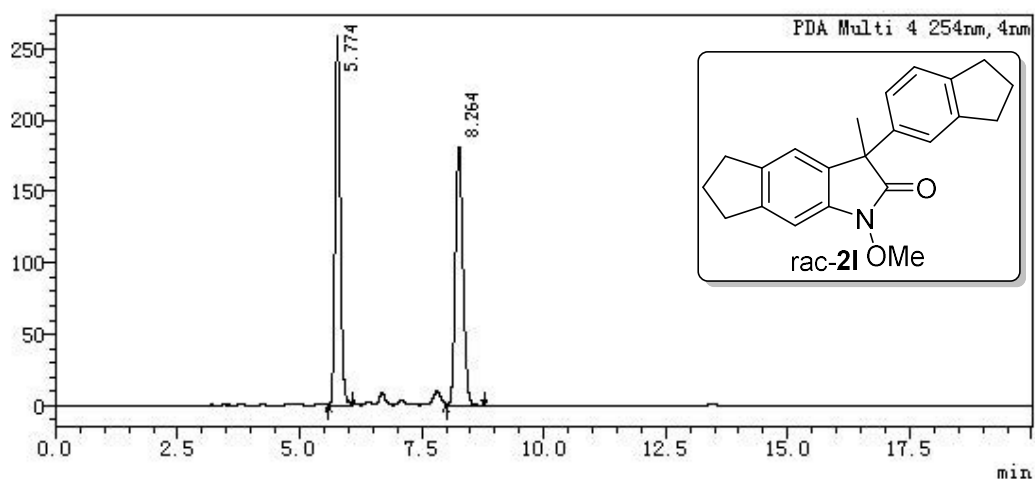

Table

PDA Ch4 254nm

| Number | Retention Time | Height | Height% | Area    | Area%   |
|--------|----------------|--------|---------|---------|---------|
| 1      | 5.774          | 259033 | 58.815  | 1960276 | 49.876  |
| 2      | 8.264          | 181385 | 41.185  | 1970042 | 50.124  |
| 总计     |                | 440418 | 100.000 | 3930318 | 100.000 |

<色谱图>

mAU

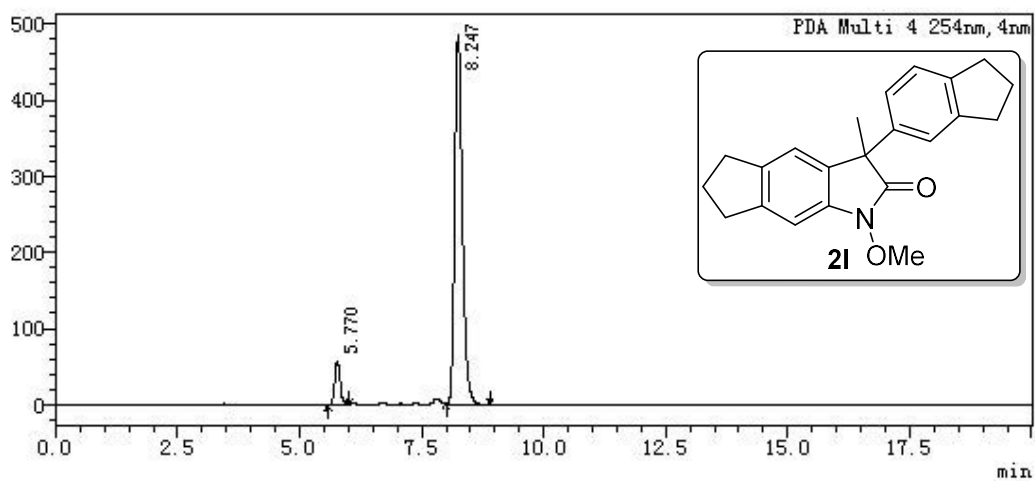

<峰表>

PDA Ch4 254nm

| Number | Retention Time | Height | Height% | Area    | Area%   |
|--------|----------------|--------|---------|---------|---------|
| 1      | 5.770          | 56503  | 10.430  | 431445  | 7.492   |
| 2      | 8.247          | 485229 | 89.570  | 5327287 | 92.508  |
| 总计     |                | 541732 | 100.000 | 5758732 | 100.000 |

Chromatography  
mAU

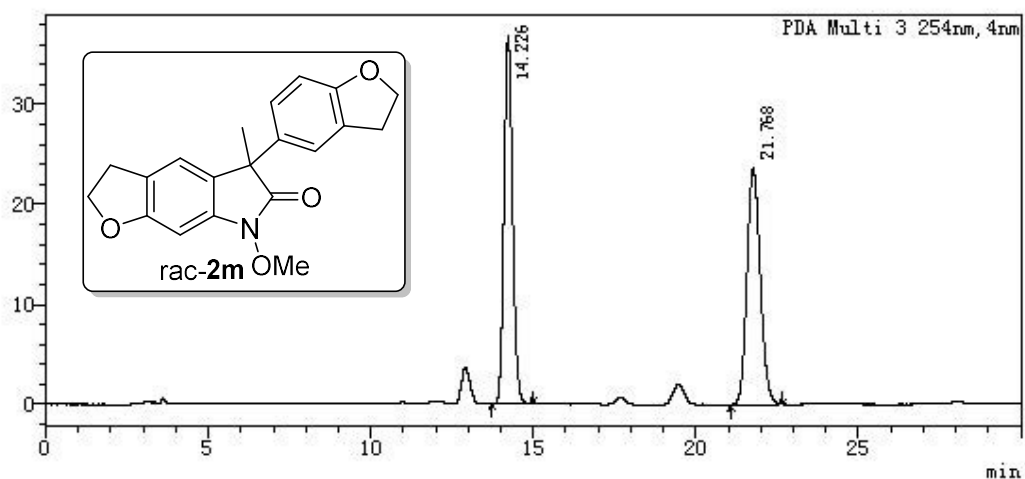

Table

PDA Ch3 254nm

| Number | Retention Time | Height | Height% | Area    | Area%   |
|--------|----------------|--------|---------|---------|---------|
| 1      | 14.226         | 36850  | 60.945  | 670893  | 50.089  |
| 2      | 21.768         | 23614  | 39.055  | 668498  | 49.911  |
| 总计     |                | 60464  | 100.000 | 1339390 | 100.000 |

Chromatography  
mAU

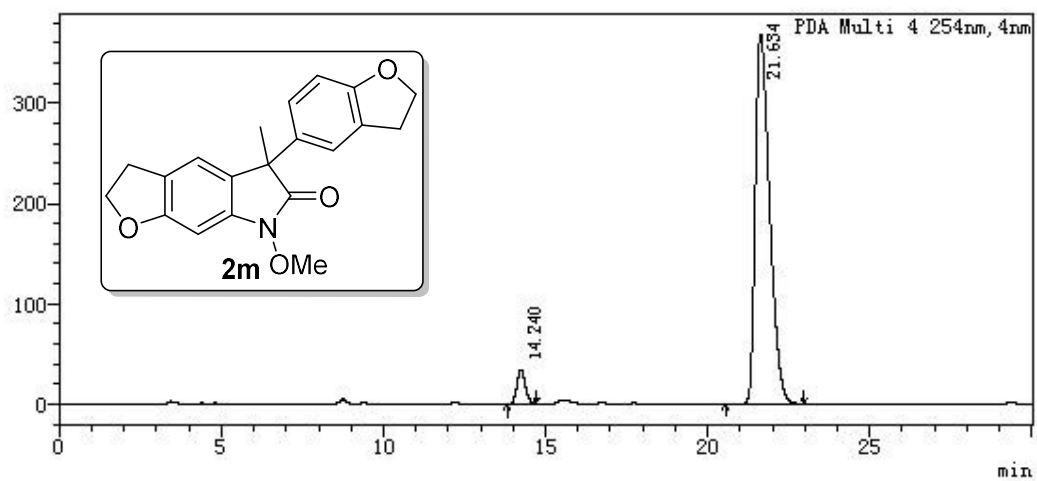

Table

PDA Ch4 254nm

| Number | Retention Time | Height | Height% | Area     | Area%   |
|--------|----------------|--------|---------|----------|---------|
| 1      | 14.240         | 33985  | 8.456   | 619663   | 5.191   |
| 2      | 21.634         | 367896 | 91.544  | 11317255 | 94.809  |
| 总计     |                | 401880 | 100.000 | 11936918 | 100.000 |

Chromatography  
mAU

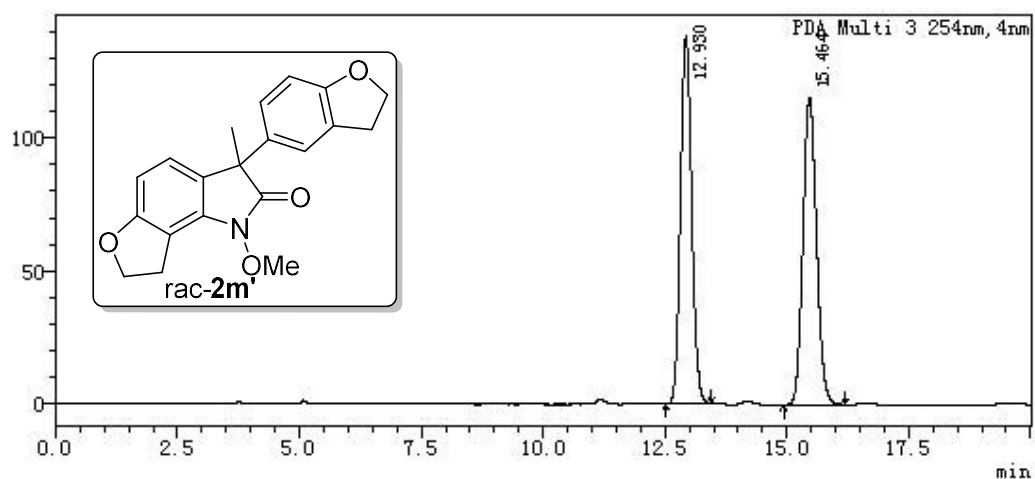

Table

PDA Ch3 254nm

| Number | Retention Time | Height | Height% | Area    | Area%   |
|--------|----------------|--------|---------|---------|---------|
| 1      | 12.930         | 138235 | 54.511  | 2212852 | 49.714  |
| 2      | 15.464         | 115355 | 45.489  | 2238284 | 50.286  |
| 总计     |                | 253591 | 100.000 | 4451136 | 100.000 |

Chromatography  
mAU

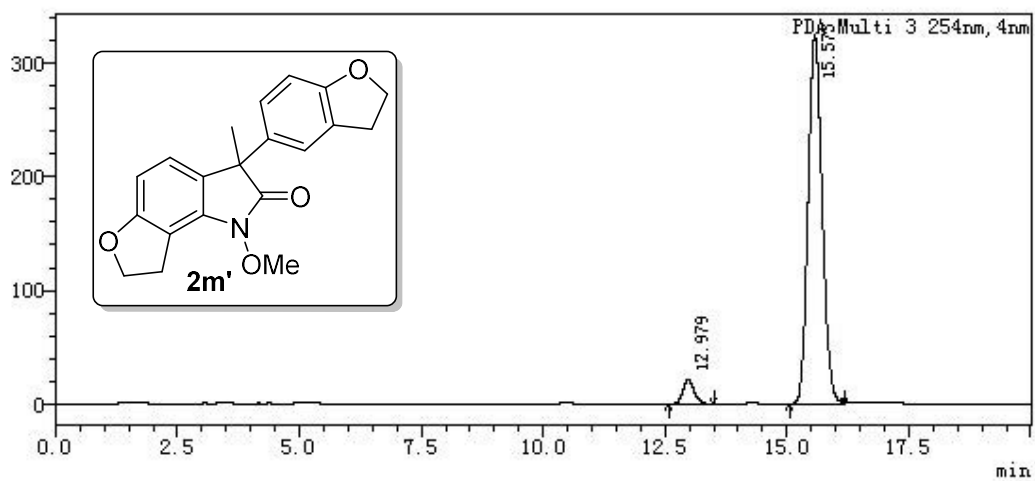

Table

PDA Ch3 254nm

| Number | Retention Time | Height | Height% | Area    | Area%   |
|--------|----------------|--------|---------|---------|---------|
| 1      | 12.979         | 20989  | 6.066   | 344977  | 5.035   |
| 2      | 15.573         | 325028 | 93.934  | 6506026 | 94.965  |
| 总计     |                | 346017 | 100.000 | 6851003 | 100.000 |

Chromatography  
mAU

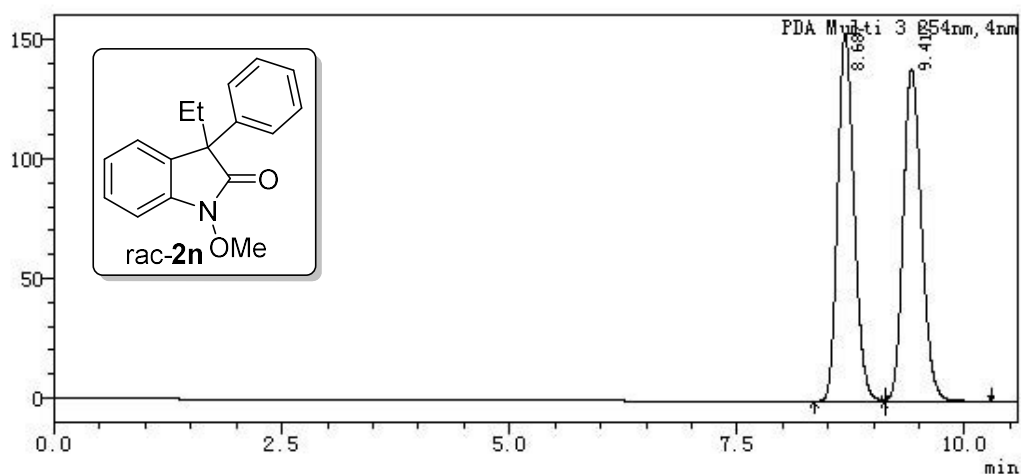

Table

PDA Ch3 254nm

| Number | Retention Time | Height | Height% | Area    | Area%   |
|--------|----------------|--------|---------|---------|---------|
| 1      | 8.687          | 152794 | 52.359  | 1932538 | 49.929  |
| 2      | 9.417          | 139026 | 47.641  | 1938014 | 50.071  |
| 总计     |                | 291819 | 100.000 | 3870551 | 100.000 |

Chromatography  
mAU

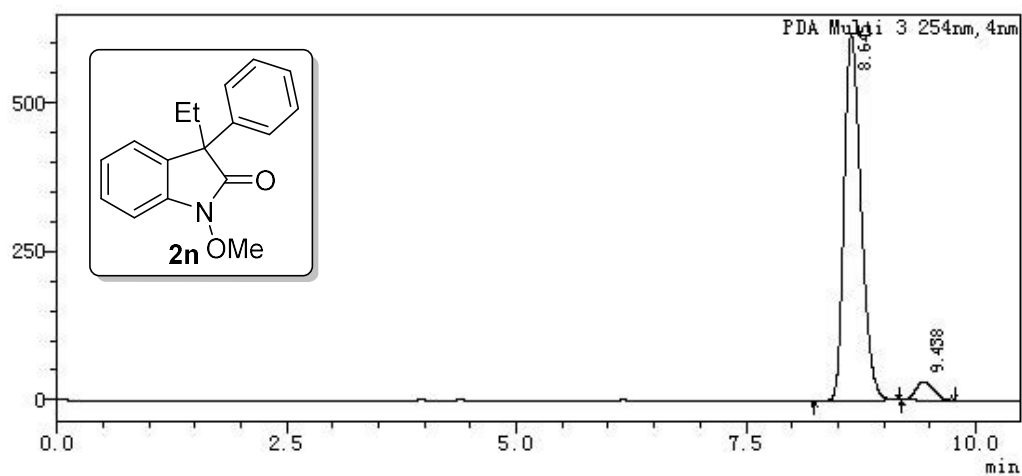

Table

PDA Ch3 254nm

| Number | Retention Time | Height | Height% | Area    | Area%   |
|--------|----------------|--------|---------|---------|---------|
| 1      | 8.645          | 613123 | 95.163  | 7843920 | 94.911  |
| 2      | 9.438          | 31162  | 4.837   | 420556  | 5.089   |
| 总计     |                | 644284 | 100.000 | 8264476 | 100.000 |

Chromatography  
mAU

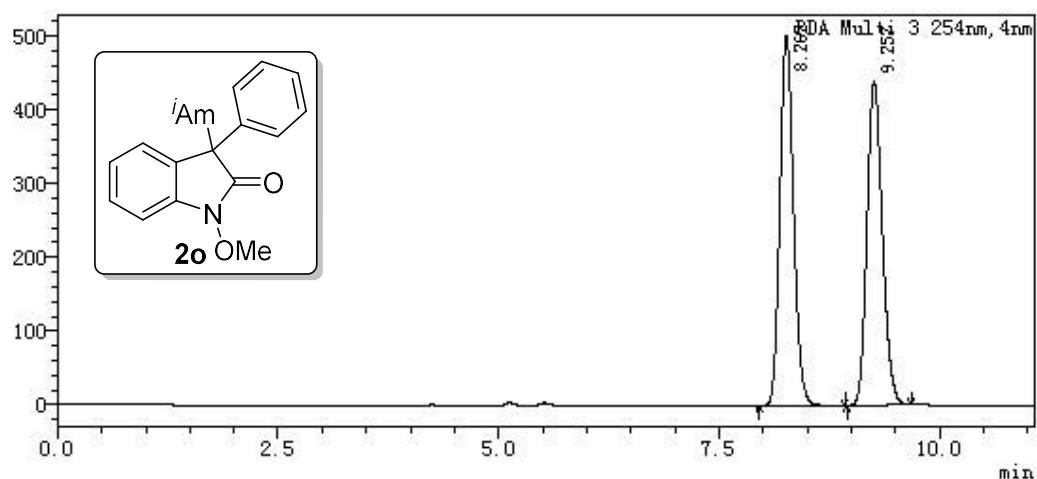

Table

PDA Ch3 254nm

| Number | Retention Time | Height | Height% | Area     | Area%   |
|--------|----------------|--------|---------|----------|---------|
| 1      | 8.262          | 501571 | 53.352  | 5363431  | 50.166  |
| 2      | 9.257          | 438551 | 46.648  | 5327927  | 49.834  |
| 总计     |                | 940122 | 100.000 | 10691358 | 100.000 |

Chromatography  
mAU

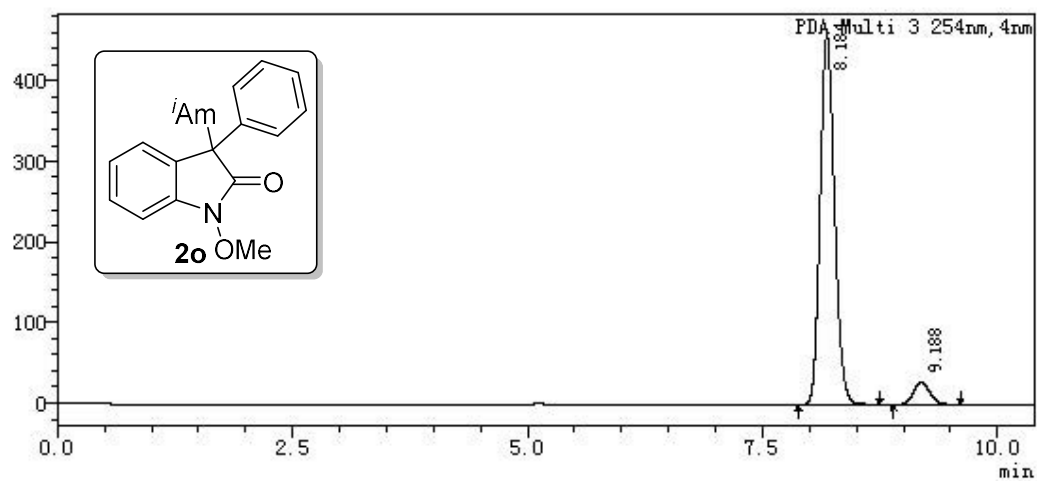

Table

PDA Ch3 254nm

| Number | Retention Time | Height | Height% | Area    | Area%   |
|--------|----------------|--------|---------|---------|---------|
| 1      | 8.184          | 459084 | 94.184  | 4873427 | 93.463  |
| 2      | 9.188          | 28352  | 5.816   | 340848  | 6.537   |
| 总计     |                | 487435 | 100.000 | 5214275 | 100.000 |

Chromatography  
mAU

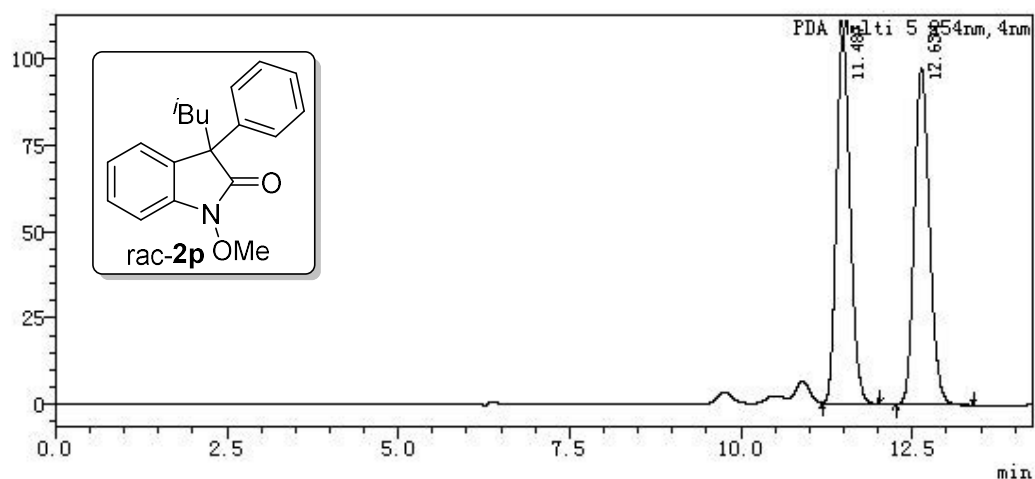

Table

PDA Ch5 254nm

| Number | Retention Time | Height | Height% | Area    | Area%   |
|--------|----------------|--------|---------|---------|---------|
| 1      | 11.487         | 106452 | 52.245  | 1483140 | 49.698  |
| 2      | 12.634         | 97305  | 47.755  | 1501191 | 50.302  |
| 总计     |                | 203757 | 100.000 | 2984331 | 100.000 |

Chromatography  
mAU

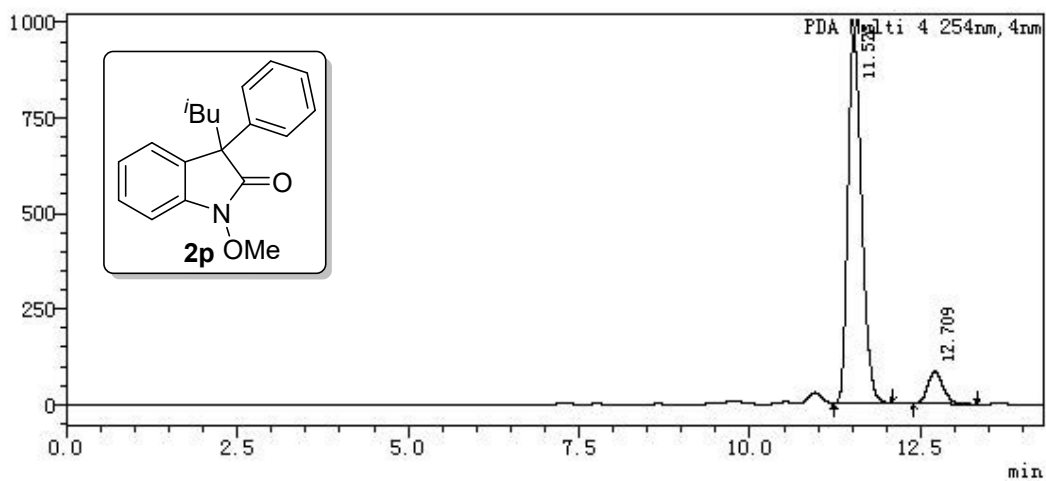

Table

PDA Ch4 254nm

| Number | Retention Time | Height  | Height% | Area     | Area%   |
|--------|----------------|---------|---------|----------|---------|
| 1      | 11.523         | 964318  | 91.899  | 13583179 | 91.089  |
| 2      | 12.709         | 85010   | 8.101   | 1328732  | 8.911   |
| 总计     |                | 1049328 | 100.000 | 14911911 | 100.000 |

Chromatography  
mAU

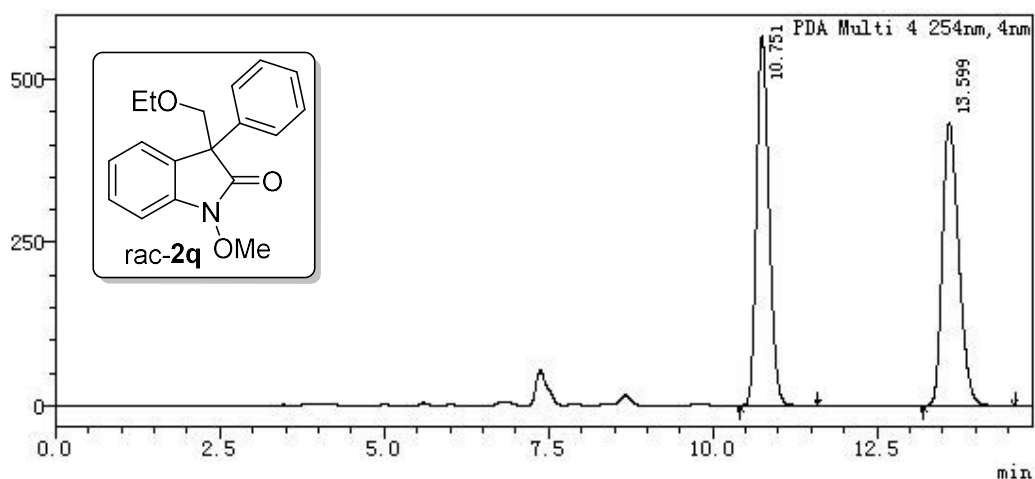

Table

PDA Ch4 254nm

| Number | Retention Time | Height | Height% | Area     | Area%   |
|--------|----------------|--------|---------|----------|---------|
| 1      | 10.751         | 566113 | 56.687  | 7461695  | 50.029  |
| 2      | 13.599         | 432552 | 43.313  | 7453067  | 49.971  |
| 总计     |                | 998664 | 100.000 | 14914762 | 100.000 |

Chromatography  
mAU

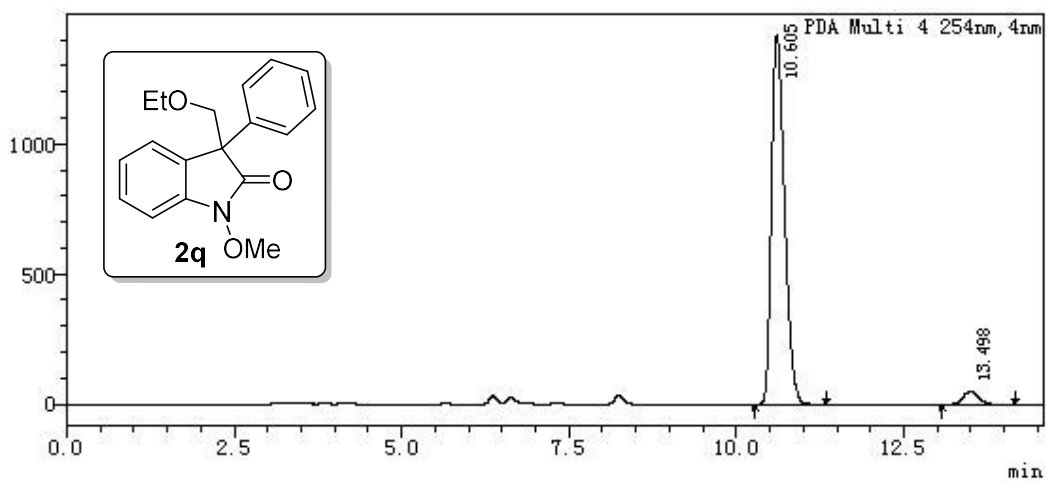

Table

PDA Ch4 254nm

| Number | Retention Time | Height  | Height% | Area     | Area%   |
|--------|----------------|---------|---------|----------|---------|
| 1      | 10.605         | 1419473 | 96.510  | 19218074 | 95.790  |
| 2      | 13.498         | 51329   | 3.490   | 844603   | 4.210   |
| 总计     |                | 1470802 | 100.000 | 20062678 | 100.000 |

Chromatography  
mAU

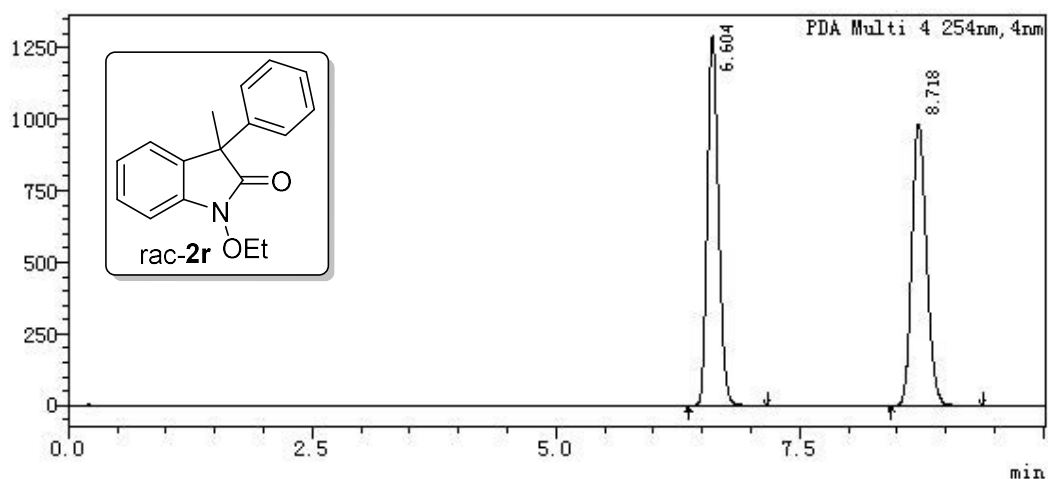

Table

PDA Ch4 254nm

| Number | Retention Time | Height  | Height% | Area     | Area%   |
|--------|----------------|---------|---------|----------|---------|
| 1      | 6.604          | 1292900 | 56.788  | 10238960 | 49.971  |
| 2      | 8.718          | 983805  | 43.212  | 10250708 | 50.029  |
| 总计     |                | 2276706 | 100.000 | 20489668 | 100.000 |

Chromatography  
mAU

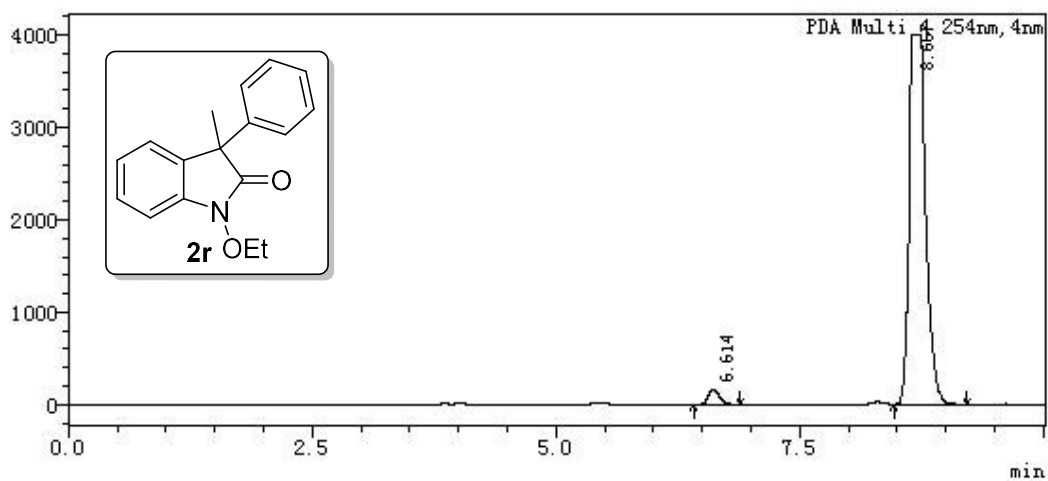

Table

PDA Ch4 254nm

| Number | Retention Time | Height  | Height% | Area     | Area%   |
|--------|----------------|---------|---------|----------|---------|
| 1      | 6.614          | 158235  | 3.807   | 1268857  | 2.615   |
| 2      | 8.667          | 3997858 | 96.193  | 47254941 | 97.385  |
| 总计     |                | 4156093 | 100.000 | 48523798 | 100.000 |



Chromatography  
mAU

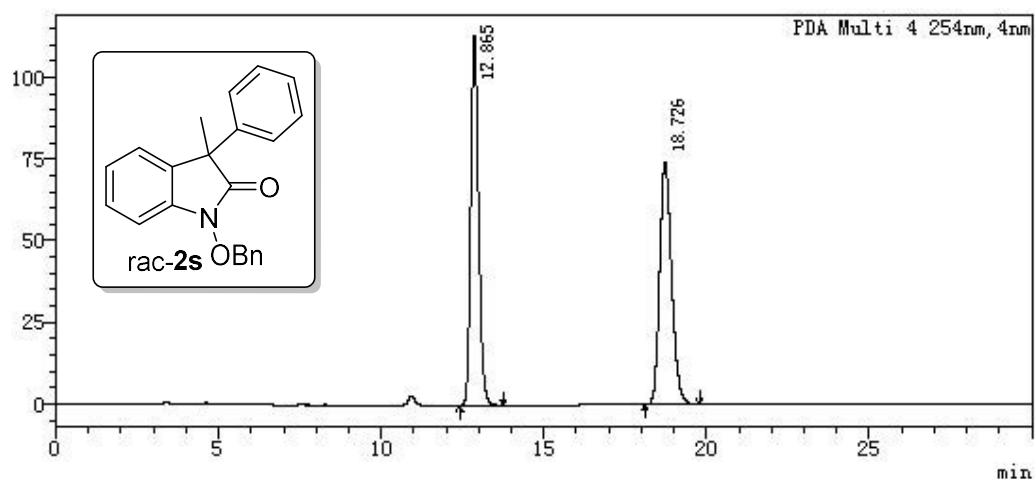

Table

PDA Ch4 254nm

| Number | Retention Time | Height | Height% | Area    | Area%   |
|--------|----------------|--------|---------|---------|---------|
| 1      | 12.865         | 113332 | 60.356  | 1909931 | 50.174  |
| 2      | 18.726         | 74439  | 39.644  | 1896650 | 49.826  |
| 总计     |                | 187771 | 100.000 | 3806581 | 100.000 |

Chromatography  
mAU

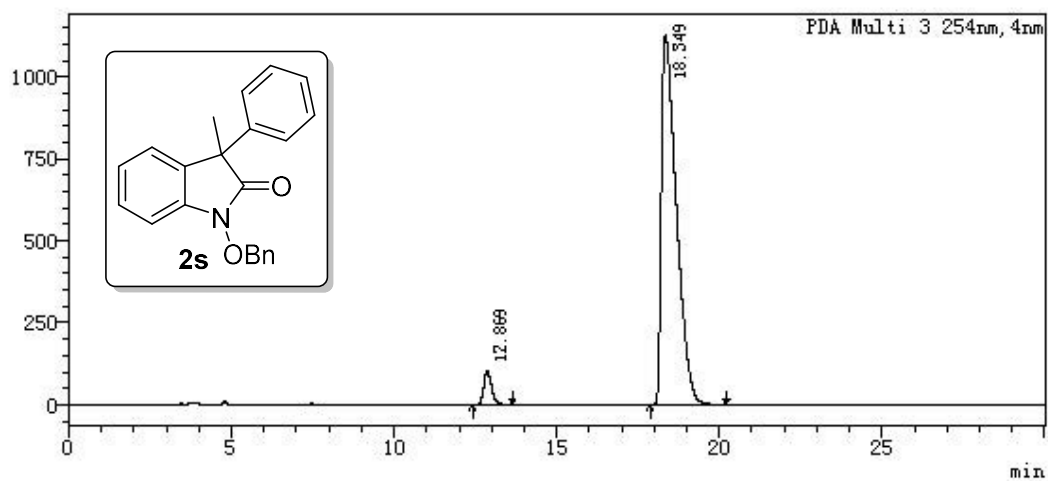

Table

PDA Ch3 254nm

| Number | Retention Time | Height  | Height% | Area     | Area%   |
|--------|----------------|---------|---------|----------|---------|
| 1      | 12.869         | 100850  | 8.206   | 1699816  | 4.498   |
| 2      | 18.349         | 1128156 | 91.794  | 36088095 | 95.502  |
| 总计     |                | 1229007 | 100.000 | 37787912 | 100.000 |

Chromatography  
mAU

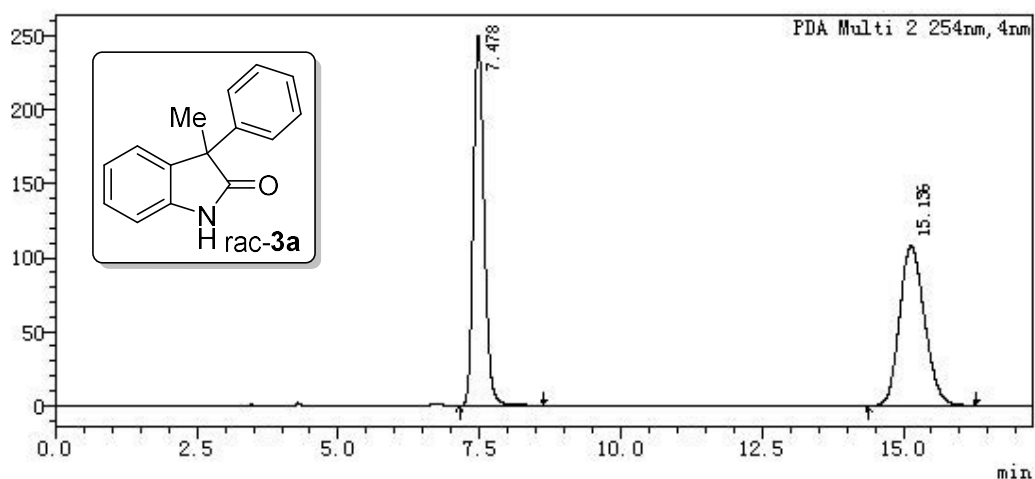

Table

PDA Ch2 254nm

| Number | Retention Time | Height | Height% | Area    | Area%   |
|--------|----------------|--------|---------|---------|---------|
| 1      | 7.478          | 250035 | 69.867  | 3311576 | 50.014  |
| 2      | 15.136         | 107836 | 30.133  | 3309696 | 49.986  |
| 总计     |                | 357871 | 100.000 | 6621271 | 100.000 |

Chromatography  
mAU

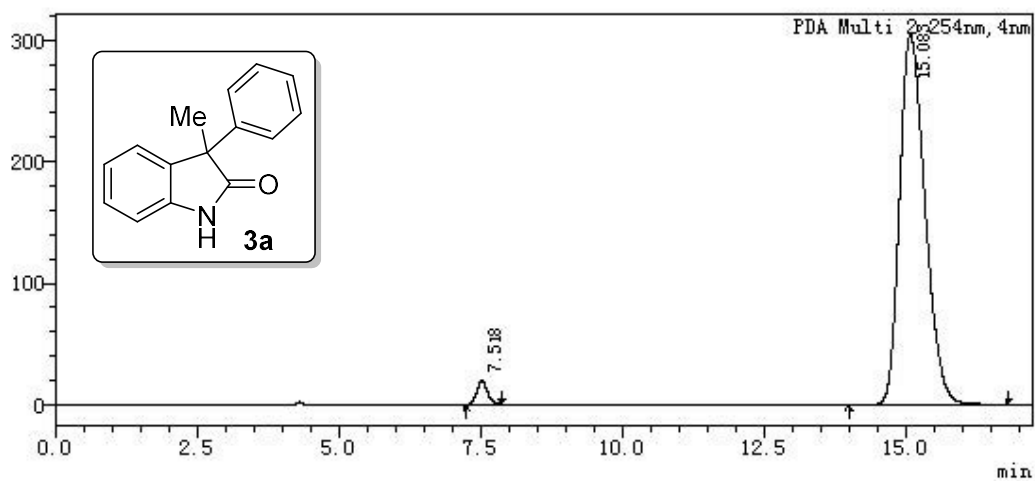

Table

PDA Ch2 254nm

| Number | Retention Time | Height | Height% | Area    | Area%   |
|--------|----------------|--------|---------|---------|---------|
| 1      | 7.518          | 19169  | 5.926   | 251013  | 2.588   |
| 2      | 15.083         | 304324 | 94.074  | 9448286 | 97.412  |
| 总计     |                | 323493 | 100.000 | 9699299 | 100.000 |

Chromatography  
mAU

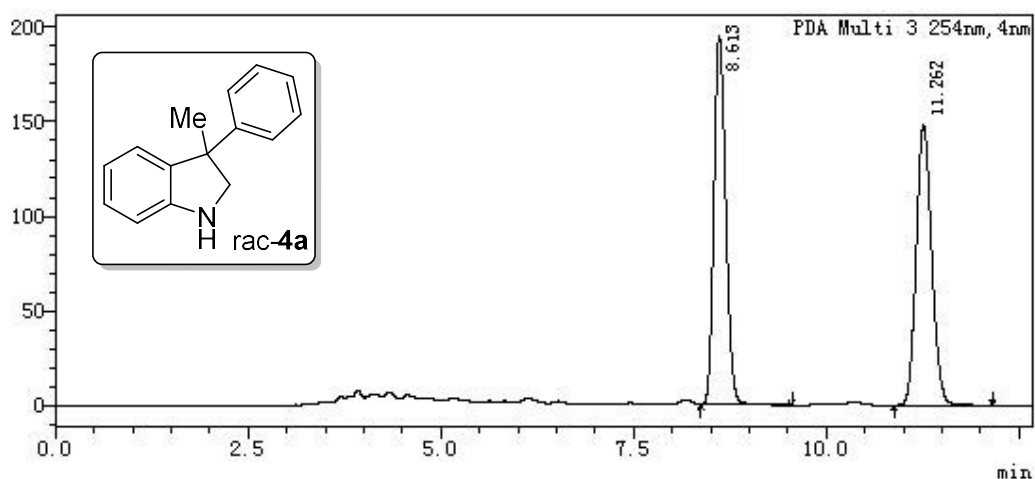

Table

PDA Ch3 254nm

| Number | Retention Time | Height | Height% | Area    | Area%   |
|--------|----------------|--------|---------|---------|---------|
| 1      | 8.613          | 194900 | 56.781  | 2064363 | 49.942  |
| 2      | 11.262         | 148351 | 43.219  | 2069188 | 50.058  |
| 总计     |                | 343251 | 100.000 | 4133551 | 100.000 |

Chromatography  
mAU

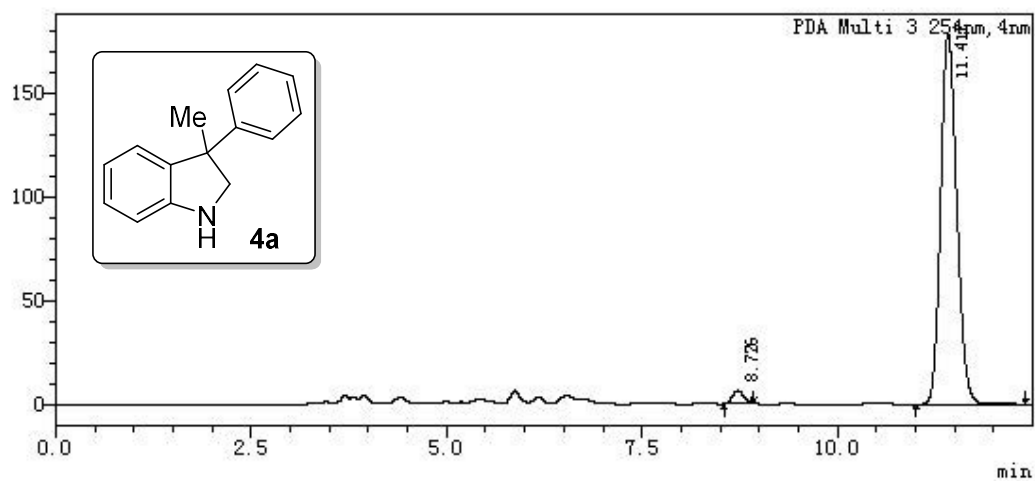

Table

PDA Ch3 254nm

| Number | Retention Time | Height | Height% | Area    | Area%   |
|--------|----------------|--------|---------|---------|---------|
| 1      | 8.726          | 6307   | 3.424   | 62777   | 2.410   |
| 2      | 11.417         | 177910 | 96.576  | 2542003 | 97.590  |
| 总计     |                | 184217 | 100.000 | 2604781 | 100.000 |
